# Supplementary material for: FOXD1 Is a Transcription Factor Important for Uveal Melanocyte Development and Associated with High-Risk Uveal Melanoma
Source: Cancers (Basel). 2022 Jul 28;14(15):3668. doi: 10.3390/cancers14153668 (PMC9367502; doi:10.3390/cancers14153668)
Supplement: Supplementary file 1 [file cancers-14-03668-s001.zip › UM in silico FOXD1 supplementary tables FINAL.xlsx]

## Sheet: Table S1. Extracted gene list
pmelb+ Genelist with total count threshold of 100	pmelb- Genelist with total count threshold of 100	pmelb+ Genelist with total count threshold of 100
ENSDARG00000095072	ENSDARG00000036830	ENSDARG00000000069
ENSDARG00000094559	ENSDARG00000044895	ENSDARG00000000103
ENSDARG00000068507	ENSDARG00000029524	ENSDARG00000000563
ENSDARG00000039173	ENSDARG00000105341	ENSDARG00000001057
ENSDARG00000024548	ENSDARG00000091377	ENSDARG00000001210
ENSDARG00000032929	ENSDARG00000038868	ENSDARG00000001241
ENSDARG00000079376	ENSDARG00000023062	ENSDARG00000001244
ENSDARG00000095254	ENSDARG00000101043	ENSDARG00000001788
ENSDARG00000100833	ENSDARG00000042725	ENSDARG00000001873
ENSDARG00000030411	ENSDARG00000096359	ENSDARG00000001889
ENSDARG00000089750	ENSDARG00000098391	ENSDARG00000001940
ENSDARG00000053875	ENSDARG00000088717	ENSDARG00000001950
ENSDARG00000096905	ENSDARG00000001721	ENSDARG00000002082
ENSDARG00000074306	ENSDARG00000034344	ENSDARG00000002215
ENSDARG00000087651	ENSDARG00000037178	ENSDARG00000002240
ENSDARG00000095744	ENSDARG00000037539	ENSDARG00000002271
ENSDARG00000045143	ENSDARG00000079605	ENSDARG00000002304
ENSDARG00000030349	ENSDARG00000016706	ENSDARG00000002344
ENSDARG00000023656	ENSDARG00000100223	ENSDARG00000002369
ENSDARG00000109861	ENSDARG00000014796	ENSDARG00000002403
ENSDARG00000007576	ENSDARG00000089480	ENSDARG00000002552
ENSDARG00000031483	ENSDARG00000077840	ENSDARG00000002589
ENSDARG00000075527	ENSDARG00000056783	ENSDARG00000002591
ENSDARG00000019122	ENSDARG00000015790	ENSDARG00000002593
ENSDARG00000016793	ENSDARG00000063295	ENSDARG00000002613
ENSDARG00000093493	ENSDARG00000003287	ENSDARG00000002632
ENSDARG00000015445	ENSDARG00000043644	ENSDARG00000002659
ENSDARG00000089806	ENSDARG00000104114	ENSDARG00000002710
ENSDARG00000068974	ENSDARG00000104945	ENSDARG00000002768
ENSDARG00000116164	ENSDARG00000069503	ENSDARG00000002790
ENSDARG00000024492	ENSDARG00000005754	ENSDARG00000002791
ENSDARG00000100133	ENSDARG00000089291	ENSDARG00000002949
ENSDARG00000087765	ENSDARG00000104034	ENSDARG00000002952
ENSDARG00000037285	ENSDARG00000028618	ENSDARG00000003032
ENSDARG00000040118	ENSDARG00000070006	ENSDARG00000003035
ENSDARG00000041925	ENSDARG00000014676	ENSDARG00000003151
ENSDARG00000074001	ENSDARG00000055100	ENSDARG00000003153
ENSDARG00000011166	ENSDARG00000058693	ENSDARG00000003165
ENSDARG00000055527	ENSDARG00000100398	ENSDARG00000003189
ENSDARG00000012881	ENSDARG00000102353	ENSDARG00000003216
ENSDARG00000062025	ENSDARG00000070787	ENSDARG00000003308
ENSDARG00000067995	ENSDARG00000030402	ENSDARG00000003429
ENSDARG00000037845	ENSDARG00000043074	ENSDARG00000003486
ENSDARG00000000212	ENSDARG00000087238	ENSDARG00000003526
ENSDARG00000092383	ENSDARG00000004525	ENSDARG00000003527
ENSDARG00000071586	ENSDARG00000009494	ENSDARG00000003531
ENSDARG00000057460	ENSDARG00000026473	ENSDARG00000003564
ENSDARG00000036876	ENSDARG00000034056	ENSDARG00000003570
ENSDARG00000088823	ENSDARG00000054849	ENSDARG00000003599
ENSDARG00000020527	ENSDARG00000003808	ENSDARG00000003607
ENSDARG00000091996	ENSDARG00000079964	ENSDARG00000003641
ENSDARG00000090309	ENSDARG00000076074	ENSDARG00000003681
ENSDARG00000054321	ENSDARG00000101710	ENSDARG00000003693
ENSDARG00000091148	ENSDARG00000100244	ENSDARG00000003695
ENSDARG00000008333	ENSDARG00000052567	ENSDARG00000003732
ENSDARG00000038643	ENSDARG00000040695	ENSDARG00000003749
ENSDARG00000042874	ENSDARG00000002168	ENSDARG00000003795
ENSDARG00000045898	ENSDARG00000033965	ENSDARG00000003860
ENSDARG00000096667	ENSDARG00000021924	ENSDARG00000003920
ENSDARG00000012944	ENSDARG00000042525	ENSDARG00000003938
ENSDARG00000074745	ENSDARG00000002190	ENSDARG00000003941
ENSDARG00000053370	ENSDARG00000011683	ENSDARG00000003952
ENSDARG00000045142	ENSDARG00000089441	ENSDARG00000004034
ENSDARG00000032630	ENSDARG00000093007	ENSDARG00000004049
ENSDARG00000116713	ENSDARG00000038239	ENSDARG00000004060
ENSDARG00000100372	ENSDARG00000012066	ENSDARG00000004161
ENSDARG00000077536	ENSDARG00000026577	ENSDARG00000004169
ENSDARG00000054150	ENSDARG00000023190	ENSDARG00000004189
ENSDARG00000024746	ENSDARG00000036698	ENSDARG00000004232
ENSDARG00000034423	ENSDARG00000027740	ENSDARG00000004251
ENSDARG00000054362	ENSDARG00000099309	ENSDARG00000004261
ENSDARG00000015947	ENSDARG00000036593	ENSDARG00000004280
ENSDARG00000045144	ENSDARG00000015554	ENSDARG00000004427
ENSDARG00000068886	ENSDARG00000057890	ENSDARG00000004452
ENSDARG00000096829	ENSDARG00000101085	ENSDARG00000004527
ENSDARG00000099918	ENSDARG00000027734	ENSDARG00000004621
ENSDARG00000103787	ENSDARG00000010641	ENSDARG00000004692
ENSDARG00000075161	ENSDARG00000011076	ENSDARG00000004706
ENSDARG00000092787	ENSDARG00000100719	ENSDARG00000004713
ENSDARG00000003213	ENSDARG00000090634	ENSDARG00000004735
ENSDARG00000103472	ENSDARG00000054942	ENSDARG00000004757
ENSDARG00000019702	ENSDARG00000011961	ENSDARG00000004782
ENSDARG00000090337	ENSDARG00000070991	ENSDARG00000004785
ENSDARG00000005128	ENSDARG00000022139	ENSDARG00000004906
ENSDARG00000114870	ENSDARG00000077828	ENSDARG00000004939
ENSDARG00000088619	ENSDARG00000000690	ENSDARG00000004948
ENSDARG00000043663	ENSDARG00000099014	ENSDARG00000004956
ENSDARG00000041878	ENSDARG00000002745	ENSDARG00000005023
ENSDARG00000102995	ENSDARG00000019253	ENSDARG00000005134
ENSDARG00000061794	ENSDARG00000091813	ENSDARG00000005162
ENSDARG00000104587	ENSDARG00000030449	ENSDARG00000005191
ENSDARG00000008982	ENSDARG00000020795	ENSDARG00000005230
ENSDARG00000024295	ENSDARG00000008861	ENSDARG00000005451
ENSDARG00000008740	ENSDARG00000070266	ENSDARG00000005513
ENSDARG00000030756	ENSDARG00000035598	ENSDARG00000005536
ENSDARG00000005840	ENSDARG00000056122	ENSDARG00000005551
ENSDARG00000068755	ENSDARG00000039647	ENSDARG00000005560
ENSDARG00000021702	ENSDARG00000103736	ENSDARG00000005576
ENSDARG00000018958	ENSDARG00000070404	ENSDARG00000005699
ENSDARG00000102531	ENSDARG00000074671	ENSDARG00000005772
ENSDARG00000057571	ENSDARG00000092240	ENSDARG00000005774
ENSDARG00000037432	ENSDARG00000030530	ENSDARG00000005791
ENSDARG00000059259	ENSDARG00000019274	ENSDARG00000005823
ENSDARG00000002970	ENSDARG00000103522	ENSDARG00000005827
ENSDARG00000009315	ENSDARG00000059279	ENSDARG00000005926
ENSDARG00000056099	ENSDARG00000003835	ENSDARG00000005945
ENSDARG00000044488	ENSDARG00000042824	ENSDARG00000006008
ENSDARG00000061951	ENSDARG00000007818	ENSDARG00000006019
ENSDARG00000054929	ENSDARG00000031336	ENSDARG00000006074
ENSDARG00000117089	ENSDARG00000020239	ENSDARG00000006092
ENSDARG00000037109	ENSDARG00000035924	ENSDARG00000006124
ENSDARG00000098972	ENSDARG00000004930	ENSDARG00000006200
ENSDARG00000070108	ENSDARG00000034757	ENSDARG00000006215
ENSDARG00000060687	ENSDARG00000058047	ENSDARG00000006219
ENSDARG00000042045	ENSDARG00000015866	ENSDARG00000006225
ENSDARG00000091124	ENSDARG00000099694	ENSDARG00000006242
ENSDARG00000075129	ENSDARG00000044902	ENSDARG00000006260
ENSDARG00000103553	ENSDARG00000055064	ENSDARG00000006290
ENSDARG00000023160	ENSDARG00000053858	ENSDARG00000006316
ENSDARG00000010717	ENSDARG00000054916	ENSDARG00000006395
ENSDARG00000012892	ENSDARG00000040046	ENSDARG00000006397
ENSDARG00000058354	ENSDARG00000036456	ENSDARG00000006399
ENSDARG00000052377	ENSDARG00000021195	ENSDARG00000006408
ENSDARG00000099339	ENSDARG00000019231	ENSDARG00000006413
ENSDARG00000035810	ENSDARG00000102191	ENSDARG00000006487
ENSDARG00000057805	ENSDARG00000040177	ENSDARG00000006497
ENSDARG00000055991	ENSDARG00000011934	ENSDARG00000006514
ENSDARG00000069817	ENSDARG00000101914	ENSDARG00000006524
ENSDARG00000097959	ENSDARG00000038439	ENSDARG00000006527
ENSDARG00000103409	ENSDARG00000103735	ENSDARG00000006642
ENSDARG00000101680	ENSDARG00000103271	ENSDARG00000006691
ENSDARG00000054540	ENSDARG00000077467	ENSDARG00000006766
ENSDARG00000011999	ENSDARG00000043963	ENSDARG00000006837
ENSDARG00000087779	ENSDARG00000029443	ENSDARG00000006859
ENSDARG00000039667	ENSDARG00000040257	ENSDARG00000007034
ENSDARG00000026839	ENSDARG00000052783	ENSDARG00000007098
ENSDARG00000008840	ENSDARG00000053269	ENSDARG00000007099
ENSDARG00000099122	ENSDARG00000098813	ENSDARG00000007141
ENSDARG00000036721	ENSDARG00000075666	ENSDARG00000007184
ENSDARG00000020679	ENSDARG00000102750	ENSDARG00000007196
ENSDARG00000036060	ENSDARG00000101849	ENSDARG00000007216
ENSDARG00000071203	ENSDARG00000020924	ENSDARG00000007241
ENSDARG00000033614	ENSDARG00000027984	ENSDARG00000007285
ENSDARG00000020377	ENSDARG00000045677	ENSDARG00000007294
ENSDARG00000042934	ENSDARG00000035557	ENSDARG00000007315
ENSDARG00000028894	ENSDARG00000059391	ENSDARG00000007320
ENSDARG00000075743	ENSDARG00000026582	ENSDARG00000007347
ENSDARG00000038473	ENSDARG00000040971	ENSDARG00000007359
ENSDARG00000070822	ENSDARG00000000189	ENSDARG00000007377
ENSDARG00000103203	ENSDARG00000016470	ENSDARG00000007385
ENSDARG00000014274	ENSDARG00000099729	ENSDARG00000007438
ENSDARG00000061735	ENSDARG00000014303	ENSDARG00000007526
ENSDARG00000019765	ENSDARG00000101461	ENSDARG00000007693
ENSDARG00000092035	ENSDARG00000042840	ENSDARG00000007697
ENSDARG00000040944	ENSDARG00000004406	ENSDARG00000007708
ENSDARG00000061458	ENSDARG00000023988	ENSDARG00000007720
ENSDARG00000101332	ENSDARG00000059610	ENSDARG00000007745
ENSDARG00000070560	ENSDARG00000055543	ENSDARG00000007791
ENSDARG00000058030	ENSDARG00000044048	ENSDARG00000007795
ENSDARG00000092033	ENSDARG00000013628	ENSDARG00000007823
ENSDARG00000062147	ENSDARG00000020235	ENSDARG00000007836
ENSDARG00000112087	ENSDARG00000036774	ENSDARG00000007863
ENSDARG00000100116	ENSDARG00000104470	ENSDARG00000007960
ENSDARG00000009253	ENSDARG00000023318	ENSDARG00000007971
ENSDARG00000008407	ENSDARG00000007276	ENSDARG00000007989
ENSDARG00000045733	ENSDARG00000009280	ENSDARG00000008020
ENSDARG00000096668	ENSDARG00000069846	ENSDARG00000008030
ENSDARG00000045542	ENSDARG00000020497	ENSDARG00000008049
ENSDARG00000067984	ENSDARG00000021647	ENSDARG00000008097
ENSDARG00000044437	ENSDARG00000021488	ENSDARG00000008153
ENSDARG00000043402	ENSDARG00000021343	ENSDARG00000008188
ENSDARG00000023536	ENSDARG00000021443	ENSDARG00000008237
ENSDARG00000038737	ENSDARG00000025338	ENSDARG00000008243
ENSDARG00000070723	ENSDARG00000013613	ENSDARG00000008292
ENSDARG00000025301	ENSDARG00000005049	ENSDARG00000008363
ENSDARG00000070431	ENSDARG00000056028	ENSDARG00000008383
ENSDARG00000002538	ENSDARG00000014428	ENSDARG00000008447
ENSDARG00000037402	ENSDARG00000054723	ENSDARG00000008494
ENSDARG00000042969	ENSDARG00000058730	ENSDARG00000008502
ENSDARG00000012672	ENSDARG00000068262	ENSDARG00000008551
ENSDARG00000016363	ENSDARG00000045180	ENSDARG00000008678
ENSDARG00000068567	ENSDARG00000024276	ENSDARG00000008706
ENSDARG00000057317	ENSDARG00000019438	ENSDARG00000008735
ENSDARG00000040059	ENSDARG00000071697	ENSDARG00000008748
ENSDARG00000091655	ENSDARG00000010032	ENSDARG00000008785
ENSDARG00000062506	ENSDARG00000035360	ENSDARG00000008803
ENSDARG00000070109	ENSDARG00000042133	ENSDARG00000008867
ENSDARG00000068177	ENSDARG00000027547	ENSDARG00000008886
ENSDARG00000104169	ENSDARG00000110756	ENSDARG00000008936
ENSDARG00000031560	ENSDARG00000043443	ENSDARG00000008947
ENSDARG00000032985	ENSDARG00000075014	ENSDARG00000009001
ENSDARG00000006003	ENSDARG00000013576	ENSDARG00000009106
ENSDARG00000013150	ENSDARG00000099730	ENSDARG00000009170
ENSDARG00000061547	ENSDARG00000097487	ENSDARG00000009212
ENSDARG00000059483	ENSDARG00000056744	ENSDARG00000009250
ENSDARG00000074271	ENSDARG00000042815	ENSDARG00000009285
ENSDARG00000026448	ENSDARG00000032369	ENSDARG00000009346
ENSDARG00000001890	ENSDARG00000027200	ENSDARG00000009447
ENSDARG00000099745	ENSDARG00000097964	ENSDARG00000009484
ENSDARG00000101295	ENSDARG00000089368	ENSDARG00000009505
ENSDARG00000051748	ENSDARG00000028067	ENSDARG00000009534
ENSDARG00000008370	ENSDARG00000079516	ENSDARG00000009544
ENSDARG00000012341	ENSDARG00000042853	ENSDARG00000009553
ENSDARG00000042894	ENSDARG00000099510	ENSDARG00000009640
ENSDARG00000003098	ENSDARG00000053097	ENSDARG00000009753
ENSDARG00000033647	ENSDARG00000000853	ENSDARG00000009779
ENSDARG00000058206	ENSDARG00000060350	ENSDARG00000009822
ENSDARG00000044153	ENSDARG00000003573	ENSDARG00000009823
ENSDARG00000056475	ENSDARG00000034503	ENSDARG00000009830
ENSDARG00000007405	ENSDARG00000101181	ENSDARG00000009871
ENSDARG00000012495	ENSDARG00000015425	ENSDARG00000009881
ENSDARG00000002506	ENSDARG00000040192	ENSDARG00000009950
ENSDARG00000005738	ENSDARG00000027154	ENSDARG00000009978
ENSDARG00000071445	ENSDARG00000069302	ENSDARG00000010008
ENSDARG00000040555	ENSDARG00000040606	ENSDARG00000010113
ENSDARG00000045797	ENSDARG00000019081	ENSDARG00000010149
ENSDARG00000038228	ENSDARG00000007711	ENSDARG00000010160
ENSDARG00000017841	ENSDARG00000028517	ENSDARG00000010192
ENSDARG00000010316	ENSDARG00000035470	ENSDARG00000010194
ENSDARG00000101877	ENSDARG00000038432	ENSDARG00000010238
ENSDARG00000037570	ENSDARG00000101908	ENSDARG00000010244
ENSDARG00000032802	ENSDARG00000036541	ENSDARG00000010246
ENSDARG00000103027	ENSDARG00000020761	ENSDARG00000010250
ENSDARG00000035987	ENSDARG00000039392	ENSDARG00000010266
ENSDARG00000100114	ENSDARG00000087402	ENSDARG00000010381
ENSDARG00000011000	ENSDARG00000087277	ENSDARG00000010478
ENSDARG00000038743	ENSDARG00000014646	ENSDARG00000010481
ENSDARG00000024465	ENSDARG00000010519	ENSDARG00000010487
ENSDARG00000003081	ENSDARG00000006370	ENSDARG00000010516
ENSDARG00000002523	ENSDARG00000102106	ENSDARG00000010553
ENSDARG00000013734	ENSDARG00000032131	ENSDARG00000010571
ENSDARG00000040162	ENSDARG00000053315	ENSDARG00000010710
ENSDARG00000052893	ENSDARG00000002758	ENSDARG00000010721
ENSDARG00000003382	ENSDARG00000100729	ENSDARG00000010770
ENSDARG00000098934	ENSDARG00000021366	ENSDARG00000010791
ENSDARG00000076857	ENSDARG00000098304	ENSDARG00000010792
ENSDARG00000058115	ENSDARG00000045847	ENSDARG00000010873
ENSDARG00000014517	ENSDARG00000068030	ENSDARG00000010878
ENSDARG00000039913	ENSDARG00000003008	ENSDARG00000010962
ENSDARG00000007065	ENSDARG00000096678	ENSDARG00000010965
ENSDARG00000044751	ENSDARG00000036704	ENSDARG00000011094
ENSDARG00000038027	ENSDARG00000102070	ENSDARG00000011125
ENSDARG00000022232	ENSDARG00000077850	ENSDARG00000011146
ENSDARG00000042534	ENSDARG00000045524	ENSDARG00000011201
ENSDARG00000075677	ENSDARG00000043009	ENSDARG00000011404
ENSDARG00000020890	ENSDARG00000103543	ENSDARG00000011405
ENSDARG00000003469	ENSDARG00000098853	ENSDARG00000011407
ENSDARG00000044760	ENSDARG00000003931	ENSDARG00000011510
ENSDARG00000091402	ENSDARG00000036658	ENSDARG00000011553
ENSDARG00000045019	ENSDARG00000044605	ENSDARG00000011564
ENSDARG00000052244	ENSDARG00000004588	ENSDARG00000011594
ENSDARG00000075682	ENSDARG00000093844	ENSDARG00000011611
ENSDARG00000044942	ENSDARG00000016200	ENSDARG00000011613
ENSDARG00000075625	ENSDARG00000036942	ENSDARG00000011648
ENSDARG00000013763	ENSDARG00000039682	ENSDARG00000011665
ENSDARG00000098080	ENSDARG00000010727	ENSDARG00000011740
ENSDARG00000098367	ENSDARG00000086332	ENSDARG00000011841
ENSDARG00000034600	ENSDARG00000098075	ENSDARG00000011921
ENSDARG00000093052	ENSDARG00000062003	ENSDARG00000012078
ENSDARG00000044625	ENSDARG00000100376	ENSDARG00000012234
ENSDARG00000062916	ENSDARG00000061757	ENSDARG00000012244
ENSDARG00000058148	ENSDARG00000053979	ENSDARG00000012274
ENSDARG00000005254	ENSDARG00000042837	ENSDARG00000012387
ENSDARG00000035324	ENSDARG00000068478	ENSDARG00000012399
ENSDARG00000076572	ENSDARG00000019130	ENSDARG00000012405
ENSDARG00000102056	ENSDARG00000020328	ENSDARG00000012432
ENSDARG00000053862	ENSDARG00000005172	ENSDARG00000012458
ENSDARG00000057378	ENSDARG00000052429	ENSDARG00000012505
ENSDARG00000029100	ENSDARG00000003017	ENSDARG00000012513
ENSDARG00000001129	ENSDARG00000089920	ENSDARG00000012553
ENSDARG00000054213	ENSDARG00000087456	ENSDARG00000012593
ENSDARG00000006251	ENSDARG00000019383	ENSDARG00000012603
ENSDARG00000018272	ENSDARG00000011459	ENSDARG00000012682
ENSDARG00000005058	ENSDARG00000003373	ENSDARG00000012688
ENSDARG00000058079	ENSDARG00000092493	ENSDARG00000012747
ENSDARG00000025977	ENSDARG00000018602	ENSDARG00000012777
ENSDARG00000027649	ENSDARG00000099465	ENSDARG00000012820
ENSDARG00000031216	ENSDARG00000009418	ENSDARG00000012972
ENSDARG00000103783	ENSDARG00000075132	ENSDARG00000012987
ENSDARG00000024829		ENSDARG00000013016
ENSDARG00000070568		ENSDARG00000013031
ENSDARG00000067639		ENSDARG00000013044
ENSDARG00000053685		ENSDARG00000013075
ENSDARG00000071425		ENSDARG00000013078
ENSDARG00000074624		ENSDARG00000013144
ENSDARG00000094277		ENSDARG00000013307
ENSDARG00000042796		ENSDARG00000013333
ENSDARG00000043680		ENSDARG00000013351
ENSDARG00000033596		ENSDARG00000013379
ENSDARG00000007387		ENSDARG00000013382
ENSDARG00000008131		ENSDARG00000013443
ENSDARG00000077361		ENSDARG00000013475
ENSDARG00000052816		ENSDARG00000013623
ENSDARG00000039350		ENSDARG00000013655
ENSDARG00000052182		ENSDARG00000013670
ENSDARG00000101277		ENSDARG00000013729
ENSDARG00000016345		ENSDARG00000013800
ENSDARG00000019223		ENSDARG00000013804
ENSDARG00000091419		ENSDARG00000013822
ENSDARG00000018146		ENSDARG00000013863
ENSDARG00000071497		ENSDARG00000013931
ENSDARG00000010745		ENSDARG00000013938
ENSDARG00000089921		ENSDARG00000013966
ENSDARG00000037654		ENSDARG00000013968
ENSDARG00000041991		ENSDARG00000013976
ENSDARG00000069118		ENSDARG00000013979
ENSDARG00000056627		ENSDARG00000014013
ENSDARG00000000394		ENSDARG00000014015
ENSDARG00000114552		ENSDARG00000014017
ENSDARG00000041226		ENSDARG00000014083
ENSDARG00000038456		ENSDARG00000014159
ENSDARG00000103379		ENSDARG00000014165
ENSDARG00000006621		ENSDARG00000014171
ENSDARG00000079202		ENSDARG00000014196
ENSDARG00000017014		ENSDARG00000014222
ENSDARG00000011079		ENSDARG00000014230
ENSDARG00000055635		ENSDARG00000014244
ENSDARG00000003487		ENSDARG00000014313
ENSDARG00000012422		ENSDARG00000014329
ENSDARG00000058725		ENSDARG00000014366
ENSDARG00000025889		ENSDARG00000014420
ENSDARG00000014522		ENSDARG00000014498
ENSDARG00000053101		ENSDARG00000014499
ENSDARG00000099371		ENSDARG00000014536
ENSDARG00000018903		ENSDARG00000014569
ENSDARG00000012684		ENSDARG00000014571
ENSDARG00000015161		ENSDARG00000014587
ENSDARG00000005315		ENSDARG00000014591
ENSDARG00000030161		ENSDARG00000014685
ENSDARG00000022410		ENSDARG00000014690
ENSDARG00000103127		ENSDARG00000014731
ENSDARG00000070589		ENSDARG00000014763
ENSDARG00000017658		ENSDARG00000014794
ENSDARG00000103893		ENSDARG00000014806
ENSDARG00000015966		ENSDARG00000014817
ENSDARG00000012519		ENSDARG00000014867
ENSDARG00000057322		ENSDARG00000014898
ENSDARG00000004160		ENSDARG00000014915
ENSDARG00000076780		ENSDARG00000015050
ENSDARG00000007257		ENSDARG00000015088
ENSDARG00000051986		ENSDARG00000015111
ENSDARG00000097615		ENSDARG00000015123
ENSDARG00000022165		ENSDARG00000015128
ENSDARG00000044584		ENSDARG00000015164
ENSDARG00000046141		ENSDARG00000015206
ENSDARG00000014333		ENSDARG00000015208
ENSDARG00000099143		ENSDARG00000015239
ENSDARG00000039872		ENSDARG00000015292
ENSDARG00000042851		ENSDARG00000015310
ENSDARG00000041799		ENSDARG00000015314
ENSDARG00000017843		ENSDARG00000015315
ENSDARG00000045297		ENSDARG00000015325
ENSDARG00000059768		ENSDARG00000015385
ENSDARG00000095623		ENSDARG00000015392
ENSDARG00000022399		ENSDARG00000015394
ENSDARG00000007275		ENSDARG00000015422
ENSDARG00000010137		ENSDARG00000015427
ENSDARG00000002194		ENSDARG00000015524
ENSDARG00000016864		ENSDARG00000015551
ENSDARG00000019008		ENSDARG00000015559
ENSDARG00000071018		ENSDARG00000015638
ENSDARG00000038099		ENSDARG00000015649
ENSDARG00000017105		ENSDARG00000015722
ENSDARG00000069980		ENSDARG00000015757
ENSDARG00000069527		ENSDARG00000015759
ENSDARG00000102974		ENSDARG00000015835
ENSDARG00000038290		ENSDARG00000015851
ENSDARG00000098312		ENSDARG00000015862
ENSDARG00000007430		ENSDARG00000015887
ENSDARG00000009806		ENSDARG00000015889
ENSDARG00000058861		ENSDARG00000015921
ENSDARG00000038967		ENSDARG00000015930
ENSDARG00000045692		ENSDARG00000015978
ENSDARG00000100968		ENSDARG00000015990
ENSDARG00000006235		ENSDARG00000016128
ENSDARG00000000503		ENSDARG00000016153
ENSDARG00000105117		ENSDARG00000016156
ENSDARG00000009342		ENSDARG00000016173
ENSDARG00000030278		ENSDARG00000016239
ENSDARG00000069878		ENSDARG00000016260
ENSDARG00000045676		ENSDARG00000016280
ENSDARG00000033126		ENSDARG00000016443
ENSDARG00000020607		ENSDARG00000016484
ENSDARG00000034855		ENSDARG00000016516
ENSDARG00000077506		ENSDARG00000016548
ENSDARG00000033184		ENSDARG00000016623
ENSDARG00000098361		ENSDARG00000016649
ENSDARG00000102009		ENSDARG00000016691
ENSDARG00000056914		ENSDARG00000016725
ENSDARG00000074390		ENSDARG00000016733
ENSDARG00000061124		ENSDARG00000016754
ENSDARG00000057583		ENSDARG00000016763
ENSDARG00000101251		ENSDARG00000016783
ENSDARG00000029179		ENSDARG00000016830
ENSDARG00000011555		ENSDARG00000016855
ENSDARG00000105286		ENSDARG00000016871
ENSDARG00000012485		ENSDARG00000016889
ENSDARG00000036394		ENSDARG00000016903
ENSDARG00000029724		ENSDARG00000016999
ENSDARG00000078433		ENSDARG00000017084
ENSDARG00000031907		ENSDARG00000017219
ENSDARG00000033978		ENSDARG00000017235
ENSDARG00000021987		ENSDARG00000017299
ENSDARG00000088805		ENSDARG00000017314
ENSDARG00000035054		ENSDARG00000017397
ENSDARG00000041011		ENSDARG00000017441
ENSDARG00000016721		ENSDARG00000017445
ENSDARG00000103862		ENSDARG00000017454
ENSDARG00000036070		ENSDARG00000017602
ENSDARG00000018936		ENSDARG00000017624
ENSDARG00000105012		ENSDARG00000017673
ENSDARG00000008255		ENSDARG00000017728
ENSDARG00000071555		ENSDARG00000017740
ENSDARG00000056318		ENSDARG00000017741
ENSDARG00000055760		ENSDARG00000017744
ENSDARG00000045696		ENSDARG00000017762
ENSDARG00000052553		ENSDARG00000017772
ENSDARG00000060309		ENSDARG00000017775
ENSDARG00000005251		ENSDARG00000017844
ENSDARG00000054201		ENSDARG00000017891
ENSDARG00000009273		ENSDARG00000018010
ENSDARG00000028017		ENSDARG00000018049
ENSDARG00000026664		ENSDARG00000018060
ENSDARG00000007081		ENSDARG00000018124
ENSDARG00000016782		ENSDARG00000018241
ENSDARG00000016304		ENSDARG00000018319
ENSDARG00000038312		ENSDARG00000018328
ENSDARG00000008310		ENSDARG00000018334
ENSDARG00000038074		ENSDARG00000018404
ENSDARG00000056803		ENSDARG00000018425
ENSDARG00000069099		ENSDARG00000018461
ENSDARG00000004870		ENSDARG00000018476
ENSDARG00000055357		ENSDARG00000018524
ENSDARG00000029472		ENSDARG00000018562
ENSDARG00000005122		ENSDARG00000018574
ENSDARG00000071378		ENSDARG00000018618
ENSDARG00000045695		ENSDARG00000018637
ENSDARG00000056743		ENSDARG00000018693
ENSDARG00000051798		ENSDARG00000018698
ENSDARG00000002311		ENSDARG00000018890
ENSDARG00000098724		ENSDARG00000018891
ENSDARG00000045808		ENSDARG00000018902
ENSDARG00000031952		ENSDARG00000018914
ENSDARG00000033760		ENSDARG00000018961
ENSDARG00000029057		ENSDARG00000018985
ENSDARG00000051874		ENSDARG00000018989
ENSDARG00000077138		ENSDARG00000019000
ENSDARG00000008306		ENSDARG00000019004
ENSDARG00000043701		ENSDARG00000019060
ENSDARG00000005842		ENSDARG00000019062
ENSDARG00000054890		ENSDARG00000019098
ENSDARG00000010946		ENSDARG00000019137
ENSDARG00000069823		ENSDARG00000019181
ENSDARG00000028740		ENSDARG00000019191
ENSDARG00000007480		ENSDARG00000019230
ENSDARG00000039963		ENSDARG00000019332
ENSDARG00000077652		ENSDARG00000019335
ENSDARG00000012504		ENSDARG00000019353
ENSDARG00000011235		ENSDARG00000019362
ENSDARG00000010052		ENSDARG00000019398
ENSDARG00000010785		ENSDARG00000019404
ENSDARG00000071235		ENSDARG00000019417
ENSDARG00000111013		ENSDARG00000019444
ENSDARG00000075045		ENSDARG00000019496
ENSDARG00000039997		ENSDARG00000019507
ENSDARG00000038867		ENSDARG00000019529
ENSDARG00000043322		ENSDARG00000019530
ENSDARG00000027065		ENSDARG00000019572
ENSDARG00000069583		ENSDARG00000019644
ENSDARG00000045758		ENSDARG00000019778
ENSDARG00000006840		ENSDARG00000019810
ENSDARG00000099563		ENSDARG00000019881
ENSDARG00000087697		ENSDARG00000019924
ENSDARG00000001578		ENSDARG00000019941
ENSDARG00000078741		ENSDARG00000019949
ENSDARG00000021059		ENSDARG00000020007
ENSDARG00000058003		ENSDARG00000020008
ENSDARG00000029660		ENSDARG00000020015
ENSDARG00000076602		ENSDARG00000020101
ENSDARG00000033604		ENSDARG00000020133
ENSDARG00000043180		ENSDARG00000020143
ENSDARG00000056331		ENSDARG00000020187
ENSDARG00000035890		ENSDARG00000020197
ENSDARG00000013961		ENSDARG00000020232
ENSDARG00000036784		ENSDARG00000020252
ENSDARG00000016687		ENSDARG00000020258
ENSDARG00000031044		ENSDARG00000020261
ENSDARG00000062442		ENSDARG00000020298
ENSDARG00000061985		ENSDARG00000020311
ENSDARG00000019998		ENSDARG00000020448
ENSDARG00000014106		ENSDARG00000020454
ENSDARG00000099313		ENSDARG00000020465
ENSDARG00000043483		ENSDARG00000020467
ENSDARG00000013430		ENSDARG00000020482
ENSDARG00000069388		ENSDARG00000020504
ENSDARG00000011272		ENSDARG00000020573
ENSDARG00000030703		ENSDARG00000020574
ENSDARG00000020847		ENSDARG00000020693
ENSDARG00000002831		ENSDARG00000020708
ENSDARG00000015575		ENSDARG00000020711
ENSDARG00000007682		ENSDARG00000020850
ENSDARG00000093117		ENSDARG00000020893
ENSDARG00000079280		ENSDARG00000021107
ENSDARG00000030012		ENSDARG00000021112
ENSDARG00000037278		ENSDARG00000021113
ENSDARG00000102055		ENSDARG00000021124
ENSDARG00000031681		ENSDARG00000021143
ENSDARG00000038615		ENSDARG00000021193
ENSDARG00000028048		ENSDARG00000021252
ENSDARG00000034473		ENSDARG00000021257
ENSDARG00000028087		ENSDARG00000021372
ENSDARG00000038881		ENSDARG00000021483
ENSDARG00000034187		ENSDARG00000021550
ENSDARG00000059743		ENSDARG00000021582
ENSDARG00000086753		ENSDARG00000021669
ENSDARG00000027310		ENSDARG00000021753
ENSDARG00000003395		ENSDARG00000021787
ENSDARG00000007959		ENSDARG00000021811
ENSDARG00000030957		ENSDARG00000021838
ENSDARG00000058179		ENSDARG00000021864
ENSDARG00000001975		ENSDARG00000021945
ENSDARG00000104028		ENSDARG00000021973
ENSDARG00000027595		ENSDARG00000021984
ENSDARG00000044362		ENSDARG00000022129
ENSDARG00000059163		ENSDARG00000022213
ENSDARG00000078618		ENSDARG00000022280
ENSDARG00000015349		ENSDARG00000022303
ENSDARG00000099351		ENSDARG00000022315
ENSDARG00000045153		ENSDARG00000022438
ENSDARG00000059053		ENSDARG00000022456
ENSDARG00000098224		ENSDARG00000022509
ENSDARG00000054864		ENSDARG00000022564
ENSDARG00000038694		ENSDARG00000022650
ENSDARG00000016963		ENSDARG00000022684
ENSDARG00000027088		ENSDARG00000022995
ENSDARG00000018077		ENSDARG00000023003
ENSDARG00000039490		ENSDARG00000023028
ENSDARG00000086114		ENSDARG00000023220
ENSDARG00000061120		ENSDARG00000023279
ENSDARG00000056915		ENSDARG00000023290
ENSDARG00000062059		ENSDARG00000023298
ENSDARG00000044295		ENSDARG00000023299
ENSDARG00000104387		ENSDARG00000023323
ENSDARG00000028862		ENSDARG00000023330
ENSDARG00000069607		ENSDARG00000023394
ENSDARG00000087059		ENSDARG00000023472
ENSDARG00000097827		ENSDARG00000023532
ENSDARG00000098108		ENSDARG00000023672
ENSDARG00000101135		ENSDARG00000023852
ENSDARG00000055510		ENSDARG00000023963
ENSDARG00000035869		ENSDARG00000024047
ENSDARG00000102229		ENSDARG00000024109
ENSDARG00000070972		ENSDARG00000024141
ENSDARG00000094730		ENSDARG00000024204
ENSDARG00000037097		ENSDARG00000024278
ENSDARG00000056410		ENSDARG00000024416
ENSDARG00000052690		ENSDARG00000024478
ENSDARG00000043342		ENSDARG00000024488
ENSDARG00000006220		ENSDARG00000024540
ENSDARG00000071626		ENSDARG00000024561
ENSDARG00000018809		ENSDARG00000024651
ENSDARG00000046012		ENSDARG00000024844
ENSDARG00000069478		ENSDARG00000024846
ENSDARG00000011259		ENSDARG00000024877
ENSDARG00000004296		ENSDARG00000024895
ENSDARG00000031720		ENSDARG00000025071
ENSDARG00000016368		ENSDARG00000025073
ENSDARG00000040280		ENSDARG00000025147
ENSDARG00000016598		ENSDARG00000025254
ENSDARG00000089507		ENSDARG00000025326
ENSDARG00000036967		ENSDARG00000025332
ENSDARG00000037421		ENSDARG00000025350
ENSDARG00000019556		ENSDARG00000025375
ENSDARG00000021309		ENSDARG00000025391
ENSDARG00000039381		ENSDARG00000025397
ENSDARG00000007624		ENSDARG00000025428
ENSDARG00000019541		ENSDARG00000025554
ENSDARG00000091418		ENSDARG00000025566
ENSDARG00000036074		ENSDARG00000025581
ENSDARG00000054858		ENSDARG00000025693
ENSDARG00000055339		ENSDARG00000025789
ENSDARG00000010434		ENSDARG00000025850
ENSDARG00000069922		ENSDARG00000025858
ENSDARG00000003705		ENSDARG00000025972
ENSDARG00000008457		ENSDARG00000026072
ENSDARG00000075706		ENSDARG00000026165
ENSDARG00000096594		ENSDARG00000026180
ENSDARG00000034718		ENSDARG00000026183
ENSDARG00000077709		ENSDARG00000026225
ENSDARG00000117130		ENSDARG00000026369
ENSDARG00000005343		ENSDARG00000026476
ENSDARG00000032705		ENSDARG00000026489
ENSDARG00000093303		ENSDARG00000026531
ENSDARG00000069332		ENSDARG00000026634
ENSDARG00000058381		ENSDARG00000026655
ENSDARG00000018738		ENSDARG00000026712
ENSDARG00000074635		ENSDARG00000026726
ENSDARG00000037941		ENSDARG00000026766
ENSDARG00000052994		ENSDARG00000026801
ENSDARG00000102612		ENSDARG00000026829
ENSDARG00000074611		ENSDARG00000026842
ENSDARG00000045886		ENSDARG00000026845
ENSDARG00000003200		ENSDARG00000026908
ENSDARG00000101293		ENSDARG00000026967
ENSDARG00000012625		ENSDARG00000027099
ENSDARG00000020876		ENSDARG00000027141
ENSDARG00000001879		ENSDARG00000027249
ENSDARG00000009499		ENSDARG00000027357
ENSDARG00000052497		ENSDARG00000027590
ENSDARG00000073699		ENSDARG00000027744
ENSDARG00000078567		ENSDARG00000027749
ENSDARG00000102257		ENSDARG00000027750
ENSDARG00000003998		ENSDARG00000027899
ENSDARG00000020645		ENSDARG00000028106
ENSDARG00000089824		ENSDARG00000028119
ENSDARG00000067520		ENSDARG00000028198
ENSDARG00000098766		ENSDARG00000028213
ENSDARG00000052638		ENSDARG00000028327
ENSDARG00000062558		ENSDARG00000028335
ENSDARG00000071518		ENSDARG00000028523
ENSDARG00000052903		ENSDARG00000028688
ENSDARG00000035868		ENSDARG00000028848
ENSDARG00000054797		ENSDARG00000028889
ENSDARG00000101479		ENSDARG00000028971
ENSDARG00000008697		ENSDARG00000029003
ENSDARG00000114760		ENSDARG00000029036
ENSDARG00000076066		ENSDARG00000029058
ENSDARG00000101936		ENSDARG00000029064
ENSDARG00000055901		ENSDARG00000029069
ENSDARG00000095533		ENSDARG00000029072
ENSDARG00000090526		ENSDARG00000029150
ENSDARG00000075282		ENSDARG00000029204
ENSDARG00000032614		ENSDARG00000029248
ENSDARG00000077515		ENSDARG00000029252
ENSDARG00000016532		ENSDARG00000029263
ENSDARG00000061214		ENSDARG00000029406
ENSDARG00000027236		ENSDARG00000029445
		ENSDARG00000029500
		ENSDARG00000029533
		ENSDARG00000029663
		ENSDARG00000029722
		ENSDARG00000029818
		ENSDARG00000030038
		ENSDARG00000030053
		ENSDARG00000030139
		ENSDARG00000030155
		ENSDARG00000030213
		ENSDARG00000030241
		ENSDARG00000030270
		ENSDARG00000030408
		ENSDARG00000030441
		ENSDARG00000030479
		ENSDARG00000030537
		ENSDARG00000030602
		ENSDARG00000030694
		ENSDARG00000030700
		ENSDARG00000030716
		ENSDARG00000030949
		ENSDARG00000031164
		ENSDARG00000031261
		ENSDARG00000031293
		ENSDARG00000031317
		ENSDARG00000031388
		ENSDARG00000031427
		ENSDARG00000031434
		ENSDARG00000031435
		ENSDARG00000031495
		ENSDARG00000031511
		ENSDARG00000031683
		ENSDARG00000031776
		ENSDARG00000031795
		ENSDARG00000031819
		ENSDARG00000031981
		ENSDARG00000032102
		ENSDARG00000032103
		ENSDARG00000032129
		ENSDARG00000032175
		ENSDARG00000032242
		ENSDARG00000032296
		ENSDARG00000032317
		ENSDARG00000032405
		ENSDARG00000032575
		ENSDARG00000032606
		ENSDARG00000032619
		ENSDARG00000032651
		ENSDARG00000032725
		ENSDARG00000032765
		ENSDARG00000032866
		ENSDARG00000032963
		ENSDARG00000032970
		ENSDARG00000032997
		ENSDARG00000033009
		ENSDARG00000033172
		ENSDARG00000033175
		ENSDARG00000033179
		ENSDARG00000033364
		ENSDARG00000033450
		ENSDARG00000033466
		ENSDARG00000033539
		ENSDARG00000033597
		ENSDARG00000033609
		ENSDARG00000033655
		ENSDARG00000033683
		ENSDARG00000033738
		ENSDARG00000033789
		ENSDARG00000033855
		ENSDARG00000034013
		ENSDARG00000034189
		ENSDARG00000034195
		ENSDARG00000034240
		ENSDARG00000034291
		ENSDARG00000034427
		ENSDARG00000034470
		ENSDARG00000034572
		ENSDARG00000034616
		ENSDARG00000034670
		ENSDARG00000034753
		ENSDARG00000034777
		ENSDARG00000034897
		ENSDARG00000035018
		ENSDARG00000035043
		ENSDARG00000035066
		ENSDARG00000035129
		ENSDARG00000035136
		ENSDARG00000035282
		ENSDARG00000035325
		ENSDARG00000035327
		ENSDARG00000035329
		ENSDARG00000035400
		ENSDARG00000035427
		ENSDARG00000035519
		ENSDARG00000035559
		ENSDARG00000035596
		ENSDARG00000035622
		ENSDARG00000035625
		ENSDARG00000035634
		ENSDARG00000035678
		ENSDARG00000035679
		ENSDARG00000035692
		ENSDARG00000035694
		ENSDARG00000035699
		ENSDARG00000035715
		ENSDARG00000035751
		ENSDARG00000035809
		ENSDARG00000035858
		ENSDARG00000035859
		ENSDARG00000035860
		ENSDARG00000035871
		ENSDARG00000035914
		ENSDARG00000035958
		ENSDARG00000035993
		ENSDARG00000036036
		ENSDARG00000036080
		ENSDARG00000036107
		ENSDARG00000036161
		ENSDARG00000036162
		ENSDARG00000036190
		ENSDARG00000036298
		ENSDARG00000036299
		ENSDARG00000036316
		ENSDARG00000036329
		ENSDARG00000036371
		ENSDARG00000036386
		ENSDARG00000036427
		ENSDARG00000036489
		ENSDARG00000036510
		ENSDARG00000036558
		ENSDARG00000036625
		ENSDARG00000036629
		ENSDARG00000036675
		ENSDARG00000036684
		ENSDARG00000036754
		ENSDARG00000036832
		ENSDARG00000036834
		ENSDARG00000036855
		ENSDARG00000036875
		ENSDARG00000036894
		ENSDARG00000036995
		ENSDARG00000037009
		ENSDARG00000037038
		ENSDARG00000037071
		ENSDARG00000037108
		ENSDARG00000037153
		ENSDARG00000037177
		ENSDARG00000037188
		ENSDARG00000037229
		ENSDARG00000037259
		ENSDARG00000037284
		ENSDARG00000037318
		ENSDARG00000037350
		ENSDARG00000037361
		ENSDARG00000037392
		ENSDARG00000037397
		ENSDARG00000037410
		ENSDARG00000037488
		ENSDARG00000037503
		ENSDARG00000037559
		ENSDARG00000037640
		ENSDARG00000037675
		ENSDARG00000037746
		ENSDARG00000037789
		ENSDARG00000037790
		ENSDARG00000037846
		ENSDARG00000037860
		ENSDARG00000037867
		ENSDARG00000037870
		ENSDARG00000037879
		ENSDARG00000037919
		ENSDARG00000037928
		ENSDARG00000037962
		ENSDARG00000037965
		ENSDARG00000037980
		ENSDARG00000037997
		ENSDARG00000037998
		ENSDARG00000038028
		ENSDARG00000038030
		ENSDARG00000038066
		ENSDARG00000038068
		ENSDARG00000038075
		ENSDARG00000038076
		ENSDARG00000038141
		ENSDARG00000038147
		ENSDARG00000038205
		ENSDARG00000038505
		ENSDARG00000038559
		ENSDARG00000038576
		ENSDARG00000038577
		ENSDARG00000038608
		ENSDARG00000038635
		ENSDARG00000038695
		ENSDARG00000038754
		ENSDARG00000038768
		ENSDARG00000038785
		ENSDARG00000038835
		ENSDARG00000038882
		ENSDARG00000038954
		ENSDARG00000039005
		ENSDARG00000039007
		ENSDARG00000039034
		ENSDARG00000039041
		ENSDARG00000039099
		ENSDARG00000039117
		ENSDARG00000039142
		ENSDARG00000039150
		ENSDARG00000039162
		ENSDARG00000039185
		ENSDARG00000039208
		ENSDARG00000039268
		ENSDARG00000039338
		ENSDARG00000039345
		ENSDARG00000039346
		ENSDARG00000039347
		ENSDARG00000039424
		ENSDARG00000039429
		ENSDARG00000039493
		ENSDARG00000039543
		ENSDARG00000039576
		ENSDARG00000039578
		ENSDARG00000039601
		ENSDARG00000039830
		ENSDARG00000039880
		ENSDARG00000039882
		ENSDARG00000039887
		ENSDARG00000039914
		ENSDARG00000039958
		ENSDARG00000039969
		ENSDARG00000039980
		ENSDARG00000040031
		ENSDARG00000040039
		ENSDARG00000040041
		ENSDARG00000040072
		ENSDARG00000040076
		ENSDARG00000040121
		ENSDARG00000040158
		ENSDARG00000040184
		ENSDARG00000040190
		ENSDARG00000040245
		ENSDARG00000040287
		ENSDARG00000040314
		ENSDARG00000040439
		ENSDARG00000040440
		ENSDARG00000040443
		ENSDARG00000040503
		ENSDARG00000040534
		ENSDARG00000040557
		ENSDARG00000040564
		ENSDARG00000040565
		ENSDARG00000040666
		ENSDARG00000040713
		ENSDARG00000040764
		ENSDARG00000040822
		ENSDARG00000040864
		ENSDARG00000040988
		ENSDARG00000041051
		ENSDARG00000041065
		ENSDARG00000041155
		ENSDARG00000041182
		ENSDARG00000041203
		ENSDARG00000041232
		ENSDARG00000041306
		ENSDARG00000041314
		ENSDARG00000041332
		ENSDARG00000041363
		ENSDARG00000041391
		ENSDARG00000041400
		ENSDARG00000041435
		ENSDARG00000041450
		ENSDARG00000041530
		ENSDARG00000041607
		ENSDARG00000041619
		ENSDARG00000041623
		ENSDARG00000041691
		ENSDARG00000041723
		ENSDARG00000041811
		ENSDARG00000041875
		ENSDARG00000041887
		ENSDARG00000041895
		ENSDARG00000041921
		ENSDARG00000041974
		ENSDARG00000042214
		ENSDARG00000042236
		ENSDARG00000042245
		ENSDARG00000042252
		ENSDARG00000042319
		ENSDARG00000042337
		ENSDARG00000042428
		ENSDARG00000042458
		ENSDARG00000042469
		ENSDARG00000042484
		ENSDARG00000042492
		ENSDARG00000042520
		ENSDARG00000042533
		ENSDARG00000042535
		ENSDARG00000042539
		ENSDARG00000042566
		ENSDARG00000042620
		ENSDARG00000042642
		ENSDARG00000042660
		ENSDARG00000042708
		ENSDARG00000042777
		ENSDARG00000042823
		ENSDARG00000042835
		ENSDARG00000042864
		ENSDARG00000042876
		ENSDARG00000042905
		ENSDARG00000042927
		ENSDARG00000042933
		ENSDARG00000042993
		ENSDARG00000043128
		ENSDARG00000043137
		ENSDARG00000043154
		ENSDARG00000043257
		ENSDARG00000043304
		ENSDARG00000043371
		ENSDARG00000043453
		ENSDARG00000043457
		ENSDARG00000043467
		ENSDARG00000043484
		ENSDARG00000043485
		ENSDARG00000043493
		ENSDARG00000043502
		ENSDARG00000043509
		ENSDARG00000043511
		ENSDARG00000043531
		ENSDARG00000043608
		ENSDARG00000043631
		ENSDARG00000043665
		ENSDARG00000043713
		ENSDARG00000043716
		ENSDARG00000043732
		ENSDARG00000043795
		ENSDARG00000043848
		ENSDARG00000043857
		ENSDARG00000043865
		ENSDARG00000043873
		ENSDARG00000043960
		ENSDARG00000043976
		ENSDARG00000044001
		ENSDARG00000044092
		ENSDARG00000044093
		ENSDARG00000044102
		ENSDARG00000044125
		ENSDARG00000044182
		ENSDARG00000044267
		ENSDARG00000044299
		ENSDARG00000044301
		ENSDARG00000044332
		ENSDARG00000044402
		ENSDARG00000044431
		ENSDARG00000044521
		ENSDARG00000044540
		ENSDARG00000044562
		ENSDARG00000044565
		ENSDARG00000044573
		ENSDARG00000044601
		ENSDARG00000044669
		ENSDARG00000044684
		ENSDARG00000044811
		ENSDARG00000044820
		ENSDARG00000044852
		ENSDARG00000045132
		ENSDARG00000045146
		ENSDARG00000045155
		ENSDARG00000045167
		ENSDARG00000045230
		ENSDARG00000045248
		ENSDARG00000045296
		ENSDARG00000045351
		ENSDARG00000045352
		ENSDARG00000045359
		ENSDARG00000045367
		ENSDARG00000045372
		ENSDARG00000045373
		ENSDARG00000045399
		ENSDARG00000045402
		ENSDARG00000045487
		ENSDARG00000045490
		ENSDARG00000045513
		ENSDARG00000045514
		ENSDARG00000045618
		ENSDARG00000045773
		ENSDARG00000045776
		ENSDARG00000045843
		ENSDARG00000045874
		ENSDARG00000045877
		ENSDARG00000045913
		ENSDARG00000045914
		ENSDARG00000045928
		ENSDARG00000045978
		ENSDARG00000046022
		ENSDARG00000046030
		ENSDARG00000046106
		ENSDARG00000046132
		ENSDARG00000046157
		ENSDARG00000051783
		ENSDARG00000051800
		ENSDARG00000051886
		ENSDARG00000051923
		ENSDARG00000051957
		ENSDARG00000052061
		ENSDARG00000052063
		ENSDARG00000052073
		ENSDARG00000052082
		ENSDARG00000052139
		ENSDARG00000052150
		ENSDARG00000052178
		ENSDARG00000052304
		ENSDARG00000052348
		ENSDARG00000052480
		ENSDARG00000052536
		ENSDARG00000052641
		ENSDARG00000052649
		ENSDARG00000052674
		ENSDARG00000052695
		ENSDARG00000052712
		ENSDARG00000052721
		ENSDARG00000052728
		ENSDARG00000052746
		ENSDARG00000052840
		ENSDARG00000052842
		ENSDARG00000052856
		ENSDARG00000052907
		ENSDARG00000052928
		ENSDARG00000052975
		ENSDARG00000053047
		ENSDARG00000053058
		ENSDARG00000053129
		ENSDARG00000053217
		ENSDARG00000053254
		ENSDARG00000053291
		ENSDARG00000053365
		ENSDARG00000053381
		ENSDARG00000053395
		ENSDARG00000053446
		ENSDARG00000053457
		ENSDARG00000053468
		ENSDARG00000053485
		ENSDARG00000053496
		ENSDARG00000053569
		ENSDARG00000053668
		ENSDARG00000053684
		ENSDARG00000053810
		ENSDARG00000053912
		ENSDARG00000053990
		ENSDARG00000054010
		ENSDARG00000054058
		ENSDARG00000054063
		ENSDARG00000054154
		ENSDARG00000054155
		ENSDARG00000054172
		ENSDARG00000054271
		ENSDARG00000054272
		ENSDARG00000054290
		ENSDARG00000054560
		ENSDARG00000054562
		ENSDARG00000054578
		ENSDARG00000054616
		ENSDARG00000054696
		ENSDARG00000054793
		ENSDARG00000054804
		ENSDARG00000054818
		ENSDARG00000054823
		ENSDARG00000054906
		ENSDARG00000054907
		ENSDARG00000054911
		ENSDARG00000054980
		ENSDARG00000055080
		ENSDARG00000055115
		ENSDARG00000055120
		ENSDARG00000055133
		ENSDARG00000055216
		ENSDARG00000055283
		ENSDARG00000055360
		ENSDARG00000055389
		ENSDARG00000055455
		ENSDARG00000055475
		ENSDARG00000055514
		ENSDARG00000055524
		ENSDARG00000055536
		ENSDARG00000055618
		ENSDARG00000055678
		ENSDARG00000055708
		ENSDARG00000055753
		ENSDARG00000055868
		ENSDARG00000055900
		ENSDARG00000055903
		ENSDARG00000055945
		ENSDARG00000055969
		ENSDARG00000055996
		ENSDARG00000056008
		ENSDARG00000056059
		ENSDARG00000056085
		ENSDARG00000056090
		ENSDARG00000056119
		ENSDARG00000056138
		ENSDARG00000056151
		ENSDARG00000056160
		ENSDARG00000056167
		ENSDARG00000056186
		ENSDARG00000056233
		ENSDARG00000056235
		ENSDARG00000056307
		ENSDARG00000056338
		ENSDARG00000056379
		ENSDARG00000056414
		ENSDARG00000056438
		ENSDARG00000056480
		ENSDARG00000056481
		ENSDARG00000056531
		ENSDARG00000056549
		ENSDARG00000056582
		ENSDARG00000056583
		ENSDARG00000056621
		ENSDARG00000056649
		ENSDARG00000056722
		ENSDARG00000056725
		ENSDARG00000056729
		ENSDARG00000056732
		ENSDARG00000056740
		ENSDARG00000056765
		ENSDARG00000056903
		ENSDARG00000057007
		ENSDARG00000057026
		ENSDARG00000057075
		ENSDARG00000057114
		ENSDARG00000057167
		ENSDARG00000057299
		ENSDARG00000057303
		ENSDARG00000057414
		ENSDARG00000057484
		ENSDARG00000057556
		ENSDARG00000057575
		ENSDARG00000057624
		ENSDARG00000057676
		ENSDARG00000057683
		ENSDARG00000057691
		ENSDARG00000057698
		ENSDARG00000057738
		ENSDARG00000057782
		ENSDARG00000057853
		ENSDARG00000057854
		ENSDARG00000057867
		ENSDARG00000057882
		ENSDARG00000057912
		ENSDARG00000057940
		ENSDARG00000058041
		ENSDARG00000058044
		ENSDARG00000058062
		ENSDARG00000058105
		ENSDARG00000058128
		ENSDARG00000058203
		ENSDARG00000058225
		ENSDARG00000058230
		ENSDARG00000058292
		ENSDARG00000058297
		ENSDARG00000058328
		ENSDARG00000058349
		ENSDARG00000058358
		ENSDARG00000058369
		ENSDARG00000058371
		ENSDARG00000058451
		ENSDARG00000058454
		ENSDARG00000058463
		ENSDARG00000058467
		ENSDARG00000058471
		ENSDARG00000058479
		ENSDARG00000058504
		ENSDARG00000058538
		ENSDARG00000058560
		ENSDARG00000058593
		ENSDARG00000058606
		ENSDARG00000058656
		ENSDARG00000058729
		ENSDARG00000058734
		ENSDARG00000059070
		ENSDARG00000059075
		ENSDARG00000059128
		ENSDARG00000059177
		ENSDARG00000059298
		ENSDARG00000059303
		ENSDARG00000059304
		ENSDARG00000059308
		ENSDARG00000059323
		ENSDARG00000059337
		ENSDARG00000059357
		ENSDARG00000059360
		ENSDARG00000059367
		ENSDARG00000059373
		ENSDARG00000059398
		ENSDARG00000059646
		ENSDARG00000059654
		ENSDARG00000059680
		ENSDARG00000059725
		ENSDARG00000059816
		ENSDARG00000059906
		ENSDARG00000059908
		ENSDARG00000060004
		ENSDARG00000060036
		ENSDARG00000060041
		ENSDARG00000060065
		ENSDARG00000060115
		ENSDARG00000060150
		ENSDARG00000060199
		ENSDARG00000060457
		ENSDARG00000060489
		ENSDARG00000060679
		ENSDARG00000060682
		ENSDARG00000060695
		ENSDARG00000060697
		ENSDARG00000060756
		ENSDARG00000061052
		ENSDARG00000061100
		ENSDARG00000061187
		ENSDARG00000061228
		ENSDARG00000061338
		ENSDARG00000061478
		ENSDARG00000061490
		ENSDARG00000061764
		ENSDARG00000061774
		ENSDARG00000061810
		ENSDARG00000061854
		ENSDARG00000062152
		ENSDARG00000062326
		ENSDARG00000062338
		ENSDARG00000062590
		ENSDARG00000062592
		ENSDARG00000062646
		ENSDARG00000062948
		ENSDARG00000063095
		ENSDARG00000063100
		ENSDARG00000063145
		ENSDARG00000063177
		ENSDARG00000063341
		ENSDARG00000063535
		ENSDARG00000063572
		ENSDARG00000063626
		ENSDARG00000063895
		ENSDARG00000063899
		ENSDARG00000063905
		ENSDARG00000063908
		ENSDARG00000063911
		ENSDARG00000063912
		ENSDARG00000063914
		ENSDARG00000063917
		ENSDARG00000063921
		ENSDARG00000063922
		ENSDARG00000063924
		ENSDARG00000067717
		ENSDARG00000067975
		ENSDARG00000067990
		ENSDARG00000067997
		ENSDARG00000068123
		ENSDARG00000068214
		ENSDARG00000068265
		ENSDARG00000068289
		ENSDARG00000068305
		ENSDARG00000068401
		ENSDARG00000068404
		ENSDARG00000068432
		ENSDARG00000068434
		ENSDARG00000068436
		ENSDARG00000068457
		ENSDARG00000068582
		ENSDARG00000068629
		ENSDARG00000068640
		ENSDARG00000068641
		ENSDARG00000068698
		ENSDARG00000068820
		ENSDARG00000068940
		ENSDARG00000068978
		ENSDARG00000068992
		ENSDARG00000068995
		ENSDARG00000068996
		ENSDARG00000069013
		ENSDARG00000069056
		ENSDARG00000069065
		ENSDARG00000069090
		ENSDARG00000069093
		ENSDARG00000069100
		ENSDARG00000069116
		ENSDARG00000069142
		ENSDARG00000069289
		ENSDARG00000069422
		ENSDARG00000069432
		ENSDARG00000069461
		ENSDARG00000069521
		ENSDARG00000069619
		ENSDARG00000069624
		ENSDARG00000069850
		ENSDARG00000069853
		ENSDARG00000069855
		ENSDARG00000069910
		ENSDARG00000069920
		ENSDARG00000069977
		ENSDARG00000070019
		ENSDARG00000070046
		ENSDARG00000070083
		ENSDARG00000070155
		ENSDARG00000070161
		ENSDARG00000070386
		ENSDARG00000070426
		ENSDARG00000070437
		ENSDARG00000070472
		ENSDARG00000070475
		ENSDARG00000070545
		ENSDARG00000070607
		ENSDARG00000070623
		ENSDARG00000070656
		ENSDARG00000070657
		ENSDARG00000070674
		ENSDARG00000070688
		ENSDARG00000070721
		ENSDARG00000070770
		ENSDARG00000070824
		ENSDARG00000070828
		ENSDARG00000070833
		ENSDARG00000070834
		ENSDARG00000070835
		ENSDARG00000070844
		ENSDARG00000070849
		ENSDARG00000070866
		ENSDARG00000070867
		ENSDARG00000070922
		ENSDARG00000070959
		ENSDARG00000070985
		ENSDARG00000071060
		ENSDARG00000071196
		ENSDARG00000071224
		ENSDARG00000071336
		ENSDARG00000071396
		ENSDARG00000071403
		ENSDARG00000071426
		ENSDARG00000071468
		ENSDARG00000071566
		ENSDARG00000071573
		ENSDARG00000071658
		ENSDARG00000071670
		ENSDARG00000071679
		ENSDARG00000071691
		ENSDARG00000071878
		ENSDARG00000073710
		ENSDARG00000073742
		ENSDARG00000073944
		ENSDARG00000073978
		ENSDARG00000074030
		ENSDARG00000074057
		ENSDARG00000074201
		ENSDARG00000074242
		ENSDARG00000074246
		ENSDARG00000074266
		ENSDARG00000074335
		ENSDARG00000074340
		ENSDARG00000074378
		ENSDARG00000074552
		ENSDARG00000074572
		ENSDARG00000074667
		ENSDARG00000074758
		ENSDARG00000074790
		ENSDARG00000074849
		ENSDARG00000074979
		ENSDARG00000074985
		ENSDARG00000075211
		ENSDARG00000075380
		ENSDARG00000075445
		ENSDARG00000075508
		ENSDARG00000075542
		ENSDARG00000075559
		ENSDARG00000075560
		ENSDARG00000075593
		ENSDARG00000075621
		ENSDARG00000075622
		ENSDARG00000075709
		ENSDARG00000075758
		ENSDARG00000075768
		ENSDARG00000075795
		ENSDARG00000075883
		ENSDARG00000075989
		ENSDARG00000076120
		ENSDARG00000076126
		ENSDARG00000076223
		ENSDARG00000076283
		ENSDARG00000076290
		ENSDARG00000076321
		ENSDARG00000076439
		ENSDARG00000076486
		ENSDARG00000076509
		ENSDARG00000076526
		ENSDARG00000076532
		ENSDARG00000076568
		ENSDARG00000076659
		ENSDARG00000076667
		ENSDARG00000076799
		ENSDARG00000076815
		ENSDARG00000076836
		ENSDARG00000076847
		ENSDARG00000076966
		ENSDARG00000077082
		ENSDARG00000077121
		ENSDARG00000077126
		ENSDARG00000077226
		ENSDARG00000077256
		ENSDARG00000077264
		ENSDARG00000077291
		ENSDARG00000077360
		ENSDARG00000077405
		ENSDARG00000077456
		ENSDARG00000077499
		ENSDARG00000077533
		ENSDARG00000077620
		ENSDARG00000077653
		ENSDARG00000077664
		ENSDARG00000077717
		ENSDARG00000077732
		ENSDARG00000077776
		ENSDARG00000077777
		ENSDARG00000077811
		ENSDARG00000077815
		ENSDARG00000077870
		ENSDARG00000078069
		ENSDARG00000078118
		ENSDARG00000078164
		ENSDARG00000078214
		ENSDARG00000078383
		ENSDARG00000078386
		ENSDARG00000078473
		ENSDARG00000078619
		ENSDARG00000078654
		ENSDARG00000078748
		ENSDARG00000078785
		ENSDARG00000078865
		ENSDARG00000078904
		ENSDARG00000079150
		ENSDARG00000079274
		ENSDARG00000079305
		ENSDARG00000079313
		ENSDARG00000079391
		ENSDARG00000079632
		ENSDARG00000079687
		ENSDARG00000079688
		ENSDARG00000079823
		ENSDARG00000079848
		ENSDARG00000079949
		ENSDARG00000080010
		ENSDARG00000086411
		ENSDARG00000086416
		ENSDARG00000086618
		ENSDARG00000086699
		ENSDARG00000086842
		ENSDARG00000086881
		ENSDARG00000087093
		ENSDARG00000087303
		ENSDARG00000087390
		ENSDARG00000087443
		ENSDARG00000087554
		ENSDARG00000087555
		ENSDARG00000087636
		ENSDARG00000087640
		ENSDARG00000087647
		ENSDARG00000087693
		ENSDARG00000087897
		ENSDARG00000088030
		ENSDARG00000088087
		ENSDARG00000088091
		ENSDARG00000088178
		ENSDARG00000088318
		ENSDARG00000088330
		ENSDARG00000088383
		ENSDARG00000088711
		ENSDARG00000088984
		ENSDARG00000089124
		ENSDARG00000089204
		ENSDARG00000089302
		ENSDARG00000089382
		ENSDARG00000089475
		ENSDARG00000089626
		ENSDARG00000089637
		ENSDARG00000089663
		ENSDARG00000089681
		ENSDARG00000089769
		ENSDARG00000089787
		ENSDARG00000089836
		ENSDARG00000089976
		ENSDARG00000090194
		ENSDARG00000090228
		ENSDARG00000090268
		ENSDARG00000090386
		ENSDARG00000090389
		ENSDARG00000090428
		ENSDARG00000090454
		ENSDARG00000090462
		ENSDARG00000090552
		ENSDARG00000090697
		ENSDARG00000090788
		ENSDARG00000090872
		ENSDARG00000090912
		ENSDARG00000091001
		ENSDARG00000091079
		ENSDARG00000091150
		ENSDARG00000091298
		ENSDARG00000091348
		ENSDARG00000091563
		ENSDARG00000091656
		ENSDARG00000091831
		ENSDARG00000091931
		ENSDARG00000092112
		ENSDARG00000092115
		ENSDARG00000092136
		ENSDARG00000092467
		ENSDARG00000092546
		ENSDARG00000092553
		ENSDARG00000092677
		ENSDARG00000092693
		ENSDARG00000092798
		ENSDARG00000092807
		ENSDARG00000092873
		ENSDARG00000092895
		ENSDARG00000092947
		ENSDARG00000092954
		ENSDARG00000093022
		ENSDARG00000093058
		ENSDARG00000093156
		ENSDARG00000093313
		ENSDARG00000093406
		ENSDARG00000093448
		ENSDARG00000093484
		ENSDARG00000093503
		ENSDARG00000093549
		ENSDARG00000093584
		ENSDARG00000093622
		ENSDARG00000093945
		ENSDARG00000094041
		ENSDARG00000094210
		ENSDARG00000094300
		ENSDARG00000094426
		ENSDARG00000094673
		ENSDARG00000094695
		ENSDARG00000094833
		ENSDARG00000095273
		ENSDARG00000095451
		ENSDARG00000095743
		ENSDARG00000095796
		ENSDARG00000095896
		ENSDARG00000095897
		ENSDARG00000095908
		ENSDARG00000096003
		ENSDARG00000096118
		ENSDARG00000096257
		ENSDARG00000096631
		ENSDARG00000096661
		ENSDARG00000096711
		ENSDARG00000096849
		ENSDARG00000097057
		ENSDARG00000097102
		ENSDARG00000097445
		ENSDARG00000097478
		ENSDARG00000097691
		ENSDARG00000097753
		ENSDARG00000097797
		ENSDARG00000098059
		ENSDARG00000098221
		ENSDARG00000098228
		ENSDARG00000098334
		ENSDARG00000098355
		ENSDARG00000098466
		ENSDARG00000098507
		ENSDARG00000098574
		ENSDARG00000098589
		ENSDARG00000098591
		ENSDARG00000098627
		ENSDARG00000098635
		ENSDARG00000098671
		ENSDARG00000098783
		ENSDARG00000098785
		ENSDARG00000098832
		ENSDARG00000098852
		ENSDARG00000098935
		ENSDARG00000098992
		ENSDARG00000099022
		ENSDARG00000099039
		ENSDARG00000099101
		ENSDARG00000099104
		ENSDARG00000099148
		ENSDARG00000099175
		ENSDARG00000099184
		ENSDARG00000099194
		ENSDARG00000099195
		ENSDARG00000099197
		ENSDARG00000099236
		ENSDARG00000099241
		ENSDARG00000099281
		ENSDARG00000099283
		ENSDARG00000099306
		ENSDARG00000099312
		ENSDARG00000099380
		ENSDARG00000099420
		ENSDARG00000099439
		ENSDARG00000099453
		ENSDARG00000099499
		ENSDARG00000099572
		ENSDARG00000099624
		ENSDARG00000099635
		ENSDARG00000099640
		ENSDARG00000099663
		ENSDARG00000099664
		ENSDARG00000099667
		ENSDARG00000099675
		ENSDARG00000099744
		ENSDARG00000099766
		ENSDARG00000099776
		ENSDARG00000099865
		ENSDARG00000099959
		ENSDARG00000099966
		ENSDARG00000100003
		ENSDARG00000100020
		ENSDARG00000100095
		ENSDARG00000100129
		ENSDARG00000100209
		ENSDARG00000100363
		ENSDARG00000100371
		ENSDARG00000100374
		ENSDARG00000100392
		ENSDARG00000100446
		ENSDARG00000100452
		ENSDARG00000100513
		ENSDARG00000100514
		ENSDARG00000100515
		ENSDARG00000100553
		ENSDARG00000100558
		ENSDARG00000100582
		ENSDARG00000100585
		ENSDARG00000100588
		ENSDARG00000100741
		ENSDARG00000100742
		ENSDARG00000100826
		ENSDARG00000100990
		ENSDARG00000101009
		ENSDARG00000101037
		ENSDARG00000101082
		ENSDARG00000101127
		ENSDARG00000101161
		ENSDARG00000101199
		ENSDARG00000101216
		ENSDARG00000101324
		ENSDARG00000101362
		ENSDARG00000101406
		ENSDARG00000101481
		ENSDARG00000101560
		ENSDARG00000101619
		ENSDARG00000101624
		ENSDARG00000101626
		ENSDARG00000101631
		ENSDARG00000101637
		ENSDARG00000101707
		ENSDARG00000101733
		ENSDARG00000101744
		ENSDARG00000101766
		ENSDARG00000101794
		ENSDARG00000101808
		ENSDARG00000101813
		ENSDARG00000101844
		ENSDARG00000101900
		ENSDARG00000101915
		ENSDARG00000102051
		ENSDARG00000102105
		ENSDARG00000102115
		ENSDARG00000102291
		ENSDARG00000102317
		ENSDARG00000102320
		ENSDARG00000102417
		ENSDARG00000102452
		ENSDARG00000102482
		ENSDARG00000102558
		ENSDARG00000102571
		ENSDARG00000102624
		ENSDARG00000102632
		ENSDARG00000102640
		ENSDARG00000102741
		ENSDARG00000102744
		ENSDARG00000102798
		ENSDARG00000102808
		ENSDARG00000102832
		ENSDARG00000102879
		ENSDARG00000102889
		ENSDARG00000102978
		ENSDARG00000103007
		ENSDARG00000103057
		ENSDARG00000103101
		ENSDARG00000103163
		ENSDARG00000103316
		ENSDARG00000103337
		ENSDARG00000103364
		ENSDARG00000103403
		ENSDARG00000103404
		ENSDARG00000103422
		ENSDARG00000103433
		ENSDARG00000103443
		ENSDARG00000103476
		ENSDARG00000103554
		ENSDARG00000103566
		ENSDARG00000103594
		ENSDARG00000103672
		ENSDARG00000103718
		ENSDARG00000103720
		ENSDARG00000103732
		ENSDARG00000103740
		ENSDARG00000103747
		ENSDARG00000103754
		ENSDARG00000103791
		ENSDARG00000103799
		ENSDARG00000103824
		ENSDARG00000103845
		ENSDARG00000103846
		ENSDARG00000103919
		ENSDARG00000103979
		ENSDARG00000103994
		ENSDARG00000104011
		ENSDARG00000104018
		ENSDARG00000104030
		ENSDARG00000104031
		ENSDARG00000104066
		ENSDARG00000104068
		ENSDARG00000104071
		ENSDARG00000104173
		ENSDARG00000104178
		ENSDARG00000104181
		ENSDARG00000104227
		ENSDARG00000104267
		ENSDARG00000104279
		ENSDARG00000104353
		ENSDARG00000104359
		ENSDARG00000104372
		ENSDARG00000104431
		ENSDARG00000104451
		ENSDARG00000104458
		ENSDARG00000104517
		ENSDARG00000104530
		ENSDARG00000104537
		ENSDARG00000104674
		ENSDARG00000104682
		ENSDARG00000104708
		ENSDARG00000104726
		ENSDARG00000104782
		ENSDARG00000104837
		ENSDARG00000104889
		ENSDARG00000104901
		ENSDARG00000104938
		ENSDARG00000105018
		ENSDARG00000105037
		ENSDARG00000105116
		ENSDARG00000105177
		ENSDARG00000105223
		ENSDARG00000105231
		ENSDARG00000105293
		ENSDARG00000105412
		ENSDARG00000106529
		ENSDARG00000109373
		ENSDARG00000109510
		ENSDARG00000110357
		ENSDARG00000110608
		ENSDARG00000110836
		ENSDARG00000111939
		ENSDARG00000112476
		ENSDARG00000112959
		ENSDARG00000113599
		ENSDARG00000113969
		ENSDARG00000114516
		ENSDARG00000114670
		ENSDARG00000115271
		ENSDARG00000115281
		ENSDARG00000115405
		ENSDARG00000115557
		ENSDARG00000115644
		ENSDARG00000116058
		ENSDARG00000116491
		ENSDARG00000116617
		ENSDARG00000116649
		ENSDARG00000116743

## Sheet: Table S2. Gene expression list
Zebrafish Atlas (Farnsworth et al. Dev. Biology 2020)												Human healthy melanocytes (GSE135922)
pmel+_24hpf_dataset		pmel-_24hpf_dataset		pmel+_48hpf_dataset		pmel-_48hpf_dataset		pmel+_120hpf_dataset		pmel-_120hpf_dataset		Extracted uveal melanocytes
#cells = 659	Sum counts	#cells =643	Sum counts	#cells = 224	Sum counts	#cells = 132	Sum counts	#cells = 194	Sum counts	#cells = 365	Sum counts	# cells= 514	Sum counts
ENSDARG00000088330	42711	ENSDARG00000092807	32873	ENSDARG00000002311	22142	ENSDARG00000104068	13148.5	ENSDARG00000044684	12717	ENSDARG00000092807	30506	MALAT1	124566
ENSDARG00000092807	41851	ENSDARG00000020850	17159	ENSDARG00000092807	15401	ENSDARG00000056151	11330.3	ENSDARG00000098724	9983	ENSDARG00000009978	19086	MT-CO3	48530
ENSDARG00000087390	37692	ENSDARG00000021864	16833	ENSDARG00000056151	8747	ENSDARG00000092807	9155.42	ENSDARG00000007480	9655	ENSDARG00000056151	15248	MT-CO1	46692
ENSDARG00000038147	24316	ENSDARG00000043509	16651	ENSDARG00000077291	7398	ENSDARG00000091298	8247.82	ENSDARG00000063908	7472	ENSDARG00000021864	14827	FTH1	36062
ENSDARG00000020850	21609	ENSDARG00000077291	16300	ENSDARG00000021864	7255	ENSDARG00000006008	7450.99	ENSDARG00000101481	6377	ENSDARG00000058105	14681	MT-ND3	33303
ENSDARG00000021864	21430	ENSDARG00000017624	16264	ENSDARG00000043509	6999	ENSDARG00000036875	4573.33	ENSDARG00000045808	5989	ENSDARG00000009212	14574	EEF1A1	32787
ENSDARG00000077291	21039	ENSDARG00000054818	15362	ENSDARG00000006008	6831	ENSDARG00000063908	4571.45	ENSDARG00000054890	4514	ENSDARG00000030602	14408	RPLP1	31519
ENSDARG00000043509	20766	ENSDARG00000036875	14222	ENSDARG00000030602	6385	ENSDARG00000021864	4505.51	ENSDARG00000063912	4322	ENSDARG00000054818	14293	MT-CO2	31399
ENSDARG00000054818	19547	ENSDARG00000042566	14125	ENSDARG00000020850	6356	ENSDARG00000077777	4286.79	ENSDARG00000077652	3818	ENSDARG00000077291	13787	MT-CYB	30234
ENSDARG00000079305	19371	ENSDARG00000010160	13494	ENSDARG00000010160	6336	ENSDARG00000020850	4145.09	ENSDARG00000063911	3565	ENSDARG00000020850	13763	MT-ATP6	30232
ENSDARG00000017624	19010	ENSDARG00000030602	13409	ENSDARG00000063908	6284	ENSDARG00000043509	4142.36	ENSDARG00000008306	3301	ENSDARG00000010160	13538	RPL41	28253
ENSDARG00000042566	18634	ENSDARG00000019230	13062	ENSDARG00000036875	6223	ENSDARG00000037870	4041.48	ENSDARG00000051874	3255	ENSDARG00000043509	13499	VIM	25824
ENSDARG00000115405	17877	ENSDARG00000051783	12927	ENSDARG00000054818	6069	ENSDARG00000030602	3938.44	ENSDARG00000059163	3098	ENSDARG00000036875	13017	MT-ND4	22024
ENSDARG00000036875	17716	ENSDARG00000013307	12541	ENSDARG00000042566	5538	ENSDARG00000054818	3912.27	ENSDARG00000063924	2902	ENSDARG00000036316	12939	RPL13	18784
ENSDARG00000010160	17575	ENSDARG00000007320	12415	ENSDARG00000036316	5492	ENSDARG00000010160	3833.02	ENSDARG00000092807	2743	ENSDARG00000053457	12804	RPS12	18149
ENSDARG00000030602	17223	ENSDARG00000025073	12349	ENSDARG00000025073	5463	ENSDARG00000099104	3811.09	ENSDARG00000006008	2705	ENSDARG00000102317	12025	MT-ND1	17272
ENSDARG00000051783	16973	ENSDARG00000102317	12202	ENSDARG00000013307	5232	ENSDARG00000058105	3762.22	ENSDARG00000057698	2612	ENSDARG00000034291	11954	RPL10	16646
ENSDARG00000019230	16458	ENSDARG00000029533	11753	ENSDARG00000029533	5200	ENSDARG00000025254	3761.7	ENSDARG00000009212	2543	ENSDARG00000037870	11751	RPS27	16264
ENSDARG00000007320	16055	ENSDARG00000011405	11498	ENSDARG00000007320	5127	ENSDARG00000099101	3702.57	ENSDARG00000063905	2349	ENSDARG00000115271	11527	TPT1	16154
ENSDARG00000102317	15979	ENSDARG00000014867	11445	ENSDARG00000034291	4995	ENSDARG00000051783	3665.22	ENSDARG00000020850	2301	ENSDARG00000099104	11473	ACTG1	16097
ENSDARG00000025073	15951	ENSDARG00000011201	11305	ENSDARG00000102317	4971	ENSDARG00000006691	3610.38	ENSDARG00000007275	2227	ENSDARG00000042566	11456	FTL	15768
ENSDARG00000013307	15545	ENSDARG00000019181	11291	ENSDARG00000053457	4946	ENSDARG00000102051	3587.19	ENSDARG00000091298	2164	ENSDARG00000029533	11352	RPL37A	15548
ENSDARG00000014867	15202	ENSDARG00000029150	11025	ENSDARG00000092553	4943	ENSDARG00000077291	3526.05	ENSDARG00000056151	2094	ENSDARG00000006691	11279	CRYAB	15271
ENSDARG00000029533	14880	ENSDARG00000009285	10681	ENSDARG00000014867	4933	ENSDARG00000024540	3521.51	ENSDARG00000015050	1775	ENSDARG00000018334	11263	RPS18	14525
ENSDARG00000011405	14810	ENSDARG00000053457	10494	ENSDARG00000019230	4926	ENSDARG00000025073	3503.54	ENSDARG00000037870	1698	ENSDARG00000013307	11049	RPS3A	13952
ENSDARG00000011201	14407	ENSDARG00000019778	10474	ENSDARG00000051783	4871	ENSDARG00000009212	3500.76	ENSDARG00000068992	1678	ENSDARG00000051783	10641	JUND	13685
ENSDARG00000009285	14236	ENSDARG00000014690	10063	ENSDARG00000011201	4772	ENSDARG00000011201	3492.58	ENSDARG00000099101	1672	ENSDARG00000007320	10481	RPL32	13386
ENSDARG00000019181	14188	ENSDARG00000092947	9873	ENSDARG00000019181	4765	ENSDARG00000029533	3449.84	ENSDARG00000036316	1514	ENSDARG00000025073	10415	RPS27A	13340
ENSDARG00000092947	13622	ENSDARG00000025581	9568	ENSDARG00000009285	4634	ENSDARG00000034291	3401.08	ENSDARG00000030602	1485	ENSDARG00000070849	10384	RPL34	13283
ENSDARG00000019778	13134	ENSDARG00000099380	9529	ENSDARG00000011405	4602	ENSDARG00000036316	3343.38	ENSDARG00000092553	1452	ENSDARG00000041232	10254	RPS6	13186
ENSDARG00000053457	13111	ENSDARG00000055996	9511	ENSDARG00000019778	4453	ENSDARG00000009978	3253.97	ENSDARG00000021864	1384	ENSDARG00000039347	10186	RPL3	12979
ENSDARG00000014690	12877	ENSDARG00000003599	9326	ENSDARG00000023298	4170	ENSDARG00000053457	3238.3	ENSDARG00000101406	1363	ENSDARG00000091298	9802	EIF1	12920
ENSDARG00000029150	12487	ENSDARG00000036832	9161	ENSDARG00000035860	4154	ENSDARG00000115271	3224.94	ENSDARG00000054818	1355	ENSDARG00000063908	9741	PMEL	12816
ENSDARG00000025581	12445	ENSDARG00000099572	9017	ENSDARG00000092693	4144	ENSDARG00000042566	3152.43	ENSDARG00000010160	1317	ENSDARG00000032725	9657	RPS28	12426
ENSDARG00000036832	12226	ENSDARG00000035692	8987	ENSDARG00000029150	4107	ENSDARG00000013307	3145.38	ENSDARG00000040039	1287	ENSDARG00000057556	9640	RPL37	12418
ENSDARG00000055996	12041	ENSDARG00000042905	8884	ENSDARG00000091298	4047	ENSDARG00000070849	3069.78	ENSDARG00000102051	1205	ENSDARG00000014867	9616	RPS2	12210
ENSDARG00000003599	11896	ENSDARG00000043453	8788	ENSDARG00000063911	4016	ENSDARG00000099380	3064.3	ENSDARG00000031952	1189	ENSDARG00000100392	9540	RPL9	11732
ENSDARG00000099380	11743	ENSDARG00000023298	8750	ENSDARG00000100588	3989	ENSDARG00000102317	3036.48	ENSDARG00000053457	1181	ENSDARG00000005791	9480	RPS23	11624
ENSDARG00000035692	11727	ENSDARG00000029722	8708	ENSDARG00000070849	3987	ENSDARG00000018334	2989.44	ENSDARG00000102317	1160	ENSDARG00000035692	9342	RPS4X	11569
ENSDARG00000042905	11441	ENSDARG00000034291	8624	ENSDARG00000035692	3977	ENSDARG00000019230	2913.17	ENSDARG00000092693	1151	ENSDARG00000009285	9303	RPS8	11551
ENSDARG00000043453	11383	ENSDARG00000010516	8460	ENSDARG00000003599	3969	ENSDARG00000021838	2863.3	ENSDARG00000115271	1146	ENSDARG00000021838	9282	RPS14	11349
ENSDARG00000023298	11156	ENSDARG00000063908	8425	ENSDARG00000115271	3958	ENSDARG00000039347	2848.87	ENSDARG00000034291	1142	ENSDARG00000025581	9194	FOS	11168
ENSDARG00000010516	10928	ENSDARG00000037350	8243	ENSDARG00000104068	3937	ENSDARG00000025581	2745.1	ENSDARG00000099776	1136	ENSDARG00000055996	9098	RPL30	11143
ENSDARG00000034291	10926	ENSDARG00000077777	8156	ENSDARG00000025581	3910	ENSDARG00000057556	2711.32	ENSDARG00000099104	1112	ENSDARG00000035860	9043	RPS3	11020
ENSDARG00000036316	10784	ENSDARG00000036316	8143	ENSDARG00000063912	3842	ENSDARG00000036629	2707.96	ENSDARG00000077291	1112	ENSDARG00000042905	9009	JUN	10867
ENSDARG00000037350	10630	ENSDARG00000057556	8114	ENSDARG00000055996	3826	ENSDARG00000035860	2706.96	ENSDARG00000043257	1097	ENSDARG00000019230	8999	PTMA	10863
ENSDARG00000063908	10430	ENSDARG00000036629	7936	ENSDARG00000043453	3752	ENSDARG00000009285	2693.86	ENSDARG00000013307	1093	ENSDARG00000088030	8973	RPL19	10853
ENSDARG00000057556	10292	ENSDARG00000070849	7913	ENSDARG00000045487	3738	ENSDARG00000007320	2693.54	ENSDARG00000078618	1082	ENSDARG00000099380	8841	ACTB	10364
ENSDARG00000036629	10271	ENSDARG00000092693	7792	ENSDARG00000006691	3731	ENSDARG00000019181	2629.68	ENSDARG00000051783	1063	ENSDARG00000010516	8821	HSP90AA1	10304
ENSDARG00000099197	10047	ENSDARG00000032725	7788	ENSDARG00000014690	3622	ENSDARG00000019778	2596.28	ENSDARG00000025073	1062	ENSDARG00000019778	8757	HSPA1A	10252
ENSDARG00000032725	9943	ENSDARG00000100588	7718	ENSDARG00000099104	3585	ENSDARG00000041232	2595.62	ENSDARG00000063917	1041	ENSDARG00000099022	8666	RPL12	10250
ENSDARG00000070849	9916	ENSDARG00000099197	7560	ENSDARG00000010516	3544	ENSDARG00000014867	2587.69	ENSDARG00000058105	1035	ENSDARG00000006316	8636	RPL39	10249
ENSDARG00000100588	9753	ENSDARG00000099104	7465	ENSDARG00000036629	3532	ENSDARG00000055996	2568.79	ENSDARG00000043509	1032	ENSDARG00000011405	8624	H3F3B	10167
ENSDARG00000045487	9749	ENSDARG00000045487	7447	ENSDARG00000032725	3514	ENSDARG00000036298	2560.37	ENSDARG00000006691	1014	ENSDARG00000014690	8611	RPL11	10144
ENSDARG00000099572	9737	ENSDARG00000101766	7363	ENSDARG00000058105	3493	ENSDARG00000005791	2545.05	ENSDARG00000032725	1009	ENSDARG00000011201	8587	MT-ND2	10043
ENSDARG00000015128	9448	ENSDARG00000005791	7281	ENSDARG00000018334	3471	ENSDARG00000032725	2537.81	ENSDARG00000021811	1001	ENSDARG00000041811	8440	B2M	9839
ENSDARG00000005791	9346	ENSDARG00000036298	7192	ENSDARG00000042905	3448	ENSDARG00000037350	2520.71	ENSDARG00000014867	999	ENSDARG00000036298	8424	RPL8	9830
ENSDARG00000029722	9330	ENSDARG00000092553	7136	ENSDARG00000037350	3441	ENSDARG00000063924	2518.88	ENSDARG00000088030	994	ENSDARG00000036629	8405	RPS24	9738
ENSDARG00000099104	9294	ENSDARG00000034897	7133	ENSDARG00000100392	3410	ENSDARG00000010516	2489.35	ENSDARG00000023298	994	ENSDARG00000023298	8394	RPL15	9230
ENSDARG00000092693	9246	ENSDARG00000028335	7089	ENSDARG00000036298	3409	ENSDARG00000034897	2463.12	ENSDARG00000018334	991	ENSDARG00000045487	8326	RPL7A	9153
ENSDARG00000036298	9170	ENSDARG00000100392	6987	ENSDARG00000099380	3394	ENSDARG00000092693	2458.98	ENSDARG00000041232	982	ENSDARG00000103791	8216	RPL21	8966
ENSDARG00000006691	8694	ENSDARG00000015128	6912	ENSDARG00000088030	3292	ENSDARG00000099022	2444.52	ENSDARG00000029057	981	ENSDARG00000029500	8204	UBC	8869
ENSDARG00000018334	8616	ENSDARG00000039347	6836	ENSDARG00000009212	3241	ENSDARG00000042905	2429.35	ENSDARG00000029533	980	ENSDARG00000037350	8152	RPL35A	8800
ENSDARG00000034897	8607	ENSDARG00000018334	6595	ENSDARG00000021838	3191	ENSDARG00000100392	2422.71	ENSDARG00000042566	963	ENSDARG00000015128	8134	RPL28	8778
ENSDARG00000092553	8516	ENSDARG00000099022	6593	ENSDARG00000099022	3189	ENSDARG00000015128	2401.45	ENSDARG00000070849	955	ENSDARG00000103007	7892	RPS15	8747
ENSDARG00000100392	8480	ENSDARG00000006691	6509	ENSDARG00000057556	3145	ENSDARG00000063912	2395.16	ENSDARG00000014690	953	ENSDARG00000019181	7761	RPL26	8727
ENSDARG00000039347	8404	ENSDARG00000029500	6357	ENSDARG00000025850	3105	ENSDARG00000063911	2392.27	ENSDARG00000090228	947	ENSDARG00000046157	7712	RPL18	8627
ENSDARG00000041619	8283	ENSDARG00000035860	6314	ENSDARG00000103791	3088	ENSDARG00000014690	2387.28	ENSDARG00000100588	932	ENSDARG00000034897	7696	TMSB10	8517
ENSDARG00000101766	8280	ENSDARG00000041619	6275	ENSDARG00000005791	3081	ENSDARG00000088030	2386.06	ENSDARG00000063899	930	ENSDARG00000070437	7660	NEAT1	8466
ENSDARG00000089475	8261	ENSDARG00000035871	6193	ENSDARG00000039347	3035	ENSDARG00000100588	2363.35	ENSDARG00000063895	929	ENSDARG00000101406	7622	RPL36	8296
ENSDARG00000035871	8259	ENSDARG00000021838	6157	ENSDARG00000098724	3031	ENSDARG00000041811	2354.9	ENSDARG00000013144	928	ENSDARG00000100588	7602	RPL13A	8268
ENSDARG00000029500	8240	ENSDARG00000068992	6121	ENSDARG00000053058	3004	ENSDARG00000023298	2327.83	ENSDARG00000036298	927	ENSDARG00000102051	7574	RPS19	7997
ENSDARG00000099022	8177	ENSDARG00000103007	6053	ENSDARG00000035871	2995	ENSDARG00000053058	2317.44	ENSDARG00000005791	914	ENSDARG00000053058	7544	RPS29	7996
ENSDARG00000021838	8033	ENSDARG00000115271	6009	ENSDARG00000029500	2984	ENSDARG00000035692	2301.05	ENSDARG00000035860	904	ENSDARG00000044093	7360	RPL23A	7964
ENSDARG00000028335	7876	ENSDARG00000025850	5861	ENSDARG00000045808	2964	ENSDARG00000011405	2298.62	ENSDARG00000099022	899	ENSDARG00000003599	7301	RPL10A	7838
ENSDARG00000035860	7809	ENSDARG00000103919	5851	ENSDARG00000034897	2922	ENSDARG00000092553	2275.97	ENSDARG00000018637	872	ENSDARG00000043453	7213	RPL5	7833
ENSDARG00000053058	7731	ENSDARG00000045248	5841	ENSDARG00000015128	2921	ENSDARG00000043453	2269.8	ENSDARG00000007320	868	ENSDARG00000053365	7122	CD63	7740
ENSDARG00000103007	7626	ENSDARG00000053058	5761	ENSDARG00000041232	2833	ENSDARG00000045487	2248.44	ENSDARG00000019181	862	ENSDARG00000030408	7096	RPL18A	7725
ENSDARG00000068992	7537	ENSDARG00000058105	5725	ENSDARG00000063924	2823	ENSDARG00000006316	2185.59	ENSDARG00000037350	858	ENSDARG00000035871	6996	RPS13	7617
ENSDARG00000058105	7461	ENSDARG00000009212	5708	ENSDARG00000041619	2723	ENSDARG00000029204	2175.88	ENSDARG00000099563	858	ENSDARG00000058451	6924	RPS15A	7469
ENSDARG00000025850	7429	ENSDARG00000097102	5670	ENSDARG00000101406	2593	ENSDARG00000003599	2173.56	ENSDARG00000039347	856	ENSDARG00000006413	6498	RPL24	7399
ENSDARG00000115271	7184	ENSDARG00000088030	5657	ENSDARG00000068992	2540	ENSDARG00000029500	2112.33	ENSDARG00000036875	855	ENSDARG00000029150	6431	RPL14	7356
ENSDARG00000044093	7144	ENSDARG00000044093	5617	ENSDARG00000103007	2537	ENSDARG00000044093	2103.34	ENSDARG00000041811	853	ENSDARG00000092693	6364	LMNA	7231
ENSDARG00000045248	6999	ENSDARG00000058451	5548	ENSDARG00000044093	2533	ENSDARG00000040190	2073.78	ENSDARG00000046157	846	ENSDARG00000077717	6198	MGP	7207
ENSDARG00000088030	6856	ENSDARG00000037870	5326	ENSDARG00000031952	2476	ENSDARG00000046157	2053.51	ENSDARG00000028048	842	ENSDARG00000077777	5982	RPL6	7072
ENSDARG00000058451	6745	ENSDARG00000076532	5146	ENSDARG00000024540	2395	ENSDARG00000103791	2043.74	ENSDARG00000035871	839	ENSDARG00000025850	5982	RPS7	6896
ENSDARG00000103919	6708	ENSDARG00000006316	4993	ENSDARG00000037870	2391	ENSDARG00000035871	2041.03	ENSDARG00000025581	839	ENSDARG00000041619	5852	TYRP1	6878
ENSDARG00000009212	6529	ENSDARG00000046157	4899	ENSDARG00000058451	2341	ENSDARG00000023290	1963.88	ENSDARG00000021838	833	ENSDARG00000103433	5723	RPL29	6832
ENSDARG00000113599	6527	ENSDARG00000005513	4868	ENSDARG00000101481	2326	ENSDARG00000103007	1960.49	ENSDARG00000015128	827	ENSDARG00000041435	5371	RPS25	6830
ENSDARG00000006316	6491	ENSDARG00000088330	4565	ENSDARG00000046157	2324	ENSDARG00000025850	1946.1	ENSDARG00000019881	823	ENSDARG00000092553	5335	SAT1	6772
ENSDARG00000046157	6413	ENSDARG00000101406	4453	ENSDARG00000006316	2256	ENSDARG00000041619	1913.88	ENSDARG00000036629	821	ENSDARG00000063912	5322	RPS9	6699
ENSDARG00000005513	6160	ENSDARG00000004757	4418	ENSDARG00000070437	2200	ENSDARG00000006413	1912.16	ENSDARG00000024540	808	ENSDARG00000005513	4888	IGFBP7	6607
ENSDARG00000097102	6146	ENSDARG00000053990	4415	ENSDARG00000041811	2176	ENSDARG00000030408	1892.53	ENSDARG00000015349	803	ENSDARG00000025254	4740	FOSB	6581
ENSDARG00000089124	6143	ENSDARG00000063912	4414	ENSDARG00000033760	2153	ENSDARG00000057853	1874.39	ENSDARG00000100392	803	ENSDARG00000104011	4587	RPS16	6381
ENSDARG00000095072	6094	ENSDARG00000030408	4295	ENSDARG00000037071	2152	ENSDARG00000058451	1866.06	ENSDARG00000002311	794	ENSDARG00000041182	4334	GPX3	6177
ENSDARG00000076532	5822	ENSDARG00000041811	4216	ENSDARG00000006413	2112	ENSDARG00000101406	1844.25	ENSDARG00000058451	793	ENSDARG00000068992	4301	MT2A	6145
ENSDARG00000077777	5805	ENSDARG00000103672	4154	ENSDARG00000031317	2101	ENSDARG00000021124	1803.82	ENSDARG00000070437	779	ENSDARG00000044521	4288	RPL7	6049
ENSDARG00000030408	5643	ENSDARG00000041182	4096	ENSDARG00000025350	2067	ENSDARG00000053365	1700.34	ENSDARG00000054578	773	ENSDARG00000056119	4136	RPL22	6040
ENSDARG00000041811	5642	ENSDARG00000037071	4094	ENSDARG00000009447	1989	ENSDARG00000029150	1619.27	ENSDARG00000057556	770	ENSDARG00000037071	4047	JUNB	6028
ENSDARG00000063912	5620	ENSDARG00000098591	3864	ENSDARG00000005513	1981	ENSDARG00000026726	1610.08	ENSDARG00000006413	763	ENSDARG00000002344	3760	RPLP2	5968
ENSDARG00000004757	5543	ENSDARG00000070437	3842	ENSDARG00000017299	1972	ENSDARG00000002593	1594.98	ENSDARG00000034897	760	ENSDARG00000026726	3710	NACA	5931
ENSDARG00000101406	5515	ENSDARG00000056119	3801	ENSDARG00000030408	1957	ENSDARG00000070437	1557.74	ENSDARG00000010516	754	ENSDARG00000015862	3368	RPL35	5929
ENSDARG00000041182	5334	ENSDARG00000087390	3662	ENSDARG00000056119	1906	ENSDARG00000103994	1477.53	ENSDARG00000053365	753	ENSDARG00000069100	3350	RPL38	5773
ENSDARG00000053254	5210	ENSDARG00000013351	3620	ENSDARG00000063905	1890	ENSDARG00000035715	1463.58	ENSDARG00000103007	727	ENSDARG00000063924	3328	IFITM3	5712
ENSDARG00000037071	5090	ENSDARG00000074242	3557	ENSDARG00000004757	1838	ENSDARG00000103433	1461.36	ENSDARG00000053058	725	ENSDARG00000055475	3268	RPS21	5508
ENSDARG00000056119	4924	ENSDARG00000036161	3551	ENSDARG00000077717	1788	ENSDARG00000077717	1403.93	ENSDARG00000019778	724	ENSDARG00000063905	3244	GNB2L1	5479
ENSDARG00000063911	4810	ENSDARG00000063911	3541	ENSDARG00000103994	1721	ENSDARG00000046030	1388.03	ENSDARG00000007795	723	ENSDARG00000063911	3234	RPS5	5452
ENSDARG00000053990	4770	ENSDARG00000040764	3523	ENSDARG00000044521	1652	ENSDARG00000068992	1383.59	ENSDARG00000009285	723	ENSDARG00000024540	3083	FAU	5382
ENSDARG00000070437	4754	ENSDARG00000044521	3486	ENSDARG00000040190	1601	ENSDARG00000037071	1353.49	ENSDARG00000029150	722	ENSDARG00000002593	3070	S100A6	5272
ENSDARG00000037870	4694	ENSDARG00000041232	3484	ENSDARG00000018637	1574	ENSDARG00000041435	1347.24	ENSDARG00000045487	719	ENSDARG00000006008	3008	HSPA5	5270
ENSDARG00000103672	4677	ENSDARG00000103791	3436	ENSDARG00000077777	1551	ENSDARG00000002344	1340.29	ENSDARG00000099380	716	ENSDARG00000020197	2954	HSP90AB1	5154
ENSDARG00000094559	4659	ENSDARG00000053254	3403	ENSDARG00000099572	1538	ENSDARG00000042428	1335.85	ENSDARG00000044093	712	ENSDARG00000100371	2753	APOE	5038
ENSDARG00000074242	4587	ENSDARG00000063924	3271	ENSDARG00000045248	1538	ENSDARG00000063905	1295.02	ENSDARG00000054864	712	ENSDARG00000021124	2660	MT-ND5	5006
ENSDARG00000041232	4478	ENSDARG00000021124	3154	ENSDARG00000101766	1527	ENSDARG00000017299	1281.18	ENSDARG00000019230	708	ENSDARG00000023290	2647	RPS11	5002
ENSDARG00000013351	4298	ENSDARG00000088091	3096	ENSDARG00000041182	1504	ENSDARG00000104011	1280.44	ENSDARG00000104068	707	ENSDARG00000018637	2569	MLANA	4933
ENSDARG00000044521	4241	ENSDARG00000057026	3086	ENSDARG00000013351	1494	ENSDARG00000011076	1272.24	ENSDARG00000055996	706	ENSDARG00000103994	2512	HSPA8	4771
ENSDARG00000098591	4056	ENSDARG00000038147	2932	ENSDARG00000053365	1474	ENSDARG00000045352	1255.3	ENSDARG00000029500	705	ENSDARG00000041623	2338	UBB	4730
ENSDARG00000036161	4047	ENSDARG00000020504	2916	ENSDARG00000104011	1463	ENSDARG00000022684	1190.53	ENSDARG00000043453	683	ENSDARG00000043154	2182	S100A10	4693
ENSDARG00000063924	4018	ENSDARG00000077717	2913	ENSDARG00000031435	1460	ENSDARG00000044521	1149.18	ENSDARG00000025850	676	ENSDARG00000009447	2107	TOMM7	4604
ENSDARG00000103791	3837	ENSDARG00000023290	2907	ENSDARG00000029057	1387	ENSDARG00000031435	1147.29	ENSDARG00000006260	660	ENSDARG00000025350	2097	DNAJA1	4591
ENSDARG00000057026	3792	ENSDARG00000006413	2896	ENSDARG00000021124	1382	ENSDARG00000022315	1126.64	ENSDARG00000035692	654	ENSDARG00000011076	2087	RPS10	4562
ENSDARG00000002768	3782	ENSDARG00000052856	2856	ENSDARG00000019353	1323	ENSDARG00000056119	1117.07	ENSDARG00000045153	650	ENSDARG00000046030	2053	HSPA1B	4481
ENSDARG00000006413	3745	ENSDARG00000007960	2792	ENSDARG00000097057	1296	ENSDARG00000031981	1092.07	ENSDARG00000077717	648	ENSDARG00000102291	2015	ANXA1	4449
ENSDARG00000052856	3702	ENSDARG00000041435	2764	ENSDARG00000051874	1276	ENSDARG00000025350	1077.23	ENSDARG00000053684	643	ENSDARG00000042428	1993	LGALS1	4430
ENSDARG00000077717	3691	ENSDARG00000037746	2754	ENSDARG00000041435	1273	ENSDARG00000043154	1049	ENSDARG00000098224	640	ENSDARG00000101844	1976	RPS20	4412
ENSDARG00000020504	3587	ENSDARG00000100371	2722	ENSDARG00000029722	1226	ENSDARG00000054578	1047.95	ENSDARG00000019353	638	ENSDARG00000035400	1970	RPLP0	4264
ENSDARG00000040764	3568	ENSDARG00000116491	2677	ENSDARG00000055475	1198	ENSDARG00000101794	1042.5	ENSDARG00000103433	630	ENSDARG00000010244	1873	RPL27A	4254
ENSDARG00000100371	3547	ENSDARG00000020197	2672	ENSDARG00000031683	1170	ENSDARG00000005513	1039.35	ENSDARG00000011405	625	ENSDARG00000005823	1796	GNAS	4245
ENSDARG00000041435	3545	ENSDARG00000103994	2637	ENSDARG00000063895	1133	ENSDARG00000041182	1036.33	ENSDARG00000042905	614	ENSDARG00000004757	1765	RPL23	4243
ENSDARG00000021124	3469	ENSDARG00000015862	2603	ENSDARG00000063899	1118	ENSDARG00000003952	1024.13	ENSDARG00000033760	607	ENSDARG00000104068	1663	H2AFZ	4232
ENSDARG00000020197	3334	ENSDARG00000031435	2598	ENSDARG00000101844	1117	ENSDARG00000042876	976.042	ENSDARG00000041435	600	ENSDARG00000040439	1613	SPP1	4156
ENSDARG00000116491	3334	ENSDARG00000002344	2565	ENSDARG00000077138	1112	ENSDARG00000025147	966.09	ENSDARG00000006316	592	ENSDARG00000043257	1602	DDX5	4092
ENSDARG00000058371	3267	ENSDARG00000087636	2543	ENSDARG00000017235	1094	ENSDARG00000055475	961.193	ENSDARG00000003599	591	ENSDARG00000037860	1511	KLF4	4082
ENSDARG00000031435	3255	ENSDARG00000053365	2475	ENSDARG00000015862	1088	ENSDARG00000090634	959.255	ENSDARG00000009447	575	ENSDARG00000031435	1507	RPSA	4045
ENSDARG00000007960	3178	ENSDARG00000104181	2469	ENSDARG00000002593	1064	ENSDARG00000015050	952.612	ENSDARG00000103791	571	ENSDARG00000077533	1503	BTG1	3916
ENSDARG00000053365	3173	ENSDARG00000104011	2320	ENSDARG00000020197	1061	ENSDARG00000021143	949.414	ENSDARG00000063914	563	ENSDARG00000015551	1446	RPL36A	3864
ENSDARG00000103994	3123	ENSDARG00000063905	2253	ENSDARG00000028335	1046	ENSDARG00000070155	941.254	ENSDARG00000101766	561	ENSDARG00000094695	1439	CST3	3857
ENSDARG00000087636	3114	ENSDARG00000079305	2211	ENSDARG00000035694	1024	ENSDARG00000042214	935.041	ENSDARG00000005823	559	ENSDARG00000074242	1427	EIF4A1	3733
ENSDARG00000104011	3077	ENSDARG00000022684	2168	ENSDARG00000045352	1010	ENSDARG00000055283	926.814	ENSDARG00000098783	556	ENSDARG00000022684	1376	UBA52	3706
ENSDARG00000023290	3060	ENSDARG00000018637	2155	ENSDARG00000103433	1003	ENSDARG00000020197	923.272	ENSDARG00000004621	552	ENSDARG00000017235	1360	CD59	3695
ENSDARG00000015862	3029	ENSDARG00000054155	2128	ENSDARG00000037860	1001	ENSDARG00000063895	912.37	ENSDARG00000011201	549	ENSDARG00000070991	1329	ANXA2	3593
ENSDARG00000063905	2830	ENSDARG00000103433	2084	ENSDARG00000031776	995	ENSDARG00000058454	866.264	ENSDARG00000102291	542	ENSDARG00000013351	1321	RPS26	3570
ENSDARG00000002344	2757	ENSDARG00000055475	2081	ENSDARG00000103672	984	ENSDARG00000019644	834.354	ENSDARG00000077777	540	ENSDARG00000031981	1248	CLU	3425
ENSDARG00000015551	2740	ENSDARG00000036036	2077	ENSDARG00000063917	959	ENSDARG00000033738	810.751	ENSDARG00000002344	533	ENSDARG00000053291	1234	NPM1	3411
ENSDARG00000055475	2721	ENSDARG00000054562	2076	ENSDARG00000036161	943	ENSDARG00000037860	805.901	ENSDARG00000002791	527	ENSDARG00000063899	1191	CIRBP	3310
ENSDARG00000068507	2709	ENSDARG00000021113	2045	ENSDARG00000034572	942	ENSDARG00000063899	774.602	ENSDARG00000041619	527	ENSDARG00000063895	1188	HNRNPA1	3246
ENSDARG00000103433	2652	ENSDARG00000036162	2020	ENSDARG00000070083	925	ENSDARG00000026829	770.84	ENSDARG00000061120	518	ENSDARG00000031683	1159	C11orf96	3244
ENSDARG00000036036	2626	ENSDARG00000014196	1993	ENSDARG00000031981	890	ENSDARG00000041623	763.409	ENSDARG00000010785	514	ENSDARG00000063917	1157	RPL27	3232
ENSDARG00000009447	2625	ENSDARG00000042535	1982	ENSDARG00000015978	889	ENSDARG00000004757	741.784	ENSDARG00000025350	509	ENSDARG00000003952	1138	EGR1	3209
ENSDARG00000054155	2571	ENSDARG00000115405	1887	ENSDARG00000022684	876	ENSDARG00000010244	739.609	ENSDARG00000030408	509	ENSDARG00000057026	1115	RPL4	3177
ENSDARG00000017235	2531	ENSDARG00000031683	1880	ENSDARG00000010244	876	ENSDARG00000063917	718.993	ENSDARG00000041182	504	ENSDARG00000031776	1110	SERF2	3126
ENSDARG00000014196	2509	ENSDARG00000010244	1865	ENSDARG00000115557	864	ENSDARG00000100371	704.683	ENSDARG00000063095	499	ENSDARG00000007708	1098	DNAJB1	3125
ENSDARG00000037746	2418	ENSDARG00000009447	1857	ENSDARG00000013144	857	ENSDARG00000070161	696.773	ENSDARG00000087059	489	ENSDARG00000045248	1091	SDCBP	3110
ENSDARG00000063899	2402	ENSDARG00000035400	1852	ENSDARG00000100371	852	ENSDARG00000094695	693.956	ENSDARG00000005513	486	ENSDARG00000040190	1080	MITF	3088
ENSDARG00000039173	2388	ENSDARG00000006260	1801	ENSDARG00000103919	836	ENSDARG00000100719	690.192	ENSDARG00000059053	482	ENSDARG00000030053	1067	GLUL	3070
ENSDARG00000024548	2380	ENSDARG00000017235	1801	ENSDARG00000025147	831	ENSDARG00000018637	689.265	ENSDARG00000097057	481	ENSDARG00000099101	1056	SQSTM1	3062
ENSDARG00000054562	2364	ENSDARG00000063895	1791	ENSDARG00000104537	820	ENSDARG00000007836	669.144	ENSDARG00000071403	474	ENSDARG00000030530	1055	BTF3	3022
ENSDARG00000006260	2323	ENSDARG00000015050	1782	ENSDARG00000102105	817	ENSDARG00000034572	658.838	ENSDARG00000100371	472	ENSDARG00000101794	1047	PPDPF	2960
ENSDARG00000035400	2317	ENSDARG00000063899	1778	ENSDARG00000092798	811	ENSDARG00000015978	654.062	ENSDARG00000020298	469	ENSDARG00000007836	1039	EDNRB	2929
ENSDARG00000017441	2315	ENSDARG00000058371	1749	ENSDARG00000041799	798	ENSDARG00000009447	653.114	ENSDARG00000062059	469	ENSDARG00000036080	1026	GAPDH	2867
ENSDARG00000036162	2309	ENSDARG00000003920	1682	ENSDARG00000035400	796	ENSDARG00000088091	649.695	ENSDARG00000102558	463	ENSDARG00000102632	1001	H3F3A	2827
ENSDARG00000018637	2295	ENSDARG00000035715	1674	ENSDARG00000025566	790	ENSDARG00000043257	640.549	ENSDARG00000037860	462	ENSDARG00000032970	983	HSPB1	2784
ENSDARG00000010244	2286	ENSDARG00000031495	1642	ENSDARG00000022438	787	ENSDARG00000015862	628.324	ENSDARG00000086881	453	ENSDARG00000021143	964	LDHA	2763
ENSDARG00000032929	2269	ENSDARG00000031776	1621	ENSDARG00000002344	771	ENSDARG00000003216	622.992	ENSDARG00000033364	449	ENSDARG00000037746	944	CALR	2713
ENSDARG00000022684	2252	ENSDARG00000099865	1618	ENSDARG00000033009	765	ENSDARG00000031776	619.61	ENSDARG00000001975	448	ENSDARG00000036427	943	ITM2B	2700
ENSDARG00000079376	2245	ENSDARG00000058454	1602	ENSDARG00000057575	765	ENSDARG00000037746	612.535	ENSDARG00000057853	436	ENSDARG00000031317	941	ANXA5	2689
ENSDARG00000095254	2101	ENSDARG00000014329	1578	ENSDARG00000057853	740	ENSDARG00000021582	602.949	ENSDARG00000016963	433	ENSDARG00000045352	933	DYNLL1	2681
ENSDARG00000077533	2097	ENSDARG00000062326	1515	ENSDARG00000099499	738	ENSDARG00000095273	595.587	ENSDARG00000053291	433	ENSDARG00000003216	910	MTRNR2L12	2649
ENSDARG00000063895	2089	ENSDARG00000099766	1508	ENSDARG00000007836	729	ENSDARG00000031427	585.961	ENSDARG00000104387	425	ENSDARG00000057853	907	GADD45B	2631
ENSDARG00000021113	2056	ENSDARG00000033009	1497	ENSDARG00000035622	727	ENSDARG00000101766	570.472	ENSDARG00000013968	421	ENSDARG00000038076	905	HLA-A	2619
ENSDARG00000033683	2024	ENSDARG00000077533	1489	ENSDARG00000029204	724	ENSDARG00000017235	566.041	ENSDARG00000031776	414	ENSDARG00000035519	899	EEF1B2	2555
ENSDARG00000099865	2015	ENSDARG00000113599	1446	ENSDARG00000020133	724	ENSDARG00000020143	557.841	ENSDARG00000025147	411	ENSDARG00000034572	893	PABPC1	2547
ENSDARG00000100833	1997	ENSDARG00000055618	1413	ENSDARG00000011553	721	ENSDARG00000101844	523.709	ENSDARG00000031683	402	ENSDARG00000019253	881	PFDN5	2543
ENSDARG00000035715	1988	ENSDARG00000011125	1382	ENSDARG00000011841	719	ENSDARG00000013351	521.008	ENSDARG00000007836	389	ENSDARG00000025428	877	SRP14	2542
ENSDARG00000031776	1934	ENSDARG00000017441	1375	ENSDARG00000102291	709	ENSDARG00000045248	511.649	ENSDARG00000028740	383	ENSDARG00000090634	875	CFL1	2541
ENSDARG00000058454	1866	ENSDARG00000033683	1375	ENSDARG00000077533	706	ENSDARG00000054942	510.581	ENSDARG00000035400	379	ENSDARG00000017445	870	RPL36AL	2535
ENSDARG00000040439	1862	ENSDARG00000040439	1375	ENSDARG00000074242	696	ENSDARG00000042708	510.336	ENSDARG00000099195	364	ENSDARG00000095897	852	RPL17	2528
ENSDARG00000030411	1858	ENSDARG00000028119	1361	ENSDARG00000057026	692	ENSDARG00000040039	501.432	ENSDARG00000002768	362	ENSDARG00000015978	852	PEBP1	2527
ENSDARG00000014329	1855	ENSDARG00000025566	1357	ENSDARG00000058454	690	ENSDARG00000092798	501.162	ENSDARG00000031317	359	ENSDARG00000088091	807	ATF3	2517
ENSDARG00000031495	1850	ENSDARG00000102632	1348	ENSDARG00000095897	683	ENSDARG00000006215	493.25	ENSDARG00000043154	348	ENSDARG00000009779	800	EMP1	2513
ENSDARG00000042535	1849	ENSDARG00000053291	1337	ENSDARG00000056008	680	ENSDARG00000104537	492.769	ENSDARG00000021124	342	ENSDARG00000035715	788	EEF1D	2492
ENSDARG00000101844	1824	ENSDARG00000070083	1335	ENSDARG00000052856	674	ENSDARG00000099766	489.416	ENSDARG00000022684	337	ENSDARG00000033738	781	MYL6	2487
ENSDARG00000015050	1796	ENSDARG00000101844	1300	ENSDARG00000006260	664	ENSDARG00000063914	488.522	ENSDARG00000097827	334	ENSDARG00000017219	780	CDH19	2461
ENSDARG00000062326	1771	ENSDARG00000015551	1273	ENSDARG00000007960	658	ENSDARG00000102632	484.577	ENSDARG00000038694	331	ENSDARG00000093022	764	EEF2	2442
ENSDARG00000053291	1770	ENSDARG00000006487	1258	ENSDARG00000043511	654	ENSDARG00000087693	483.356	ENSDARG00000035519	330	ENSDARG00000029204	760	CALM2	2427
ENSDARG00000100582	1750	ENSDARG00000078473	1242	ENSDARG00000087636	646	ENSDARG00000023394	482.437	ENSDARG00000037071	328	ENSDARG00000012688	759	PRDX1	2412
ENSDARG00000089750	1745	ENSDARG00000013931	1227	ENSDARG00000099195	637	ENSDARG00000014313	482.186	ENSDARG00000056915	326	ENSDARG00000002768	757	YBX1	2409
ENSDARG00000003920	1731	ENSDARG00000011648	1216	ENSDARG00000036162	635	ENSDARG00000006260	481.744	ENSDARG00000063922	324	ENSDARG00000025566	744	CEBPD	2381
ENSDARG00000102632	1709	ENSDARG00000070959	1211	ENSDARG00000101794	629	ENSDARG00000070083	480.926	ENSDARG00000055475	322	ENSDARG00000006260	738	HNRNPA2B1	2380
ENSDARG00000053875	1694	ENSDARG00000092798	1188	ENSDARG00000019644	625	ENSDARG00000035400	480.105	ENSDARG00000015862	320	ENSDARG00000015050	738	RPL31	2373
ENSDARG00000011125	1693	ENSDARG00000004169	1179	ENSDARG00000054823	609	ENSDARG00000035622	478.828	ENSDARG00000002593	319	ENSDARG00000094300	734	CD81	2350
ENSDARG00000029069	1691	ENSDARG00000030479	1149	ENSDARG00000087693	605	ENSDARG00000017772	475.871	ENSDARG00000069478	316	ENSDARG00000070161	733	TUBA1B	2294
ENSDARG00000028119	1651	ENSDARG00000056186	1137	ENSDARG00000116491	600	ENSDARG00000011961	474.967	ENSDARG00000027249	310	ENSDARG00000068940	722	CEBPB	2290
ENSDARG00000025566	1641	ENSDARG00000068434	1135	ENSDARG00000068995	597	ENSDARG00000014165	471.721	ENSDARG00000044295	307	ENSDARG00000055283	713	UQCRB	2276
ENSDARG00000025350	1639	ENSDARG00000025254	1133	ENSDARG00000014313	594	ENSDARG00000025566	469.314	ENSDARG00000035869	307	ENSDARG00000011841	709	NDUFA4	2260
ENSDARG00000035327	1629	ENSDARG00000056725	1115	ENSDARG00000015551	591	ENSDARG00000032575	468.022	ENSDARG00000041623	306	ENSDARG00000063914	702	COX7C	2255
ENSDARG00000096905	1629	ENSDARG00000053446	1112	ENSDARG00000102632	589	ENSDARG00000069461	463.112	ENSDARG00000032619	304	ENSDARG00000042708	698	SLC3A2	2239
ENSDARG00000104181	1621	ENSDARG00000063917	1104	ENSDARG00000053990	586	ENSDARG00000032970	454.484	ENSDARG00000099351	301	ENSDARG00000025147	698	GPNMB	2233
ENSDARG00000069093	1593	ENSDARG00000007697	1088	ENSDARG00000095273	579	ENSDARG00000022438	451.477	ENSDARG00000005191	300	ENSDARG00000070083	695	ZFP36	2224
ENSDARG00000088091	1571	ENSDARG00000037860	1085	ENSDARG00000037746	577	ENSDARG00000029072	445.198	ENSDARG00000068214	298	ENSDARG00000115557	684	LGALS3	2219
ENSDARG00000070083	1566	ENSDARG00000008803	1079	ENSDARG00000057698	569	ENSDARG00000057882	438.779	ENSDARG00000004757	295	ENSDARG00000013931	683	GSTP1	2218
ENSDARG00000074306	1554	ENSDARG00000099101	1076	ENSDARG00000097102	567	ENSDARG00000098355	437.449	ENSDARG00000027065	294	ENSDARG00000013623	680	YBX3	2210
ENSDARG00000070959	1525	ENSDARG00000001889	1073	ENSDARG00000003795	566	ENSDARG00000011841	434.759	ENSDARG00000039490	294	ENSDARG00000090697	676	DSTN	2210
ENSDARG00000087651	1493	ENSDARG00000035993	1061	ENSDARG00000104517	566	ENSDARG00000038577	432.882	ENSDARG00000095897	293	ENSDARG00000099766	662	CD44	2209
ENSDARG00000040565	1485	ENSDARG00000015978	1059	ENSDARG00000019444	557	ENSDARG00000013968	431.677	ENSDARG00000031427	293	ENSDARG00000099312	657	EIF4A2	2202
ENSDARG00000030479	1477	ENSDARG00000033738	1057	ENSDARG00000019881	553	ENSDARG00000098591	429.542	ENSDARG00000086114	291	ENSDARG00000099195	651	CTSD	2183
ENSDARG00000095744	1476	ENSDARG00000068995	1029	ENSDARG00000020504	552	ENSDARG00000043795	424.235	ENSDARG00000045248	291	ENSDARG00000002745	650	ATP5E	2181
ENSDARG00000055618	1475	ENSDARG00000011665	1024	ENSDARG00000092873	551	ENSDARG00000059128	423.55	ENSDARG00000101135	288	ENSDARG00000099499	649	DCT	2144
ENSDARG00000013931	1462	ENSDARG00000017219	1022	ENSDARG00000059906	540	ENSDARG00000053217	422.715	ENSDARG00000011259	288	ENSDARG00000014313	645	CCNI	2137
ENSDARG00000099766	1460	ENSDARG00000002710	1019	ENSDARG00000043257	539	ENSDARG00000044125	420.795	ENSDARG00000098108	287	ENSDARG00000052082	645	SLC25A3	2127
ENSDARG00000078473	1460	ENSDARG00000012972	1005	ENSDARG00000037867	533	ENSDARG00000029663	419.047	ENSDARG00000002271	284	ENSDARG00000036161	645	HLA-B	2079
ENSDARG00000033009	1453	ENSDARG00000089475	1001	ENSDARG00000098355	531	ENSDARG00000115557	415.029	ENSDARG00000099499	283	ENSDARG00000068214	645	TMSB4X	2070
ENSDARG00000055514	1446	ENSDARG00000045776	1000	ENSDARG00000019404	523	ENSDARG00000025375	413.093	ENSDARG00000037789	283	ENSDARG00000092873	632	TUBA1A	2056
ENSDARG00000037860	1425	ENSDARG00000029818	991	ENSDARG00000014165	511	ENSDARG00000092873	411.815	ENSDARG00000038559	282	ENSDARG00000001950	628	SAP18	2052
ENSDARG00000063917	1425	ENSDARG00000020711	976	ENSDARG00000099766	507	ENSDARG00000057698	403.89	ENSDARG00000029204	280	ENSDARG00000032575	628	PPP1R15A	2046
ENSDARG00000015978	1422	ENSDARG00000033175	968	ENSDARG00000053217	505	ENSDARG00000031683	402.39	ENSDARG00000052690	272	ENSDARG00000019274	627	TUBB4B	2045
ENSDARG00000011648	1379	ENSDARG00000090697	949	ENSDARG00000010149	497	ENSDARG00000068940	401.264	ENSDARG00000016598	269	ENSDARG00000038577	623	ALDH1A1	2038
ENSDARG00000056725	1374	ENSDARG00000105037	948	ENSDARG00000004060	496	ENSDARG00000040287	400.973	ENSDARG00000013351	265	ENSDARG00000043848	618	GSN	2008
ENSDARG00000031683	1372	ENSDARG00000035958	945	ENSDARG00000032970	496	ENSDARG00000042539	399.604	ENSDARG00000042993	262	ENSDARG00000009830	607	IER2	2006
ENSDARG00000115557	1370	ENSDARG00000007708	933	ENSDARG00000044573	494	ENSDARG00000030053	395.536	ENSDARG00000076836	260	ENSDARG00000011553	598	SNHG7	1997
ENSDARG00000035958	1363	ENSDARG00000059360	928	ENSDARG00000052082	493	ENSDARG00000056008	394.746	ENSDARG00000073742	260	ENSDARG00000040764	591	CD9	1983
ENSDARG00000002710	1342	ENSDARG00000015427	925	ENSDARG00000056186	492	ENSDARG00000012682	394.207	ENSDARG00000101479	258	ENSDARG00000014587	589	MYADM	1971
ENSDARG00000056186	1340	ENSDARG00000035327	922	ENSDARG00000104782	481	ENSDARG00000095897	394.171	ENSDARG00000044521	257	ENSDARG00000059906	580	CITED1	1951
ENSDARG00000001889	1340	ENSDARG00000070770	922	ENSDARG00000008306	481	ENSDARG00000087636	393.024	ENSDARG00000104011	255	ENSDARG00000037789	579	WSB1	1945
ENSDARG00000000563	1339	ENSDARG00000115557	921	ENSDARG00000030694	476	ENSDARG00000104782	388.829	ENSDARG00000011841	254	ENSDARG00000021582	575	SRSF3	1942
ENSDARG00000017219	1338	ENSDARG00000040184	920	ENSDARG00000056379	473	ENSDARG00000013078	387.638	ENSDARG00000031435	253	ENSDARG00000100452	572	ALDOA	1918
ENSDARG00000053446	1317	ENSDARG00000071403	897	ENSDARG00000043701	463	ENSDARG00000037867	385.397	ENSDARG00000055510	253	ENSDARG00000022438	571	PPIA	1916
ENSDARG00000068995	1293	ENSDARG00000040565	896	ENSDARG00000015050	460	ENSDARG00000036427	378.177	ENSDARG00000103994	253	ENSDARG00000091813	570	SLC25A6	1903
ENSDARG00000036834	1281	ENSDARG00000055216	891	ENSDARG00000062326	457	ENSDARG00000011553	378.057	ENSDARG00000035622	252	ENSDARG00000040039	560	SOD1	1897
ENSDARG00000033175	1253	ENSDARG00000016516	887	ENSDARG00000098591	457	ENSDARG00000099499	374.381	ENSDARG00000056119	250	ENSDARG00000010149	556	CALM1	1886
ENSDARG00000105037	1250	ENSDARG00000100582	886	ENSDARG00000045514	456	ENSDARG00000070991	372.926	ENSDARG00000004296	248	ENSDARG00000054578	555	ZFAS1	1885
ENSDARG00000006487	1238	ENSDARG00000058358	880	ENSDARG00000038076	452	ENSDARG00000009830	367.175	ENSDARG00000069607	240	ENSDARG00000008363	555	RHOB	1873
ENSDARG00000003860	1238	ENSDARG00000022129	878	ENSDARG00000038577	451	ENSDARG00000005451	363.766	ENSDARG00000090428	238	ENSDARG00000059128	550	SKP1	1861
ENSDARG00000008803	1227	ENSDARG00000102105	866	ENSDARG00000040439	451	ENSDARG00000030694	362.418	ENSDARG00000021372	238	ENSDARG00000003032	549	COX4I1	1860
ENSDARG00000068434	1207	ENSDARG00000099499	865	ENSDARG00000005842	449	ENSDARG00000026369	358.297	ENSDARG00000017602	238	ENSDARG00000042933	544	HSP90B1	1854
ENSDARG00000092798	1203	ENSDARG00000003860	859	ENSDARG00000054890	445	ENSDARG00000077533	354.706	ENSDARG00000115557	238	ENSDARG00000070266	543	HMGB1	1820
ENSDARG00000029818	1199	ENSDARG00000114516	857	ENSDARG00000099663	442	ENSDARG00000077653	348.541	ENSDARG00000027088	238	ENSDARG00000104537	542	S100A11	1811
ENSDARG00000040440	1194	ENSDARG00000014817	856	ENSDARG00000102640	440	ENSDARG00000039007	345.145	ENSDARG00000040439	238	ENSDARG00000042876	540	HEXIM1	1808
ENSDARG00000045776	1185	ENSDARG00000040440	840	ENSDARG00000070161	436	ENSDARG00000068214	342.665	ENSDARG00000018077	234	ENSDARG00000099014	534	IER3	1784
ENSDARG00000030270	1170	ENSDARG00000042708	836	ENSDARG00000026369	435	ENSDARG00000016623	341.785	ENSDARG00000104537	233	ENSDARG00000104674	533	SOX4	1781
ENSDARG00000011665	1161	ENSDARG00000032970	833	ENSDARG00000005230	435	ENSDARG00000015551	341.6	ENSDARG00000074340	233	ENSDARG00000061228	530	HERPUD1	1771
ENSDARG00000099499	1145	ENSDARG00000023299	832	ENSDARG00000033738	433	ENSDARG00000076836	341.144	ENSDARG00000016623	225	ENSDARG00000061764	523	SERTAD1	1728
ENSDARG00000022438	1145	ENSDARG00000025350	813	ENSDARG00000063914	432	ENSDARG00000008735	340.528	ENSDARG00000044125	224	ENSDARG00000054942	520	HLA-C	1724
ENSDARG00000078069	1125	ENSDARG00000014165	808	ENSDARG00000026712	429	ENSDARG00000093022	336.272	ENSDARG00000079274	224	ENSDARG00000058454	515	YWHAE	1720
ENSDARG00000033738	1122	ENSDARG00000074057	803	ENSDARG00000059128	429	ENSDARG00000093313	332.182	ENSDARG00000027744	223	ENSDARG00000008502	514	NR4A1	1709
ENSDARG00000009978	1117	ENSDARG00000074340	801	ENSDARG00000029663	429	ENSDARG00000102105	331.732	ENSDARG00000028862	219	ENSDARG00000007795	504	PSAP	1700
ENSDARG00000011553	1113	ENSDARG00000056729	798	ENSDARG00000010946	425	ENSDARG00000012688	328.761	ENSDARG00000068940	214	ENSDARG00000042539	503	CYR61	1695
ENSDARG00000007708	1104	ENSDARG00000068436	797	ENSDARG00000013931	425	ENSDARG00000019404	320.484	ENSDARG00000017314	214	ENSDARG00000103522	502	ZFP36L1	1695
ENSDARG00000014817	1089	ENSDARG00000030053	796	ENSDARG00000038028	422	ENSDARG00000059906	317.538	ENSDARG00000038577	213	ENSDARG00000016889	501	NUPR1	1684
ENSDARG00000102105	1069	ENSDARG00000017775	795	ENSDARG00000021113	417	ENSDARG00000104517	316.186	ENSDARG00000099197	211	ENSDARG00000070155	501	IFITM2	1662
ENSDARG00000035993	1069	ENSDARG00000022438	791	ENSDARG00000035519	413	ENSDARG00000043511	315.842	ENSDARG00000031720	211	ENSDARG00000028618	498	ATP1A1	1658
ENSDARG00000020574	1066	ENSDARG00000053047	788	ENSDARG00000098783	411	ENSDARG00000038028	315.565	ENSDARG00000032970	209	ENSDARG00000077653	494	BRI3	1654
ENSDARG00000090697	1061	ENSDARG00000104782	788	ENSDARG00000008735	411	ENSDARG00000057026	315.327	ENSDARG00000040190	208	ENSDARG00000080010	492	HNRNPH1	1647
ENSDARG00000011841	1056	ENSDARG00000090268	786	ENSDARG00000069823	410	ENSDARG00000036161	315.032	ENSDARG00000093303	205	ENSDARG00000026829	492	CHCHD2	1646
ENSDARG00000028213	1055	ENSDARG00000040287	784	ENSDARG00000076568	407	ENSDARG00000100742	311.887	ENSDARG00000036080	205	ENSDARG00000059279	485	FUS	1637
ENSDARG00000015427	1055	ENSDARG00000011841	783	ENSDARG00000052063	404	ENSDARG00000052082	311.427	ENSDARG00000043531	204	ENSDARG00000021257	476	OAZ1	1630
ENSDARG00000004169	1054	ENSDARG00000012688	783	ENSDARG00000012688	404	ENSDARG00000029036	311.051	ENSDARG00000026369	203	ENSDARG00000020133	476	NFKBIA	1612
ENSDARG00000074340	1052	ENSDARG00000055514	776	ENSDARG00000001788	403	ENSDARG00000099014	303.604	ENSDARG00000012688	203	ENSDARG00000068289	474	TIMP3	1607
ENSDARG00000020711	1047	ENSDARG00000104353	767	ENSDARG00000071403	401	ENSDARG00000006242	300.832	ENSDARG00000015978	200	ENSDARG00000057698	464	TMA7	1589
ENSDARG00000025254	1038	ENSDARG00000071670	765	ENSDARG00000042876	398	ENSDARG00000057575	300.073	ENSDARG00000029722	197	ENSDARG00000102741	460	PNRC1	1585
ENSDARG00000005162	1036	ENSDARG00000099667	759	ENSDARG00000105116	397	ENSDARG00000011146	297.422	ENSDARG00000008363	197	ENSDARG00000029072	459	PLP1	1580
ENSDARG00000059360	1003	ENSDARG00000102741	757	ENSDARG00000028740	397	ENSDARG00000070266	294.591	ENSDARG00000092873	197	ENSDARG00000100742	458	LAPTM4A	1567
ENSDARG00000045143	995	ENSDARG00000070922	752	ENSDARG00000038030	386	ENSDARG00000003732	294.479	ENSDARG00000093313	196	ENSDARG00000037867	457	MARCKS	1564
ENSDARG00000070922	994	ENSDARG00000045399	750	ENSDARG00000022315	384	ENSDARG00000099572	293.615	ENSDARG00000058454	196	ENSDARG00000076568	457	CTSL	1562
ENSDARG00000044562	984	ENSDARG00000076568	749	ENSDARG00000088383	384	ENSDARG00000007745	291.221	ENSDARG00000037746	194	ENSDARG00000101766	454	CHCHD6	1557
ENSDARG00000030349	984	ENSDARG00000059654	748	ENSDARG00000078785	380	ENSDARG00000026712	288.77	ENSDARG00000022438	191	ENSDARG00000103672	454	BRD2	1557
ENSDARG00000099667	983	ENSDARG00000002768	748	ENSDARG00000014571	379	ENSDARG00000104372	288.21	ENSDARG00000018809	190	ENSDARG00000008861	453	TXNIP	1546
ENSDARG00000104353	982	ENSDARG00000038068	747	ENSDARG00000055283	377	ENSDARG00000077828	287.699	ENSDARG00000086842	190	ENSDARG00000098355	451	HSPE1	1526
ENSDARG00000068436	980	ENSDARG00000016173	747	ENSDARG00000096003	374	ENSDARG00000041363	286.702	ENSDARG00000015551	189	ENSDARG00000011961	451	CTNNB1	1525
ENSDARG00000016516	980	ENSDARG00000031317	745	ENSDARG00000021811	372	ENSDARG00000074242	286.028	ENSDARG00000038076	188	ENSDARG00000042214	451	PDK4	1522
ENSDARG00000017775	978	ENSDARG00000032575	744	ENSDARG00000011146	370	ENSDARG00000054823	283.895	ENSDARG00000004060	188	ENSDARG00000058358	450	TMEM258	1517
ENSDARG00000023299	978	ENSDARG00000011553	738	ENSDARG00000017445	368	ENSDARG00000092240	282.148	ENSDARG00000043848	187	ENSDARG00000012682	448	AMD1	1511
ENSDARG00000037789	973	ENSDARG00000054560	736	ENSDARG00000102051	366	ENSDARG00000010113	277.645	ENSDARG00000056481	186	ENSDARG00000104372	448	MT-ND4L	1509
ENSDARG00000045399	971	ENSDARG00000012820	735	ENSDARG00000016516	366	ENSDARG00000046132	276.354	ENSDARG00000001950	185	ENSDARG00000099197	448	HLA-E	1508
ENSDARG00000013623	966	ENSDARG00000040534	734	ENSDARG00000037962	364	ENSDARG00000008861	274.85	ENSDARG00000025375	185	ENSDARG00000017299	448	HINT1	1476
ENSDARG00000104537	965	ENSDARG00000104372	728	ENSDARG00000075758	363	ENSDARG00000091813	272.998	ENSDARG00000039980	185	ENSDARG00000095273	448	C12orf57	1444
ENSDARG00000017673	962	ENSDARG00000012682	721	ENSDARG00000039576	359	ENSDARG00000019253	272.243	ENSDARG00000031044	182	ENSDARG00000043795	445	S100B	1437
ENSDARG00000040184	962	ENSDARG00000019444	721	ENSDARG00000023290	359	ENSDARG00000102741	269.013	ENSDARG00000091348	181	ENSDARG00000020143	444	ID2	1430
ENSDARG00000042708	954	ENSDARG00000039034	720	ENSDARG00000074057	359	ENSDARG00000029064	268.633	ENSDARG00000037421	181	ENSDARG00000033364	442	GPM6B	1415
ENSDARG00000071403	953	ENSDARG00000036080	719	ENSDARG00000068940	356	ENSDARG00000099312	268.524	ENSDARG00000037097	181	ENSDARG00000003835	442	ZFAND5	1410
ENSDARG00000023656	952	ENSDARG00000045132	717	ENSDARG00000024492	356	ENSDARG00000032296	266.952	ENSDARG00000005451	179	ENSDARG00000093313	441	POLR2L	1410
ENSDARG00000059654	944	ENSDARG00000095273	716	ENSDARG00000076532	354	ENSDARG00000029722	266.155	ENSDARG00000041921	179	ENSDARG00000092798	441	SON	1410
ENSDARG00000014165	941	ENSDARG00000003952	716	ENSDARG00000011665	353	ENSDARG00000061228	264.758	ENSDARG00000052082	177	ENSDARG00000097057	437	FXYD1	1404
ENSDARG00000104359	939	ENSDARG00000036675	715	ENSDARG00000056233	349	ENSDARG00000074057	263.746	ENSDARG00000087693	177	ENSDARG00000044125	435	SRSF7	1399
ENSDARG00000032970	938	ENSDARG00000016889	714	ENSDARG00000010113	349	ENSDARG00000056122	262.161	ENSDARG00000046012	177	ENSDARG00000099175	435	ATP5L	1391
ENSDARG00000068457	937	ENSDARG00000020133	707	ENSDARG00000040287	348	ENSDARG00000001889	261.504	ENSDARG00000012513	177	ENSDARG00000103476	429	RPS27L	1389
ENSDARG00000012688	937	ENSDARG00000037962	706	ENSDARG00000016623	347	ENSDARG00000094673	261.055	ENSDARG00000053381	174	ENSDARG00000005451	428	MORF4L1	1388
ENSDARG00000056729	935	ENSDARG00000029069	706	ENSDARG00000046030	347	ENSDARG00000037962	260.819	ENSDARG00000044182	172	ENSDARG00000041363	428	TPI1	1383
ENSDARG00000071670	931	ENSDARG00000057484	701	ENSDARG00000037488	345	ENSDARG00000000690	260.737	ENSDARG00000076847	171	ENSDARG00000043371	425	SFPQ	1355
ENSDARG00000058358	926	ENSDARG00000092115	695	ENSDARG00000032296	345	ENSDARG00000088383	260.012	ENSDARG00000055901	171	ENSDARG00000042824	424	ATP5G2	1355
ENSDARG00000040287	923	ENSDARG00000042245	685	ENSDARG00000102741	343	ENSDARG00000007347	259.998	ENSDARG00000009106	171	ENSDARG00000045514	423	ATP6V1G1	1337
ENSDARG00000070770	917	ENSDARG00000010246	681	ENSDARG00000031427	343	ENSDARG00000071403	258.933	ENSDARG00000056410	170	ENSDARG00000007818	421	MTRNR2L8	1327
ENSDARG00000023330	914	ENSDARG00000009978	679	ENSDARG00000099865	343	ENSDARG00000022139	258.249	ENSDARG00000006215	169	ENSDARG00000019644	420	GLTSCR2	1326
ENSDARG00000001950	905	ENSDARG00000078069	676	ENSDARG00000013623	342	ENSDARG00000097057	258.017	ENSDARG00000058734	168	ENSDARG00000045132	419	SNHG8	1325
ENSDARG00000030053	905	ENSDARG00000044562	675	ENSDARG00000007480	340	ENSDARG00000042933	255.097	ENSDARG00000075706	168	ENSDARG00000090428	418	EID1	1319
ENSDARG00000019444	904	ENSDARG00000023330	674	ENSDARG00000054578	340	ENSDARG00000002745	251.222	ENSDARG00000007624	168	ENSDARG00000042993	418	PMP22	1302
ENSDARG00000016889	893	ENSDARG00000036834	674	ENSDARG00000068265	339	ENSDARG00000102482	251.089	ENSDARG00000077533	166	ENSDARG00000071403	416	SBDS	1301
ENSDARG00000016173	892	ENSDARG00000093022	664	ENSDARG00000077664	336	ENSDARG00000078785	248.939	ENSDARG00000015575	163	ENSDARG00000099281	413	RPS4Y1	1294
ENSDARG00000036675	887	ENSDARG00000015111	660	ENSDARG00000039963	335	ENSDARG00000041875	248.634	ENSDARG00000053468	162	ENSDARG00000031336	413	MAP1B	1291
ENSDARG00000031317	884	ENSDARG00000104537	660	ENSDARG00000011125	334	ENSDARG00000010149	248.051	ENSDARG00000101844	162	ENSDARG00000040287	413	EIF1B	1284
ENSDARG00000053047	876	ENSDARG00000018425	659	ENSDARG00000053446	332	ENSDARG00000044573	246.645	ENSDARG00000095451	162	ENSDARG00000076223	408	STMN1	1283
ENSDARG00000013475	874	ENSDARG00000061478	657	ENSDARG00000002790	330	ENSDARG00000056481	246.176	ENSDARG00000095273	162	ENSDARG00000074340	408	SET	1280
ENSDARG00000092115	872	ENSDARG00000021257	652	ENSDARG00000099664	328	ENSDARG00000009779	245.651	ENSDARG00000003952	162	ENSDARG00000087693	408	ATP5I	1279
ENSDARG00000104782	871	ENSDARG00000092873	648	ENSDARG00000029064	328	ENSDARG00000013443	245.575	ENSDARG00000020197	161	ENSDARG00000022315	405	TMBIM6	1278
ENSDARG00000022129	862	ENSDARG00000061187	648	ENSDARG00000067975	328	ENSDARG00000044562	245.449	ENSDARG00000102229	161	ENSDARG00000044565	402	SERPING1	1274
ENSDARG00000012972	861	ENSDARG00000032963	644	ENSDARG00000090697	327	ENSDARG00000055120	244.765	ENSDARG00000006220	160	ENSDARG00000035598	400	ATF4	1269
ENSDARG00000053217	857	ENSDARG00000013623	639	ENSDARG00000061228	326	ENSDARG00000033179	244.423	ENSDARG00000074242	158	ENSDARG00000020239	396	EIF3E	1260
ENSDARG00000005230	857	ENSDARG00000045514	635	ENSDARG00000069461	325	ENSDARG00000039830	243.46	ENSDARG00000001788	158	ENSDARG00000018961	395	CNBP	1253
ENSDARG00000109861	849	ENSDARG00000076126	635	ENSDARG00000071670	325	ENSDARG00000002369	243.28	ENSDARG00000089507	158	ENSDARG00000087636	395	EIF3K	1250
ENSDARG00000061478	848	ENSDARG00000032866	635	ENSDARG00000017219	324	ENSDARG00000030449	242.626	ENSDARG00000091418	156	ENSDARG00000043511	395	SPARC	1248
ENSDARG00000059128	847	ENSDARG00000053217	633	ENSDARG00000038068	323	ENSDARG00000103672	241.114	ENSDARG00000117130	156	ENSDARG00000008292	395	ZNF106	1244
ENSDARG00000092873	837	ENSDARG00000028198	632	ENSDARG00000029818	320	ENSDARG00000058734	240.608	ENSDARG00000102632	155	ENSDARG00000073742	391	XBP1	1244
ENSDARG00000007576	834	ENSDARG00000019881	629	ENSDARG00000099776	318	ENSDARG00000075709	240.294	ENSDARG00000019541	154	ENSDARG00000032765	388	RAC1	1238
ENSDARG00000076568	834	ENSDARG00000076667	628	ENSDARG00000063922	317	ENSDARG00000099663	240.266	ENSDARG00000036558	154	ENSDARG00000104782	388	LGI4	1234
ENSDARG00000037962	832	ENSDARG00000005230	628	ENSDARG00000032866	316	ENSDARG00000102291	238.284	ENSDARG00000070083	153	ENSDARG00000004621	386	PHLDA1	1233
ENSDARG00000098355	830	ENSDARG00000013475	619	ENSDARG00000056481	315	ENSDARG00000087390	237.908	ENSDARG00000036161	153	ENSDARG00000103566	386	NCL	1227
ENSDARG00000054560	829	ENSDARG00000013078	618	ENSDARG00000059298	313	ENSDARG00000103720	237.858	ENSDARG00000009779	153	ENSDARG00000041691	383	SLC38A2	1227
ENSDARG00000074057	829	ENSDARG00000068289	615	ENSDARG00000076667	313	ENSDARG00000028335	234.759	ENSDARG00000008735	153	ENSDARG00000001788	380	PDIA3	1221
ENSDARG00000095897	826	ENSDARG00000037009	614	ENSDARG00000089976	312	ENSDARG00000063922	233.58	ENSDARG00000094695	151	ENSDARG00000095451	380	ID4	1216
ENSDARG00000104517	826	ENSDARG00000062592	613	ENSDARG00000013078	310	ENSDARG00000056186	231.214	ENSDARG00000098591	151	ENSDARG00000031388	378	HNRNPDL	1214
ENSDARG00000057484	824	ENSDARG00000044669	613	ENSDARG00000057882	310	ENSDARG00000036080	230.384	ENSDARG00000094730	151	ENSDARG00000013078	376	DDIT3	1210
ENSDARG00000032866	824	ENSDARG00000098355	610	ENSDARG00000087390	309	ENSDARG00000056582	230.263	ENSDARG00000054272	151	ENSDARG00000003151	373	ASAH1	1208
ENSDARG00000055216	820	ENSDARG00000039830	608	ENSDARG00000003032	307	ENSDARG00000002790	230.083	ENSDARG00000104782	151	ENSDARG00000057882	369	NUCKS1	1207
ENSDARG00000068289	819	ENSDARG00000030270	607	ENSDARG00000077652	306	ENSDARG00000074671	229.76	ENSDARG00000098355	150	ENSDARG00000086881	368	PTGES3	1205
ENSDARG00000102741	815	ENSDARG00000101637	604	ENSDARG00000033364	306	ENSDARG00000028198	229.576	ENSDARG00000016368	150	ENSDARG00000019404	367	UQCRH	1190
ENSDARG00000007385	814	ENSDARG00000038030	603	ENSDARG00000017775	304	ENSDARG00000053291	228.441	ENSDARG00000103476	150	ENSDARG00000039980	364	TAGLN2	1189
ENSDARG00000045132	814	ENSDARG00000102640	602	ENSDARG00000044751	304	ENSDARG00000003795	228.225	ENSDARG00000074378	148	ENSDARG00000087303	362	TMEM176B	1189
ENSDARG00000067997	811	ENSDARG00000059906	599	ENSDARG00000012682	300	ENSDARG00000068995	227.933	ENSDARG00000002369	148	ENSDARG00000017602	359	NPC2	1189
ENSDARG00000095273	801	ENSDARG00000104517	598	ENSDARG00000093945	300	ENSDARG00000090454	227.186	ENSDARG00000054271	147	ENSDARG00000013475	357	UBE2D3	1187
ENSDARG00000012682	796	ENSDARG00000016484	596	ENSDARG00000028889	298	ENSDARG00000017445	226.119	ENSDARG00000038028	146	ENSDARG00000100020	357	MYL12B	1187
ENSDARG00000037009	793	ENSDARG00000059128	595	ENSDARG00000075709	297	ENSDARG00000034240	225.825	ENSDARG00000037867	146	ENSDARG00000088383	356	HSPA2	1184
ENSDARG00000045514	792	ENSDARG00000036830	594	ENSDARG00000040039	296	ENSDARG00000005823	225.394	ENSDARG00000009950	146	ENSDARG00000076836	355	CYCS	1182
ENSDARG00000010149	792	ENSDARG00000007385	590	ENSDARG00000012504	295	ENSDARG00000096118	224.648	ENSDARG00000045490	142	ENSDARG00000086842	355	SUMO2	1182
ENSDARG00000026165	792	ENSDARG00000099175	588	ENSDARG00000076223	294	ENSDARG00000039914	224.427	ENSDARG00000068567	142	ENSDARG00000027744	352	CD74	1174
ENSDARG00000019404	789	ENSDARG00000010149	582	ENSDARG00000042708	294	ENSDARG00000019444	223.024	ENSDARG00000013979	142	ENSDARG00000062326	351	COX6C	1171
ENSDARG00000101637	788	ENSDARG00000116617	581	ENSDARG00000011235	294	ENSDARG00000103736	222.489	ENSDARG00000010946	141	ENSDARG00000054823	351	EIF5	1165
ENSDARG00000003952	788	ENSDARG00000014591	579	ENSDARG00000005451	291	ENSDARG00000090194	222.463	ENSDARG00000044362	141	ENSDARG00000068995	348	RBM3	1164
ENSDARG00000021257	787	ENSDARG00000003795	578	ENSDARG00000009640	291	ENSDARG00000013623	221.129	ENSDARG00000003032	140	ENSDARG00000038559	348	HNRNPK	1163
ENSDARG00000067990	787	ENSDARG00000020574	574	ENSDARG00000003151	290	ENSDARG00000077664	219.144	ENSDARG00000011146	140	ENSDARG00000031427	346	ARID5B	1160
ENSDARG00000036080	787	ENSDARG00000104674	573	ENSDARG00000070472	289	ENSDARG00000045132	217.363	ENSDARG00000041799	138	ENSDARG00000101324	345	COX5B	1154
ENSDARG00000008292	785	ENSDARG00000017673	573	ENSDARG00000036329	286	ENSDARG00000005162	216.716	ENSDARG00000055339	137	ENSDARG00000003795	345	ID3	1153
ENSDARG00000038068	781	ENSDARG00000006399	566	ENSDARG00000044562	284	ENSDARG00000036329	216.466	ENSDARG00000034572	136	ENSDARG00000033789	344	VMP1	1151
ENSDARG00000031483	781	ENSDARG00000058203	566	ENSDARG00000059654	283	ENSDARG00000033009	216.462	ENSDARG00000017235	136	ENSDARG00000003695	343	DUSP1	1147
ENSDARG00000038030	779	ENSDARG00000007438	566	ENSDARG00000045618	282	ENSDARG00000020504	215.866	ENSDARG00000025428	135	ENSDARG00000090454	342	KCNQ1OT1	1138
ENSDARG00000015111	774	ENSDARG00000054616	562	ENSDARG00000010052	282	ENSDARG00000001788	215.624	ENSDARG00000032705	135	ENSDARG00000056186	341	HSPD1	1136
ENSDARG00000093022	774	ENSDARG00000106529	562	ENSDARG00000101560	280	ENSDARG00000017775	215	ENSDARG00000097102	135	ENSDARG00000011146	340	GPX4	1134
ENSDARG00000106529	771	ENSDARG00000003151	562	ENSDARG00000104901	279	ENSDARG00000076568	213.714	ENSDARG00000087697	135	ENSDARG00000028106	339	CD99	1128
ENSDARG00000018404	768	ENSDARG00000053569	561	ENSDARG00000076836	278	ENSDARG00000070404	213.422	ENSDARG00000009830	134	ENSDARG00000014165	337	TIMP2	1121
ENSDARG00000039034	759	ENSDARG00000068820	559	ENSDARG00000028119	277	ENSDARG00000104674	212.678	ENSDARG00000035868	134	ENSDARG00000035622	335	RAB7A	1118
ENSDARG00000037867	755	ENSDARG00000020298	558	ENSDARG00000022129	277	ENSDARG00000040764	212.012	ENSDARG00000092798	133	ENSDARG00000002632	333	COX6B1	1111
ENSDARG00000019881	753	ENSDARG00000008292	558	ENSDARG00000056167	277	ENSDARG00000045514	210.797	ENSDARG00000104018	132	ENSDARG00000016623	333	LDHB	1110
ENSDARG00000014591	748	ENSDARG00000056732	555	ENSDARG00000027744	277	ENSDARG00000098813	210.54	ENSDARG00000068436	132	ENSDARG00000004060	332	CLTA	1108
ENSDARG00000012820	748	ENSDARG00000104359	551	ENSDARG00000007745	274	ENSDARG00000037488	209.458	ENSDARG00000039381	132	ENSDARG00000099572	332	H2AFJ	1104
ENSDARG00000088383	748	ENSDARG00000091150	545	ENSDARG00000007708	274	ENSDARG00000008363	208.224	ENSDARG00000019644	131	ENSDARG00000076667	328	NDUFS5	1102
ENSDARG00000075527	733	ENSDARG00000016871	543	ENSDARG00000096118	272	ENSDARG00000104470	208.216	ENSDARG00000032102	131	ENSDARG00000096003	327	ST13	1098
ENSDARG00000019122	726	ENSDARG00000020007	543	ENSDARG00000002632	272	ENSDARG00000007960	207.919	ENSDARG00000043342	131	ENSDARG00000103919	325	COMMD6	1096
ENSDARG00000010246	723	ENSDARG00000037790	539	ENSDARG00000035715	272	ENSDARG00000002240	207.492	ENSDARG00000095533	131	ENSDARG00000063095	322	ATP5J	1095
ENSDARG00000061187	722	ENSDARG00000017084	538	ENSDARG00000003952	272	ENSDARG00000075989	207.379	ENSDARG00000010250	130	ENSDARG00000074378	320	PCBP2	1091
ENSDARG00000070835	721	ENSDARG00000088383	535	ENSDARG00000077653	271	ENSDARG00000074246	205.765	ENSDARG00000056331	129	ENSDARG00000038028	320	DDIT4	1085
ENSDARG00000016793	716	ENSDARG00000008706	533	ENSDARG00000026908	271	ENSDARG00000031317	202.425	ENSDARG00000101199	129	ENSDARG00000102452	320	HES1	1077
ENSDARG00000017891	712	ENSDARG00000057854	532	ENSDARG00000036558	269	ENSDARG00000069100	201.993	ENSDARG00000080010	129	ENSDARG00000104517	320	BTG2	1076
ENSDARG00000104372	707	ENSDARG00000032242	531	ENSDARG00000023394	268	ENSDARG00000025554	201.36	ENSDARG00000007708	129	ENSDARG00000103720	319	OST4	1074
ENSDARG00000091150	700	ENSDARG00000019404	531	ENSDARG00000104372	266	ENSDARG00000035598	200.23	ENSDARG00000056765	128	ENSDARG00000008243	317	TMEM59	1073
ENSDARG00000039830	697	ENSDARG00000039914	530	ENSDARG00000038559	266	ENSDARG00000076223	200.16	ENSDARG00000016687	127	ENSDARG00000063922	315	EIF4G2	1071
ENSDARG00000039578	696	ENSDARG00000037867	528	ENSDARG00000009830	265	ENSDARG00000040439	198.924	ENSDARG00000036074	127	ENSDARG00000035924	311	EDF1	1070
ENSDARG00000014313	689	ENSDARG00000095897	525	ENSDARG00000041921	265	ENSDARG00000017219	198.538	ENSDARG00000043483	127	ENSDARG00000029722	310	UBE2B	1069
ENSDARG00000028198	685	ENSDARG00000043484	524	ENSDARG00000099667	265	ENSDARG00000031388	197.576	ENSDARG00000017445	127	ENSDARG00000019444	310	MORF4L2	1064
ENSDARG00000068820	682	ENSDARG00000002240	524	ENSDARG00000090912	264	ENSDARG00000033789	196.092	ENSDARG00000036299	125	ENSDARG00000011665	305	COX6A1	1063
ENSDARG00000038577	680	ENSDARG00000045914	523	ENSDARG00000010785	264	ENSDARG00000074340	194.446	ENSDARG00000014313	124	ENSDARG00000018328	305	AP1S2	1056
ENSDARG00000014420	679	ENSDARG00000060756	522	ENSDARG00000010481	264	ENSDARG00000103919	194.229	ENSDARG00000079280	124	ENSDARG00000041314	302	SLC25A5	1051
ENSDARG00000017084	678	ENSDARG00000056167	520	ENSDARG00000057912	264	ENSDARG00000096003	192.529	ENSDARG00000019556	124	ENSDARG00000021113	299	ZFP36L2	1045
ENSDARG00000102291	675	ENSDARG00000026829	518	ENSDARG00000074340	262	ENSDARG00000044540	190.67	ENSDARG00000007682	123	ENSDARG00000004930	299	COX8A	1044
ENSDARG00000104674	674	ENSDARG00000099664	517	ENSDARG00000092115	261	ENSDARG00000019274	189.976	ENSDARG00000100515	123	ENSDARG00000054058	298	RBM39	1044
ENSDARG00000018425	670	ENSDARG00000005162	515	ENSDARG00000001873	261	ENSDARG00000038076	189.711	ENSDARG00000069461	121	ENSDARG00000025375	298	COX7A2	1042
ENSDARG00000016484	668	ENSDARG00000019353	514	ENSDARG00000045490	256	ENSDARG00000068289	189.511	ENSDARG00000057026	121	ENSDARG00000063626	298	SOCS3	1041
ENSDARG00000013078	665	ENSDARG00000025789	514	ENSDARG00000045367	256	ENSDARG00000020795	188.148	ENSDARG00000058381	121	ENSDARG00000087647	298	UBL5	1037
ENSDARG00000053912	662	ENSDARG00000067975	514	ENSDARG00000005191	255	ENSDARG00000061764	187.905	ENSDARG00000020847	120	ENSDARG00000020298	298	RTN4	1035
ENSDARG00000007697	661	ENSDARG00000102452	512	ENSDARG00000043371	255	ENSDARG00000079687	186.546	ENSDARG00000077709	120	ENSDARG00000052856	296	SRSF2	1032
ENSDARG00000077776	660	ENSDARG00000058328	510	ENSDARG00000076120	255	ENSDARG00000007697	185.227	ENSDARG00000039117	120	ENSDARG00000034757	296	SELM	1027
ENSDARG00000068265	658	ENSDARG00000010481	510	ENSDARG00000068214	255	ENSDARG00000075758	184.651	ENSDARG00000003795	120	ENSDARG00000100515	295	HIST1H4C	1023
ENSDARG00000068940	657	ENSDARG00000074378	509	ENSDARG00000068436	254	ENSDARG00000069090	184.566	ENSDARG00000020504	119	ENSDARG00000041607	294	HNRNPA3	1018
ENSDARG00000044669	657	ENSDARG00000070019	509	ENSDARG00000036036	253	ENSDARG00000013931	183.318	ENSDARG00000007098	119	ENSDARG00000079274	294	USMG5	1017
ENSDARG00000035519	653	ENSDARG00000006225	505	ENSDARG00000070386	253	ENSDARG00000099195	182.983	ENSDARG00000011235	119	ENSDARG00000017314	294	EMP3	1017
ENSDARG00000003151	652	ENSDARG00000014420	505	ENSDARG00000042214	252	ENSDARG00000035565	181.798	ENSDARG00000037941	118	ENSDARG00000069461	292	HNRNPF	1016
ENSDARG00000101813	650	ENSDARG00000053912	505	ENSDARG00000030479	251	ENSDARG00000019881	181.195	ENSDARG00000010113	118	ENSDARG00000009106	292	AEBP1	1013
ENSDARG00000034470	650	ENSDARG00000094041	503	ENSDARG00000030053	251	ENSDARG00000003151	179.602	ENSDARG00000010149	118	ENSDARG00000076532	291	H1FX	1005
ENSDARG00000025789	650	ENSDARG00000017891	502	ENSDARG00000040764	249	ENSDARG00000090389	179.343	ENSDARG00000045886	117	ENSDARG00000058047	287	VAPA	1004
ENSDARG00000099175	648	ENSDARG00000045373	500	ENSDARG00000077776	249	ENSDARG00000025428	179.23	ENSDARG00000069100	117	ENSDARG00000019881	286	SEPP1	1003
ENSDARG00000002240	648	ENSDARG00000035018	499	ENSDARG00000006399	245	ENSDARG00000023323	179.092	ENSDARG00000034718	117	ENSDARG00000052178	285	SERPINF1	999
ENSDARG00000104227	646	ENSDARG00000042236	499	ENSDARG00000093022	243	ENSDARG00000101560	178.593	ENSDARG00000101794	117	ENSDARG00000056008	284	UBE2S	997
ENSDARG00000017299	646	ENSDARG00000101082	495	ENSDARG00000013968	243	ENSDARG00000028087	176.814	ENSDARG00000022509	117	ENSDARG00000017624	283	ABL2	994
ENSDARG00000016871	645	ENSDARG00000018404	493	ENSDARG00000055120	243	ENSDARG00000008494	176.252	ENSDARG00000020876	116	ENSDARG00000009950	281	C19orf43	994
ENSDARG00000003795	645	ENSDARG00000101560	492	ENSDARG00000039980	243	ENSDARG00000059298	174.973	ENSDARG00000101293	115	ENSDARG00000053217	280	NDUFA13	992
ENSDARG00000006399	641	ENSDARG00000105223	491	ENSDARG00000053047	242	ENSDARG00000036162	174.631	ENSDARG00000015887	115	ENSDARG00000005926	280	CLIC4	987
ENSDARG00000076667	640	ENSDARG00000061228	491	ENSDARG00000059360	242	ENSDARG00000103364	172.849	ENSDARG00000090526	115	ENSDARG00000015866	277	SERPINE2	986
ENSDARG00000093493	640	ENSDARG00000017445	490	ENSDARG00000033175	240	ENSDARG00000103522	172.122	ENSDARG00000075282	114	ENSDARG00000102640	277	GSTO1	986
ENSDARG00000058203	639	ENSDARG00000026845	487	ENSDARG00000041314	240	ENSDARG00000027590	172.023	ENSDARG00000096594	113	ENSDARG00000053047	276	2007-09-01	982
ENSDARG00000102452	637	ENSDARG00000027899	486	ENSDARG00000039117	239	ENSDARG00000079305	170.866	ENSDARG00000012625	113	ENSDARG00000028335	275	TXN	981
ENSDARG00000038028	634	ENSDARG00000099195	485	ENSDARG00000053291	239	ENSDARG00000038030	170.76	ENSDARG00000021309	112	ENSDARG00000099694	274	KLF6	981
ENSDARG00000101082	629	ENSDARG00000100003	485	ENSDARG00000008292	239	ENSDARG00000053047	170.596	ENSDARG00000102612	112	ENSDARG00000021669	273	ARL6IP1	977
ENSDARG00000017445	626	ENSDARG00000013938	482	ENSDARG00000021257	238	ENSDARG00000045618	169.595	ENSDARG00000033609	112	ENSDARG00000044902	272	HNRNPH3	974
ENSDARG00000032296	625	ENSDARG00000041875	482	ENSDARG00000029445	238	ENSDARG00000039980	169.409	ENSDARG00000023220	112	ENSDARG00000055064	271	EIF3L	974
ENSDARG00000056008	622	ENSDARG00000097057	481	ENSDARG00000027899	237	ENSDARG00000013979	167.677	ENSDARG00000032614	112	ENSDARG00000090228	270	DDX3X	973
ENSDARG00000010113	622	ENSDARG00000035622	479	ENSDARG00000075989	236	ENSDARG00000002791	166.477	ENSDARG00000017219	112	ENSDARG00000029064	270	CAV1	971
ENSDARG00000009950	620	ENSDARG00000075758	479	ENSDARG00000025554	236	ENSDARG00000041691	165.58	ENSDARG00000014106	112	ENSDARG00000099241	269	TOMM20	970
ENSDARG00000006225	618	ENSDARG00000102978	477	ENSDARG00000086618	236	ENSDARG00000006290	165.511	ENSDARG00000030700	112	ENSDARG00000008735	269	MRFAP1	970
ENSDARG00000099664	618	ENSDARG00000077776	475	ENSDARG00000040314	235	ENSDARG00000025693	165.259	ENSDARG00000036107	112	ENSDARG00000039007	269	SOD2	970
ENSDARG00000032575	618	ENSDARG00000089124	474	ENSDARG00000045132	235	ENSDARG00000039490	164.254	ENSDARG00000103720	111	ENSDARG00000029818	268	SNX3	967
ENSDARG00000015445	617	ENSDARG00000005926	472	ENSDARG00000071235	235	ENSDARG00000041314	164.011	ENSDARG00000020133	110	ENSDARG00000053858	268	MYL12A	967
ENSDARG00000016443	614	ENSDARG00000059298	471	ENSDARG00000041391	234	ENSDARG00000020133	163.968	ENSDARG00000033009	109	ENSDARG00000009881	268	NDUFC2	966
ENSDARG00000007438	613	ENSDARG00000010113	471	ENSDARG00000059725	232	ENSDARG00000113599	163.089	ENSDARG00000039576	109	ENSDARG00000026369	266	TCEB2	966
ENSDARG00000061228	612	ENSDARG00000038028	469	ENSDARG00000097478	232	ENSDARG00000088330	162.775	ENSDARG00000068995	109	ENSDARG00000010113	266	EIF4B	960
ENSDARG00000005926	607	ENSDARG00000012405	468	ENSDARG00000006290	231	ENSDARG00000103735	162.125	ENSDARG00000073699	109	ENSDARG00000054916	266	RAN	960
ENSDARG00000068432	599	ENSDARG00000104227	467	ENSDARG00000043531	231	ENSDARG00000005172	161.972	ENSDARG00000037278	108	ENSDARG00000044562	265	ATP5B	959
ENSDARG00000059298	595	ENSDARG00000014313	463	ENSDARG00000002240	231	ENSDARG00000020261	161.685	ENSDARG00000099766	108	ENSDARG00000034240	264	SCN7A	957
ENSDARG00000067975	594	ENSDARG00000076283	463	ENSDARG00000070824	230	ENSDARG00000035880	161.034	ENSDARG00000058606	108	ENSDARG00000012513	264	APP	957
ENSDARG00000008706	593	ENSDARG00000054290	459	ENSDARG00000069521	230	ENSDARG00000009640	160.868	ENSDARG00000034753	108	ENSDARG00000013968	262	HNRNPM	956
ENSDARG00000001788	590	ENSDARG00000009950	459	ENSDARG00000043795	229	ENSDARG00000054063	159.822	ENSDARG00000010434	108	ENSDARG00000060457	261	CSDE1	952
ENSDARG00000042236	590	ENSDARG00000006092	458	ENSDARG00000052712	228	ENSDARG00000058047	159.344	ENSDARG00000076223	107	ENSDARG00000045399	261	SEC62	951
ENSDARG00000056732	589	ENSDARG00000070835	458	ENSDARG00000020261	228	ENSDARG00000014587	159.011	ENSDARG00000038068	107	ENSDARG00000090194	259	CSTB	946
ENSDARG00000070019	588	ENSDARG00000038577	457	ENSDARG00000031483	228	ENSDARG00000030530	158.944	ENSDARG00000011553	107	ENSDARG00000044573	258	RGCC	944
ENSDARG00000043484	585	ENSDARG00000052082	456	ENSDARG00000111013	227	ENSDARG00000011611	158.787	ENSDARG00000070972	107	ENSDARG00000039914	258	RBM8A	938
ENSDARG00000063914	584	ENSDARG00000070472	456	ENSDARG00000088330	227	ENSDARG00000002632	157.703	ENSDARG00000003705	107	ENSDARG00000020693	258	RHOBTB3	936
ENSDARG00000052082	583	ENSDARG00000102291	453	ENSDARG00000076486	227	ENSDARG00000013804	157.437	ENSDARG00000043322	106	ENSDARG00000033009	257	ENO1	931
ENSDARG00000060041	581	ENSDARG00000105177	453	ENSDARG00000075045	226	ENSDARG00000008886	156.985	ENSDARG00000044573	105	ENSDARG00000013144	257	PPIB	929
ENSDARG00000014571	581	ENSDARG00000034470	452	ENSDARG00000033789	226	ENSDARG00000078386	156.677	ENSDARG00000018060	104	ENSDARG00000070922	255	PRDX6	920
ENSDARG00000019353	580	ENSDARG00000016855	452	ENSDARG00000039997	226	ENSDARG00000074552	155.473	ENSDARG00000077360	104	ENSDARG00000074057	255	INTS6	919
ENSDARG00000009640	579	ENSDARG00000001950	451	ENSDARG00000104674	222	ENSDARG00000068265	155.115	ENSDARG00000021113	104	ENSDARG00000038030	254	WTAP	918
ENSDARG00000075758	578	ENSDARG00000087897	448	ENSDARG00000052061	222	ENSDARG00000099281	154.112	ENSDARG00000013623	104	ENSDARG00000012244	254	TCEAL4	918
ENSDARG00000053569	575	ENSDARG00000078748	448	ENSDARG00000068289	222	ENSDARG00000032430	153.961	ENSDARG00000089824	104	ENSDARG00000046132	253	NDRG2	916
ENSDARG00000029058	574	ENSDARG00000029058	448	ENSDARG00000068434	222	ENSDARG00000069521	153.722	ENSDARG00000077515	103	ENSDARG00000040046	253	RHOA	911
ENSDARG00000059725	571	ENSDARG00000001788	446	ENSDARG00000032575	222	ENSDARG00000099175	153.057	ENSDARG00000101324	103	ENSDARG00000102571	253	EIF1AX	911
ENSDARG00000101794	571	ENSDARG00000063914	445	ENSDARG00000105037	221	ENSDARG00000016754	152.722	ENSDARG00000006397	103	ENSDARG00000007960	252	AHNAK	909
ENSDARG00000037188	571	ENSDARG00000009640	444	ENSDARG00000006487	221	ENSDARG00000099241	152.57	ENSDARG00000087303	103	ENSDARG00000036456	251	TOB1	907
ENSDARG00000076283	571	ENSDARG00000002613	444	ENSDARG00000054172	220	ENSDARG00000042777	152.115	ENSDARG00000016532	102	ENSDARG00000053254	250	SELK	905
ENSDARG00000038205	568	ENSDARG00000095743	443	ENSDARG00000003486	219	ENSDARG00000008292	151.939	ENSDARG00000009499	102	ENSDARG00000058606	250	NDUFA1	905
ENSDARG00000097691	567	ENSDARG00000038066	440	ENSDARG00000003695	219	ENSDARG00000068262	150.783	ENSDARG00000090454	101	ENSDARG00000013804	250	PFN1	901
ENSDARG00000026845	566	ENSDARG00000068432	439	ENSDARG00000040184	219	ENSDARG00000021252	150.775	ENSDARG00000014333	101	ENSDARG00000059816	249	MT1X	896
ENSDARG00000094041	565	ENSDARG00000062152	439	ENSDARG00000008706	218	ENSDARG00000087647	150.685	ENSDARG00000052994	101	ENSDARG00000021195	249	CLIC1	895
ENSDARG00000027899	562	ENSDARG00000068265	438	ENSDARG00000041400	218	ENSDARG00000013144	150.667	ENSDARG00000061214	100	ENSDARG00000077360	248	EIF3H	895
ENSDARG00000016855	561	ENSDARG00000097691	438	ENSDARG00000063095	217	ENSDARG00000059391	150.506	ENSDARG00000038615	100	ENSDARG00000104279	247	SRRM2	895
ENSDARG00000045373	561	ENSDARG00000014571	436	ENSDARG00000070922	216	ENSDARG00000021257	149.135	ENSDARG00000041875	100	ENSDARG00000019231	247	ID1	893
ENSDARG00000032242	560	ENSDARG00000004427	435	ENSDARG00000058349	215	ENSDARG00000028106	148.745	ENSDARG00000027236	100	ENSDARG00000076847	246	NAP1L1	888
ENSDARG00000017741	558	ENSDARG00000077226	435	ENSDARG00000028327	215	ENSDARG00000115405	148.401	ENSDARG00000008697	100	ENSDARG00000020504	246	TIMP1	885
ENSDARG00000057738	555	ENSDARG00000069422	435	ENSDARG00000003920	215	ENSDARG00000052856	148.23			ENSDARG00000016443	245	LITAF	884
ENSDARG00000069422	553	ENSDARG00000068940	433	ENSDARG00000056583	214	ENSDARG00000076318	148.112			ENSDARG00000045618	244	PRNP	883
ENSDARG00000086618	551	ENSDARG00000077811	432	ENSDARG00000013863	214	ENSDARG00000003835	147.858			ENSDARG00000077664	244	MGST3	880
ENSDARG00000032963	551	ENSDARG00000098574	431	ENSDARG00000038867	213	ENSDARG00000089626	147.845			ENSDARG00000053381	243	COMT	878
ENSDARG00000014536	550	ENSDARG00000023323	429	ENSDARG00000045928	213	ENSDARG00000015757	146.946			ENSDARG00000078785	243	ARPC1B	877
ENSDARG00000101560	548	ENSDARG00000043795	428	ENSDARG00000016889	212	ENSDARG00000016470	146.873			ENSDARG00000100513	243	HLA-DRA	873
ENSDARG00000057854	544	ENSDARG00000056008	427	ENSDARG00000102115	212	ENSDARG00000093945	145.826			ENSDARG00000102191	242	PLK2	869
ENSDARG00000078748	544	ENSDARG00000086618	423	ENSDARG00000013475	211	ENSDARG00000035519	145.495			ENSDARG00000040177	242	CCNL1	867
ENSDARG00000031795	544	ENSDARG00000042539	423	ENSDARG00000092467	211	ENSDARG00000056638	145.009			ENSDARG00000103736	242	C11orf58	866
ENSDARG00000099306	539	ENSDARG00000059725	422	ENSDARG00000041875	211	ENSDARG00000016128	144.714			ENSDARG00000002240	242	HNRNPA0	862
ENSDARG00000011146	538	ENSDARG00000010965	421	ENSDARG00000016754	211	ENSDARG00000040988	144.644			ENSDARG00000011934	241	IFRD1	862
ENSDARG00000007184	533	ENSDARG00000078785	421	ENSDARG00000041332	210	ENSDARG00000012513	144.389			ENSDARG00000033609	241	IFI16	859
ENSDARG00000054290	532	ENSDARG00000058128	420	ENSDARG00000056549	209	ENSDARG00000090912	143.521			ENSDARG00000101914	239	GNG11	859
ENSDARG00000024141	531	ENSDARG00000057738	417	ENSDARG00000021582	208	ENSDARG00000070472	141.917			ENSDARG00000038439	239	QPCT	858
ENSDARG00000002613	529	ENSDARG00000039578	416	ENSDARG00000098671	208	ENSDARG00000061763	141.605			ENSDARG00000002369	238	UQCRQ	856
ENSDARG00000059906	528	ENSDARG00000070688	416	ENSDARG00000008936	208	ENSDARG00000103101	141.487			ENSDARG00000035043	238	GNG5	853
ENSDARG00000010965	525	ENSDARG00000035043	415	ENSDARG00000044540	206	ENSDARG00000038432	141.346			ENSDARG00000022303	237	ARF1	852
ENSDARG00000007745	523	ENSDARG00000089302	415	ENSDARG00000036995	205	ENSDARG00000003032	140.317			ENSDARG00000007745	237	KTN1	850
ENSDARG00000006092	523	ENSDARG00000100452	415	ENSDARG00000009534	205	ENSDARG00000004060	139.963			ENSDARG00000007693	237	TBCA	846
ENSDARG00000105177	521	ENSDARG00000016443	414	ENSDARG00000013443	205	ENSDARG00000058128	139.739			ENSDARG00000057912	237	U2AF1	846
ENSDARG00000099241	519	ENSDARG00000070657	414	ENSDARG00000005926	205	ENSDARG00000054696	139.646			ENSDARG00000103735	236	TSC22D3	840
ENSDARG00000097057	518	ENSDARG00000037397	413	ENSDARG00000043484	204	ENSDARG00000116491	139.4			ENSDARG00000036329	236	NDUFB1	840
ENSDARG00000041875	515	ENSDARG00000004735	413	ENSDARG00000043322	204	ENSDARG00000043371	138.903			ENSDARG00000103271	236	IRF1	839
ENSDARG00000003526	515	ENSDARG00000036371	411	ENSDARG00000002791	203	ENSDARG00000037153	138.68			ENSDARG00000059654	235	VDAC2	836
ENSDARG00000004735	513	ENSDARG00000036754	410	ENSDARG00000054696	203	ENSDARG00000036942	138.424			ENSDARG00000045490	235	NEU1	835
ENSDARG00000036371	512	ENSDARG00000057882	409	ENSDARG00000077360	202	ENSDARG00000011665	138.261			ENSDARG00000002271	234	PARK7	833
ENSDARG00000035136	510	ENSDARG00000035519	407	ENSDARG00000027065	202	ENSDARG00000056549	137.823			ENSDARG00000006399	234	YWHAQ	830
ENSDARG00000002790	508	ENSDARG00000060041	406	ENSDARG00000070959	202	ENSDARG00000055115	137.78			ENSDARG00000068436	234	NDUFC1	829
ENSDARG00000056167	508	ENSDARG00000099241	405	ENSDARG00000017891	201	ENSDARG00000039346	137.401			ENSDARG00000042620	234	TMEM66	828
ENSDARG00000076126	507	ENSDARG00000101794	404	ENSDARG00000019949	200	ENSDARG00000102115	136.878			ENSDARG00000077467	233	ATP5O	828
ENSDARG00000019644	506	ENSDARG00000026369	403	ENSDARG00000093058	199	ENSDARG00000102640	136.865			ENSDARG00000097102	233	DBI	826
ENSDARG00000070472	504	ENSDARG00000101813	401	ENSDARG00000013938	199	ENSDARG00000100020	136.619			ENSDARG00000002791	232	DAD1	826
ENSDARG00000092546	502	ENSDARG00000023963	401	ENSDARG00000103566	199	ENSDARG00000006370	136.135			ENSDARG00000043963	232	MINOS1	824
ENSDARG00000058128	500	ENSDARG00000020261	399	ENSDARG00000069583	199	ENSDARG00000006399	136.082			ENSDARG00000015164	231	PSMA7	822
ENSDARG00000010481	500	ENSDARG00000039208	399	ENSDARG00000042933	199	ENSDARG00000099510	135.992			ENSDARG00000075989	231	ITGB1	820
ENSDARG00000035622	498	ENSDARG00000100446	399	ENSDARG00000076290	198	ENSDARG00000027744	135.638			ENSDARG00000029443	231	TMED10	820
ENSDARG00000013938	496	ENSDARG00000099663	399	ENSDARG00000011648	198	ENSDARG00000077776	135.525			ENSDARG00000030449	231	MARCKSL1	818
ENSDARG00000042539	496	ENSDARG00000014536	399	ENSDARG00000045758	196	ENSDARG00000019332	134.42			ENSDARG00000003732	230	HNRNPU	814
ENSDARG00000021252	495	ENSDARG00000034240	398	ENSDARG00000090228	195	ENSDARG00000035924	134.332			ENSDARG00000041400	230	MXI1	813
ENSDARG00000026908	494	ENSDARG00000003429	398	ENSDARG00000055115	195	ENSDARG00000043848	133.699			ENSDARG00000091079	230	WBP5	812
ENSDARG00000060756	494	ENSDARG00000003526	397	ENSDARG00000023963	195	ENSDARG00000041400	133.606			ENSDARG00000040257	229	UQCR11	810
ENSDARG00000076815	492	ENSDARG00000037188	397	ENSDARG00000003732	194	ENSDARG00000042620	133.092			ENSDARG00000045359	228	ATP6V0E1	805
ENSDARG00000070046	492	ENSDARG00000104267	396	ENSDARG00000037229	194	ENSDARG00000021059	132.918			ENSDARG00000011611	228	GABARAPL2	805
ENSDARG00000038076	490	ENSDARG00000032296	396	ENSDARG00000006840	194	ENSDARG00000029818	132.88			ENSDARG00000017772	227	FAM133B	801
ENSDARG00000089806	489	ENSDARG00000070046	395	ENSDARG00000040440	194	ENSDARG00000053381	132.578			ENSDARG00000056481	227	PLAT	801
ENSDARG00000078785	489	ENSDARG00000094426	395	ENSDARG00000045399	194	ENSDARG00000090697	132.172			ENSDARG00000099663	226	HSPH1	801
ENSDARG00000045914	488	ENSDARG00000007184	394	ENSDARG00000074552	193	ENSDARG00000003695	132.021			ENSDARG00000059298	225	HMGN2	798
ENSDARG00000058328	488	ENSDARG00000089976	393	ENSDARG00000099563	192	ENSDARG00000021984	131.93			ENSDARG00000005162	225	COX7B	796
ENSDARG00000052178	487	ENSDARG00000077620	393	ENSDARG00000058463	191	ENSDARG00000043484	131.611			ENSDARG00000007385	224	MTCH1	794
ENSDARG00000098574	486	ENSDARG00000017741	393	ENSDARG00000096661	190	ENSDARG00000103718	131.599			ENSDARG00000100990	223	CRTAC1	790
ENSDARG00000035043	485	ENSDARG00000026165	393	ENSDARG00000044299	190	ENSDARG00000035914	131.508			ENSDARG00000075758	222	S100A4	785
ENSDARG00000097478	485	ENSDARG00000070545	392	ENSDARG00000059323	189	ENSDARG00000086618	131.253			ENSDARG00000032296	222	MCL1	782
ENSDARG00000076120	484	ENSDARG00000009822	392	ENSDARG00000020143	188	ENSDARG00000010032	131.197			ENSDARG00000039117	221	EIF3F	782
ENSDARG00000038066	483	ENSDARG00000035325	391	ENSDARG00000038075	188	ENSDARG00000007693	130.793			ENSDARG00000004948	221	NDUFB4	780
ENSDARG00000099663	483	ENSDARG00000075559	390	ENSDARG00000086699	188	ENSDARG00000040314	130.685			ENSDARG00000052783	221	SEC61B	780
ENSDARG00000077226	480	ENSDARG00000007745	389	ENSDARG00000080010	188	ENSDARG00000035470	130.398			ENSDARG00000101082	221	PRDX5	780
ENSDARG00000043795	480	ENSDARG00000038205	389	ENSDARG00000087697	188	ENSDARG00000070426	129.697			ENSDARG00000101127	221	SRSF5	780
ENSDARG00000068974	480	ENSDARG00000031795	387	ENSDARG00000016855	186	ENSDARG00000099664	128.971			ENSDARG00000053269	220	PTTG1IP	776
ENSDARG00000020298	479	ENSDARG00000021811	386	ENSDARG00000020448	186	ENSDARG00000019231	128.717			ENSDARG00000016173	220	GSTM3	773
ENSDARG00000095743	476	ENSDARG00000035136	385	ENSDARG00000028198	186	ENSDARG00000005230	128.587			ENSDARG00000036107	220	CHL1	773
ENSDARG00000060682	475	ENSDARG00000009753	384	ENSDARG00000056582	184	ENSDARG00000073696	128.307			ENSDARG00000039346	218	KRT10	770
ENSDARG00000093584	475	ENSDARG00000101915	382	ENSDARG00000100990	183	ENSDARG00000103566	127.522			ENSDARG00000013863	218	ATP5G3	769
ENSDARG00000006290	475	ENSDARG00000019644	382	ENSDARG00000103846	183	ENSDARG00000092115	127.37			ENSDARG00000007098	217	BSG	768
ENSDARG00000044601	471	ENSDARG00000020708	381	ENSDARG00000020298	183	ENSDARG00000007708	127.02			ENSDARG00000030694	216	SPCS2	766
ENSDARG00000089626	471	ENSDARG00000020465	380	ENSDARG00000056480	182	ENSDARG00000099313	126.181			ENSDARG00000098813	216	RNH1	764
ENSDARG00000057912	470	ENSDARG00000045352	380	ENSDARG00000102452	182	ENSDARG00000035557	125.977			ENSDARG00000021252	216	SERBP1	763
ENSDARG00000045618	467	ENSDARG00000043608	379	ENSDARG00000099281	181	ENSDARG00000034427	125.876			ENSDARG00000017891	216	NGFRAP1	760
ENSDARG00000026369	467	ENSDARG00000090454	378	ENSDARG00000100003	181	ENSDARG00000086957	125.81			ENSDARG00000099776	215	WDR74	760
ENSDARG00000009753	467	ENSDARG00000103566	378	ENSDARG00000043848	181	ENSDARG00000056583	125.685			ENSDARG00000101009	215	RSL24D1	760
ENSDARG00000045352	467	ENSDARG00000052178	377	ENSDARG00000039346	180	ENSDARG00000056995	125.599			ENSDARG00000067975	215	PSMB1	759
ENSDARG00000102640	467	ENSDARG00000092546	376	ENSDARG00000020187	180	ENSDARG00000097102	125.498			ENSDARG00000000690	214	MT1M	759
ENSDARG00000116164	466	ENSDARG00000009871	375	ENSDARG00000068996	180	ENSDARG00000041974	125.1			ENSDARG00000028198	214	YWHAB	758
ENSDARG00000020482	464	ENSDARG00000011146	375	ENSDARG00000044669	179	ENSDARG00000007818	124.988			ENSDARG00000075666	213	C6orf48	756
ENSDARG00000062152	463	ENSDARG00000076120	374	ENSDARG00000058128	178	ENSDARG00000044852	124.664			ENSDARG00000055120	213	NDUFB8	755
ENSDARG00000071573	462	ENSDARG00000076223	373	ENSDARG00000070867	178	ENSDARG00000017602	124.244			ENSDARG00000037962	213	MZT2B	750
ENSDARG00000036995	459	ENSDARG00000044601	372	ENSDARG00000075768	178	ENSDARG00000004406	123.535			ENSDARG00000002790	212	NSA2	750
ENSDARG00000015325	459	ENSDARG00000099312	369	ENSDARG00000021669	177	ENSDARG00000000069	123.342			ENSDARG00000044852	212	NFE2L2	749
ENSDARG00000023323	457	ENSDARG00000044565	368	ENSDARG00000090194	177	ENSDARG00000056028	123.307			ENSDARG00000102750	212	MAP1LC3B	749
ENSDARG00000100452	455	ENSDARG00000020482	367	ENSDARG00000078473	177	ENSDARG00000077082	123.278			ENSDARG00000030213	211	LAMTOR5	747
ENSDARG00000029064	454	ENSDARG00000035678	367	ENSDARG00000001578	177	ENSDARG00000028618	123.102			ENSDARG00000101849	209	NDUFA11	747
ENSDARG00000043457	454	ENSDARG00000052150	366	ENSDARG00000030213	177	ENSDARG00000041450	122.82			ENSDARG00000020924	208	C11orf31	745
ENSDARG00000038075	453	ENSDARG00000006290	366	ENSDARG00000010965	176	ENSDARG00000076667	122.78			ENSDARG00000027984	208	PPP1R10	742
ENSDARG00000063535	453	ENSDARG00000058349	365	ENSDARG00000009950	175	ENSDARG00000018328	122.664			ENSDARG00000102105	207	CNN3	740
ENSDARG00000103566	450	ENSDARG00000076815	365	ENSDARG00000035043	175	ENSDARG00000044565	122.425			ENSDARG00000023394	207	CITED2	739
ENSDARG00000116617	448	ENSDARG00000009830	364	ENSDARG00000036427	175	ENSDARG00000003681	122.238			ENSDARG00000015757	207	IER5L	739
ENSDARG00000102978	447	ENSDARG00000038076	364	ENSDARG00000078741	175	ENSDARG00000093064	122.225			ENSDARG00000071670	207	PTEN	739
ENSDARG00000009822	447	ENSDARG00000103720	364	ENSDARG00000039830	174	ENSDARG00000013613	122.221			ENSDARG00000007347	206	TSPO	738
ENSDARG00000020465	446	ENSDARG00000071060	363	ENSDARG00000074246	174	ENSDARG00000060457	121.735			ENSDARG00000029663	206	AKAP12	737
ENSDARG00000037397	446	ENSDARG00000015325	361	ENSDARG00000097797	174	ENSDARG00000027899	121.528			ENSDARG00000045677	205	HNRNPC	737
ENSDARG00000043608	446	ENSDARG00000075989	361	ENSDARG00000012747	174	ENSDARG00000032606	121.23			ENSDARG00000046022	205	CDC42	736
ENSDARG00000088711	445	ENSDARG00000043531	361	ENSDARG00000102571	174	ENSDARG00000031681	121.063			ENSDARG00000068698	205	RHOC	733
ENSDARG00000089769	444	ENSDARG00000026489	360	ENSDARG00000010246	173	ENSDARG00000053446	121.009			ENSDARG00000053485	205	TRPM1	733
ENSDARG00000058349	443	ENSDARG00000012244	359	ENSDARG00000007385	173	ENSDARG00000021669	120.92			ENSDARG00000067717	204	SEC11A	731
ENSDARG00000028889	442	ENSDARG00000097478	359	ENSDARG00000031495	173	ENSDARG00000024278	120.835			ENSDARG00000035557	203	DST	729
ENSDARG00000009871	442	ENSDARG00000045618	357	ENSDARG00000021059	173	ENSDARG00000045359	120.574			ENSDARG00000019417	203	SOX10	729
ENSDARG00000024492	442	ENSDARG00000063535	356	ENSDARG00000058003	173	ENSDARG00000043608	120.511			ENSDARG00000043608	203	APOD	727
ENSDARG00000040534	441	ENSDARG00000014013	355	ENSDARG00000014329	172	ENSDARG00000053269	120.22			ENSDARG00000053468	202	GADD45A	722
ENSDARG00000009779	439	ENSDARG00000018961	354	ENSDARG00000044601	170	ENSDARG00000028889	120.197			ENSDARG00000056090	202	C14orf2	722
ENSDARG00000003681	438	ENSDARG00000089626	354	ENSDARG00000077082	170	ENSDARG00000058358	119.394			ENSDARG00000006242	202	NR4A2	721
ENSDARG00000004427	437	ENSDARG00000060682	353	ENSDARG00000058328	170	ENSDARG00000021811	119.326			ENSDARG00000059391	202	DYNLRB1	721
ENSDARG00000075709	437	ENSDARG00000005551	353	ENSDARG00000079305	169	ENSDARG00000033364	119.189			ENSDARG00000019332	202	NAMPT	720
ENSDARG00000070545	436	ENSDARG00000008243	351	ENSDARG00000052840	168	ENSDARG00000093058	118.601			ENSDARG00000058734	201	CALD1	718
ENSDARG00000041921	435	ENSDARG00000041391	351	ENSDARG00000070545	168	ENSDARG00000059654	118.522			ENSDARG00000056765	201	APLP2	717
ENSDARG00000030700	435	ENSDARG00000003486	350	ENSDARG00000029660	168	ENSDARG00000014793	118.339			ENSDARG00000026582	200	ARL6IP4	716
ENSDARG00000045928	435	ENSDARG00000023852	350	ENSDARG00000099453	167	ENSDARG00000104018	118.191			ENSDARG00000116491	200	DNAJB6	709
ENSDARG00000114670	434	ENSDARG00000035809	350	ENSDARG00000043467	167	ENSDARG00000105037	117.998			ENSDARG00000025554	199	EIF4A3	707
ENSDARG00000021107	433	ENSDARG00000076290	349	ENSDARG00000114516	166	ENSDARG00000032866	117.22			ENSDARG00000040971	199	MLPH	706
ENSDARG00000100133	433	ENSDARG00000104068	349	ENSDARG00000099241	166	ENSDARG00000022303	117.19			ENSDARG00000078386	198	CHPT1	705
ENSDARG00000070657	432	ENSDARG00000109510	348	ENSDARG00000057676	166	ENSDARG00000027154	117.181			ENSDARG00000043484	198	CDKN1C	704
ENSDARG00000089302	429	ENSDARG00000043976	346	ENSDARG00000042777	166	ENSDARG00000099729	117.102			ENSDARG00000000189	198	HEBP1	704
ENSDARG00000016548	428	ENSDARG00000026908	344	ENSDARG00000038608	165	ENSDARG00000045399	116.928			ENSDARG00000016470	197	COX7A2L	703
ENSDARG00000042245	427	ENSDARG00000002082	344	ENSDARG00000036080	164	ENSDARG00000005220	116.812			ENSDARG00000003808	195	BRK1	703
ENSDARG00000020261	427	ENSDARG00000021107	343	ENSDARG00000010710	164	ENSDARG00000053468	116.539			ENSDARG00000024877	195	NDUFB2	701
ENSDARG00000039914	426	ENSDARG00000044431	343	ENSDARG00000101082	164	ENSDARG00000116058	116.512			ENSDARG00000068265	195	MLF1	700
ENSDARG00000101915	423	ENSDARG00000021252	343	ENSDARG00000076602	164	ENSDARG00000016889	116.251			ENSDARG00000020448	195	MT1E	700
ENSDARG00000101707	423	ENSDARG00000114670	342	ENSDARG00000098059	164	ENSDARG00000075768	116.198			ENSDARG00000099420	195	PSMD8	700
ENSDARG00000071060	423	ENSDARG00000021582	342	ENSDARG00000008678	163	ENSDARG00000094300	116.137			ENSDARG00000099729	194	SUB1	698
ENSDARG00000099195	422	ENSDARG00000070867	341	ENSDARG00000009753	163	ENSDARG00000053979	115.963			ENSDARG00000075709	194	ARL2	697
ENSDARG00000109510	422	ENSDARG00000074758	340	ENSDARG00000098635	162	ENSDARG00000057912	115.238			ENSDARG00000092895	194	CANX	696
ENSDARG00000076223	420	ENSDARG00000074572	340	ENSDARG00000004782	161	ENSDARG00000046022	115.214			ENSDARG00000037488	194	PDIA6	695
ENSDARG00000003032	420	ENSDARG00000037997	338	ENSDARG00000103101	161	ENSDARG00000074849	115.088			ENSDARG00000055524	194	PCBP1	694
ENSDARG00000008243	420	ENSDARG00000103979	338	ENSDARG00000045359	160	ENSDARG00000009250	114.842			ENSDARG00000014303	194	UQCR10	694
ENSDARG00000094426	420	ENSDARG00000029445	338	ENSDARG00000007285	160	ENSDARG00000013938	114.826			ENSDARG00000096661	193	GNAI2	692
ENSDARG00000039208	419	ENSDARG00000028889	336	ENSDARG00000000069	160	ENSDARG00000057075	114.433			ENSDARG00000036830	193	SAMHD1	691
ENSDARG00000100446	419	ENSDARG00000096849	336	ENSDARG00000018562	159	ENSDARG00000101914	114.335			ENSDARG00000101461	193	ATP6V1B2	688
ENSDARG00000076290	419	ENSDARG00000056740	336	ENSDARG00000089626	159	ENSDARG00000068698	114.211			ENSDARG00000008706	192	C1orf63	687
ENSDARG00000035678	419	ENSDARG00000076836	335	ENSDARG00000045373	159	ENSDARG00000103800	113.655			ENSDARG00000039830	191	CYSTM1	687
ENSDARG00000057882	419	ENSDARG00000038075	335	ENSDARG00000033604	158	ENSDARG00000063095	112.84			ENSDARG00000044601	191	LAMP2	687
ENSDARG00000076509	416	ENSDARG00000041921	335	ENSDARG00000046022	158	ENSDARG00000035329	112.698			ENSDARG00000035751	191	GPRC5A	683
ENSDARG00000035325	416	ENSDARG00000041203	334	ENSDARG00000023852	158	ENSDARG00000011175	112.586			ENSDARG00000024278	191	DPYSL2	682
ENSDARG00000014499	416	ENSDARG00000030700	333	ENSDARG00000043180	158	ENSDARG00000056090	112.562			ENSDARG00000042840	191	BTG3	678
ENSDARG00000045155	415	ENSDARG00000105116	331	ENSDARG00000056331	157	ENSDARG00000059279	112.503			ENSDARG00000006215	189	RBMX	676
ENSDARG00000043631	411	ENSDARG00000054804	331	ENSDARG00000014915	156	ENSDARG00000036774	112.296			ENSDARG00000004406	189	SSR2	675
ENSDARG00000043976	411	ENSDARG00000000563	330	ENSDARG00000024877	156	ENSDARG00000036456	112.254			ENSDARG00000104066	189	NRXN1	673
ENSDARG00000090454	409	ENSDARG00000089663	330	ENSDARG00000016173	156	ENSDARG00000041391	111.525			ENSDARG00000038608	188	SEPW1	673
ENSDARG00000019398	408	ENSDARG00000045359	329	ENSDARG00000035890	156	ENSDARG00000071670	111.468			ENSDARG00000098591	188	IER5	671
ENSDARG00000041391	407	ENSDARG00000037879	329	ENSDARG00000015315	155	ENSDARG00000024771	111.369			ENSDARG00000032619	187	PA2G4	669
ENSDARG00000052150	406	ENSDARG00000057912	329	ENSDARG00000019398	155	ENSDARG00000027750	111.354			ENSDARG00000109510	187	PYURF	668
ENSDARG00000056090	406	ENSDARG00000037229	328	ENSDARG00000023323	155	ENSDARG00000021113	110.754			ENSDARG00000023988	187	ADIRF	668
ENSDARG00000087897	406	ENSDARG00000038835	328	ENSDARG00000013961	154	ENSDARG00000102191	110.174			ENSDARG00000032866	187	IRS2	665
ENSDARG00000017844	406	ENSDARG00000056090	327	ENSDARG00000026845	154	ENSDARG00000005612	109.608			ENSDARG00000020261	186	PTRF	665
ENSDARG00000020708	406	ENSDARG00000029064	327	ENSDARG00000036784	154	ENSDARG00000067975	109.472			ENSDARG00000058062	186	EIF3G	665
ENSDARG00000037965	405	ENSDARG00000075211	326	ENSDARG00000013804	153	ENSDARG00000002190	109.133			ENSDARG00000092947	186	LAMTOR4	664
ENSDARG00000014915	405	ENSDARG00000020258	326	ENSDARG00000035679	153	ENSDARG00000104451	108.95			ENSDARG00000014536	186	TKT	664
ENSDARG00000037997	404	ENSDARG00000009779	326	ENSDARG00000071060	153	ENSDARG00000023220	108.646			ENSDARG00000071060	186	TRA2B	662
ENSDARG00000054804	404	ENSDARG00000028213	324	ENSDARG00000017084	152	ENSDARG00000070824	108.42			ENSDARG00000006487	185	ATP5D	662
ENSDARG00000075559	403	ENSDARG00000014499	324	ENSDARG00000093313	152	ENSDARG00000020497	108.092			ENSDARG00000041875	185	RHEB	658
ENSDARG00000054823	403	ENSDARG00000037965	323	ENSDARG00000058041	152	ENSDARG00000006915	108.075			ENSDARG00000054696	185	FIS1	656
ENSDARG00000009881	401	ENSDARG00000041314	322	ENSDARG00000093448	152	ENSDARG00000015722	107.953			ENSDARG00000026801	185	VAMP2	655
ENSDARG00000009830	398	ENSDARG00000014017	322	ENSDARG00000115405	151	ENSDARG00000008678	107.897			ENSDARG00000006766	184	FADS3	653
ENSDARG00000087765	398	ENSDARG00000002403	321	ENSDARG00000018124	151	ENSDARG00000105116	107.865			ENSDARG00000053446	184	EPB41L4A-AS1	652
ENSDARG00000002082	397	ENSDARG00000003681	321	ENSDARG00000034427	150	ENSDARG00000099865	107.746			ENSDARG00000101560	184	H2AFX	652
ENSDARG00000010791	396	ENSDARG00000068457	320	ENSDARG00000061478	150	ENSDARG00000096829	107.655			ENSDARG00000092677	183	KLF2	652
ENSDARG00000035679	396	ENSDARG00000099039	320	ENSDARG00000035678	150	ENSDARG00000052712	107.434			ENSDARG00000069521	183	TMBIM4	651
ENSDARG00000029445	396	ENSDARG00000004906	319	ENSDARG00000019332	150	ENSDARG00000039647	107.176			ENSDARG00000027249	182	PLEKHA5	650
ENSDARG00000070688	395	ENSDARG00000068214	319	ENSDARG00000020008	149	ENSDARG00000020893	107.115			ENSDARG00000074758	182	UBXN1	649
ENSDARG00000011740	395	ENSDARG00000009881	319	ENSDARG00000030441	149	ENSDARG00000004621	107.023			ENSDARG00000104018	179	RSRC2	648
ENSDARG00000054696	394	ENSDARG00000015208	318	ENSDARG00000015757	149	ENSDARG00000089976	106.912			ENSDARG00000093058	178	S100A13	645
ENSDARG00000036754	393	ENSDARG00000011740	318	ENSDARG00000040072	148	ENSDARG00000035634	106.611			ENSDARG00000036036	178	EFHD1	644
ENSDARG00000110836	393	ENSDARG00000026726	317	ENSDARG00000008243	148	ENSDARG00000044601	106.349			ENSDARG00000015930	178	ARPC3	644
ENSDARG00000014013	392	ENSDARG00000102417	317	ENSDARG00000057484	148	ENSDARG00000028119	106.225			ENSDARG00000005230	178	HSPA9	642
ENSDARG00000089663	392	ENSDARG00000076509	316	ENSDARG00000015427	148	ENSDARG00000008867	106.195			ENSDARG00000035136	177	POMP	642
ENSDARG00000007099	391	ENSDARG00000034427	315	ENSDARG00000042533	147	ENSDARG00000058593	106.151			ENSDARG00000059610	176	RABAC1	642
ENSDARG00000045843	390	ENSDARG00000091656	315	ENSDARG00000087897	147	ENSDARG00000007323	105.882			ENSDARG00000096118	176	MIF	642
ENSDARG00000008502	390	ENSDARG00000039099	315	ENSDARG00000021984	147	ENSDARG00000009950	105.855			ENSDARG00000070824	176	HPGD	640
ENSDARG00000037229	389	ENSDARG00000101744	315	ENSDARG00000042469	146	ENSDARG00000058062	105.373			ENSDARG00000070404	176	DNAJB4	638
ENSDARG00000003695	388	ENSDARG00000054823	315	ENSDARG00000014817	146	ENSDARG00000062326	105.238			ENSDARG00000013979	176	CSRP1	638
ENSDARG00000102417	387	ENSDARG00000093156	315	ENSDARG00000014591	146	ENSDARG00000010965	105.197			ENSDARG00000040988	176	PGRMC1	635
ENSDARG00000010478	386	ENSDARG00000008049	313	ENSDARG00000043665	146	ENSDARG00000024877	105.144			ENSDARG00000009505	175	PYGL	635
ENSDARG00000044565	385	ENSDARG00000036995	311	ENSDARG00000014171	146	ENSDARG00000020448	104.964			ENSDARG00000104227	175	SAT2	634
ENSDARG00000042252	385	ENSDARG00000093584	308	ENSDARG00000016871	145	ENSDARG00000037789	104.926			ENSDARG00000078748	175	DDX17	634
ENSDARG00000019332	385	ENSDARG00000016548	307	ENSDARG00000027750	145	ENSDARG00000099129	104.763			ENSDARG00000027899	175	GUK1	633
ENSDARG00000099039	383	ENSDARG00000007099	307	ENSDARG00000003570	144	ENSDARG00000014303	104.655			ENSDARG00000021984	175	CTSZ	633
ENSDARG00000008936	383	ENSDARG00000006242	307	ENSDARG00000016733	144	ENSDARG00000013333	104.558			ENSDARG00000037153	175	ODC1	632
ENSDARG00000029663	382	ENSDARG00000054980	306	ENSDARG00000054804	144	ENSDARG00000059177	103.94			ENSDARG00000102558	174	MAFF	632
ENSDARG00000016754	382	ENSDARG00000087554	306	ENSDARG00000016687	143	ENSDARG00000009280	103.897			ENSDARG00000055543	174	ANP32B	630
ENSDARG00000077620	380	ENSDARG00000004189	305	ENSDARG00000031044	143	ENSDARG00000017624	103.7			ENSDARG00000003486	173	NEDD8	630
ENSDARG00000089976	379	ENSDARG00000015722	305	ENSDARG00000102978	143	ENSDARG00000104809	103.698			ENSDARG00000002710	173	SNRPD2	630
ENSDARG00000054980	379	ENSDARG00000031427	305	ENSDARG00000071224	143	ENSDARG00000039872	103.572			ENSDARG00000038141	172	PRRC2C	629
ENSDARG00000045359	379	ENSDARG00000045928	304	ENSDARG00000021107	142	ENSDARG00000012244	103.551			ENSDARG00000034427	171	TOP1	629
ENSDARG00000026655	379	ENSDARG00000104837	302	ENSDARG00000015385	142	ENSDARG00000096661	103.183			ENSDARG00000044048	171	SHFM1	627
ENSDARG00000018961	378	ENSDARG00000038141	301	ENSDARG00000041974	142	ENSDARG00000012747	102.631			ENSDARG00000013628	171	TAF1D	627
ENSDARG00000023852	378	ENSDARG00000077126	301	ENSDARG00000062442	142	ENSDARG00000040158	102.469			ENSDARG00000045928	171	MTRNR2L1	626
ENSDARG00000021582	378	ENSDARG00000004713	301	ENSDARG00000039872	142	ENSDARG00000020454	102.32			ENSDARG00000020235	170	POLR2F	626
ENSDARG00000098059	378	ENSDARG00000071573	301	ENSDARG00000052178	142	ENSDARG00000063292	102.243			ENSDARG00000036774	169	TMEM176A	625
ENSDARG00000070867	377	ENSDARG00000054696	301	ENSDARG00000063921	142	ENSDARG00000008383	102.078			ENSDARG00000054272	169	UBL3	625
ENSDARG00000034240	377	ENSDARG00000052674	300	ENSDARG00000044852	141	ENSDARG00000002659	101.889			ENSDARG00000077776	168	STAT3	625
ENSDARG00000012244	377	ENSDARG00000052712	299	ENSDARG00000009250	141	ENSDARG00000045490	101.491			ENSDARG00000003681	168	MYEOV2	624
ENSDARG00000003429	377	ENSDARG00000056235	299	ENSDARG00000003860	141	ENSDARG00000109510	101.22			ENSDARG00000010250	167	SNCA	623
ENSDARG00000086699	376	ENSDARG00000023028	299	ENSDARG00000042660	141	ENSDARG00000102452	100.957			ENSDARG00000104470	167	NUDT4	622
ENSDARG00000021811	376	ENSDARG00000054578	298	ENSDARG00000056160	140	ENSDARG00000038068	100.903			ENSDARG00000076815	167	SEC61G	620
ENSDARG00000056438	375	ENSDARG00000103846	298	ENSDARG00000061854	140	ENSDARG00000101289	100.803			ENSDARG00000023318	167	ATP5H	618
ENSDARG00000074758	374	ENSDARG00000069619	297	ENSDARG00000045776	140	ENSDARG00000035043	100.735			ENSDARG00000038068	166	AES	617
ENSDARG00000075989	374	ENSDARG00000070386	296	ENSDARG00000069920	139	ENSDARG00000007989	100.637			ENSDARG00000105116	166	TUBB2A	616
ENSDARG00000020133	373	ENSDARG00000045843	294	ENSDARG00000004261	139	ENSDARG00000027141	100.07			ENSDARG00000055868	166	RBBP6	616
ENSDARG00000044431	371	ENSDARG00000092467	294	ENSDARG00000039882	139					ENSDARG00000053684	166	SF3B14	615
ENSDARG00000026489	370	ENSDARG00000043457	294	ENSDARG00000061985	138					ENSDARG00000102482	166	TRMT112	614
ENSDARG00000037285	368	ENSDARG00000040121	294	ENSDARG00000034240	138					ENSDARG00000075768	166	SPARCL1	613
ENSDARG00000033789	366	ENSDARG00000101216	294	ENSDARG00000002523	138					ENSDARG00000026712	165	ISCU	612
ENSDARG00000087554	366	ENSDARG00000094673	293	ENSDARG00000043865	138					ENSDARG00000062338	165	TFAP2A	611
ENSDARG00000038835	365	ENSDARG00000098059	293	ENSDARG00000019998	138					ENSDARG00000007276	164	ATP5J2	611
ENSDARG00000077811	365	ENSDARG00000003032	292	ENSDARG00000046132	137					ENSDARG00000009280	163	TACC1	610
ENSDARG00000103163	363	ENSDARG00000018049	292	ENSDARG00000104227	136					ENSDARG00000069846	163	AP2M1	607
ENSDARG00000041314	363	ENSDARG00000059303	292	ENSDARG00000003429	136					ENSDARG00000060489	163	METTL9	607
ENSDARG00000004189	362	ENSDARG00000014915	291	ENSDARG00000037361	136					ENSDARG00000098059	163	MTDH	606
ENSDARG00000004948	362	ENSDARG00000090872	291	ENSDARG00000071573	136					ENSDARG00000093448	162	CCT4	605
ENSDARG00000005451	361	ENSDARG00000043257	291	ENSDARG00000030700	136					ENSDARG00000033179	161	SERP1	603
ENSDARG00000041203	360	ENSDARG00000017844	291	ENSDARG00000013966	136					ENSDARG00000017441	160	TCF25	603
ENSDARG00000096003	359	ENSDARG00000010791	290	ENSDARG00000109510	135					ENSDARG00000012458	160	FXR1	602
ENSDARG00000063922	359	ENSDARG00000040158	290	ENSDARG00000039150	135					ENSDARG00000028889	160	ATP5A1	600
ENSDARG00000037879	358	ENSDARG00000101362	289	ENSDARG00000020454	135					ENSDARG00000056725	160	C4orf3	599
ENSDARG00000020258	357	ENSDARG00000063922	289	ENSDARG00000086881	134					ENSDARG00000020497	160	SPTBN1	598
ENSDARG00000040118	357	ENSDARG00000045155	288	ENSDARG00000053684	134					ENSDARG00000031819	160	C8orf4	598
ENSDARG00000026072	357	ENSDARG00000015524	287	ENSDARG00000071336	134					ENSDARG00000014230	160	CTGF	597
ENSDARG00000008049	357	ENSDARG00000076321	287	ENSDARG00000014106	134					ENSDARG00000021647	159	LTBP4	597
ENSDARG00000041925	356	ENSDARG00000004956	287	ENSDARG00000067717	134					ENSDARG00000014329	159	APOC1	594
ENSDARG00000056235	355	ENSDARG00000059337	287	ENSDARG00000021252	134					ENSDARG00000021488	159	CTNNA1	593
ENSDARG00000006242	354	ENSDARG00000004948	286	ENSDARG00000052304	133					ENSDARG00000040184	159	CDKN1A	592
ENSDARG00000052712	352	ENSDARG00000103163	286	ENSDARG00000069850	133					ENSDARG00000029036	159	KLF9	592
ENSDARG00000076836	352	ENSDARG00000008936	286	ENSDARG00000040822	133					ENSDARG00000045776	159	GHITM	592
ENSDARG00000025554	351	ENSDARG00000105293	286	ENSDARG00000099197	133					ENSDARG00000007241	158	EIF3D	592
ENSDARG00000005551	351	ENSDARG00000019332	286	ENSDARG00000009779	133					ENSDARG00000041974	158	C19orf53	590
ENSDARG00000058463	350	ENSDARG00000017772	285	ENSDARG00000014536	133					ENSDARG00000099039	157	HIPK2	589
ENSDARG00000040121	350	ENSDARG00000100129	285	ENSDARG00000076799	133					ENSDARG00000052712	156	SSR4	589
ENSDARG00000036625	349	ENSDARG00000024877	285	ENSDARG00000037318	133					ENSDARG00000008494	156	NBL1	588
ENSDARG00000035625	349	ENSDARG00000019398	284	ENSDARG00000013976	133					ENSDARG00000033683	156	IL6ST	587
ENSDARG00000023028	349	ENSDARG00000006395	284	ENSDARG00000044565	132					ENSDARG00000021343	156	LAMP1	586
ENSDARG00000006200	348	ENSDARG00000063626	282	ENSDARG00000006514	132					ENSDARG00000057167	156	EIF5A	585
ENSDARG00000074001	348	ENSDARG00000008502	282	ENSDARG00000042539	132					ENSDARG00000021443	156	NUDC	584
ENSDARG00000091656	347	ENSDARG00000004049	282	ENSDARG00000054271	132					ENSDARG00000025338	155	CTSF	584
ENSDARG00000077360	346	ENSDARG00000027249	281	ENSDARG00000017772	131					ENSDARG00000017775	155	QKI	582
ENSDARG00000011166	345	ENSDARG00000063921	281	ENSDARG00000027590	131					ENSDARG00000013613	154	RARRES2	582
ENSDARG00000007836	345	ENSDARG00000029663	280	ENSDARG00000045914	131					ENSDARG00000005049	154	TCEB1	582
ENSDARG00000043371	345	ENSDARG00000102798	280	ENSDARG00000089681	131					ENSDARG00000028327	154	ATOX1	581
ENSDARG00000101216	345	ENSDARG00000058463	279	ENSDARG00000003526	131					ENSDARG00000035329	153	HSBP1	579
ENSDARG00000103799	344	ENSDARG00000078118	279	ENSDARG00000023299	131					ENSDARG00000005191	153	NHP2L1	579
ENSDARG00000055527	344	ENSDARG00000032651	279	ENSDARG00000023220	131					ENSDARG00000056028	153	SIK1	578
ENSDARG00000074572	344	ENSDARG00000104901	278	ENSDARG00000100452	131					ENSDARG00000014428	153	RASD1	577
ENSDARG00000027249	343	ENSDARG00000091563	278	ENSDARG00000003681	131					ENSDARG00000055115	153	TSC22D1	574
ENSDARG00000098832	343	ENSDARG00000044573	277	ENSDARG00000036675	131					ENSDARG00000092115	152	TALDO1	573
ENSDARG00000056307	341	ENSDARG00000006200	276	ENSDARG00000037259	130					ENSDARG00000068978	152	WDR83OS	573
ENSDARG00000069619	340	ENSDARG00000033789	275	ENSDARG00000099313	130					ENSDARG00000041450	152	PRKAR1A	571
ENSDARG00000078118	340	ENSDARG00000104066	275	ENSDARG00000079687	130					ENSDARG00000025693	151	CSNK1A1	570
ENSDARG00000062592	340	ENSDARG00000086699	275	ENSDARG00000099175	130					ENSDARG00000103824	151	N4BP2L2	570
ENSDARG00000010194	339	ENSDARG00000060695	275	ENSDARG00000043483	130					ENSDARG00000077082	151	NASP	569
ENSDARG00000068214	339	ENSDARG00000078654	275	ENSDARG00000013430	130					ENSDARG00000093406	151	LRPAP1	569
ENSDARG00000035751	338	ENSDARG00000005451	274	ENSDARG00000069388	129					ENSDARG00000004427	150	CHCHD10	568
ENSDARG00000041155	338	ENSDARG00000104431	274	ENSDARG00000019496	129					ENSDARG00000011125	150	CRYL1	566
ENSDARG00000043665	338	ENSDARG00000069910	273	ENSDARG00000076815	129					ENSDARG00000054723	150	RP11-93B14.5	566
ENSDARG00000075211	337	ENSDARG00000096003	273	ENSDARG00000011272	128					ENSDARG00000058730	150	RND3	564
ENSDARG00000101037	337	ENSDARG00000002369	272	ENSDARG00000092895	128					ENSDARG00000053990	149	PDCD4	564
ENSDARG00000020008	337	ENSDARG00000033655	271	ENSDARG00000023472	128					ENSDARG00000029445	149	SLIRP	564
ENSDARG00000007216	337	ENSDARG00000042876	271	ENSDARG00000029036	128					ENSDARG00000056549	148	SRRM1	563
ENSDARG00000014017	336	ENSDARG00000038635	270	ENSDARG00000007184	128					ENSDARG00000056307	148	YWHAZ	563
ENSDARG00000004713	335	ENSDARG00000102571	270	ENSDARG00000012513	128					ENSDARG00000099865	148	CTNNAL1	563
ENSDARG00000102832	335	ENSDARG00000075709	269	ENSDARG00000022509	128					ENSDARG00000068262	147	ST3GAL4	563
ENSDARG00000093156	335	ENSDARG00000010478	269	ENSDARG00000023028	128					ENSDARG00000057299	147	FLNA	562
ENSDARG00000004906	334	ENSDARG00000041155	268	ENSDARG00000030703	127					ENSDARG00000016516	147	LONP2	561
ENSDARG00000055678	334	ENSDARG00000077732	267	ENSDARG00000020847	127					ENSDARG00000043467	146	ATP6AP2	560
ENSDARG00000070834	334	ENSDARG00000025391	267	ENSDARG00000010553	127					ENSDARG00000026908	146	CAPN3	559
ENSDARG00000004452	334	ENSDARG00000011094	267	ENSDARG00000070046	127					ENSDARG00000042777	146	PDLIM3	558
ENSDARG00000007285	333	ENSDARG00000040041	267	ENSDARG00000101619	127					ENSDARG00000045180	146	XRCC5	555
ENSDARG00000038141	332	ENSDARG00000015314	266	ENSDARG00000074378	126					ENSDARG00000040314	146	HLA-DRB1	555
ENSDARG00000057683	332	ENSDARG00000040031	266	ENSDARG00000017624	126					ENSDARG00000100826	146	SNRPG	553
ENSDARG00000020232	332	ENSDARG00000005560	266	ENSDARG00000003641	126					ENSDARG00000024276	146	MRPL33	552
ENSDARG00000033539	332	ENSDARG00000007863	266	ENSDARG00000057075	126					ENSDARG00000019438	146	FSTL3	552
ENSDARG00000012881	331	ENSDARG00000038559	266	ENSDARG00000012820	126					ENSDARG00000020795	145	ANGPTL4	550
ENSDARG00000104901	331	ENSDARG00000043631	265	ENSDARG00000002831	125					ENSDARG00000004706	145	HMGN1	549
ENSDARG00000005576	331	ENSDARG00000076526	265	ENSDARG00000039914	125					ENSDARG00000071697	145	KMT2E	547
ENSDARG00000006408	331	ENSDARG00000035679	265	ENSDARG00000041450	125					ENSDARG00000010032	145	SYF2	546
ENSDARG00000102798	331	ENSDARG00000019529	265	ENSDARG00000037153	125					ENSDARG00000021811	145	SF1	545
ENSDARG00000100003	330	ENSDARG00000015123	264	ENSDARG00000094210	124					ENSDARG00000035360	144	2002-09-01	544
ENSDARG00000070824	330	ENSDARG00000099306	263	ENSDARG00000045542	124					ENSDARG00000052073	144	EIF2S2	544
ENSDARG00000104066	330	ENSDARG00000030441	263	ENSDARG00000068978	124					ENSDARG00000057676	144	RSL1D1	542
ENSDARG00000057698	330	ENSDARG00000016754	263	ENSDARG00000070019	124					ENSDARG00000071336	144	SSU72	541
ENSDARG00000104431	329	ENSDARG00000003570	262	ENSDARG00000058354	123					ENSDARG00000102115	144	P4HB	541
ENSDARG00000057940	329	ENSDARG00000038576	262	ENSDARG00000057854	123					ENSDARG00000042133	144	SYNPR	540
ENSDARG00000099312	327	ENSDARG00000042252	262	ENSDARG00000070657	123					ENSDARG00000079687	143	C1QL1	540
ENSDARG00000063921	327	ENSDARG00000059323	261	ENSDARG00000061187	123					ENSDARG00000006290	143	CAMLG	539
ENSDARG00000079687	326	ENSDARG00000008947	260	ENSDARG00000063341	122					ENSDARG00000027590	142	NDUFB11	539
ENSDARG00000019004	326	ENSDARG00000116649	259	ENSDARG00000015575	122					ENSDARG00000027547	142	SRSF11	537
ENSDARG00000003486	324	ENSDARG00000010266	259	ENSDARG00000007682	122					ENSDARG00000110756	142	KIF5B	537
ENSDARG00000025391	324	ENSDARG00000014159	259	ENSDARG00000043663	122					ENSDARG00000036162	142	AKAP9	535
ENSDARG00000031427	324	ENSDARG00000057867	258	ENSDARG00000093117	122					ENSDARG00000043443	142	NDRG1	535
ENSDARG00000052674	324	ENSDARG00000059357	258	ENSDARG00000076283	122					ENSDARG00000023323	142	PHPT1	534
ENSDARG00000030441	323	ENSDARG00000006408	257	ENSDARG00000079280	121					ENSDARG00000099453	141	MRPL20	533
ENSDARG00000005191	322	ENSDARG00000016691	256	ENSDARG00000092954	121					ENSDARG00000035596	141	CD47	533
ENSDARG00000040314	322	ENSDARG00000099148	256	ENSDARG00000030012	121					ENSDARG00000090872	141	RDX	533
ENSDARG00000037177	321	ENSDARG00000007216	256	ENSDARG00000103979	121					ENSDARG00000075014	141	C14orf166	533
ENSDARG00000041065	321	ENSDARG00000058369	255	ENSDARG00000017844	121					ENSDARG00000044092	141	ATP6V1F	532
ENSDARG00000101744	320	ENSDARG00000055389	255	ENSDARG00000029072	121					ENSDARG00000013576	140	ATP6V0B	529
ENSDARG00000062025	319	ENSDARG00000041974	254	ENSDARG00000016239	121					ENSDARG00000013443	140	HNRNPD	529
ENSDARG00000015315	319	ENSDARG00000020454	254	ENSDARG00000037278	120					ENSDARG00000099730	140	EIF4H	529
ENSDARG00000063626	319	ENSDARG00000019004	254	ENSDARG00000054362	120					ENSDARG00000023532	140	DEK	528
ENSDARG00000042864	319	ENSDARG00000103754	254	ENSDARG00000069090	120					ENSDARG00000056233	139	NDUFB7	527
ENSDARG00000012603	319	ENSDARG00000101707	253	ENSDARG00000102417	120					ENSDARG00000068996	139	SLC25A33	526
ENSDARG00000013382	318	ENSDARG00000077360	253	ENSDARG00000008748	120					ENSDARG00000103101	139	TRA2A	526
ENSDARG00000097797	317	ENSDARG00000086842	253	ENSDARG00000102055	120					ENSDARG00000056583	139	ITGB1BP1	525
ENSDARG00000102571	317	ENSDARG00000044895	253	ENSDARG00000102482	120					ENSDARG00000097487	138	CAST	525
ENSDARG00000010770	316	ENSDARG00000074849	253	ENSDARG00000031681	119					ENSDARG00000008867	137	MAGED2	525
ENSDARG00000105116	316	ENSDARG00000067997	252	ENSDARG00000038615	119					ENSDARG00000056744	137	DDX24	525
ENSDARG00000070161	316	ENSDARG00000007971	252	ENSDARG00000015111	119					ENSDARG00000040158	137	CCT3	524
ENSDARG00000017772	315	ENSDARG00000006514	251	ENSDARG00000094695	119					ENSDARG00000042815	137	NDUFB9	524
ENSDARG00000044299	315	ENSDARG00000003153	251	ENSDARG00000104837	119					ENSDARG00000032369	137	ERH	523
ENSDARG00000031511	315	ENSDARG00000040503	251	ENSDARG00000009881	119					ENSDARG00000010481	137	TTR	523
ENSDARG00000067995	314	ENSDARG00000037488	250	ENSDARG00000074790	119					ENSDARG00000027200	137	ARPC2	521
ENSDARG00000015208	314	ENSDARG00000003695	249	ENSDARG00000070834	119					ENSDARG00000037980	136	ARF4	521
ENSDARG00000105293	314	ENSDARG00000077256	248	ENSDARG00000014763	118					ENSDARG00000010246	136	DNAJB9	520
ENSDARG00000103754	314	ENSDARG00000012553	248	ENSDARG00000055708	118					ENSDARG00000076120	136	PIK3R1	518
ENSDARG00000069920	313	ENSDARG00000040314	248	ENSDARG00000054155	118					ENSDARG00000097964	136	TCP1	518
ENSDARG00000014159	313	ENSDARG00000070824	247	ENSDARG00000025789	118					ENSDARG00000022456	136	EIF3A	518
ENSDARG00000090872	312	ENSDARG00000042864	246	ENSDARG00000069624	118					ENSDARG00000016754	135	ANKRD12	518
ENSDARG00000038635	312	ENSDARG00000070834	246	ENSDARG00000054793	117					ENSDARG00000094210	134	XIST	517
ENSDARG00000092467	312	ENSDARG00000070155	245	ENSDARG00000068820	117					ENSDARG00000089368	134	ARHGDIA	517
ENSDARG00000074552	312	ENSDARG00000005576	245	ENSDARG00000087443	117					ENSDARG00000022650	134	RPL22L1	516
ENSDARG00000012234	311	ENSDARG00000045146	245	ENSDARG00000099439	117					ENSDARG00000008678	134	NDUFS6	516
ENSDARG00000103594	311	ENSDARG00000011404	244	ENSDARG00000091656	116					ENSDARG00000098852	133	ATP5C1	516
ENSDARG00000013804	311	ENSDARG00000005191	243	ENSDARG00000004906	116					ENSDARG00000028067	133	TPM3	515
ENSDARG00000100513	310	ENSDARG00000102832	243	ENSDARG00000099039	116					ENSDARG00000079516	133	DDX21	514
ENSDARG00000008748	309	ENSDARG00000018124	243	ENSDARG00000098312	115					ENSDARG00000041391	133	COPE	512
ENSDARG00000020454	309	ENSDARG00000004452	243	ENSDARG00000025693	115					ENSDARG00000102744	133	ENY2	511
ENSDARG00000045490	307	ENSDARG00000033539	242	ENSDARG00000089663	115					ENSDARG00000016128	132	PIP4K2A	511
ENSDARG00000052304	306	ENSDARG00000018476	242	ENSDARG00000036754	115					ENSDARG00000030139	132	SNRPB	509
ENSDARG00000043531	306	ENSDARG00000012432	241	ENSDARG00000028048	114					ENSDARG00000024844	132	MANF	508
ENSDARG00000004956	306	ENSDARG00000103422	241	ENSDARG00000104066	114					ENSDARG00000039493	132	ATP1B3	508
ENSDARG00000016239	306	ENSDARG00000070656	241	ENSDARG00000070623	114					ENSDARG00000042660	132	NDUFA5	508
ENSDARG00000034427	305	ENSDARG00000098832	241	ENSDARG00000004427	113					ENSDARG00000103718	131	AGPAT2	508
ENSDARG00000037488	305	ENSDARG00000023532	241	ENSDARG00000034473	113					ENSDARG00000042853	131	GPR137B	507
ENSDARG00000007377	305	ENSDARG00000016260	240	ENSDARG00000029179	113					ENSDARG00000013966	131	EIF5B	506
ENSDARG00000020007	305	ENSDARG00000054907	240	ENSDARG00000028087	113					ENSDARG00000045373	131	COX17	506
ENSDARG00000019529	305	ENSDARG00000037503	240	ENSDARG00000069977	113					ENSDARG00000099510	131	PNISR	504
ENSDARG00000054616	304	ENSDARG00000040988	240	ENSDARG00000101127	113					ENSDARG00000009640	130	PAPOLA	504
ENSDARG00000077126	304	ENSDARG00000026072	240	ENSDARG00000020101	112					ENSDARG00000053097	130	PMEPA1	504
ENSDARG00000015524	304	ENSDARG00000030213	240	ENSDARG00000055216	112					ENSDARG00000000853	130	CTSK	502
ENSDARG00000018049	304	ENSDARG00000045490	239	ENSDARG00000039005	112					ENSDARG00000058463	129	SRP9	502
ENSDARG00000063100	304	ENSDARG00000079687	239	ENSDARG00000045978	111					ENSDARG00000060350	129	RGS16	501
ENSDARG00000027099	304	ENSDARG00000024478	239	ENSDARG00000038881	111					ENSDARG00000003573	129	BCYRN1	501
ENSDARG00000007971	303	ENSDARG00000031819	239	ENSDARG00000031819	111					ENSDARG00000007791	129	RBM25	501
ENSDARG00000015722	302	ENSDARG00000079949	238	ENSDARG00000039969	111					ENSDARG00000090389	129	CAPZB	500
ENSDARG00000057299	302	ENSDARG00000015990	238	ENSDARG00000002659	111					ENSDARG00000068434	129	CD55	500
ENSDARG00000037108	301	ENSDARG00000037361	238	ENSDARG00000026801	111					ENSDARG00000030700	129	SRSF9	500
ENSDARG00000030213	301	ENSDARG00000055678	238	ENSDARG00000045296	111					ENSDARG00000093549	128	ITGB4	500
ENSDARG00000056740	301	ENSDARG00000041065	237	ENSDARG00000100513	111					ENSDARG00000089681	128	MATR3	499
ENSDARG00000002403	300	ENSDARG00000039887	237	ENSDARG00000113599	110					ENSDARG00000044684	128	TMED2	499
ENSDARG00000070607	300	ENSDARG00000093313	237	ENSDARG00000027141	110					ENSDARG00000034503	127	ARPC1A	496
ENSDARG00000074849	299	ENSDARG00000057683	237	ENSDARG00000016128	110					ENSDARG00000014817	127	MYL9	496
ENSDARG00000024488	299	ENSDARG00000057940	237	ENSDARG00000014587	110					ENSDARG00000013822	127	VWA1	495
ENSDARG00000015930	299	ENSDARG00000058471	236	ENSDARG00000094673	110					ENSDARG00000039150	127	GNB2	494
ENSDARG00000059337	299	ENSDARG00000060115	236	ENSDARG00000055618	110					ENSDARG00000014676	127	HNRNPH2	494
ENSDARG00000074378	298	ENSDARG00000044299	236	ENSDARG00000034187	110					ENSDARG00000101181	127	MPHOSPH8	492
ENSDARG00000012405	298	ENSDARG00000042823	236	ENSDARG00000002710	110					ENSDARG00000090552	127	FAM53C	491
ENSDARG00000039887	298	ENSDARG00000099194	236	ENSDARG00000045402	110					ENSDARG00000015425	127	CUTA	490
ENSDARG00000038576	297	ENSDARG00000043371	235	ENSDARG00000007438	110					ENSDARG00000054804	127	CALM3	490
ENSDARG00000032102	296	ENSDARG00000039969	235	ENSDARG00000076509	109					ENSDARG00000057867	126	UFC1	489
ENSDARG00000086842	295	ENSDARG00000010008	235	ENSDARG00000059743	109					ENSDARG00000015887	126	GTF2B	487
ENSDARG00000069977	295	ENSDARG00000058041	234	ENSDARG00000086753	109					ENSDARG00000101199	126	XRCC6	487
ENSDARG00000014244	295	ENSDARG00000024488	234	ENSDARG00000015325	109					ENSDARG00000015649	126	SSB	486
ENSDARG00000011404	295	ENSDARG00000013804	234	ENSDARG00000003189	109					ENSDARG00000086618	126	TAF7	484
ENSDARG00000105223	294	ENSDARG00000010194	233	ENSDARG00000035625	108					ENSDARG00000040192	126	POLR2A	484
ENSDARG00000087693	294	ENSDARG00000069977	232	ENSDARG00000054063	108					ENSDARG00000027154	125	MDH1	483
ENSDARG00000060036	293	ENSDARG00000093448	232	ENSDARG00000068432	108					ENSDARG00000035914	125	IDI1	483
ENSDARG00000031819	293	ENSDARG00000043128	232	ENSDARG00000059646	108					ENSDARG00000069302	125	FKBP2	483
ENSDARG00000104837	293	ENSDARG00000062590	232	ENSDARG00000057414	107					ENSDARG00000037009	125	NDUFB10	483
ENSDARG00000013966	293	ENSDARG00000070475	232	ENSDARG00000027249	107					ENSDARG00000058128	124	ROMO1	483
ENSDARG00000055389	292	ENSDARG00000012603	232	ENSDARG00000036684	107					ENSDARG00000040606	124	LMO4	481
ENSDARG00000039041	292	ENSDARG00000100558	231	ENSDARG00000071426	107					ENSDARG00000074849	124	HBP1	481
ENSDARG00000037845	292	ENSDARG00000017299	231	ENSDARG00000004956	107					ENSDARG00000006497	124	SPCS1	480
ENSDARG00000070386	291	ENSDARG00000018524	231	ENSDARG00000020465	106					ENSDARG00000019353	124	ESD	480
ENSDARG00000070623	291	ENSDARG00000052139	230	ENSDARG00000007141	106					ENSDARG00000019081	124	FKBP8	480
ENSDARG00000040988	290	ENSDARG00000069013	230	ENSDARG00000030139	106					ENSDARG00000022509	124	RBX1	480
ENSDARG00000060115	289	ENSDARG00000018914	230	ENSDARG00000056903	106					ENSDARG00000007711	124	SRI	479
ENSDARG00000053395	289	ENSDARG00000063100	230	ENSDARG00000037009	106					ENSDARG00000028517	124	SSBP1	477
ENSDARG00000063341	288	ENSDARG00000020467	230	ENSDARG00000037559	106					ENSDARG00000035470	123	SUCLG1	476
ENSDARG00000044573	288	ENSDARG00000013382	229	ENSDARG00000070723	106					ENSDARG00000091348	123	NDUFAF3	476
ENSDARG00000003693	288	ENSDARG00000067717	229	ENSDARG00000025375	105					ENSDARG00000052842	123	PTMS	476
ENSDARG00000040031	287	ENSDARG00000001244	228	ENSDARG00000038835	105					ENSDARG00000038432	123	KCNMB4	475
ENSDARG00000039099	287	ENSDARG00000024204	228	ENSDARG00000037998	105					ENSDARG00000014915	122	PKM	475
ENSDARG00000059323	287	ENSDARG00000116058	228	ENSDARG00000019062	105					ENSDARG00000101908	122	MIDN	475
ENSDARG00000088984	287	ENSDARG00000075445	227	ENSDARG00000116058	105					ENSDARG00000024846	122	EIF3M	474
ENSDARG00000015123	287	ENSDARG00000101037	227	ENSDARG00000027310	105					ENSDARG00000036541	121	C1R	474
ENSDARG00000002589	286	ENSDARG00000074552	227	ENSDARG00000021973	104					ENSDARG00000027750	121	SGK1	473
ENSDARG00000040503	286	ENSDARG00000060679	227	ENSDARG00000104018	104					ENSDARG00000015325	121	VPS28	473
ENSDARG00000010266	286	ENSDARG00000008748	227	ENSDARG00000033179	104					ENSDARG00000020761	121	DPP7	472
ENSDARG00000054578	285	ENSDARG00000045230	227	ENSDARG00000039578	104					ENSDARG00000038835	121	LGALS3BP	472
ENSDARG00000042777	285	ENSDARG00000058479	226	ENSDARG00000003395	104					ENSDARG00000014571	121	C6orf62	471
ENSDARG00000003938	285	ENSDARG00000010878	226	ENSDARG00000007959	104					ENSDARG00000007438	121	BUD31	471
ENSDARG00000001244	285	ENSDARG00000037108	226	ENSDARG00000030957	104					ENSDARG00000096849	120	GS1-251I9.4	471
ENSDARG00000006395	285	ENSDARG00000043304	226	ENSDARG00000043608	104					ENSDARG00000039392	120	GDI2	471
ENSDARG00000003189	285	ENSDARG00000077264	225	ENSDARG00000090454	103					ENSDARG00000035282	120	UBA2	471
ENSDARG00000051923	284	ENSDARG00000032317	224	ENSDARG00000006242	103					ENSDARG00000069090	120	CAP1	470
ENSDARG00000003527	284	ENSDARG00000070161	224	ENSDARG00000058079	103					ENSDARG00000086699	120	ZEB2	470
ENSDARG00000075445	283	ENSDARG00000056307	224	ENSDARG00000058593	103					ENSDARG00000087402	120	GPX1	470
ENSDARG00000090268	283	ENSDARG00000011564	224	ENSDARG00000014222	103					ENSDARG00000087277	119	SPTSSA	470
ENSDARG00000060695	283	ENSDARG00000100513	224	ENSDARG00000041878	103					ENSDARG00000014646	119	REXO2	469
ENSDARG00000040041	283	ENSDARG00000036625	223	ENSDARG00000063177	103					ENSDARG00000099309	119	LINC00493	469
ENSDARG00000045230	283	ENSDARG00000021669	223	ENSDARG00000104726	102					ENSDARG00000010519	119	CYP27A1	468
ENSDARG00000059303	282	ENSDARG00000015930	223	ENSDARG00000076847	102					ENSDARG00000006370	118	UBE2D2	468
ENSDARG00000007863	282	ENSDARG00000037640	222	ENSDARG00000058179	102					ENSDARG00000102106	118	RWDD1	468
ENSDARG00000078654	282	ENSDARG00000057691	222	ENSDARG00000058044	102					ENSDARG00000014763	118	AHR	468
ENSDARG00000024478	281	ENSDARG00000002215	222	ENSDARG00000001975	102					ENSDARG00000079391	118	ADD3	468
ENSDARG00000058041	281	ENSDARG00000020232	221	ENSDARG00000039601	102					ENSDARG00000033655	118	PFDN2	467
ENSDARG00000042823	281	ENSDARG00000069093	221	ENSDARG00000042236	102					ENSDARG00000001057	118	TRIM63	466
ENSDARG00000018890	281	ENSDARG00000024844	221	ENSDARG00000104028	102					ENSDARG00000032131	118	UBE2R2	465
ENSDARG00000056583	281	ENSDARG00000071468	221	ENSDARG00000104030	102					ENSDARG00000099624	117	ABCA8	465
ENSDARG00000013863	281	ENSDARG00000035859	220	ENSDARG00000056235	102					ENSDARG00000053315	117	WDR1	463
ENSDARG00000018124	281	ENSDARG00000019941	220	ENSDARG00000027595	102					ENSDARG00000002758	117	CHD1	463
ENSDARG00000039880	281	ENSDARG00000075883	220	ENSDARG00000006408	102					ENSDARG00000044102	117	MLEC	463
ENSDARG00000094673	280	ENSDARG00000074790	220	ENSDARG00000044362	102					ENSDARG00000018985	116	PSME1	460
ENSDARG00000041974	280	ENSDARG00000037318	220	ENSDARG00000105177	101					ENSDARG00000059725	116	FAM101B	460
ENSDARG00000101362	280	ENSDARG00000054063	219	ENSDARG00000007989	101					ENSDARG00000100729	116	MTRNR2L2	459
ENSDARG00000023963	280	ENSDARG00000024651	219	ENSDARG00000040121	101					ENSDARG00000025789	116	ATPIF1	458
ENSDARG00000037980	279	ENSDARG00000015392	219	ENSDARG00000010266	101					ENSDARG00000041921	116	PUF60	458
ENSDARG00000016260	279	ENSDARG00000007285	219	ENSDARG00000078865	101					ENSDARG00000104726	115	CADM3	457
ENSDARG00000093448	279	ENSDARG00000071224	219	ENSDARG00000054290	100					ENSDARG00000021366	115	CLIP1	457
ENSDARG00000042337	279	ENSDARG00000042337	219	ENSDARG00000037789	100					ENSDARG00000099439	115	UBE2I	457
ENSDARG00000077732	278	ENSDARG00000037559	219	ENSDARG00000041203	100					ENSDARG00000014159	115	SPAG9	456
ENSDARG00000024877	278	ENSDARG00000002790	218	ENSDARG00000057299	100					ENSDARG00000098304	115	KHDRBS1	455
ENSDARG00000056531	278	ENSDARG00000035914	218	ENSDARG00000035914	100					ENSDARG00000116058	115	ZFYVE16	455
ENSDARG00000069116	277	ENSDARG00000025554	218	ENSDARG00000027099	100					ENSDARG00000001889	115	DDT	455
ENSDARG00000057853	277	ENSDARG00000033364	218	ENSDARG00000034753	100					ENSDARG00000008785	115	CAMTA1	454
ENSDARG00000103979	277	ENSDARG00000075622	218	ENSDARG00000031795	100					ENSDARG00000045847	114	DUT	453
ENSDARG00000039007	277	ENSDARG00000057698	218	ENSDARG00000102744	100					ENSDARG00000074246	114	HMGA1	452
ENSDARG00000100129	276	ENSDARG00000018890	218	ENSDARG00000016153	100					ENSDARG00000068030	114	HMGN3	452
ENSDARG00000103422	276	ENSDARG00000096661	217	ENSDARG00000014898	100					ENSDARG00000099306	114	PLIN2	452
ENSDARG00000069910	275	ENSDARG00000029406	217							ENSDARG00000003008	114	COL18A1	452
ENSDARG00000086411	275	ENSDARG00000104682	217							ENSDARG00000096678	114	PIR	451
ENSDARG00000026183	275	ENSDARG00000058504	217							ENSDARG00000036704	114	VEGFB	451
ENSDARG00000116058	275	ENSDARG00000099439	217							ENSDARG00000102070	113	TNFAIP6	449
ENSDARG00000015889	274	ENSDARG00000006837	217							ENSDARG00000044669	113	PPIG	449
ENSDARG00000042458	274	ENSDARG00000035329	216							ENSDARG00000021372	113	DNAJB11	449
ENSDARG00000116649	274	ENSDARG00000039980	216							ENSDARG00000077850	113	METAP2	449
ENSDARG00000096661	273	ENSDARG00000052304	215							ENSDARG00000090912	113	SRSF6	449
ENSDARG00000035859	273	ENSDARG00000002589	215							ENSDARG00000039882	113	CAPNS1	449
ENSDARG00000015314	273	ENSDARG00000028327	215							ENSDARG00000002190	112	MFSD12	448
ENSDARG00000030949	273	ENSDARG00000063341	213							ENSDARG00000045524	112	CCT7	447
ENSDARG00000037559	273	ENSDARG00000038768	213							ENSDARG00000111939	112	VDAC1	447
ENSDARG00000032317	272	ENSDARG00000029524	213							ENSDARG00000022129	112	NOL7	447
ENSDARG00000045146	272	ENSDARG00000058656	213							ENSDARG00000043009	112	TUBB	447
ENSDARG00000039969	272	ENSDARG00000003693	213							ENSDARG00000103543	112	PCMT1	447
ENSDARG00000038559	272	ENSDARG00000054911	213							ENSDARG00000098853	112	CHMP2A	447
ENSDARG00000059357	271	ENSDARG00000087640	213							ENSDARG00000007697	112	BPTF	446
ENSDARG00000035329	270	ENSDARG00000018618	212							ENSDARG00000061338	112	KLHL21	446
ENSDARG00000015990	270	ENSDARG00000103824	212							ENSDARG00000003931	112	SH3BGRL	446
ENSDARG00000067717	270	ENSDARG00000089681	212							ENSDARG00000006397	112	VCP	446
ENSDARG00000004049	270	ENSDARG00000012078	212							ENSDARG00000037259	111	PHB2	446
ENSDARG00000091563	270	ENSDARG00000035694	212							ENSDARG00000036658	111	SPG20	446
ENSDARG00000055868	269	ENSDARG00000036107	212							ENSDARG00000101915	111	PABPC4	445
ENSDARG00000090462	269	ENSDARG00000053395	212							ENSDARG00000044605	111	HP1BP3	444
ENSDARG00000020467	269	ENSDARG00000009534	211							ENSDARG00000056480	111	C1orf43	444
ENSDARG00000103846	268	ENSDARG00000013863	211							ENSDARG00000004588	111	ARGLU1	444
ENSDARG00000008947	268	ENSDARG00000019335	210							ENSDARG00000035858	110	ACTN4	444
ENSDARG00000011094	268	ENSDARG00000100020	210							ENSDARG00000095908	110	SF3B1	443
ENSDARG00000002215	268	ENSDARG00000057299	210							ENSDARG00000039268	110	TMEM50A	442
ENSDARG00000074790	268	ENSDARG00000039543	210							ENSDARG00000093844	110	PHC2	442
ENSDARG00000100558	267	ENSDARG00000023220	210							ENSDARG00000058041	110	CPEB2	442
ENSDARG00000059373	267	ENSDARG00000038505	210							ENSDARG00000016200	110	SLC25A4	442
ENSDARG00000004261	266	ENSDARG00000016239	210							ENSDARG00000034616	110	SYPL1	442
ENSDARG00000037318	266	ENSDARG00000103799	209							ENSDARG00000036942	110	MEG3	442
ENSDARG00000026726	265	ENSDARG00000003527	209							ENSDARG00000039682	110	MFGE8	442
ENSDARG00000035914	265	ENSDARG00000037392	209							ENSDARG00000015722	109	SIAH1	442
ENSDARG00000024047	265	ENSDARG00000015759	209							ENSDARG00000010727	109	CCL2	442
ENSDARG00000077264	263	ENSDARG00000042777	208							ENSDARG00000086332	109	PPP1CB	441
ENSDARG00000025147	263	ENSDARG00000103594	208							ENSDARG00000037229	109	MDH2	441
ENSDARG00000043716	262	ENSDARG00000004261	208							ENSDARG00000098075	109	ZNF706	441
ENSDARG00000012274	262	ENSDARG00000059373	208							ENSDARG00000012820	109	LAMTOR1	441
ENSDARG00000025332	261	ENSDARG00000012777	208							ENSDARG00000062003	109	OAT	440
ENSDARG00000012777	261	ENSDARG00000029248	207							ENSDARG00000014171	109	SEC11C	440
ENSDARG00000019941	260	ENSDARG00000051923	207							ENSDARG00000045402	109	SNRPB2	440
ENSDARG00000015385	259	ENSDARG00000055283	207							ENSDARG00000018060	108	CDC37	440
ENSDARG00000075883	259	ENSDARG00000025332	207							ENSDARG00000100376	108	BZW1	439
ENSDARG00000018989	259	ENSDARG00000019507	206							ENSDARG00000070472	108	DHX36	439
ENSDARG00000070656	259	ENSDARG00000014366	206							ENSDARG00000061757	108	BLVRB	439
ENSDARG00000071468	259	ENSDARG00000061764	206							ENSDARG00000056122	108	BNIP3L	438
ENSDARG00000043467	258	ENSDARG00000009544	206							ENSDARG00000013976	108	JTB	437
ENSDARG00000059398	258	ENSDARG00000002659	206							ENSDARG00000078619	107	PSMA3	437
ENSDARG00000098507	257	ENSDARG00000055708	205							ENSDARG00000105037	107	CHURC1	437
ENSDARG00000077405	257	ENSDARG00000008097	205							ENSDARG00000043493	107	GABARAP	437
ENSDARG00000015759	256	ENSDARG00000090228	205							ENSDARG00000058225	107	KDSR	437
ENSDARG00000001057	256	ENSDARG00000070674	204							ENSDARG00000053979	107	PTP4A2	436
ENSDARG00000022456	256	ENSDARG00000046132	204							ENSDARG00000057075	107	SERPINB6	436
ENSDARG00000003570	255	ENSDARG00000056531	204							ENSDARG00000042837	107	RAP1B	436
ENSDARG00000089681	255	ENSDARG00000027099	203							ENSDARG00000004956	107	PHB	436
ENSDARG00000044092	255	ENSDARG00000039007	202							ENSDARG00000068478	107	PSMB6	435
ENSDARG00000055133	255	ENSDARG00000039880	202							ENSDARG00000019130	106	NOP56	435
ENSDARG00000019924	254	ENSDARG00000030949	201							ENSDARG00000069920	106	GYPC	434
ENSDARG00000002369	254	ENSDARG00000042469	200							ENSDARG00000020328	106	CLK1	434
ENSDARG00000099148	254	ENSDARG00000035625	200							ENSDARG00000070426	106	CCT2	434
ENSDARG00000054907	254	ENSDARG00000010770	200							ENSDARG00000005172	106	SF3B5	433
ENSDARG00000032651	254	ENSDARG00000007836	200							ENSDARG00000101619	106	ERBB3	432
ENSDARG00000037038	254	ENSDARG00000012747	200							ENSDARG00000098627	105	EIF3I	431
ENSDARG00000018461	254	ENSDARG00000071878	200							ENSDARG00000052429	105	COX5A	431
ENSDARG00000019507	253	ENSDARG00000035427	199							ENSDARG00000101813	105	ST6GALNAC2	431
ENSDARG00000023220	253	ENSDARG00000043467	199							ENSDARG00000063295	105	SNHG12	430
ENSDARG00000000212	253	ENSDARG00000016783	199							ENSDARG00000003017	105	S100A1	430
ENSDARG00000056582	252	ENSDARG00000045874	198							ENSDARG00000074552	105	NDUFAB1	430
ENSDARG00000037259	251	ENSDARG00000035282	198							ENSDARG00000035678	105	NENF	429
ENSDARG00000010878	251	ENSDARG00000015889	198							ENSDARG00000088318	105	NFIC	429
ENSDARG00000018914	251	ENSDARG00000055868	198							ENSDARG00000040072	104	MRPS21	428
ENSDARG00000087640	251	ENSDARG00000057853	197							ENSDARG00000059646	104	MAL	428
ENSDARG00000115644	251	ENSDARG00000096118	197							ENSDARG00000089920	104	MRPL51	428
ENSDARG00000059908	250	ENSDARG00000045167	197							ENSDARG00000037108	104	TNFRSF12A	428
ENSDARG00000035282	250	ENSDARG00000077405	197							ENSDARG00000087456	104	ANAPC11	427
ENSDARG00000029252	250	ENSDARG00000091831	196							ENSDARG00000058371	104	ZNF24	427
ENSDARG00000104068	250	ENSDARG00000035751	196							ENSDARG00000038754	103	HNRNPR	426
ENSDARG00000042876	250	ENSDARG00000011407	196							ENSDARG00000037998	103	TMEM14C	426
ENSDARG00000040245	249	ENSDARG00000037284	196							ENSDARG00000019383	103	PSMA1	426
ENSDARG00000029248	249	ENSDARG00000025147	196							ENSDARG00000011459	103	AHSA1	426
ENSDARG00000029003	249	ENSDARG00000024895	196							ENSDARG00000032606	103	HSPA6	425
ENSDARG00000012553	249	ENSDARG00000001241	195							ENSDARG00000003373	103	HADHB	424
ENSDARG00000033364	249	ENSDARG00000057007	195							ENSDARG00000012603	103	RNF7	424
ENSDARG00000010553	249	ENSDARG00000011510	195							ENSDARG00000032997	102	NDFIP1	424
ENSDARG00000103720	249	ENSDARG00000018989	194							ENSDARG00000093945	102	ATP5F1	423
ENSDARG00000040158	249	ENSDARG00000061854	194							ENSDARG00000070721	102	NUDT3	423
ENSDARG00000026829	249	ENSDARG00000102115	194							ENSDARG00000068457	102	PSMB7	423
ENSDARG00000016999	249	ENSDARG00000056438	194							ENSDARG00000056167	102	GABARAPL1	423
ENSDARG00000024844	249	ENSDARG00000099453	193							ENSDARG00000092493	102	ZNF207	422
ENSDARG00000058656	248	ENSDARG00000029252	193							ENSDARG00000077499	102	STUB1	422
ENSDARG00000008097	248	ENSDARG00000010487	193							ENSDARG00000018602	102	NUFIP2	422
ENSDARG00000037392	248	ENSDARG00000100553	193							ENSDARG00000070834	102	NDUFV2	422
ENSDARG00000023532	248	ENSDARG00000031511	193							ENSDARG00000103364	102	GAPDHS	422
ENSDARG00000042469	247	ENSDARG00000037177	192							ENSDARG00000054290	101	PCNP	421
ENSDARG00000003153	247	ENSDARG00000069100	192							ENSDARG00000045978	101	TAF9	421
ENSDARG00000008237	247	ENSDARG00000012274	192							ENSDARG00000014806	101	IFI27L2	421
ENSDARG00000099194	247	ENSDARG00000019572	192							ENSDARG00000057484	101	LUC7L3	421
ENSDARG00000055708	246	ENSDARG00000116743	191							ENSDARG00000042236	101	CCT8	421
ENSDARG00000024651	246	ENSDARG00000008153	191							ENSDARG00000023220	101	CKB	420
ENSDARG00000076526	246	ENSDARG00000015315	191							ENSDARG00000009250	101	NFKBIZ	419
ENSDARG00000024204	246	ENSDARG00000007377	191							ENSDARG00000009753	101	ETS1	419
ENSDARG00000018476	246	ENSDARG00000090462	191							ENSDARG00000017844	101	TXNL1	419
ENSDARG00000098627	245	ENSDARG00000003189	191							ENSDARG00000045296	101	ATRAID	418
ENSDARG00000043865	245	ENSDARG00000060004	190							ENSDARG00000099465	100	FOSL2	417
ENSDARG00000055283	245	ENSDARG00000001873	190							ENSDARG00000009418	100	GOLGA4	417
ENSDARG00000035066	244	ENSDARG00000087693	190							ENSDARG00000038075	100	C10orf10	417
ENSDARG00000093313	244	ENSDARG00000016999	190							ENSDARG00000075132	100	PRKCDBP	417
ENSDARG00000052073	244	ENSDARG00000009001	190									LINC00657	417
ENSDARG00000100020	244	ENSDARG00000012513	190									PGK1	416
ENSDARG00000001873	244	ENSDARG00000027141	189									TBCB	416
ENSDARG00000011407	244	ENSDARG00000055524	189									ITM2C	415
ENSDARG00000011510	244	ENSDARG00000036190	189									ETF1	415
ENSDARG00000052139	243	ENSDARG00000001057	189									PPA1	415
ENSDARG00000021669	243	ENSDARG00000067990	188									CNP	415
ENSDARG00000091831	243	ENSDARG00000098507	188									MAP2K2	415
ENSDARG00000012747	243	ENSDARG00000103101	188									USF2	415
ENSDARG00000102115	243	ENSDARG00000015851	188									BBX	414
ENSDARG00000099439	243	ENSDARG00000022280	188									VAT1	414
ENSDARG00000112959	243	ENSDARG00000061810	188									SNRNP70	414
ENSDARG00000092383	241	ENSDARG00000025326	187									LSM3	413
ENSDARG00000079949	241	ENSDARG00000007791	187									TGFBR2	413
ENSDARG00000070674	240	ENSDARG00000026531	187									GOLGB1	413
ENSDARG00000103101	240	ENSDARG00000009823	187									REEP5	413
ENSDARG00000038768	239	ENSDARG00000016903	187									NUCB1	413
ENSDARG00000071878	239	ENSDARG00000005774	186									CAPZA2	412
ENSDARG00000025972	239	ENSDARG00000006859	186									IMPDH2	411
ENSDARG00000033655	239	ENSDARG00000013966	186									ARL6IP5	411
ENSDARG00000058471	238	ENSDARG00000105341	186									CREBRF	411
ENSDARG00000096849	238	ENSDARG00000091377	186									SAR1A	411
ENSDARG00000074985	238	ENSDARG00000057303	185									PITHD1	410
ENSDARG00000099453	237	ENSDARG00000020008	185									RHOQ	409
ENSDARG00000040666	237	ENSDARG00000015385	185									CSNK2B	409
ENSDARG00000071586	237	ENSDARG00000041607	185									SLC6A8	409
ENSDARG00000104030	237	ENSDARG00000053684	185									ILF2	407
ENSDARG00000098935	237	ENSDARG00000100826	185									MPZ	406
ENSDARG00000017454	236	ENSDARG00000070623	185									NSG1	406
ENSDARG00000057460	236	ENSDARG00000037038	185									NDUFA12	405
ENSDARG00000061854	236	ENSDARG00000059367	185									TRIM28	405
ENSDARG00000012505	236	ENSDARG00000002791	184									C8orf59	404
ENSDARG00000098228	236	ENSDARG00000059816	184									NFIL3	404
ENSDARG00000027141	235	ENSDARG00000078904	184									RNPS1	404
ENSDARG00000046132	235	ENSDARG00000013800	184									MAT2A	403
ENSDARG00000080010	235	ENSDARG00000059177	184									MAP4	403
ENSDARG00000009250	235	ENSDARG00000042458	184									TUBA1C	403
ENSDARG00000035427	234	ENSDARG00000012234	184									FERMT2	403
ENSDARG00000052840	234	ENSDARG00000060697	184									NDUFS7	403
ENSDARG00000069850	234	ENSDARG00000086411	184									MYLIP	402
ENSDARG00000058504	234	ENSDARG00000026801	184									PSMA2	402
ENSDARG00000053684	234	ENSDARG00000014222	183									STOM	402
ENSDARG00000057691	234	ENSDARG00000025397	182									FCGRT	402
ENSDARG00000010487	234	ENSDARG00000010710	182									PAG1	401
ENSDARG00000070475	234	ENSDARG00000039576	182									EPC1	401
ENSDARG00000019137	234	ENSDARG00000025972	182									STK24	401
ENSDARG00000018618	233	ENSDARG00000040443	182									PSMB3	401
ENSDARG00000028523	233	ENSDARG00000056583	182									RPN2	400
ENSDARG00000097753	233	ENSDARG00000060036	181									TEX41	399
ENSDARG00000095451	233	ENSDARG00000018562	181									HIGD2A	399
ENSDARG00000021984	233	ENSDARG00000037980	181									SERINC1	399
ENSDARG00000002659	233	ENSDARG00000071196	181									A2M	399
ENSDARG00000044267	232	ENSDARG00000008494	181									UBALD2	399
ENSDARG00000103337	232	ENSDARG00000058593	181									WASF2	398
ENSDARG00000043304	232	ENSDARG00000055133	181									PSMB4	398
ENSDARG00000036190	232	ENSDARG00000019530	181									RAB1A	398
ENSDARG00000060697	231	ENSDARG00000022456	181									PRELID1	398
ENSDARG00000089836	231	ENSDARG00000003531	180									WBP2	398
ENSDARG00000018562	230	ENSDARG00000007989	180									MKNK2	398
ENSDARG00000012432	230	ENSDARG00000061052	180									KDELR1	398
ENSDARG00000077256	230	ENSDARG00000015239	180									DNAJC8	397
ENSDARG00000006219	230	ENSDARG00000021753	180									EIF2S3	397
ENSDARG00000104031	230	ENSDARG00000014898	180									DRAP1	397
ENSDARG00000043960	230	ENSDARG00000053810	179									WARS	397
ENSDARG00000044540	230	ENSDARG00000014498	179									PRDX2	397
ENSDARG00000037361	229	ENSDARG00000076659	179									MRPS6	397
ENSDARG00000057007	229	ENSDARG00000056582	179									AURKAIP1	396
ENSDARG00000039424	228	ENSDARG00000104279	178									SYNGR1	396
ENSDARG00000015851	228	ENSDARG00000080010	178									KRTCAP2	395
ENSDARG00000036876	228	ENSDARG00000058538	178									SUGT1	395
ENSDARG00000059070	228	ENSDARG00000070607	178									GAS7	395
ENSDARG00000058369	227	ENSDARG00000089836	178									ANAPC16	394
ENSDARG00000005560	227	ENSDARG00000044540	178									CYBA	394
ENSDARG00000090228	227	ENSDARG00000063177	178									MAFB	394
ENSDARG00000006497	227	ENSDARG00000015422	177									CBR1	394
ENSDARG00000038695	226	ENSDARG00000079848	177									SF3B2	393
ENSDARG00000096118	226	ENSDARG00000043665	177									METRNL	393
ENSDARG00000019335	225	ENSDARG00000098935	177									HNRNPAB	392
ENSDARG00000045874	225	ENSDARG00000038868	176									OSTM1	392
ENSDARG00000093058	225	ENSDARG00000020187	176									RAB2A	392
ENSDARG00000013016	225	ENSDARG00000002271	176									DCTN3	391
ENSDARG00000037640	225	ENSDARG00000095451	176									ABCB5	390
ENSDARG00000042660	225	ENSDARG00000018891	175									TECR	390
ENSDARG00000029406	224	ENSDARG00000035858	175									HPS5	389
ENSDARG00000013800	224	ENSDARG00000097797	175									TUFM	389
ENSDARG00000057676	224	ENSDARG00000046022	175									ECH1	389
ENSDARG00000035559	223	ENSDARG00000103337	175									ARID4B	388
ENSDARG00000007791	223	ENSDARG00000100742	175									PPP2CB	388
ENSDARG00000006837	223	ENSDARG00000057676	175									EPS8	388
ENSDARG00000037284	223	ENSDARG00000037998	175									REL	387
ENSDARG00000037919	222	ENSDARG00000023062	175									GPBP1	387
ENSDARG00000039543	222	ENSDARG00000069116	174									PLA2G16	387
ENSDARG00000062590	222	ENSDARG00000102808	174									PAIP2	386
ENSDARG00000087093	221	ENSDARG00000101043	174									ALKBH7	386
ENSDARG00000103554	221	ENSDARG00000006766	174									SMDT1	386
ENSDARG00000030537	220	ENSDARG00000088984	174									CDV3	385
ENSDARG00000033450	219	ENSDARG00000006497	174									YME1L1	385
ENSDARG00000015206	219	ENSDARG00000017397	174									SIGIRR	385
ENSDARG00000016903	219	ENSDARG00000005945	174									RAB38	385
ENSDARG00000039346	218	ENSDARG00000037259	173									7SK	385
ENSDARG00000046022	218	ENSDARG00000019924	173									ICAM1	385
ENSDARG00000093503	218	ENSDARG00000058225	173									AZGP1	384
ENSDARG00000012078	218	ENSDARG00000014244	173									ERP29	384
ENSDARG00000013075	218	ENSDARG00000103740	173									FAM96B	384
ENSDARG00000041400	218	ENSDARG00000058734	172									LRRFIP1	383
ENSDARG00000100553	218	ENSDARG00000035066	172									ARPC5	383
ENSDARG00000055524	218	ENSDARG00000018698	172									SNRPF	383
ENSDARG00000005945	218	ENSDARG00000056722	172									DEGS1	382
ENSDARG00000013655	218	ENSDARG00000043716	172									CD151	382
ENSDARG00000069013	217	ENSDARG00000088178	172									VPS29	382
ENSDARG00000104530	217	ENSDARG00000013075	172									LEPROT	381
ENSDARG00000010710	217	ENSDARG00000045351	172									RAB13	381
ENSDARG00000042520	216	ENSDARG00000021973	171									CD164	381
ENSDARG00000014366	215	ENSDARG00000032405	171									COPS6	381
ENSDARG00000088823	215	ENSDARG00000029003	171									MDK	381
ENSDARG00000096257	213	ENSDARG00000042725	171									BANF1	381
ENSDARG00000001241	213	ENSDARG00000059398	171									CCDC59	381
ENSDARG00000013333	213	ENSDARG00000004785	171									KPNB1	381
ENSDARG00000016725	213	ENSDARG00000027749	170									ZNF503	380
ENSDARG00000012399	213	ENSDARG00000013333	170									PSMB5	380
ENSDARG00000027749	212	ENSDARG00000024047	170									RAD23A	380
ENSDARG00000056414	212	ENSDARG00000032102	170									TPM4	380
ENSDARG00000043128	212	ENSDARG00000010553	170									CACYBP	379
ENSDARG00000017397	212	ENSDARG00000041332	170									PTGDS	379
ENSDARG00000061810	211	ENSDARG00000034670	170									GADD45GIP1	379
ENSDARG00000092954	210	ENSDARG00000034753	170									PHLDA3	378
ENSDARG00000015422	209	ENSDARG00000024416	170									CEBPZ	378
ENSDARG00000014230	209	ENSDARG00000043485	170									CRTAP	378
ENSDARG00000034753	209	ENSDARG00000054172	170									HMGB2	378
ENSDARG00000079391	208	ENSDARG00000038695	169									FKBP5	378
ENSDARG00000035129	208	ENSDARG00000098627	169									TAX1BP1	378
ENSDARG00000075768	207	ENSDARG00000022303	168									TMEM87A	378
ENSDARG00000104279	206	ENSDARG00000038785	168									ETFB	378
ENSDARG00000030241	205	ENSDARG00000037919	168									GTF2A2	377
ENSDARG00000020527	205	ENSDARG00000052728	168									KCNJ13	377
ENSDARG00000060489	205	ENSDARG00000004692	168									SNRPE	376
ENSDARG00000020448	205	ENSDARG00000006219	168									DDX18	376
ENSDARG00000054172	205	ENSDARG00000004939	168									FGFR1OP2	376
ENSDARG00000074030	205	ENSDARG00000098228	168									POLR1D	376
ENSDARG00000052695	204	ENSDARG00000093406	168									AKAP13	376
ENSDARG00000026531	204	ENSDARG00000019137	168									CSRNP1	375
ENSDARG00000070844	204	ENSDARG00000033597	168									NDUFA2	375
ENSDARG00000019000	204	ENSDARG00000089769	167									SAMD4B	375
ENSDARG00000037410	203	ENSDARG00000052695	167									NDUFA6	375
ENSDARG00000055900	203	ENSDARG00000043865	167									PHGDH	374
ENSDARG00000091996	203	ENSDARG00000056621	167									MET	374
ENSDARG00000070155	203	ENSDARG00000038608	166									CTSB	374
ENSDARG00000060199	203	ENSDARG00000015310	166									GEM	374
ENSDARG00000090309	203	ENSDARG00000007141	166									TMED9	373
ENSDARG00000034195	203	ENSDARG00000104530	166									CHD2	373
ENSDARG00000043485	203	ENSDARG00000028523	166									DYNC1I2	372
ENSDARG00000116743	202	ENSDARG00000040564	166									CLTB	372
ENSDARG00000005774	202	ENSDARG00000005023	166									PRPF4B	372
ENSDARG00000005772	202	ENSDARG00000037846	166									BAG3	371
ENSDARG00000093484	202	ENSDARG00000052649	165									SIVA1	371
ENSDARG00000023672	202	ENSDARG00000101009	165									COPRS	371
ENSDARG00000057167	202	ENSDARG00000100209	165									GNB1	370
ENSDARG00000012458	201	ENSDARG00000012399	165									FLOT1	370
ENSDARG00000102808	201	ENSDARG00000026183	165									BRD4	369
ENSDARG00000016691	201	ENSDARG00000056414	164									IVNS1ABP	368
ENSDARG00000017762	201	ENSDARG00000008188	164									OCIAD1	368
ENSDARG00000025397	201	ENSDARG00000040666	164									MYOT	368
ENSDARG00000071224	201	ENSDARG00000105231	164									OPTN	368
ENSDARG00000099283	201	ENSDARG00000073978	164									PGAM1	368
ENSDARG00000038505	201	ENSDARG00000035559	163									PRMT1	368
ENSDARG00000099635	200	ENSDARG00000007720	163									YWHAH	368
ENSDARG00000054321	200	ENSDARG00000022315	163									BCL6	367
ENSDARG00000030155	200	ENSDARG00000042520	163									TSPYL2	367
ENSDARG00000042927	200	ENSDARG00000007526	163									NDUFA3	367
ENSDARG00000060065	200	ENSDARG00000069920	163									BEX4	366
ENSDARG00000055455	200	ENSDARG00000069624	163									DLC1	366
ENSDARG00000045351	200	ENSDARG00000103404	163									PSMC3	366
ENSDARG00000052907	199	ENSDARG00000062338	162									CNPY2	366
ENSDARG00000054063	199	ENSDARG00000104030	162									MYCBP2	366
ENSDARG00000009505	199	ENSDARG00000008020	162									UBE2M	366
ENSDARG00000091148	199	ENSDARG00000074985	162									MARCH6	365
ENSDARG00000071566	199	ENSDARG00000052907	161									COX14	365
ENSDARG00000036329	199	ENSDARG00000002591	161									UBE2E3	364
ENSDARG00000041332	199	ENSDARG00000056160	161									SUMO1	364
ENSDARG00000060679	199	ENSDARG00000098671	161									SDF2L1	364
ENSDARG00000009001	199	ENSDARG00000060199	161									H2AFV	363
ENSDARG00000019530	199	ENSDARG00000003938	161									OS9	363
ENSDARG00000002791	198	ENSDARG00000041363	161									TMEM147	363
ENSDARG00000038608	198	ENSDARG00000021787	161									ASPH	362
ENSDARG00000062338	198	ENSDARG00000006527	161									M6PR	362
ENSDARG00000103824	198	ENSDARG00000009553	161									STRAP	362
ENSDARG00000087555	198	ENSDARG00000099635	160									MRPL52	362
ENSDARG00000005827	198	ENSDARG00000079688	160									DHRS7	362
ENSDARG00000026801	198	ENSDARG00000013016	160									PKIG	362
ENSDARG00000008333	197	ENSDARG00000056379	160									CHMP3	361
ENSDARG00000022303	197	ENSDARG00000021984	160									SVIP	361
ENSDARG00000032175	197	ENSDARG00000040864	160									PCF11	361
ENSDARG00000057867	197	ENSDARG00000021945	160									BLOC1S1	361
ENSDARG00000104018	197	ENSDARG00000104071	159									POLR2I	361
ENSDARG00000039185	197	ENSDARG00000039424	159									EWSR1	361
ENSDARG00000044332	197	ENSDARG00000027590	159									POLR2K	360
ENSDARG00000038643	197	ENSDARG00000104173	159									PSMC6	360
ENSDARG00000037503	197	ENSDARG00000024561	159									TMBIM1	359
ENSDARG00000012513	197	ENSDARG00000053668	159									GNL3	359
ENSDARG00000042874	197	ENSDARG00000012505	159									SORBS2	359
ENSDARG00000045898	196	ENSDARG00000005827	159									MRP63	359
ENSDARG00000003165	196	ENSDARG00000039185	158									WIPI1	359
ENSDARG00000014222	196	ENSDARG00000052073	158									OSER1	359
ENSDARG00000009534	195	ENSDARG00000058467	158									PEA15	358
ENSDARG00000008383	195	ENSDARG00000039041	158									OTUD7B	357
ENSDARG00000088178	195	ENSDARG00000004706	158									GTF2H5	357
ENSDARG00000024561	195	ENSDARG00000071679	158									RTF1	357
ENSDARG00000022315	194	ENSDARG00000054271	158									SLC39A6	357
ENSDARG00000008188	194	ENSDARG00000055945	157									RPS19BP1	357
ENSDARG00000056138	194	ENSDARG00000044267	157									TYR	356
ENSDARG00000006859	194	ENSDARG00000039162	157									UQCRFS1	356
ENSDARG00000069624	193	ENSDARG00000003749	157									BCAS2	355
ENSDARG00000018524	193	ENSDARG00000102744	157									MTPN	355
ENSDARG00000104071	192	ENSDARG00000061490	156									FUNDC2	355
ENSDARG00000096667	192	ENSDARG00000055360	156									RAB5C	355
ENSDARG00000012944	192	ENSDARG00000070828	156									THRAP3	354
ENSDARG00000052728	192	ENSDARG00000069853	156									BAG1	354
ENSDARG00000035809	192	ENSDARG00000075593	156									FKBP1A	354
ENSDARG00000074745	192	ENSDARG00000044001	156									RRAS	354
ENSDARG00000100209	192	ENSDARG00000103554	156									PLK3	353
ENSDARG00000101619	192	ENSDARG00000074030	156									BHLHE40	353
ENSDARG00000100990	191	ENSDARG00000003641	155									TERF2IP	353
ENSDARG00000013144	191	ENSDARG00000036329	155									ADI1	352
ENSDARG00000056621	191	ENSDARG00000019949	155									EIF3J	352
ENSDARG00000014898	191	ENSDARG00000061100	155									NRP2	351
ENSDARG00000024109	190	ENSDARG00000059908	154									HEXB	351
ENSDARG00000015239	190	ENSDARG00000004034	154									CXCL2	350
ENSDARG00000011564	190	ENSDARG00000039346	154									PDCD6	350
ENSDARG00000021753	190	ENSDARG00000019000	154									WAC	350
ENSDARG00000053370	189	ENSDARG00000018461	154									MLF2	350
ENSDARG00000007141	189	ENSDARG00000059070	154									FAM129A	349
ENSDARG00000045142	189	ENSDARG00000068305	153									CTTN	349
ENSDARG00000019572	189	ENSDARG00000008383	153									DCXR	349
ENSDARG00000005536	189	ENSDARG00000033466	153									SH3BGRL3	348
ENSDARG00000042484	189	ENSDARG00000001210	153									SRPX	348
ENSDARG00000068305	188	ENSDARG00000041450	153									ATP2A2	348
ENSDARG00000020101	188	ENSDARG00000099283	153									AHCYL1	347
ENSDARG00000058479	188	ENSDARG00000010238	153									ARPP19	347
ENSDARG00000051886	188	ENSDARG00000009484	152									SNRPD3	347
ENSDARG00000056160	188	ENSDARG00000024141	152									TNRC6B	347
ENSDARG00000004706	188	ENSDARG00000018328	152									YY1	346
ENSDARG00000040564	188	ENSDARG00000087555	152									SCP2	346
ENSDARG00000070426	188	ENSDARG00000089787	151									ZC3H15	346
ENSDARG00000008020	188	ENSDARG00000042492	151									ERBB2IP	346
ENSDARG00000056722	187	ENSDARG00000008447	151									TMEM219	346
ENSDARG00000032630	187	ENSDARG00000087647	151									TTC3	346
ENSDARG00000028327	187	ENSDARG00000096359	151									TNFRSF14	345
ENSDARG00000052348	186	ENSDARG00000046106	151									ZNF330	345
ENSDARG00000009484	186	ENSDARG00000012458	150									CCT5	345
ENSDARG00000027590	186	ENSDARG00000092954	150									STIP1	345
ENSDARG00000002591	186	ENSDARG00000017454	150									SARS	344
ENSDARG00000007989	186	ENSDARG00000016733	150									CCT6A	344
ENSDARG00000043857	186	ENSDARG00000044332	150									YTHDC1	343
ENSDARG00000056649	186	ENSDARG00000031293	150									MRPL41	343
ENSDARG00000063145	186	ENSDARG00000030537	150									HMG20B	342
ENSDARG00000004782	186	ENSDARG00000007823	150									TLN1	342
ENSDARG00000033597	186	ENSDARG00000012593	150									DNAJC3	342
ENSDARG00000059816	185	ENSDARG00000101733	150									ACADVL	342
ENSDARG00000022213	185	ENSDARG00000002952	149									RAB34	342
ENSDARG00000113969	185	ENSDARG00000100095	149									GGNBP2	342
ENSDARG00000008153	185	ENSDARG00000009505	149									C19orf70	342
ENSDARG00000018328	185	ENSDARG00000097753	149									PEPD	342
ENSDARG00000058225	185	ENSDARG00000023472	149									PSMC1	341
ENSDARG00000100826	185	ENSDARG00000102879	149									ARHGAP5	340
ENSDARG00000036107	185	ENSDARG00000014794	148									ING1	339
ENSDARG00000101127	185	ENSDARG00000055455	148									PRMT2	339
ENSDARG00000104173	184	ENSDARG00000041400	148									NDUFB5	338
ENSDARG00000008551	184	ENSDARG00000042660	148									SLC7A5	338
ENSDARG00000075622	184	ENSDARG00000101127	148									TSPYL1	337
ENSDARG00000076799	184	ENSDARG00000099640	147									VIMP	337
ENSDARG00000116713	184	ENSDARG00000020101	147									TOB2	337
ENSDARG00000054271	184	ENSDARG00000052840	147									TMEM256	336
ENSDARG00000074266	183	ENSDARG00000010873	147									ATP1B1	335
ENSDARG00000076847	183	ENSDARG00000056138	147									PFKFB3	335
ENSDARG00000058467	183	ENSDARG00000019362	146									PNN	335
ENSDARG00000104682	183	ENSDARG00000069850	146									KANK2	335
ENSDARG00000053810	182	ENSDARG00000023279	146									CLDND1	334
ENSDARG00000021973	182	ENSDARG00000112959	146									FAM162A	334
ENSDARG00000018698	182	ENSDARG00000087093	145									SSR3	334
ENSDARG00000100372	182	ENSDARG00000077121	145									PPIL4	334
ENSDARG00000051957	182	ENSDARG00000052746	145									KDELR2	334
ENSDARG00000111939	182	ENSDARG00000062948	145									DKK3	334
ENSDARG00000006524	182	ENSDARG00000100990	144									UBXN4	333
ENSDARG00000079688	181	ENSDARG00000004232	144									EMC4	333
ENSDARG00000093945	181	ENSDARG00000097445	144									NARG2	333
ENSDARG00000041051	181	ENSDARG00000020252	144									RALBP1	333
ENSDARG00000105231	181	ENSDARG00000030155	144									CFDP1	332
ENSDARG00000075593	181	ENSDARG00000041530	144									HADHA	331
ENSDARG00000076659	181	ENSDARG00000092136	144									FAM3C	331
ENSDARG00000003941	181	ENSDARG00000104708	144									CYC1	331
ENSDARG00000031164	180	ENSDARG00000043137	144									UQCRC2	331
ENSDARG00000061490	180	ENSDARG00000044402	144									RTFDC1	331
ENSDARG00000055360	180	ENSDARG00000115644	144									OSBPL9	330
ENSDARG00000070828	180	ENSDARG00000100741	143									UXT	330
ENSDARG00000039345	180	ENSDARG00000008867	143									PSMC5	329
ENSDARG00000095796	180	ENSDARG00000074979	143									FBL	329
ENSDARG00000039980	180	ENSDARG00000003564	143									PRPF38B	328
ENSDARG00000101900	180	ENSDARG00000098783	143									PRKD3	328
ENSDARG00000011594	180	ENSDARG00000078164	143									FYN	328
ENSDARG00000094833	179	ENSDARG00000013655	143									ATRX	328
ENSDARG00000002271	179	ENSDARG00000101631	143									RB1CC1	328
ENSDARG00000022280	179	ENSDARG00000045877	142									KHDRBS3	328
ENSDARG00000046106	179	ENSDARG00000021193	142									PNPLA2	328
ENSDARG00000103740	179	ENSDARG00000103845	142									C19orf10	328
ENSDARG00000059367	179	ENSDARG00000055969	142									AP2S1	328
ENSDARG00000101624	179	ENSDARG00000099744	142									TPR	327
ENSDARG00000013044	178	ENSDARG00000104031	142									MRPS36	327
ENSDARG00000003564	178	ENSDARG00000100363	142									NPTX2	327
ENSDARG00000008678	178	ENSDARG00000101900	142									TMEM230	327
ENSDARG00000024895	178	ENSDARG00000077870	142									MAPRE1	327
ENSDARG00000077536	177	ENSDARG00000016153	142									PDCD5	327
ENSDARG00000069853	177	ENSDARG00000013379	142									FBXO7	327
ENSDARG00000104708	177	ENSDARG00000029263	141									RAB10	326
ENSDARG00000009544	177	ENSDARG00000098391	141									CPEB4	326
ENSDARG00000115281	177	ENSDARG00000052536	141									ENPP2	326
ENSDARG00000059177	176	ENSDARG00000060065	141									AFF4	325
ENSDARG00000041363	176	ENSDARG00000005699	141									CPQ	325
ENSDARG00000054150	176	ENSDARG00000060489	141									NNMT	325
ENSDARG00000071679	176	ENSDARG00000054272	141									2009-09-01	325
ENSDARG00000014794	175	ENSDARG00000101619	141									ARID5A	324
ENSDARG00000006124	175	ENSDARG00000003216	141									EPB41L2	324
ENSDARG00000045167	175	ENSDARG00000040245	140									SEMA3C	324
ENSDARG00000021550	175	ENSDARG00000093058	140									IFI6	323
ENSDARG00000040864	175	ENSDARG00000003165	140									TUBB2B	323
ENSDARG00000074335	175	ENSDARG00000043960	140									GPR143	323
ENSDARG00000034777	174	ENSDARG00000034777	139									DAZAP2	323
ENSDARG00000004232	174	ENSDARG00000059680	139									MYO5A	323
ENSDARG00000052536	174	ENSDARG00000035129	139									SUMO3	323
ENSDARG00000077121	174	ENSDARG00000088717	139									MT-ATP8	323
ENSDARG00000079823	174	ENSDARG00000005772	139									LMAN2	322
ENSDARG00000076439	174	ENSDARG00000004782	139									NOP10	322
ENSDARG00000090912	174	ENSDARG00000033450	139									DNAJC7	322
ENSDARG00000008447	174	ENSDARG00000044102	139									ACTR3	320
ENSDARG00000087647	174	ENSDARG00000014230	139									PPP2CA	320
ENSDARG00000069521	174	ENSDARG00000032606	139									BCAP31	320
ENSDARG00000003531	173	ENSDARG00000001721	138									NFIA	319
ENSDARG00000071426	173	ENSDARG00000098221	138									HDLBP	319
ENSDARG00000031981	173	ENSDARG00000019098	138									NXF1	319
ENSDARG00000005023	173	ENSDARG00000039601	138									ESF1	319
ENSDARG00000024746	173	ENSDARG00000015394	138									ACP5	319
ENSDARG00000013379	173	ENSDARG00000057167	138									GLO1	318
ENSDARG00000099281	172	ENSDARG00000018574	138									MAP4K5	318
ENSDARG00000018902	172	ENSDARG00000077664	138									BIRC7	318
ENSDARG00000020187	172	ENSDARG00000016725	138									EFNA1	317
ENSDARG00000003641	172	ENSDARG00000076799	138									ADH5	317
ENSDARG00000023279	172	ENSDARG00000026476	137									CXXC5	317
ENSDARG00000019362	171	ENSDARG00000044820	137									AHI1	317
ENSDARG00000038785	171	ENSDARG00000071566	137									BHLHE41	317
ENSDARG00000015392	171	ENSDARG00000071336	137									ANKRD11	317
ENSDARG00000041306	171	ENSDARG00000091001	137									ERF	317
ENSDARG00000034423	171	ENSDARG00000022564	137									FAM177A1	316
ENSDARG00000090788	171	ENSDARG00000018319	136									COQ10B	315
ENSDARG00000069142	171	ENSDARG00000008886	136									FNIP2	315
ENSDARG00000061100	171	ENSDARG00000022213	136									PURA	315
ENSDARG00000059075	170	ENSDARG00000113969	136									ZNHIT1	315
ENSDARG00000102879	170	ENSDARG00000039005	136									RASSF4	315
ENSDARG00000061052	169	ENSDARG00000075560	135									BCL2	315
ENSDARG00000003035	169	ENSDARG00000013144	135									HES4	314
ENSDARG00000058593	169	ENSDARG00000013822	135									NDUFS4	314
ENSDARG00000040443	169	ENSDARG00000034344	135									CCND1	314
ENSDARG00000101631	169	ENSDARG00000059075	135									WBP11	314
ENSDARG00000114516	168	ENSDARG00000034195	135									2004-09-01	314
ENSDARG00000100741	168	ENSDARG00000042484	135									SRP72	313
ENSDARG00000054362	168	ENSDARG00000045367	135									PRDX4	313
ENSDARG00000039162	168	ENSDARG00000003941	135									PTPLA	313
ENSDARG00000001210	168	ENSDARG00000037178	134									FKBP4	313
ENSDARG00000035699	168	ENSDARG00000039142	134									PPP1CC	313
ENSDARG00000039493	168	ENSDARG00000057414	134									SNW1	313
ENSDARG00000104938	168	ENSDARG00000045513	134									2015-09-01	312
ENSDARG00000045913	167	ENSDARG00000094833	134									CHD4	312
ENSDARG00000015947	167	ENSDARG00000011611	134									SDHB	311
ENSDARG00000039601	167	ENSDARG00000009250	134									SELT	311
ENSDARG00000045144	167	ENSDARG00000068404	134									VPS26A	311
ENSDARG00000041607	167	ENSDARG00000101626	134									TMEM109	311
ENSDARG00000041450	167	ENSDARG00000037539	134									SETD5-AS1	310
ENSDARG00000002952	166	ENSDARG00000036855	134									LZTS1	310
ENSDARG00000007720	166	ENSDARG00000008237	134									APRT	310
ENSDARG00000006514	166	ENSDARG00000006642	133									PET100	310
ENSDARG00000058044	166	ENSDARG00000030241	133									RBM23	309
ENSDARG00000007526	166	ENSDARG00000093484	133									METRN	309
ENSDARG00000034616	166	ENSDARG00000039345	133									ATP5G1	309
ENSDARG00000054911	166	ENSDARG00000076439	133									NGFR	309
ENSDARG00000017744	165	ENSDARG00000068629	133									PRELP	308
ENSDARG00000057303	165	ENSDARG00000030716	133									C10orf32	308
ENSDARG00000100095	164	ENSDARG00000077815	132									SCAF11	308
ENSDARG00000020252	164	ENSDARG00000101161	132									PQLC1	308
ENSDARG00000004692	164	ENSDARG00000014806	132									PTPRS	308
ENSDARG00000089787	164	ENSDARG00000071658	132									ENSA	307
ENSDARG00000068886	164	ENSDARG00000030038	132									CAV2	307
ENSDARG00000056903	164	ENSDARG00000021550	132									RAB21	307
ENSDARG00000004939	164	ENSDARG00000036894	132									CYGB	307
ENSDARG00000096829	164	ENSDARG00000008785	132									PTBP1	307
ENSDARG00000028971	164	ENSDARG00000052348	131									MYLK	306
ENSDARG00000058297	164	ENSDARG00000007315	131									CALU	306
ENSDARG00000006766	163	ENSDARG00000051886	131									NONO	306
ENSDARG00000044125	163	ENSDARG00000006074	131									VASN	306
ENSDARG00000044102	163	ENSDARG00000010962	131									RYBP	305
ENSDARG00000009553	163	ENSDARG00000104458	131									MRPS18C	305
ENSDARG00000016153	163	ENSDARG00000099184	131									CHMP5	305
ENSDARG00000071196	162	ENSDARG00000103732	131									CSNK1E	305
ENSDARG00000031293	162	ENSDARG00000073944	131									RABGGTB	304
ENSDARG00000013968	162	ENSDARG00000019060	131									COX20	304
ENSDARG00000099918	162	ENSDARG00000075768	131									SNX2	304
ENSDARG00000062948	162	ENSDARG00000055903	131									TCEA1	304
ENSDARG00000015310	161	ENSDARG00000054793	130									SLC35D2	304
ENSDARG00000078383	161	ENSDARG00000076847	130									RTN3	304
ENSDARG00000016733	161	ENSDARG00000078383	130									ADIPOR2	304
ENSDARG00000100742	161	ENSDARG00000042927	130									RANBP1	303
ENSDARG00000103787	161	ENSDARG00000042533	130									H1F0	303
ENSDARG00000016783	161	ENSDARG00000086416	130									PGRMC2	302
ENSDARG00000054154	161	ENSDARG00000063145	130									TIMM8B	302
ENSDARG00000090386	161	ENSDARG00000071396	130									RRAD	302
ENSDARG00000009823	161	ENSDARG00000079150	130									HN1	302
ENSDARG00000024416	161	ENSDARG00000018693	130									ILF3	302
ENSDARG00000006527	161	ENSDARG00000104178	129									NDUFB3	301
ENSDARG00000075161	161	ENSDARG00000073710	129									UBE2N	301
ENSDARG00000103404	161	ENSDARG00000079823	129									PDE4DIP	300
ENSDARG00000003749	160	ENSDARG00000036558	129									TMCO1	300
ENSDARG00000092787	160	ENSDARG00000016649	129									BCLAF1	300
ENSDARG00000063177	160	ENSDARG00000003035	129									PDAP1	300
ENSDARG00000104178	159	ENSDARG00000095796	129									CCDC71L	300
ENSDARG00000069100	159	ENSDARG00000040076	129									IGBP1	300
ENSDARG00000105018	159	ENSDARG00000104451	129									SDHD	300
ENSDARG00000003213	159	ENSDARG00000017740	129									NFATC1	300
ENSDARG00000014498	159	ENSDARG00000104018	128									FXYD3	300
ENSDARG00000022564	159	ENSDARG00000093945	128									OSTC	299
ENSDARG00000023472	159	ENSDARG00000069432	128									GRASP	299
ENSDARG00000011921	159	ENSDARG00000038882	128									NCOR1	299
ENSDARG00000008735	159	ENSDARG00000056903	128									CWC15	298
ENSDARG00000021945	159	ENSDARG00000104938	128									HEXA	298
ENSDARG00000103472	158	ENSDARG00000033855	128									LSM7	298
ENSDARG00000026712	158	ENSDARG00000057114	127									UBE2L3	298
ENSDARG00000042533	158	ENSDARG00000017744	127									THOC7	297
ENSDARG00000055536	158	ENSDARG00000010381	127									L1CAM	297
ENSDARG00000010238	158	ENSDARG00000079605	127									IL11RA	297
ENSDARG00000019702	158	ENSDARG00000088711	127									DNAJA4	297
ENSDARG00000052649	157	ENSDARG00000045913	127									YTHDF2	296
ENSDARG00000045513	157	ENSDARG00000035596	127									UGDH	296
ENSDARG00000041887	157	ENSDARG00000031261	127									RAB32	296
ENSDARG00000071396	157	ENSDARG00000093503	127									GSTK1	296
ENSDARG00000090337	157	ENSDARG00000002552	127									SPTAN1	296
ENSDARG00000093406	157	ENSDARG00000020311	127									CHD9	296
ENSDARG00000018693	157	ENSDARG00000053485	127									DYNC1LI2	296
ENSDARG00000098852	156	ENSDARG00000026766	127									ILVBL	296
ENSDARG00000074667	156	ENSDARG00000021143	127									MYC	295
ENSDARG00000094210	156	ENSDARG00000013729	127									FAM213A	295
ENSDARG00000090389	156	ENSDARG00000016706	126									GRN	295
ENSDARG00000005128	156	ENSDARG00000013044	126									MIA	295
ENSDARG00000014806	156	ENSDARG00000002949	126									EIF2A	294
ENSDARG00000007294	156	ENSDARG00000063572	126									NARF	293
ENSDARG00000114870	156	ENSDARG00000098466	126									CDC42EP3	292
ENSDARG00000030139	156	ENSDARG00000010721	126									GCC2	292
ENSDARG00000043257	156	ENSDARG00000058729	126									SLC25A36	292
ENSDARG00000088619	156	ENSDARG00000011594	126									C7orf50	292
ENSDARG00000012593	156	ENSDARG00000029072	126									PRSS23	292
ENSDARG00000058560	156	ENSDARG00000100223	125									BCAN	291
ENSDARG00000055903	156	ENSDARG00000093622	125									SCCPDH	291
ENSDARG00000075560	155	ENSDARG00000094210	125									C19orf60	291
ENSDARG00000009346	155	ENSDARG00000111939	125									CERS2	290
ENSDARG00000043663	155	ENSDARG00000026842	125									SOX2	290
ENSDARG00000055969	155	ENSDARG00000090386	125									RRAGA	290
ENSDARG00000021787	155	ENSDARG00000075542	125									IQGAP1	290
ENSDARG00000041878	155	ENSDARG00000018241	124									USP16	290
ENSDARG00000053129	154	ENSDARG00000043502	124									EVA1B	289
ENSDARG00000100374	154	ENSDARG00000015088	124									EHBP1	289
ENSDARG00000069461	154	ENSDARG00000071691	124									PPM1K	289
ENSDARG00000019098	154	ENSDARG00000052842	124									COL1A2	289
ENSDARG00000015394	154	ENSDARG00000090788	124									RBBP7	289
ENSDARG00000016280	154	ENSDARG00000032103	124									NDUFV1	289
ENSDARG00000098671	154	ENSDARG00000042319	124									GLRX5	289
ENSDARG00000037998	154	ENSDARG00000004161	124									EMC7	289
ENSDARG00000052928	154	ENSDARG00000043713	123									TMEM98	289
ENSDARG00000100363	154	ENSDARG00000069056	123									ZBTB7A	289
ENSDARG00000073944	154	ENSDARG00000056481	123									AK2	288
ENSDARG00000019810	154	ENSDARG00000041723	123									PPP4R2	288
ENSDARG00000102995	154	ENSDARG00000024109	123									PHIP	288
ENSDARG00000061794	154	ENSDARG00000021483	123									ANK3	288
ENSDARG00000104587	153	ENSDARG00000041306	123									RP11-349A22.5	288
ENSDARG00000103718	153	ENSDARG00000099236	123									ZNF428	288
ENSDARG00000008982	153	ENSDARG00000014796	123									MPC2	287
ENSDARG00000043154	153	ENSDARG00000005134	123									U2SURP	287
ENSDARG00000024295	153	ENSDARG00000052721	123									EZR	287
ENSDARG00000104267	153	ENSDARG00000089480	123									GTF2I	287
ENSDARG00000023003	153	ENSDARG00000007693	123									RAB14	287
ENSDARG00000079848	153	ENSDARG00000018010	123									ADRM1	287
ENSDARG00000039005	153	ENSDARG00000077840	123									ETS2	287
ENSDARG00000010571	153	ENSDARG00000011921	123									AKR1B1	286
ENSDARG00000008740	152	ENSDARG00000103364	123									DCTN2	286
ENSDARG00000039576	152	ENSDARG00000045372	123									UBE2A	285
ENSDARG00000099184	152	ENSDARG00000099776	122									LAPTM4B	285
ENSDARG00000026766	152	ENSDARG00000075795	122									C1S	285
ENSDARG00000059680	151	ENSDARG00000096257	122									APEX1	285
ENSDARG00000030756	151	ENSDARG00000019496	122									THBS1	285
ENSDARG00000010873	151	ENSDARG00000056783	122									NMT1	285
ENSDARG00000079313	151	ENSDARG00000071426	122									GBP2	284
ENSDARG00000005840	151	ENSDARG00000007347	122									GLS	284
ENSDARG00000015088	151	ENSDARG00000068582	122									MYO10	284
ENSDARG00000068755	151	ENSDARG00000101481	122									STX7	284
ENSDARG00000099101	151	ENSDARG00000002304	122									NR4A3	284
ENSDARG00000021702	150	ENSDARG00000034013	122									ANXA11	284
ENSDARG00000018891	150	ENSDARG00000045773	122									CHMP4B	284
ENSDARG00000054793	150	ENSDARG00000012987	122									PSMD4	283
ENSDARG00000018958	150	ENSDARG00000015790	121									ARRDC3	283
ENSDARG00000102531	150	ENSDARG00000034189	121									SLU7	282
ENSDARG00000019496	150	ENSDARG00000055900	121									POLR2J	282
ENSDARG00000076321	150	ENSDARG00000079391	121									COX16	282
ENSDARG00000043732	150	ENSDARG00000078214	121									KDM6B	282
ENSDARG00000043848	150	ENSDARG00000036386	121									SNRPD1	282
ENSDARG00000098785	150	ENSDARG00000096711	121									ZNF644	281
ENSDARG00000069855	150	ENSDARG00000037675	121									GPR155	281
ENSDARG00000057571	150	ENSDARG00000101624	121									TFG	280
ENSDARG00000037432	150	ENSDARG00000063295	120									TMEM14B	280
ENSDARG00000025326	149	ENSDARG00000003287	120									PCM1	280
ENSDARG00000012387	149	ENSDARG00000052061	120									RAD21	280
ENSDARG00000077815	149	ENSDARG00000035699	120									MAF1	280
ENSDARG00000042492	149	ENSDARG00000006124	120									TM9SF3	280
ENSDARG00000003308	149	ENSDARG00000041051	120									DNAJA2	280
ENSDARG00000059259	149	ENSDARG00000052975	120									MIR22HG	280
ENSDARG00000043137	149	ENSDARG00000019810	120									C1QBP	280
ENSDARG00000002970	148	ENSDARG00000055536	120									AZIN1	279
ENSDARG00000061774	148	ENSDARG00000098589	120									MAGOH	279
ENSDARG00000033466	148	ENSDARG00000110836	120									YPEL5	279
ENSDARG00000105412	148	ENSDARG00000010571	120									HSPA12A	279
ENSDARG00000071336	148	ENSDARG00000059308	120									FARP1	279
ENSDARG00000034670	148	ENSDARG00000051800	120									ERGIC3	279
ENSDARG00000042642	148	ENSDARG00000043644	119									NCKAP1	278
ENSDARG00000026634	148	ENSDARG00000012387	119									IK	278
ENSDARG00000009315	147	ENSDARG00000104114	119									EIF3B	278
ENSDARG00000074246	147	ENSDARG00000040822	119									PPP1R12A	278
ENSDARG00000025858	147	ENSDARG00000104945	119									SDF4	277
ENSDARG00000020311	147	ENSDARG00000069503	119									VGLL4	277
ENSDARG00000098783	147	ENSDARG00000103403	119									RSF1	277
ENSDARG00000030038	147	ENSDARG00000058297	119									TSPAN3	277
ENSDARG00000056099	147	ENSDARG00000103718	118									RER1	276
ENSDARG00000103364	147	ENSDARG00000014015	118									CD82	276
ENSDARG00000044488	147	ENSDARG00000039958	118									EI24	276
ENSDARG00000059308	147	ENSDARG00000006019	118									NSRP1	276
ENSDARG00000070866	146	ENSDARG00000074335	118									PPP2R1A	276
ENSDARG00000061951	146	ENSDARG00000057624	118									CD83	275
ENSDARG00000098221	146	ENSDARG00000005754	117									GMPR	275
ENSDARG00000041723	146	ENSDARG00000089291	117									CTSA	275
ENSDARG00000063572	146	ENSDARG00000037789	117									TOMM22	275
ENSDARG00000040557	146	ENSDARG00000035634	117									SUN2	275
ENSDARG00000054929	146	ENSDARG00000100374	117									AKIRIN1	274
ENSDARG00000036894	146	ENSDARG00000014083	117									CMPK1	274
ENSDARG00000077456	146	ENSDARG00000020893	117									IGSF8	274
ENSDARG00000099640	145	ENSDARG00000068641	117									EPAS1	274
ENSDARG00000010192	145	ENSDARG00000025858	117									HEBP2	274
ENSDARG00000045877	145	ENSDARG00000043732	117									UPP1	274
ENSDARG00000035596	145	ENSDARG00000059304	117									SMS	274
ENSDARG00000011613	145	ENSDARG00000044092	117									TLE4	274
ENSDARG00000068629	145	ENSDARG00000103747	117									RBM17	274
ENSDARG00000030716	145	ENSDARG00000037410	116									AAMDC	274
ENSDARG00000102744	145	ENSDARG00000007241	116									RBM7	274
ENSDARG00000077870	145	ENSDARG00000032175	116									CDK2	274
ENSDARG00000057414	144	ENSDARG00000074246	116									RNF114	274
ENSDARG00000007315	144	ENSDARG00000026655	116									PHACTR4	273
ENSDARG00000036299	144	ENSDARG00000103316	116									NOP58	273
ENSDARG00000068641	144	ENSDARG00000079313	116									HDDC2	273
ENSDARG00000052746	144	ENSDARG00000041887	116									TLE1	273
ENSDARG00000042319	144	ENSDARG00000056059	116									TIMM13	273
ENSDARG00000117089	144	ENSDARG00000039429	116									GNG12	272
ENSDARG00000008785	144	ENSDARG00000016280	116									SLC39A1	272
ENSDARG00000037109	143	ENSDARG00000100515	116									RNF181	271
ENSDARG00000002949	143	ENSDARG00000022995	116									MGAT1	271
ENSDARG00000016830	143	ENSDARG00000087303	116									USP53	270
ENSDARG00000005699	143	ENSDARG00000046030	116									ANXA6	270
ENSDARG00000098972	143	ENSDARG00000104034	116									MRPL32	270
ENSDARG00000007347	143	ENSDARG00000112476	115									BEX2	270
ENSDARG00000061764	143	ENSDARG00000028618	115									NDUFB6	270
ENSDARG00000070108	143	ENSDARG00000070006	115									TSPAN4	270
ENSDARG00000060687	143	ENSDARG00000055080	115									MXRA7	270
ENSDARG00000042045	143	ENSDARG00000069065	115									MAFG	270
ENSDARG00000020015	142	ENSDARG00000068996	115									NEDD4L	270
ENSDARG00000089382	142	ENSDARG00000010792	115									RAB5A	269
ENSDARG00000091124	142	ENSDARG00000105412	115									IGF2BP2	269
ENSDARG00000074979	142	ENSDARG00000030139	115									PPAP2A	269
ENSDARG00000075129	142	ENSDARG00000014676	115									TCEAL8	269
ENSDARG00000036386	142	ENSDARG00000034616	115									NCAM1	269
ENSDARG00000021483	142	ENSDARG00000014569	115									GPR56	269
ENSDARG00000058538	142	ENSDARG00000005536	115									SUPT4H1	269
ENSDARG00000019949	142	ENSDARG00000070426	115									NRIP1	269
ENSDARG00000103553	142	ENSDARG00000039493	115									CAPN2	268
ENSDARG00000023160	142	ENSDARG00000036510	115									PRPF40A	268
ENSDARG00000010717	142	ENSDARG00000055100	115									RPL7L1	268
ENSDARG00000004161	142	ENSDARG00000053496	114									CBX3	268
ENSDARG00000012892	142	ENSDARG00000010192	114									BAMBI	268
ENSDARG00000058354	141	ENSDARG00000043848	114									ATP6V1D	268
ENSDARG00000032129	141	ENSDARG00000056649	114									NPTN	268
ENSDARG00000028688	141	ENSDARG00000015649	114									NR2F2	268
ENSDARG00000052377	141	ENSDARG00000098334	114									FAM211A	268
ENSDARG00000055080	141	ENSDARG00000026180	114									SIPA1L2	267
ENSDARG00000099339	141	ENSDARG00000014685	114									RBPJ	267
ENSDARG00000041530	141	ENSDARG00000058693	114									FAM129B	267
ENSDARG00000035810	141	ENSDARG00000056338	114									SNX6	267
ENSDARG00000005134	141	ENSDARG00000099959	114									FAM63B	267
ENSDARG00000057805	141	ENSDARG00000003607	113									SRSF4	266
ENSDARG00000055991	141	ENSDARG00000028848	113									RAP1A	266
ENSDARG00000027357	140	ENSDARG00000099281	113									ANKRD28	266
ENSDARG00000069817	140	ENSDARG00000008030	113									NDUFAF2	266
ENSDARG00000002552	140	ENSDARG00000009170	113									G3BP1	266
ENSDARG00000103732	140	ENSDARG00000070844	113									C7orf55-LUC7L2	266
ENSDARG00000053668	140	ENSDARG00000100398	113									PSMD11	266
ENSDARG00000091079	140	ENSDARG00000102624	113									MIR24-2	266
ENSDARG00000097959	140	ENSDARG00000075621	113									ATP6V1E1	266
ENSDARG00000070833	140	ENSDARG00000068698	113									SP100	265
ENSDARG00000104889	140	ENSDARG00000033172	113									SGCE	265
ENSDARG00000014685	140	ENSDARG00000070833	113									FGFR1	265
ENSDARG00000075542	140	ENSDARG00000068401	113									NANS	265
ENSDARG00000004785	140	ENSDARG00000098992	113									ANXA7	265
ENSDARG00000012987	140	ENSDARG00000078865	113									LSMD1	265
ENSDARG00000055945	139	ENSDARG00000040713	113									CCDC47	265
ENSDARG00000032405	139	ENSDARG00000077456	113									PCSK2	265
ENSDARG00000103316	139	ENSDARG00000102353	112									CHCHD7	264
ENSDARG00000078386	139	ENSDARG00000053129	112									JMJD1C	264
ENSDARG00000098466	139	ENSDARG00000074667	112									KPNA2	264
ENSDARG00000018010	139	ENSDARG00000027357	112									TGOLN2	263
ENSDARG00000103409	139	ENSDARG00000043857	112									ADD1	263
ENSDARG00000036510	139	ENSDARG00000070787	112									MED10	263
ENSDARG00000015835	139	ENSDARG00000099966	112									ARMCX3	263
ENSDARG00000043713	138	ENSDARG00000015757	112									FAM204A	263
ENSDARG00000039142	138	ENSDARG00000026967	112									MRPL23	263
ENSDARG00000028848	138	ENSDARG00000069142	112									ACTR10	263
ENSDARG00000037928	138	ENSDARG00000030402	112									SLTM	263
ENSDARG00000101680	138	ENSDARG00000042642	112									SH3GLB1	262
ENSDARG00000054540	138	ENSDARG00000043074	112									TRAK2	262
ENSDARG00000103057	138	ENSDARG00000058560	112									BOD1L1	262
ENSDARG00000011999	138	ENSDARG00000087238	112									FBXO32	262
ENSDARG00000087779	138	ENSDARG00000004525	111									C9orf16	262
ENSDARG00000104458	138	ENSDARG00000061774	111									TNFRSF1A	261
ENSDARG00000068640	138	ENSDARG00000017762	111									FOXO1	261
ENSDARG00000039667	138	ENSDARG00000000103	111									ABHD14B	260
ENSDARG00000092112	138	ENSDARG00000036299	111									TSC22D2	260
ENSDARG00000100514	138	ENSDARG00000016156	111									CCDC50	260
ENSDARG00000014731	137	ENSDARG00000089637	111									LARP7	260
ENSDARG00000026839	137	ENSDARG00000003308	111									HLA-DPB1	260
ENSDARG00000008840	137	ENSDARG00000009494	111									MPC1	260
ENSDARG00000099122	137	ENSDARG00000015206	111									DCTN6	260
ENSDARG00000101161	137	ENSDARG00000026473	111									ARHGDIB	260
ENSDARG00000036721	137	ENSDARG00000008551	110									CDK4	260
ENSDARG00000098992	137	ENSDARG00000058044	110									TMEM259	260
ENSDARG00000076486	137	ENSDARG00000034056	110									SYNCRIP	259
ENSDARG00000000069	137	ENSDARG00000054154	110									GTF3C6	259
ENSDARG00000018319	136	ENSDARG00000074266	109									AAED1	259
ENSDARG00000015559	136	ENSDARG00000070866	109									UPF2	259
ENSDARG00000020679	136	ENSDARG00000054849	109									DYNC1H1	259
ENSDARG00000036060	136	ENSDARG00000054010	109									USP22	259
ENSDARG00000091931	136	ENSDARG00000003808	109									TSG101	258
ENSDARG00000071203	136	ENSDARG00000007196	109									YPEL3	258
ENSDARG00000053485	136	ENSDARG00000009346	109									TAX1BP3	258
ENSDARG00000099959	136	ENSDARG00000103057	109									DMKN	258
ENSDARG00000052641	135	ENSDARG00000016830	109									PSMA5	257
ENSDARG00000033614	135	ENSDARG00000079964	109									IAH1	257
ENSDARG00000097445	135	ENSDARG00000056085	109									SAP30	257
ENSDARG00000020377	135	ENSDARG00000020573	109									PNPLA8	257
ENSDARG00000024278	135	ENSDARG00000076074	109									FAM50A	257
ENSDARG00000026967	135	ENSDARG00000086881	109									EMP2	257
ENSDARG00000101481	135	ENSDARG00000100585	109									CTDNEP1	257
ENSDARG00000087443	135	ENSDARG00000101710	109									PLD3	257
ENSDARG00000042934	135	ENSDARG00000052928	109									IFT57	256
ENSDARG00000028894	135	ENSDARG00000104889	109									ATP6V1C1	256
ENSDARG00000003607	134	ENSDARG00000038954	109									CHP1	256
ENSDARG00000026476	134	ENSDARG00000052480	108									PPT1	255
ENSDARG00000035018	134	ENSDARG00000026712	108									AUP1	255
ENSDARG00000075743	134	ENSDARG00000032619	108									SMARCA5	255
ENSDARG00000038473	134	ENSDARG00000098635	108									SREK1	255
ENSDARG00000031434	134	ENSDARG00000098785	108									DUSP5	255
ENSDARG00000068404	134	ENSDARG00000100244	108									ARG2	255
ENSDARG00000032606	134	ENSDARG00000026225	108									CMTM6	254
ENSDARG00000036855	134	ENSDARG00000023672	108									HMGCS1	254
ENSDARG00000035858	133	ENSDARG00000052567	108									DDX46	254
ENSDARG00000070822	133	ENSDARG00000040695	108									MALSU1	254
ENSDARG00000102320	133	ENSDARG00000092112	108									NDUFS3	254
ENSDARG00000095896	133	ENSDARG00000058292	108									DDB1	254
ENSDARG00000013822	133	ENSDARG00000026634	108									NAPA	254
ENSDARG00000089637	133	ENSDARG00000037928	107									NDUFA10	253
ENSDARG00000103203	133	ENSDARG00000002168	107									NKTR	253
ENSDARG00000014274	133	ENSDARG00000004280	107									PAIP1	253
ENSDARG00000019060	133	ENSDARG00000028971	107									SERPINB1	253
ENSDARG00000061735	133	ENSDARG00000110608	107									PLS3	253
ENSDARG00000045296	133	ENSDARG00000079632	106									LPL	253
ENSDARG00000010008	133	ENSDARG00000039338	106									ANP32A	253
ENSDARG00000045773	133	ENSDARG00000051957	106									SEMA4A	252
ENSDARG00000052480	132	ENSDARG00000017728	106									SEC63	252
ENSDARG00000019765	132	ENSDARG00000069289	106									RPGR	252
ENSDARG00000008867	132	ENSDARG00000013670	106									ATP6AP1	252
ENSDARG00000092035	132	ENSDARG00000013968	106									FABP5	252
ENSDARG00000099236	132	ENSDARG00000100514	106									SDC2	252
ENSDARG00000040944	132	ENSDARG00000074201	106									UBE2D1	252
ENSDARG00000004280	132	ENSDARG00000076486	106									GNPTAB	252
ENSDARG00000061458	132	ENSDARG00000033965	106									ELF1	252
ENSDARG00000041895	132	ENSDARG00000115281	106									SAP30BP	252
ENSDARG00000074201	132	ENSDARG00000021924	105									POLR2E	252
ENSDARG00000101332	132	ENSDARG00000032129	105									BACE2	252
ENSDARG00000070560	132	ENSDARG00000094300	105									PON2	251
ENSDARG00000075795	131	ENSDARG00000042525	105									LAGE3	251
ENSDARG00000058030	131	ENSDARG00000057782	105									SCRG1	250
ENSDARG00000092033	131	ENSDARG00000052063	105									PJA2	250
ENSDARG00000062147	131	ENSDARG00000076966	105									ECHS1	250
ENSDARG00000112087	131	ENSDARG00000105018	105									ACAT1	250
ENSDARG00000100116	131	ENSDARG00000021112	105									ALDH2	250
ENSDARG00000100585	131	ENSDARG00000091931	105									PCDH9	250
ENSDARG00000071691	131	ENSDARG00000069855	105									PSMD7	250
ENSDARG00000010792	131	ENSDARG00000041895	105									PAFAH1B1	250
ENSDARG00000009253	131	ENSDARG00000044811	105									CABLES1	250
ENSDARG00000044402	131	ENSDARG00000028106	105									ACSL3	249
ENSDARG00000008407	131	ENSDARG00000110357	105									CUL3	249
ENSDARG00000045733	131	ENSDARG00000000069	105									KPNA4	249
ENSDARG00000096668	130	ENSDARG00000002190	104									MRPL18	249
ENSDARG00000045542	130	ENSDARG00000015559	104									STOML2	249
ENSDARG00000094300	130	ENSDARG00000011683	104									UGCG	249
ENSDARG00000067984	130	ENSDARG00000014763	104									EAPP	249
ENSDARG00000054906	130	ENSDARG00000015921	104									COTL1	249
ENSDARG00000044437	130	ENSDARG00000102320	104									TSC22D4	248
ENSDARG00000000103	130	ENSDARG00000055753	104									MRPL43	248
ENSDARG00000043402	130	ENSDARG00000036684	104									ARF6	248
ENSDARG00000075621	130	ENSDARG00000068123	104									PSMA4	248
ENSDARG00000098334	130	ENSDARG00000011613	104									DYNLL2	248
ENSDARG00000078164	130	ENSDARG00000002632	104									CBX4	248
ENSDARG00000092136	130	ENSDARG00000068978	104									HSPG2	247
ENSDARG00000022995	130	ENSDARG00000025071	104									HAX1	247
ENSDARG00000058292	130	ENSDARG00000089441	104									FAM127A	247
ENSDARG00000028106	130	ENSDARG00000091079	104									STAM	247
ENSDARG00000023536	130	ENSDARG00000019062	104									CREM	247
ENSDARG00000099675	130	ENSDARG00000075508	104									FEZ1	247
ENSDARG00000038737	130	ENSDARG00000093007	104									LPAR6	247
ENSDARG00000070723	130	ENSDARG00000031164	103									RRBP1	247
ENSDARG00000051800	130	ENSDARG00000052641	103									TMEM205	247
ENSDARG00000073710	129	ENSDARG00000038239	103									HNRNPL	247
ENSDARG00000004034	129	ENSDARG00000075380	103									GNAI3	246
ENSDARG00000025301	129	ENSDARG00000019191	103									UBE2E1	246
ENSDARG00000057782	129	ENSDARG00000060150	103									DNAJC19	246
ENSDARG00000014015	129	ENSDARG00000012066	103									PXDC1	246
ENSDARG00000070431	128	ENSDARG00000018902	103									NRN1	246
ENSDARG00000034189	128	ENSDARG00000004251	103									SNRPC	246
ENSDARG00000007196	128	ENSDARG00000015292	103									SYAP1	246
ENSDARG00000014083	128	ENSDARG00000101808	103									RCN1	246
ENSDARG00000043502	128	ENSDARG00000095896	103									MMP14	246
ENSDARG00000006074	128	ENSDARG00000044301	103									COPS2	246
ENSDARG00000055753	128	ENSDARG00000007359	103									SNHG9	246
ENSDARG00000068123	128	ENSDARG00000109373	103									STAU1	246
ENSDARG00000069065	128	ENSDARG00000026577	103									C1orf85	245
ENSDARG00000060457	128	ENSDARG00000024278	103									SCARB2	245
ENSDARG00000016156	128	ENSDARG00000004527	103									NHP2	245
ENSDARG00000037675	128	ENSDARG00000023190	103									GLUD1	245
ENSDARG00000002538	128	ENSDARG00000087443	103									ARL3	245
ENSDARG00000004527	128	ENSDARG00000031434	103									CCDC85B	245
ENSDARG00000037402	128	ENSDARG00000040557	103									COPS8	244
ENSDARG00000042969	128	ENSDARG00000036698	103									RNF13	244
ENSDARG00000039958	128	ENSDARG00000006524	103									STX3	244
ENSDARG00000016763	128	ENSDARG00000027740	102									SAV1	244
ENSDARG00000045367	128	ENSDARG00000020015	102									INSR	244
ENSDARG00000012672	127	ENSDARG00000028688	102									MT-ND6	244
ENSDARG00000017728	127	ENSDARG00000099309	102									CIR1	243
ENSDARG00000103845	127	ENSDARG00000088087	102									SPATS2L	243
ENSDARG00000016363	127	ENSDARG00000036593	102									DNAJB2	243
ENSDARG00000068567	127	ENSDARG00000042835	102									SEC31A	243
ENSDARG00000057317	127	ENSDARG00000058230	102									EIF4E	243
ENSDARG00000043493	127	ENSDARG00000015638	102									HBEGF	243
ENSDARG00000099966	127	ENSDARG00000016763	102									IDS	243
ENSDARG00000015649	127	ENSDARG00000099675	102									KCTD12	243
ENSDARG00000101009	127	ENSDARG00000045296	102									SNORA76	243
ENSDARG00000040059	127	ENSDARG00000001940	101									NARS	243
ENSDARG00000091655	127	ENSDARG00000014731	101									COL6A1	243
ENSDARG00000103403	127	ENSDARG00000089382	101									LTBP3	242
ENSDARG00000037846	127	ENSDARG00000032997	101									PSMD12	242
ENSDARG00000056338	127	ENSDARG00000062646	101									PLSCR1	241
ENSDARG00000006642	126	ENSDARG00000044182	101									PAK2	241
ENSDARG00000060004	126	ENSDARG00000031388	101									ATN1	241
ENSDARG00000015638	126	ENSDARG00000015554	101									MBP	241
ENSDARG00000062506	126	ENSDARG00000007294	101									TNFSF9	241
ENSDARG00000018574	126	ENSDARG00000057890	101									CYB5R3	241
ENSDARG00000033855	126	ENSDARG00000103443	101									JAK1	240
ENSDARG00000046030	126	ENSDARG00000023003	101									SDHC	240
ENSDARG00000070109	125	ENSDARG00000043873	101									RGS2	240
ENSDARG00000068177	125	ENSDARG00000101085	101									KCMF1	240
ENSDARG00000078904	125	ENSDARG00000089204	101									PDGFA	240
ENSDARG00000004251	125	ENSDARG00000027734	101									TMED4	240
ENSDARG00000104169	125	ENSDARG00000054906	100									FDFT1	240
ENSDARG00000031261	125	ENSDARG00000007034	100									MBD2	240
ENSDARG00000086416	125	ENSDARG00000013031	100									CDKN2AIP	239
ENSDARG00000031560	125	ENSDARG00000036489	100									RBPMS	239
ENSDARG00000102624	125	ENSDARG00000010641	100									WHSC1L1	239
ENSDARG00000032985	125	ENSDARG00000068640	100									HABP4	239
ENSDARG00000006003	125	ENSDARG00000096631	100									SECISBP2L	239
ENSDARG00000013150	125	ENSDARG00000070985	100									A1BG	239
ENSDARG00000033172	125	ENSDARG00000015835	100									PSMD2	238
ENSDARG00000013729	125	ENSDARG00000102889	100									ZBTB16	238
ENSDARG00000061547	124											PABPN1	238
ENSDARG00000059483	124											SYNE2	238
ENSDARG00000010721	124											RPAIN	238
ENSDARG00000074271	124											FAM210B	238
ENSDARG00000026448	124											CGGBP1	237
ENSDARG00000001890	124											EEA1	237
ENSDARG00000099745	124											PSMG2	237
ENSDARG00000089204	124											TXNL4A	237
ENSDARG00000101295	124											NDUFV3	237
ENSDARG00000051748	124											PHLDB1	236
ENSDARG00000008370	123											PSMB2	236
ENSDARG00000092677	123											AIMP1	236
ENSDARG00000042428	123											NR3C1	236
ENSDARG00000007359	123											C5orf45	236
ENSDARG00000002304	123											MRPL14	236
ENSDARG00000068401	123											FBXW5	236
ENSDARG00000110608	123											HECTD1	236
ENSDARG00000012341	122											TXNDC17	236
ENSDARG00000042894	122											LINC00910	236
ENSDARG00000003098	122											TROVE2	235
ENSDARG00000033647	122											MDM4	235
ENSDARG00000039429	122											ROCK2	235
ENSDARG00000058206	122											MMADHC	235
ENSDARG00000040076	122											MSN	235
ENSDARG00000044153	122											PPP2R2A	235
ENSDARG00000101626	122											SFRP5	235
ENSDARG00000008886	121											ILK	235
ENSDARG00000001940	121											CNIH1	235
ENSDARG00000056475	121											RCN2	235
ENSDARG00000014763	121											PTPN1	235
ENSDARG00000015921	121											ASH1L	234
ENSDARG00000007405	121											CTSC	234
ENSDARG00000012495	121											NFAT5	234
ENSDARG00000002506	121											BAIAP2	234
ENSDARG00000109373	121											CYB5A	234
ENSDARG00000005738	121											NAA20	234
ENSDARG00000086881	121											VAMP3	233
ENSDARG00000071445	121											SRM	233
ENSDARG00000052721	121											ARPC4	233
ENSDARG00000040555	121											CHMP2B	233
ENSDARG00000045797	121											C4orf48	233
ENSDARG00000038228	120											TBC1D7	233
ENSDARG00000019191	120											TRAM1	233
ENSDARG00000017841	120											OSBPL8	233
ENSDARG00000010316	120											SLC7A8	233
ENSDARG00000016649	120											TMEM50B	233
ENSDARG00000101877	120											STX12	232
ENSDARG00000068978	120											RNF103	232
ENSDARG00000037570	120											SLC20A1	232
ENSDARG00000079150	120											CLCN7	232
ENSDARG00000038882	120											CYLD	232
ENSDARG00000059304	120											SNF8	232
ENSDARG00000058230	120											MRPS7	232
ENSDARG00000032802	120											EPHX1	231
ENSDARG00000103027	120											FOXO3	231
ENSDARG00000035987	120											TERF1	231
ENSDARG00000100114	120											PIN1	231
ENSDARG00000011000	120											PTOV1	231
ENSDARG00000017740	120											CBX6	231
ENSDARG00000044811	120											SPCS3	230
ENSDARG00000038954	120											PDLIM4	230
ENSDARG00000101733	120											H2AFY	230
ENSDARG00000038743	119											SRPK2	230
ENSDARG00000069056	119											GOLGA7	230
ENSDARG00000093622	119											PSME2	230
ENSDARG00000024465	119											JMJD6	230
ENSDARG00000007034	119											TGIF1	230
ENSDARG00000003081	119											UAP1	229
ENSDARG00000069432	119											CCDC104	229
ENSDARG00000056085	119											LIMS1	229
ENSDARG00000002523	119											GRPEL1	229
ENSDARG00000013670	119											JADE1	229
ENSDARG00000013734	119											PTTG1	229
ENSDARG00000040162	119											SLC39A14	229
ENSDARG00000052893	119											KRR1	229
ENSDARG00000003382	118											LRP10	229
ENSDARG00000098934	118											BCL7C	229
ENSDARG00000039338	118											PSMD3	229
ENSDARG00000075380	118											ODF2L	228
ENSDARG00000029263	118											NDUFS2	228
ENSDARG00000095908	118											SKIL	228
ENSDARG00000062646	118											VDAC3	228
ENSDARG00000021193	118											C9orf78	228
ENSDARG00000013031	118											GSPT1	228
ENSDARG00000076857	118											RALY	228
ENSDARG00000040822	118											GDF15	228
ENSDARG00000021372	118											SCAND1	227
ENSDARG00000058115	118											RNF11	227
ENSDARG00000014517	118											ZRANB2	227
ENSDARG00000039913	118											TANK	227
ENSDARG00000007065	118											RBM5	227
ENSDARG00000044751	118											ROPN1B	227
ENSDARG00000034013	118											TMEM165	227
ENSDARG00000038027	117											RPF2	227
ENSDARG00000022232	117											KMT2A	227
ENSDARG00000015292	117											ECI1	227
ENSDARG00000042534	117											SLC44A2	227
ENSDARG00000010962	117											FXYD5	227
ENSDARG00000011611	117											ORMDL1	226
ENSDARG00000075677	117											SCOC	226
ENSDARG00000020890	117											PTP4A1	226
ENSDARG00000043873	117											VPS51	226
ENSDARG00000091001	117											PPP1CA	226
ENSDARG00000104451	117											FOXN3	226
ENSDARG00000003469	117											BLOC1S6	226
ENSDARG00000044760	117											MESDC2	226
ENSDARG00000075508	117											TRIB2	225
ENSDARG00000091402	116											UGP2	225
ENSDARG00000008494	116											JAGN1	225
ENSDARG00000045019	116											ZBTB20	225
ENSDARG00000026842	116											FSTL1	225
ENSDARG00000052244	116											SDHA	225
ENSDARG00000075682	116											DNAJC21	225
ENSDARG00000044942	116											YWHAG	225
ENSDARG00000075625	116											TCEAL3	225
ENSDARG00000026225	116											SWAP70	225
ENSDARG00000013763	116											ANKRD10	225
ENSDARG00000068698	116											TJP1	225
ENSDARG00000098080	116											PLEKHM2	224
ENSDARG00000098367	116											FAM134A	224
ENSDARG00000034600	116											AP3S1	224
ENSDARG00000093052	116											NAA38	224
ENSDARG00000044625	116											GRHPR	224
ENSDARG00000062916	115											TPP1	224
ENSDARG00000007241	115											AIP	224
ENSDARG00000058148	115											MAPK1IP1L	224
ENSDARG00000005254	115											CIB1	224
ENSDARG00000099624	115											SRSF1	224
ENSDARG00000035324	115											CHMP1B	224
ENSDARG00000076572	115											ABHD17A	224
ENSDARG00000102056	115											FGD5-AS1	223
ENSDARG00000053862	115											MAP3K13	223
ENSDARG00000021112	115											TWISTNB	223
ENSDARG00000057378	115											WBSCR22	223
ENSDARG00000029100	115											SOX6	223
ENSDARG00000052975	115											CHMP4A	223
ENSDARG00000001129	115											SMIM7	223
ENSDARG00000054213	115											SORT1	222
ENSDARG00000070985	115											IRF2BP2	222
ENSDARG00000006251	115											NABP1	222
ENSDARG00000110357	115											RFC1	222
ENSDARG00000057624	115											ANKRD37	222
ENSDARG00000018272	114											NIPBL	222
ENSDARG00000005058	114											SGCD	222
ENSDARG00000101808	114											HDAC2	222
ENSDARG00000058079	114											SORBS3	222
ENSDARG00000025977	114											RAD23B	222
ENSDARG00000007693	114											CTNND1	222
ENSDARG00000027649	114											ERGIC2	222
ENSDARG00000007823	114											MED4	222
ENSDARG00000031216	114											EIF2S1	222
ENSDARG00000103783	113											ZFAND6	222
ENSDARG00000010381	113											C17orf89	222
ENSDARG00000024829	113											LSM14A	222
ENSDARG00000070568	113											MAP7D1	221
ENSDARG00000035634	113											FOXD3	221
ENSDARG00000067639	113											ACTR2	221
ENSDARG00000053685	113											ZMAT2	221
ENSDARG00000020573	113											TRIP6	221
ENSDARG00000071425	113											PRUNE2	221
ENSDARG00000074624	113											SMC3	221
ENSDARG00000068582	113											SLC22A17	221
ENSDARG00000094277	113											PRPF8	221
ENSDARG00000042796	113											AP2B1	221
ENSDARG00000061338	113											VEZF1	221
ENSDARG00000077664	113											TRAPPC3	220
ENSDARG00000099420	113											PSMD6	220
ENSDARG00000043680	113											MBNL1	220
ENSDARG00000033596	113											RAP2B	220
ENSDARG00000007387	112											SENP6	220
ENSDARG00000008131	112											CPNE3	220
ENSDARG00000077361	112											PCBD1	220
ENSDARG00000052816	112											CNOT2	220
ENSDARG00000039350	112											MVP	220
ENSDARG00000052182	112											GSTT1	220
ENSDARG00000101277	112											POU3F1	219
ENSDARG00000016345	112											USP34	219
ENSDARG00000019223	112											WDR33	219
ENSDARG00000091419	112											MFF	219
ENSDARG00000018146	112											PIN4	219
ENSDARG00000096711	112											SIRT1	219
ENSDARG00000071497	112											CDIPT	219
ENSDARG00000010745	112											GOSR1	219
ENSDARG00000032103	112											OSBPL1A	219
ENSDARG00000089921	112											LMAN1	219
ENSDARG00000098589	112											LPGAT1	218
ENSDARG00000037654	111											NAA50	218
ENSDARG00000018241	111											MRPL47	218
ENSDARG00000036684	111											ARL4A	218
ENSDARG00000041991	111											PTK2	218
ENSDARG00000069118	111											GRINA	218
ENSDARG00000056627	111											PRRC2B	218
ENSDARG00000000394	111											ENDOD1	218
ENSDARG00000114552	111											MED13L	218
ENSDARG00000058729	111											PSMF1	218
ENSDARG00000041226	111											DAZAP1	218
ENSDARG00000038456	111											ATP2B4	217
ENSDARG00000102889	111											STK17A	217
ENSDARG00000103379	111											BCL7B	217
ENSDARG00000103747	111											PTPN12	217
ENSDARG00000006621	110											ZCCHC24	217
ENSDARG00000079202	110											NRXN3	217
ENSDARG00000044301	110											LRRC59	217
ENSDARG00000039268	110											MMP24-AS1	217
ENSDARG00000017014	110											FDPS	216
ENSDARG00000011079	110											HSD17B11	216
ENSDARG00000055635	110											SERPINH1	216
ENSDARG00000026180	110											DNAJC15	216
ENSDARG00000003487	110											TMOD2	216
ENSDARG00000012422	110											ATP6V0D1	216
ENSDARG00000021143	110											ARL4D	216
ENSDARG00000058725	110											AFG3L2	216
ENSDARG00000025889	109											ASXL1	216
ENSDARG00000014522	109											ASNSD1	215
ENSDARG00000053101	109											RPN1	215
ENSDARG00000099371	109											ZNF622	215
ENSDARG00000018903	109											TMED7	215
ENSDARG00000012684	109											GGCT	215
ENSDARG00000015161	109											POLD4	215
ENSDARG00000005315	109											C16orf13	215
ENSDARG00000030161	109											EMC6	215
ENSDARG00000044820	109											ROCK1	215
ENSDARG00000002632	109											ADIPOR1	214
ENSDARG00000022410	109											NIFK	214
ENSDARG00000025071	109											FN1	214
ENSDARG00000099744	109											CADM2	214
ENSDARG00000103127	109											TIMMDC1	214
ENSDARG00000070589	109											BDH2	214
ENSDARG00000042620	109											RNF145	214
ENSDARG00000017658	109											C7orf55	214
ENSDARG00000054010	108											ABLIM1	214
[truncated: 2,169 more rows]

## Sheet: Table S3. DIOPT list
diopt_results_2022-04-14 11:12:05
Input Order	Search Term	Zebrafish GeneID	ZFINID	Zebrafish Symbol	Species 2	Human GeneID	Human Species Gene ID	Human Symbol	Ensmbl ID (link HPA)	DIOPT Score	Weighted Score	Rank	Best Score	Best Score Reverse	Prediction Derived From	Alignment & Scores	Feedback	Gene Details
1	ENSDARG00000095072	100537665	ZDB-GENE-121214-36	si:dkey-26g8.4	Human	1514	2537	CTSL	ENSG00000135047	6	5.83	moderate	Yes	No	eggNOG, Hieranoid, OMA, OrthoDB, OrthoFinder, Phylome		Add	G2F details (CTSL) DRscDB Data: (CTSL) Human Protein Atlas (HPA)
1	ENSDARG00000095072	100537665	ZDB-GENE-121214-36	si:dkey-26g8.4	Human	1515	2538	CTSV	ENSG00000136943	6	5.83	moderate	Yes	No	eggNOG, Hieranoid, OMA, OrthoDB, OrthoFinder, Phylome		Add	G2F details (CTSV) DRscDB Data: (CTSV) Human Protein Atlas (HPA)
2	ENSDARG00000094559	569326	ZDB-GENE-071004-74	zgc:174855	Human	1514	2537	CTSL	ENSG00000135047	8	8.04	moderate	Yes	No	Inparanoid, OMA, OrthoDB, OrthoFinder, OrthoInspector, Panther, Phylome, TreeFam		Add	G2F details (CTSL) DRscDB Data: (CTSL) Human Protein Atlas (HPA)
2	ENSDARG00000094559	569326	ZDB-GENE-071004-74	zgc:174855	Human	1515	2538	CTSV	ENSG00000136943	8	8.04	moderate	Yes	No	Inparanoid, OMA, OrthoDB, OrthoFinder, OrthoInspector, Panther, Phylome, TreeFam		Add	G2F details (CTSV) DRscDB Data: (CTSV) Human Protein Atlas (HPA)
4	ENSDARG00000039173	30443	ZDB-GENE-980526-285	ctslb	Human	1515	2538	CTSV	ENSG00000136943	10	9.94	moderate	No	Yes	eggNOG, Hieranoid, Inparanoid, OMA, OrthoDB, OrthoFinder, OrthoInspector, Panther, Phylome, TreeFam		Add	G2F details (CTSV) DRscDB Data: (CTSV) Human Protein Atlas (HPA)
6	ENSDARG00000032929	550433	ZDB-GENE-050417-249	cryba1l1	Human	1411	2394	CRYBA1	ENSG00000108255	4	4.01	moderate	Yes	No	eggNOG, OrthoDB, OrthoFinder, Panther		Add	G2F details (CRYBA1) DRscDB Data: (CRYBA1) Human Protein Atlas (HPA)
6	ENSDARG00000032929	550433	ZDB-GENE-050417-249	cryba1l1	Human	1413	2396	CRYBA4	ENSG00000196431	4	3.87	moderate	Yes	No	eggNOG, OrthoDB, OrthoFinder, TreeFam		Add	G2F details (CRYBA4) DRscDB Data: (CRYBA4) Human Protein Atlas (HPA)
7	ENSDARG00000079376	567623	ZDB-GENE-080215-7	zgc:174153	Human	1514	2537	CTSL	ENSG00000135047	7	6.89	moderate	Yes	No	eggNOG, OMA, OrthoDB, OrthoFinder, Panther, Phylome, TreeFam		Add	G2F details (CTSL) DRscDB Data: (CTSL) Human Protein Atlas (HPA)
7	ENSDARG00000079376	567623	ZDB-GENE-080215-7	zgc:174153	Human	1515	2538	CTSV	ENSG00000136943	7	6.89	moderate	Yes	No	eggNOG, OMA, OrthoDB, OrthoFinder, Panther, Phylome, TreeFam		Add	G2F details (CTSV) DRscDB Data: (CTSV) Human Protein Atlas (HPA)
8	ENSDARG00000095254	321853	ZDB-GENE-121214-52	si:dkey-239j18.2	Human	1514	2537	CTSL	ENSG00000135047	8	7.94	moderate	Yes	No	eggNOG, Inparanoid, OMA, OrthoDB, OrthoFinder, Panther, Phylome, TreeFam		Add	G2F details (CTSL) DRscDB Data: (CTSL) Human Protein Atlas (HPA)
8	ENSDARG00000095254	321853	ZDB-GENE-121214-52	si:dkey-239j18.2	Human	1515	2538	CTSV	ENSG00000136943	8	7.94	moderate	Yes	No	eggNOG, Inparanoid, OMA, OrthoDB, OrthoFinder, Panther, Phylome, TreeFam		Add	G2F details (CTSV) DRscDB Data: (CTSV) Human Protein Atlas (HPA)
9	ENSDARG00000100833	100536033		LOC100536033	Human	1514	2537	CTSL	ENSG00000135047	6	5.93	moderate	Yes	No	eggNOG, Inparanoid, OMA, OrthoDB, OrthoFinder, TreeFam		Add	G2F details (CTSL) DRscDB Data: (CTSL) Human Protein Atlas (HPA)
9	ENSDARG00000100833	100536033		LOC100536033	Human	1515	2538	CTSV	ENSG00000136943	6	5.93	moderate	Yes	No	eggNOG, Inparanoid, OMA, OrthoDB, OrthoFinder, TreeFam		Add	G2F details (CTSV) DRscDB Data: (CTSV) Human Protein Atlas (HPA)
11	ENSDARG00000089750	563390	ZDB-GENE-121214-19	si:dkey-26g8.5	Human	1514	2537	CTSL	ENSG00000135047	7	7.03	moderate	Yes	No	Hieranoid, OMA, OrthoDB, OrthoFinder, OrthoInspector, Panther, Phylome		Add	G2F details (CTSL) DRscDB Data: (CTSL) Human Protein Atlas (HPA)
11	ENSDARG00000089750	563390	ZDB-GENE-121214-19	si:dkey-26g8.5	Human	1515	2538	CTSV	ENSG00000136943	7	7.03	moderate	Yes	No	Hieranoid, OMA, OrthoDB, OrthoFinder, OrthoInspector, Panther, Phylome		Add	G2F details (CTSV) DRscDB Data: (CTSV) Human Protein Atlas (HPA)
12	ENSDARG00000053875	436859	ZDB-GENE-040718-326	cryba1b	Human	1411	2394	CRYBA1	ENSG00000108255	6	6.48	moderate	Yes	No	OrthoDB, OrthoFinder, Panther, Phylome, TreeFam, ZFIN		Add	G2F details (CRYBA1) DRscDB Data: (CRYBA1) Human Protein Atlas (HPA)
13	ENSDARG00000096905	100334274	ZDB-GENE-131127-400	si:ch73-23l24.1	Human	150677	22644	OTOS	ENSG00000178602	2	2	moderate	Yes	No	eggNOG, Panther		Add	G2F details (OTOS) DRscDB Data: (OTOS) Human Protein Atlas (HPA)
14	ENSDARG00000074306	564979	ZDB-GENE-030131-5289	wu:fa26c03	Human	1514	2537	CTSL	ENSG00000135047	6	5.79	moderate	Yes	No	eggNOG, OMA, OrthoDB, OrthoFinder, Phylome, TreeFam		Add	G2F details (CTSL) DRscDB Data: (CTSL) Human Protein Atlas (HPA)
14	ENSDARG00000074306	564979	ZDB-GENE-030131-5289	wu:fa26c03	Human	1515	2538	CTSV	ENSG00000136943	6	5.79	moderate	Yes	No	eggNOG, OMA, OrthoDB, OrthoFinder, Phylome, TreeFam		Add	G2F details (CTSV) DRscDB Data: (CTSV) Human Protein Atlas (HPA)
14	ENSDARG00000074306	564906		MGC174155	Human	1514	2537	CTSL	ENSG00000135047	4	3.87	moderate	Yes	No	eggNOG, OMA, OrthoFinder, TreeFam		Add	G2F details (CTSL) DRscDB Data: (CTSL) Human Protein Atlas (HPA)
14	ENSDARG00000074306	564906		MGC174155	Human	1515	2538	CTSV	ENSG00000136943	4	3.87	moderate	Yes	No	eggNOG, OMA, OrthoFinder, TreeFam		Add	G2F details (CTSV) DRscDB Data: (CTSV) Human Protein Atlas (HPA)
15	ENSDARG00000087651	564906		MGC174155	Human	1514	2537	CTSL	ENSG00000135047	4	3.87	moderate	Yes	No	eggNOG, OMA, OrthoFinder, TreeFam		Add	G2F details (CTSL) DRscDB Data: (CTSL) Human Protein Atlas (HPA)
15	ENSDARG00000087651	564906		MGC174155	Human	1515	2538	CTSV	ENSG00000136943	4	3.87	moderate	Yes	No	eggNOG, OMA, OrthoFinder, TreeFam		Add	G2F details (CTSV) DRscDB Data: (CTSV) Human Protein Atlas (HPA)
16	ENSDARG00000095744	564835	ZDB-GENE-121214-37	si:dkey-269i1.4	Human	1514	2537	CTSL	ENSG00000135047	7	6.89	moderate	Yes	No	eggNOG, OMA, OrthoDB, OrthoFinder, Panther, Phylome, TreeFam		Add	G2F details (CTSL) DRscDB Data: (CTSL) Human Protein Atlas (HPA)
16	ENSDARG00000095744	564835	ZDB-GENE-121214-37	si:dkey-269i1.4	Human	1515	2538	CTSV	ENSG00000136943	7	6.89	moderate	Yes	No	eggNOG, OMA, OrthoDB, OrthoFinder, Panther, Phylome, TreeFam		Add	G2F details (CTSV) DRscDB Data: (CTSV) Human Protein Atlas (HPA)
17	ENSDARG00000045143	405772	ZDB-GENE-040702-1	hbbe2	Human	3046	4830	HBE1	ENSG00000213931	10	9.82	moderate	Yes	No	Compara, eggNOG, Homologene, OMA, OrthoDB, OrthoFinder, OrthoInspector, Panther, Phylome, TreeFam		Add	G2F details (HBE1) DRscDB Data: (HBE1) Human Protein Atlas (HPA)
17	ENSDARG00000045143	405772	ZDB-GENE-040702-1	hbbe2	Human	3043	4827	HBB	ENSG00000244734	9	8.79	moderate	No	No	eggNOG, OMA, OrthoDB, OrthoFinder, OrthoInspector, orthoMCL, Panther, Phylome, TreeFam		Add	G2F details (HBB) DRscDB Data: (HBB) Human Protein Atlas (HPA)
17	ENSDARG00000045143	405772	ZDB-GENE-040702-1	hbbe2	Human	3048	4832	HBG2	ENSG00000196565	8	7.89	moderate	No	No	eggNOG, OMA, OrthoDB, OrthoFinder, OrthoInspector, Panther, Phylome, TreeFam		Add	G2F details (HBG2) DRscDB Data: (HBG2) Human Protein Atlas (HPA)
17	ENSDARG00000045143	405772	ZDB-GENE-040702-1	hbbe2	Human	3045	4829	HBD	ENSG00000223609	8	7.89	moderate	No	No	eggNOG, OMA, OrthoDB, OrthoFinder, OrthoInspector, Panther, Phylome, TreeFam		Add	G2F details (HBD) DRscDB Data: (HBD) Human Protein Atlas (HPA)
17	ENSDARG00000045143	405772	ZDB-GENE-040702-1	hbbe2	Human	3047	4831	HBG1	ENSG00000213934	8	7.89	moderate	No	No	eggNOG, OMA, OrthoDB, OrthoFinder, OrthoInspector, Panther, Phylome, TreeFam		Add	G2F details (HBG1) DRscDB Data: (HBG1) Human Protein Atlas (HPA)
21	ENSDARG00000007576	553473	ZDB-GENE-100112-3	crybb1l1	Human	1414	2397	CRYBB1	ENSG00000100122	5	4.97	moderate	Yes	No	eggNOG, OrthoDB, OrthoFinder, Panther, TreeFam		Add	G2F details (CRYBB1) DRscDB Data: (CRYBB1) Human Protein Atlas (HPA)
23	ENSDARG00000075527	100001785	ZDB-GENE-121214-39	si:dkey-239j18.3	Human	1514	2537	CTSL	ENSG00000135047	10	9.94	moderate	Yes	No	eggNOG, Hieranoid, Inparanoid, OMA, OrthoDB, OrthoFinder, OrthoInspector, Panther, Phylome, TreeFam		Add	G2F details (CTSL) DRscDB Data: (CTSL) Human Protein Atlas (HPA)
23	ENSDARG00000075527	569326	ZDB-GENE-071004-74	zgc:174855	Human	1514	2537	CTSL	ENSG00000135047	8	8.04	moderate	Yes	No	Inparanoid, OMA, OrthoDB, OrthoFinder, OrthoInspector, Panther, Phylome, TreeFam		Add	G2F details (CTSL) DRscDB Data: (CTSL) Human Protein Atlas (HPA)
23	ENSDARG00000075527	569326	ZDB-GENE-071004-74	zgc:174855	Human	1515	2538	CTSV	ENSG00000136943	8	8.04	moderate	Yes	No	Inparanoid, OMA, OrthoDB, OrthoFinder, OrthoInspector, Panther, Phylome, TreeFam		Add	G2F details (CTSV) DRscDB Data: (CTSV) Human Protein Atlas (HPA)
23	ENSDARG00000075527	564835	ZDB-GENE-121214-37	si:dkey-269i1.4	Human	1514	2537	CTSL	ENSG00000135047	7	6.89	moderate	Yes	No	eggNOG, OMA, OrthoDB, OrthoFinder, Panther, Phylome, TreeFam		Add	G2F details (CTSL) DRscDB Data: (CTSL) Human Protein Atlas (HPA)
23	ENSDARG00000075527	564835	ZDB-GENE-121214-37	si:dkey-269i1.4	Human	1515	2538	CTSV	ENSG00000136943	7	6.89	moderate	Yes	No	eggNOG, OMA, OrthoDB, OrthoFinder, Panther, Phylome, TreeFam		Add	G2F details (CTSV) DRscDB Data: (CTSV) Human Protein Atlas (HPA)
23	ENSDARG00000075527	100537591	ZDB-GENE-071004-116	zgc:174154	Human	1514	2537	CTSL	ENSG00000135047	5	4.82	moderate	Yes	No	eggNOG, OrthoDB, OrthoFinder, OrthoInspector, Phylome		Add	G2F details (CTSL) DRscDB Data: (CTSL) Human Protein Atlas (HPA)
23	ENSDARG00000075527	100537591	ZDB-GENE-071004-116	zgc:174154	Human	1515	2538	CTSV	ENSG00000136943	5	4.82	moderate	Yes	No	eggNOG, OrthoDB, OrthoFinder, OrthoInspector, Phylome		Add	G2F details (CTSV) DRscDB Data: (CTSV) Human Protein Atlas (HPA)
25	ENSDARG00000016793	560055	ZDB-GENE-070822-18	crybb1l2	Human	1414	2397	CRYBB1	ENSG00000100122	7	6.98	moderate	Yes	No	eggNOG, OMA, OrthoDB, OrthoFinder, OrthoInspector, Panther, TreeFam		Add	G2F details (CRYBB1) DRscDB Data: (CRYBB1) Human Protein Atlas (HPA)
26	ENSDARG00000015445	436680	ZDB-GENE-040718-104	lim2.4	Human	3982	6610	LIM2	ENSG00000105370	12	12.27	moderate	Yes	No	Compara, eggNOG, Inparanoid, OMA, OrthoDB, OrthoFinder, OrthoInspector, orthoMCL, Panther, Phylome, TreeFam, ZFIN		Add	G2F details (LIM2) DRscDB Data: (LIM2) Human Protein Atlas (HPA)
26	ENSDARG00000015445	436680	ZDB-GENE-040718-104	lim2.4	Human	125875	28511	CLDND2	ENSG00000160318	2	2.1	moderate	No	Yes	OrthoFinder, Panther		Add	G2F details (CLDND2) DRscDB Data: (CLDND2) Human Protein Atlas (HPA)
27	ENSDARG00000089806	100001785	ZDB-GENE-121214-39	si:dkey-239j18.3	Human	1514	2537	CTSL	ENSG00000135047	10	9.94	moderate	Yes	No	eggNOG, Hieranoid, Inparanoid, OMA, OrthoDB, OrthoFinder, OrthoInspector, Panther, Phylome, TreeFam		Add	G2F details (CTSL) DRscDB Data: (CTSL) Human Protein Atlas (HPA)
28	ENSDARG00000068974	573354	ZDB-GENE-050522-398	lim2.1	Human	3982	6610	LIM2	ENSG00000105370	6	6.47	moderate	Yes	No	eggNOG, OrthoDB, OrthoFinder, Panther, TreeFam, ZFIN		Add	G2F details (LIM2) DRscDB Data: (LIM2) Human Protein Atlas (HPA)
28	ENSDARG00000068974	573354	ZDB-GENE-050522-398	lim2.1	Human	125875	28511	CLDND2	ENSG00000160318	2	2.1	moderate	No	Yes	OrthoFinder, Panther		Add	G2F details (CLDND2) DRscDB Data: (CLDND2) Human Protein Atlas (HPA)
29	ENSDARG00000116164	436854	ZDB-GENE-040718-321	crygm2d8	Human	1420	2410	CRYGC	ENSG00000163254	2	2.03	moderate	Yes	No	Compara, Panther		Add	G2F details (CRYGC) DRscDB Data: (CRYGC) Human Protein Atlas (HPA)
29	ENSDARG00000116164	436854	ZDB-GENE-040718-321	crygm2d8	Human	1418	2408	CRYGA	ENSG00000168582	2	2.03	moderate	Yes	No	Compara, Panther		Add	G2F details (CRYGA) DRscDB Data: (CRYGA) Human Protein Atlas (HPA)
29	ENSDARG00000116164	436854	ZDB-GENE-040718-321	crygm2d8	Human	1419	2409	CRYGB	ENSG00000182187	2	2.03	moderate	Yes	No	Compara, Panther		Add	G2F details (CRYGB) DRscDB Data: (CRYGB) Human Protein Atlas (HPA)
29	ENSDARG00000116164	436854	ZDB-GENE-040718-321	crygm2d8	Human	1421	2411	CRYGD	ENSG00000118231	2	2.03	moderate	Yes	No	Compara, Panther		Add	G2F details (CRYGD) DRscDB Data: (CRYGD) Human Protein Atlas (HPA)
32	ENSDARG00000087765	100126134	ZDB-GENE-071004-96	crygm2d10	Human	1420	2410	CRYGC	ENSG00000163254	2	2.03	moderate	Yes	No	Compara, Panther		Add	G2F details (CRYGC) DRscDB Data: (CRYGC) Human Protein Atlas (HPA)
32	ENSDARG00000087765	100126134	ZDB-GENE-071004-96	crygm2d10	Human	1418	2408	CRYGA	ENSG00000168582	2	2.03	moderate	Yes	No	Compara, Panther		Add	G2F details (CRYGA) DRscDB Data: (CRYGA) Human Protein Atlas (HPA)
32	ENSDARG00000087765	100126134	ZDB-GENE-071004-96	crygm2d10	Human	1419	2409	CRYGB	ENSG00000182187	2	2.03	moderate	Yes	No	Compara, Panther		Add	G2F details (CRYGB) DRscDB Data: (CRYGB) Human Protein Atlas (HPA)
32	ENSDARG00000087765	100126134	ZDB-GENE-071004-96	crygm2d10	Human	1421	2411	CRYGD	ENSG00000118231	2	2.03	moderate	Yes	No	Compara, Panther		Add	G2F details (CRYGD) DRscDB Data: (CRYGD) Human Protein Atlas (HPA)
33	ENSDARG00000037285	445140	ZDB-GENE-040801-41	mipa	Human	359	634	AQP2	ENSG00000167580	3	3	moderate	No	Yes	eggNOG, OrthoFinder, Panther		Add	G2F details (AQP2) DRscDB Data: (AQP2) Human Protein Atlas (HPA)
33	ENSDARG00000037285	445140	ZDB-GENE-040801-41	mipa	Human	363	639	AQP6	ENSG00000086159	3	3	moderate	No	Yes	eggNOG, OrthoFinder, Panther		Add	G2F details (AQP6) DRscDB Data: (AQP6) Human Protein Atlas (HPA)
36	ENSDARG00000074001	554132	ZDB-GENE-050522-401	crygmxl2	Human	1419	2409	CRYGB	ENSG00000182187	3	3.04	moderate	Yes	No	Compara, OrthoDB, Panther		Add	G2F details (CRYGB) DRscDB Data: (CRYGB) Human Protein Atlas (HPA)
36	ENSDARG00000074001	554132	ZDB-GENE-050522-401	crygmxl2	Human	1421	2411	CRYGD	ENSG00000118231	3	3.04	moderate	Yes	No	Compara, OrthoDB, Panther		Add	G2F details (CRYGD) DRscDB Data: (CRYGD) Human Protein Atlas (HPA)
36	ENSDARG00000074001	554132	ZDB-GENE-050522-401	crygmxl2	Human	1420	2410	CRYGC	ENSG00000163254	3	3.04	moderate	Yes	No	Compara, OrthoDB, Panther		Add	G2F details (CRYGC) DRscDB Data: (CRYGC) Human Protein Atlas (HPA)
37	ENSDARG00000011166	30331	ZDB-GENE-980526-39	cahz	Human	377677	14914	CA13	ENSG00000185015	10	9.85	moderate	No	Yes	Compara, eggNOG, Homologene, OMA, OrthoDB, OrthoFinder, Panther, Phylome, RoundUp, TreeFam		Add	G2F details (CA13) DRscDB Data: (CA13) Human Protein Atlas (HPA)
37	ENSDARG00000011166	30331	ZDB-GENE-980526-39	cahz	Human	761	1374	CA3	ENSG00000164879	8	7.84	moderate	No	Yes	Compara, eggNOG, OrthoDB, OrthoFinder, Panther, Phylome, RoundUp, TreeFam		Add	G2F details (CA3) DRscDB Data: (CA3) Human Protein Atlas (HPA)
37	ENSDARG00000011166	30331	ZDB-GENE-980526-39	cahz	Human	759	1368	CA1	ENSG00000133742	8	7.82	moderate	No	Yes	Compara, eggNOG, OMA, OrthoDB, OrthoFinder, Panther, Phylome, TreeFam		Add	G2F details (CA1) DRscDB Data: (CA1) Human Protein Atlas (HPA)
37	ENSDARG00000011166	30331	ZDB-GENE-980526-39	cahz	Human	766	1381	CA7	ENSG00000168748	4	3.83	moderate	No	No	eggNOG, OrthoFinder, orthoMCL, RoundUp		Add	G2F details (CA7) DRscDB Data: (CA7) Human Protein Atlas (HPA)
39	ENSDARG00000012881	84703	ZDB-GENE-010525-1	slc4a1a	Human	6521	11027	SLC4A1	ENSG00000004939	7	7.35	moderate	Yes	No	Compara, OrthoDB, OrthoFinder, orthoMCL, Panther, Phylome, ZFIN		Add	G2F details (SLC4A1) DRscDB Data: (SLC4A1) Human Protein Atlas (HPA)
41	ENSDARG00000067995	799300	ZDB-GENE-070705-73	myhz1.2	Human	4622	7574	MYH4	ENSG00000264424	11	10.93	moderate	Yes	No	eggNOG, Hieranoid, Homologene, Inparanoid, OMA, OrthoDB, OrthoFinder, OrthoInspector, orthoMCL, Panther, TreeFam		Add	G2F details (MYH4) DRscDB Data: (MYH4) Human Protein Atlas (HPA)
41	ENSDARG00000067995	799300	ZDB-GENE-070705-73	myhz1.2	Human	4619	7567	MYH1	ENSG00000109061	10	9.93	moderate	No	No	eggNOG, Hieranoid, Inparanoid, OMA, OrthoDB, OrthoFinder, OrthoInspector, orthoMCL, Panther, TreeFam		Add	G2F details (MYH1) DRscDB Data: (MYH1) Human Protein Atlas (HPA)
41	ENSDARG00000067995	799300	ZDB-GENE-070705-73	myhz1.2	Human	4626	7578	MYH8	ENSG00000133020	10	9.93	moderate	No	Yes	eggNOG, Hieranoid, Inparanoid, OMA, OrthoDB, OrthoFinder, OrthoInspector, orthoMCL, Panther, TreeFam		Add	G2F details (MYH8) DRscDB Data: (MYH8) Human Protein Atlas (HPA)
41	ENSDARG00000067995	799300	ZDB-GENE-070705-73	myhz1.2	Human	4620	7572	MYH2	ENSG00000125414	10	9.93	moderate	No	Yes	eggNOG, Hieranoid, Inparanoid, OMA, OrthoDB, OrthoFinder, OrthoInspector, orthoMCL, Panther, TreeFam		Add	G2F details (MYH2) DRscDB Data: (MYH2) Human Protein Atlas (HPA)
41	ENSDARG00000067995	799300	ZDB-GENE-070705-73	myhz1.2	Human	8735	7571	MYH13	ENSG00000006788	6	5.88	moderate	No	Yes	OrthoDB, OrthoFinder, orthoMCL, Panther, Phylome, TreeFam		Add	G2F details (MYH13) DRscDB Data: (MYH13) Human Protein Atlas (HPA)
41	ENSDARG00000067995	799300	ZDB-GENE-070705-73	myhz1.2	Human	4621	7573	MYH3	ENSG00000109063	6	5.87	moderate	No	Yes	eggNOG, OrthoDB, OrthoFinder, orthoMCL, Panther, TreeFam		Add	G2F details (MYH3) DRscDB Data: (MYH3) Human Protein Atlas (HPA)
41	ENSDARG00000067995	799300	ZDB-GENE-070705-73	myhz1.2	Human	4625	7577	MYH7	ENSG00000092054	4	3.81	moderate	No	No	eggNOG, OrthoDB, OrthoFinder, orthoMCL		Add	G2F details (MYH7) DRscDB Data: (MYH7) Human Protein Atlas (HPA)
41	ENSDARG00000067995	799300	ZDB-GENE-070705-73	myhz1.2	Human	4627	7579	MYH9	ENSG00000100345	4	3.81	moderate	No	No	eggNOG, OrthoDB, OrthoFinder, orthoMCL		Add	G2F details (MYH9) DRscDB Data: (MYH9) Human Protein Atlas (HPA)
41	ENSDARG00000067995	799300	ZDB-GENE-070705-73	myhz1.2	Human	4628	7568	MYH10	ENSG00000133026	4	3.81	moderate	No	No	eggNOG, OrthoDB, OrthoFinder, orthoMCL		Add	G2F details (MYH10) DRscDB Data: (MYH10) Human Protein Atlas (HPA)
41	ENSDARG00000067995	799300	ZDB-GENE-070705-73	myhz1.2	Human	57644	15906	MYH7B	ENSG00000078814	4	3.81	moderate	No	No	eggNOG, OrthoDB, OrthoFinder, orthoMCL		Add	G2F details (MYH7B) DRscDB Data: (MYH7B) Human Protein Atlas (HPA)
41	ENSDARG00000067995	799300	ZDB-GENE-070705-73	myhz1.2	Human	4629	7569	MYH11	ENSG00000133392	4	3.81	moderate	No	No	eggNOG, OrthoDB, OrthoFinder, orthoMCL		Add	G2F details (MYH11) DRscDB Data: (MYH11) Human Protein Atlas (HPA)
41	ENSDARG00000067995	799300	ZDB-GENE-070705-73	myhz1.2	Human	22989	31073	MYH15	ENSG00000144821	4	3.81	moderate	No	No	eggNOG, OrthoDB, OrthoFinder, orthoMCL		Add	G2F details (MYH15) DRscDB Data: (MYH15) Human Protein Atlas (HPA)
41	ENSDARG00000067995	799300	ZDB-GENE-070705-73	myhz1.2	Human	4624	7576	MYH6	ENSG00000197616	4	3.81	moderate	No	No	eggNOG, OrthoDB, OrthoFinder, orthoMCL		Add	G2F details (MYH6) DRscDB Data: (MYH6) Human Protein Atlas (HPA)
41	ENSDARG00000067995	799300	ZDB-GENE-070705-73	myhz1.2	Human	79784	23212	MYH14	ENSG00000105357	4	3.81	moderate	No	No	eggNOG, OrthoDB, OrthoFinder, orthoMCL		Add	G2F details (MYH14) DRscDB Data: (MYH14) Human Protein Atlas (HPA)
43	ENSDARG00000000212	436656	ZDB-GENE-040718-78	krt97	Human	3872	6427	KRT17	ENSG00000128422	9	8.93	moderate	Yes	No	eggNOG, Hieranoid, Homologene, OMA, OrthoDB, OrthoFinder, OrthoInspector, Panther, Phylome		Add	G2F details (KRT17) DRscDB Data: (KRT17) Human Protein Atlas (HPA)
43	ENSDARG00000000212	436656	ZDB-GENE-040718-78	krt97	Human	3861	6416	KRT14	ENSG00000186847	8	7.93	moderate	No	Yes	eggNOG, Hieranoid, OMA, OrthoDB, OrthoFinder, OrthoInspector, Panther, Phylome		Add	G2F details (KRT14) DRscDB Data: (KRT14) Human Protein Atlas (HPA)
43	ENSDARG00000000212	436656	ZDB-GENE-040718-78	krt97	Human	3868	6423	KRT16	ENSG00000186832	8	7.93	moderate	No	Yes	eggNOG, Hieranoid, OMA, OrthoDB, OrthoFinder, OrthoInspector, Panther, Phylome		Add	G2F details (KRT16) DRscDB Data: (KRT16) Human Protein Atlas (HPA)
43	ENSDARG00000000212	436656	ZDB-GENE-040718-78	krt97	Human	3880	6436	KRT19	ENSG00000171345	8	7.93	moderate	No	Yes	eggNOG, Hieranoid, OMA, OrthoDB, OrthoFinder, OrthoInspector, Panther, Phylome		Add	G2F details (KRT19) DRscDB Data: (KRT19) Human Protein Atlas (HPA)
43	ENSDARG00000000212	436656	ZDB-GENE-040718-78	krt97	Human	3866	6421	KRT15	ENSG00000171346	7	6.93	moderate	No	No	eggNOG, Hieranoid, OMA, OrthoDB, OrthoInspector, Panther, Phylome		Add	G2F details (KRT15) DRscDB Data: (KRT15) Human Protein Atlas (HPA)
43	ENSDARG00000000212	436656	ZDB-GENE-040718-78	krt97	Human	3860	6415	KRT13	ENSG00000171401	7	6.93	moderate	No	No	eggNOG, Hieranoid, OMA, OrthoDB, OrthoInspector, Panther, Phylome		Add	G2F details (KRT13) DRscDB Data: (KRT13) Human Protein Atlas (HPA)
43	ENSDARG00000000212	436656	ZDB-GENE-040718-78	krt97	Human	192666	18527	KRT24	ENSG00000167916	5	4.92	moderate	No	No	eggNOG, Hieranoid, OrthoDB, Panther, Phylome		Add	G2F details (KRT24) DRscDB Data: (KRT24) Human Protein Atlas (HPA)
43	ENSDARG00000000212	436656	ZDB-GENE-040718-78	krt97	Human	3858	6413	KRT10	ENSG00000186395	5	4.92	moderate	No	No	eggNOG, Hieranoid, OrthoDB, Panther, Phylome		Add	G2F details (KRT10) DRscDB Data: (KRT10) Human Protein Atlas (HPA)
43	ENSDARG00000000212	436656	ZDB-GENE-040718-78	krt97	Human	3859	6414	KRT12	ENSG00000187242	5	4.92	moderate	No	No	eggNOG, Hieranoid, OrthoDB, Panther, Phylome		Add	G2F details (KRT12) DRscDB Data: (KRT12) Human Protein Atlas (HPA)
43	ENSDARG00000000212	436656	ZDB-GENE-040718-78	krt97	Human	3857	6447	KRT9	ENSG00000171403	5	4.92	moderate	No	No	eggNOG, Hieranoid, OrthoDB, Panther, Phylome		Add	G2F details (KRT9) DRscDB Data: (KRT9) Human Protein Atlas (HPA)
43	ENSDARG00000000212	436656	ZDB-GENE-040718-78	krt97	Human	54474	20412	KRT20	ENSG00000171431	5	4.88	moderate	No	Yes	eggNOG, OrthoDB, Panther, Phylome, TreeFam		Add	G2F details (KRT20) DRscDB Data: (KRT20) Human Protein Atlas (HPA)
43	ENSDARG00000000212	436656	ZDB-GENE-040718-78	krt97	Human	25984	6438	KRT23	ENSG00000108244	4	3.98	moderate	No	Yes	OrthoDB, Panther, Phylome, TreeFam		Add	G2F details (KRT23) DRscDB Data: (KRT23) Human Protein Atlas (HPA)
43	ENSDARG00000000212	436656	ZDB-GENE-040718-78	krt97	Human	8689	6454	KRT36	ENSG00000126337	4	3.92	moderate	No	Yes	eggNOG, OrthoDB, Panther, Phylome		Add	G2F details (KRT36) DRscDB Data: (KRT36) Human Protein Atlas (HPA)
43	ENSDARG00000000212	436656	ZDB-GENE-040718-78	krt97	Human	3886	6453	KRT35	ENSG00000197079	4	3.92	moderate	No	Yes	eggNOG, OrthoDB, Panther, Phylome		Add	G2F details (KRT35) DRscDB Data: (KRT35) Human Protein Atlas (HPA)
43	ENSDARG00000000212	436656	ZDB-GENE-040718-78	krt97	Human	3882	6449	KRT32	ENSG00000108759	4	3.92	moderate	No	Yes	eggNOG, OrthoDB, Panther, Phylome		Add	G2F details (KRT32) DRscDB Data: (KRT32) Human Protein Atlas (HPA)
43	ENSDARG00000000212	436656	ZDB-GENE-040718-78	krt97	Human	390792	32971	KRT39	ENSG00000196859	3	3.02	moderate	No	Yes	OrthoDB, Panther, Phylome		Add	G2F details (KRT39) DRscDB Data: (KRT39) Human Protein Atlas (HPA)
43	ENSDARG00000000212	436656	ZDB-GENE-040718-78	krt97	Human	125115	26707	KRT40	ENSG00000204889	3	3.02	moderate	No	Yes	OrthoDB, Panther, Phylome		Add	G2F details (KRT40) DRscDB Data: (KRT40) Human Protein Atlas (HPA)
43	ENSDARG00000000212	436656	ZDB-GENE-040718-78	krt97	Human	342574	30841	KRT27	ENSG00000171446	3	2.91	moderate	No	Yes	eggNOG, Panther, Phylome		Add	G2F details (KRT27) DRscDB Data: (KRT27) Human Protein Atlas (HPA)
43	ENSDARG00000000212	436656	ZDB-GENE-040718-78	krt97	Human	162605	30842	KRT28	ENSG00000173908	3	2.91	moderate	No	Yes	eggNOG, Panther, Phylome		Add	G2F details (KRT28) DRscDB Data: (KRT28) Human Protein Atlas (HPA)
43	ENSDARG00000000212	436656	ZDB-GENE-040718-78	krt97	Human	147183	30839	KRT25	ENSG00000204897	3	2.91	moderate	No	Yes	eggNOG, Panther, Phylome		Add	G2F details (KRT25) DRscDB Data: (KRT25) Human Protein Atlas (HPA)
43	ENSDARG00000000212	436656	ZDB-GENE-040718-78	krt97	Human	3883	6450	KRT33A	ENSG00000006059	2	2.01	moderate	No	Yes	Panther, Phylome		Add	G2F details (KRT33A) DRscDB Data: (KRT33A) Human Protein Atlas (HPA)
43	ENSDARG00000000212	436656	ZDB-GENE-040718-78	krt97	Human	3884	6451	KRT33B	ENSG00000131738	2	2.01	moderate	No	Yes	Panther, Phylome		Add	G2F details (KRT33B) DRscDB Data: (KRT33B) Human Protein Atlas (HPA)
43	ENSDARG00000000212	436656	ZDB-GENE-040718-78	krt97	Human	3881	6448	KRT31	ENSG00000094796	2	2.01	moderate	No	Yes	Panther, Phylome		Add	G2F details (KRT31) DRscDB Data: (KRT31) Human Protein Atlas (HPA)
43	ENSDARG00000000212	436656	ZDB-GENE-040718-78	krt97	Human	100653049		LOC100653049		2	2.01	moderate	No	Yes	Panther, Phylome		Add	G2F details (LOC100653049) DRscDB Data: (LOC100653049) Human Protein Atlas (HPA)
43	ENSDARG00000000212	436656	ZDB-GENE-040718-78	krt97	Human	353288	30840	KRT26	ENSG00000186393	2	2.01	moderate	No	Yes	Panther, Phylome		Add	G2F details (KRT26) DRscDB Data: (KRT26) Human Protein Atlas (HPA)
43	ENSDARG00000000212	436656	ZDB-GENE-040718-78	krt97	Human	3885	6452	KRT34	ENSG00000131737	2	2	moderate	No	Yes	eggNOG, Panther		Add	G2F details (KRT34) DRscDB Data: (KRT34) Human Protein Atlas (HPA)
46	ENSDARG00000057460	436681	ZDB-GENE-040718-105	crygm2d13	Human	1420	2410	CRYGC	ENSG00000163254	3	2.94	moderate	Yes	No	Compara, Panther, Phylome		Add	G2F details (CRYGC) DRscDB Data: (CRYGC) Human Protein Atlas (HPA)
46	ENSDARG00000057460	436681	ZDB-GENE-040718-105	crygm2d13	Human	1418	2408	CRYGA	ENSG00000168582	3	2.94	moderate	Yes	No	Compara, Panther, Phylome		Add	G2F details (CRYGA) DRscDB Data: (CRYGA) Human Protein Atlas (HPA)
46	ENSDARG00000057460	436681	ZDB-GENE-040718-105	crygm2d13	Human	1419	2409	CRYGB	ENSG00000182187	3	2.94	moderate	Yes	No	Compara, Panther, Phylome		Add	G2F details (CRYGB) DRscDB Data: (CRYGB) Human Protein Atlas (HPA)
46	ENSDARG00000057460	436681	ZDB-GENE-040718-105	crygm2d13	Human	1421	2411	CRYGD	ENSG00000118231	3	2.94	moderate	Yes	No	Compara, Panther, Phylome		Add	G2F details (CRYGD) DRscDB Data: (CRYGD) Human Protein Atlas (HPA)
47	ENSDARG00000036876	751696	ZDB-GENE-060825-317	zgc:153284	Human	83442	15568	SH3BGRL3	ENSG00000142669	6	6	moderate	Yes	No	eggNOG, OrthoDB, OrthoFinder, Panther, RoundUp, TreeFam		Add	G2F details (SH3BGRL3) DRscDB Data: (SH3BGRL3) Human Protein Atlas (HPA)
47	ENSDARG00000036876	751696	ZDB-GENE-060825-317	zgc:153284	Human	83699	15567	SH3BGRL2	ENSG00000198478	4	3.94	moderate	No	No	eggNOG, OrthoDB, OrthoFinder, RoundUp		Add	G2F details (SH3BGRL2) DRscDB Data: (SH3BGRL2) Human Protein Atlas (HPA)
47	ENSDARG00000036876	751696	ZDB-GENE-060825-317	zgc:153284	Human	6451	10823	SH3BGRL	ENSG00000131171	4	3.94	moderate	No	No	eggNOG, OrthoDB, OrthoFinder, RoundUp		Add	G2F details (SH3BGRL) DRscDB Data: (SH3BGRL) Human Protein Atlas (HPA)
48	ENSDARG00000088823	790908	ZDB-GENE-060918-2	crygm2d3	Human	1418	2408	CRYGA	ENSG00000168582	2	2.03	moderate	Yes	No	Compara, Panther		Add	G2F details (CRYGA) DRscDB Data: (CRYGA) Human Protein Atlas (HPA)
48	ENSDARG00000088823	790908	ZDB-GENE-060918-2	crygm2d3	Human	1419	2409	CRYGB	ENSG00000182187	2	2.03	moderate	Yes	No	Compara, Panther		Add	G2F details (CRYGB) DRscDB Data: (CRYGB) Human Protein Atlas (HPA)
48	ENSDARG00000088823	790908	ZDB-GENE-060918-2	crygm2d3	Human	1421	2411	CRYGD	ENSG00000118231	2	2.03	moderate	Yes	No	Compara, Panther		Add	G2F details (CRYGD) DRscDB Data: (CRYGD) Human Protein Atlas (HPA)
48	ENSDARG00000088823	790908	ZDB-GENE-060918-2	crygm2d3	Human	1420	2410	CRYGC	ENSG00000163254	2	2.03	moderate	Yes	No	Compara, Panther		Add	G2F details (CRYGC) DRscDB Data: (CRYGC) Human Protein Atlas (HPA)
49	ENSDARG00000020527	563392	ZDB-GENE-030131-8491	nup62l	Human	54830	25960	NUP62CL	ENSG00000198088	3	2.81	moderate	No	Yes	eggNOG, OrthoFinder, Phylome		Add	G2F details (NUP62CL) DRscDB Data: (NUP62CL) Human Protein Atlas (HPA)
50	ENSDARG00000091996	566658	ZDB-GENE-030131-12	tcnbb	Human	6947	11652	TCN1	ENSG00000134827	4	3.93	moderate	No	Yes	Compara, eggNOG, OrthoFinder, Panther		Add	G2F details (TCN1) DRscDB Data: (TCN1) Human Protein Atlas (HPA)
55	ENSDARG00000038643	64607	ZDB-GENE-001229-1	alas2	Human	211	396	ALAS1	ENSG00000023330	5	4.84	moderate	No	No	eggNOG, OrthoDB, OrthoFinder, orthoMCL, RoundUp		Add	G2F details (ALAS1) DRscDB Data: (ALAS1) Human Protein Atlas (HPA)
55	ENSDARG00000038643	64607	ZDB-GENE-001229-1	alas2	Human	23464	4188	GCAT	ENSG00000100116	4	3.84	moderate	No	No	eggNOG, OrthoDB, orthoMCL, RoundUp		Add	G2F details (GCAT) DRscDB Data: (GCAT) Human Protein Atlas (HPA)
58	ENSDARG00000012944	246275	ZDB-GENE-020604-1	myhz2	Human	4619	7567	MYH1	ENSG00000109061	10	9.93	moderate	No	No	eggNOG, Hieranoid, Inparanoid, OMA, OrthoDB, OrthoFinder, OrthoInspector, orthoMCL, Panther, TreeFam		Add	G2F details (MYH1) DRscDB Data: (MYH1) Human Protein Atlas (HPA)
58	ENSDARG00000012944	246275	ZDB-GENE-020604-1	myhz2	Human	4626	7578	MYH8	ENSG00000133020	10	9.93	moderate	No	Yes	eggNOG, Hieranoid, Inparanoid, OMA, OrthoDB, OrthoFinder, OrthoInspector, orthoMCL, Panther, TreeFam		Add	G2F details (MYH8) DRscDB Data: (MYH8) Human Protein Atlas (HPA)
58	ENSDARG00000012944	246275	ZDB-GENE-020604-1	myhz2	Human	4620	7572	MYH2	ENSG00000125414	10	9.93	moderate	No	Yes	eggNOG, Hieranoid, Inparanoid, OMA, OrthoDB, OrthoFinder, OrthoInspector, orthoMCL, Panther, TreeFam		Add	G2F details (MYH2) DRscDB Data: (MYH2) Human Protein Atlas (HPA)
58	ENSDARG00000012944	246275	ZDB-GENE-020604-1	myhz2	Human	8735	7571	MYH13	ENSG00000006788	6	5.88	moderate	No	Yes	OrthoDB, OrthoFinder, orthoMCL, Panther, Phylome, TreeFam		Add	G2F details (MYH13) DRscDB Data: (MYH13) Human Protein Atlas (HPA)
58	ENSDARG00000012944	246275	ZDB-GENE-020604-1	myhz2	Human	4621	7573	MYH3	ENSG00000109063	6	5.87	moderate	No	Yes	eggNOG, OrthoDB, OrthoFinder, orthoMCL, Panther, TreeFam		Add	G2F details (MYH3) DRscDB Data: (MYH3) Human Protein Atlas (HPA)
58	ENSDARG00000012944	246275	ZDB-GENE-020604-1	myhz2	Human	4625	7577	MYH7	ENSG00000092054	4	3.81	moderate	No	No	eggNOG, OrthoDB, OrthoFinder, orthoMCL		Add	G2F details (MYH7) DRscDB Data: (MYH7) Human Protein Atlas (HPA)
58	ENSDARG00000012944	246275	ZDB-GENE-020604-1	myhz2	Human	4627	7579	MYH9	ENSG00000100345	4	3.81	moderate	No	No	eggNOG, OrthoDB, OrthoFinder, orthoMCL		Add	G2F details (MYH9) DRscDB Data: (MYH9) Human Protein Atlas (HPA)
58	ENSDARG00000012944	246275	ZDB-GENE-020604-1	myhz2	Human	4628	7568	MYH10	ENSG00000133026	4	3.81	moderate	No	No	eggNOG, OrthoDB, OrthoFinder, orthoMCL		Add	G2F details (MYH10) DRscDB Data: (MYH10) Human Protein Atlas (HPA)
58	ENSDARG00000012944	246275	ZDB-GENE-020604-1	myhz2	Human	57644	15906	MYH7B	ENSG00000078814	4	3.81	moderate	No	No	eggNOG, OrthoDB, OrthoFinder, orthoMCL		Add	G2F details (MYH7B) DRscDB Data: (MYH7B) Human Protein Atlas (HPA)
58	ENSDARG00000012944	246275	ZDB-GENE-020604-1	myhz2	Human	4629	7569	MYH11	ENSG00000133392	4	3.81	moderate	No	No	eggNOG, OrthoDB, OrthoFinder, orthoMCL		Add	G2F details (MYH11) DRscDB Data: (MYH11) Human Protein Atlas (HPA)
58	ENSDARG00000012944	246275	ZDB-GENE-020604-1	myhz2	Human	22989	31073	MYH15	ENSG00000144821	4	3.81	moderate	No	No	eggNOG, OrthoDB, OrthoFinder, orthoMCL		Add	G2F details (MYH15) DRscDB Data: (MYH15) Human Protein Atlas (HPA)
58	ENSDARG00000012944	246275	ZDB-GENE-020604-1	myhz2	Human	4624	7576	MYH6	ENSG00000197616	4	3.81	moderate	No	No	eggNOG, OrthoDB, OrthoFinder, orthoMCL		Add	G2F details (MYH6) DRscDB Data: (MYH6) Human Protein Atlas (HPA)
58	ENSDARG00000012944	246275	ZDB-GENE-020604-1	myhz2	Human	79784	23212	MYH14	ENSG00000105357	4	3.81	moderate	No	No	eggNOG, OrthoDB, OrthoFinder, orthoMCL		Add	G2F details (MYH14) DRscDB Data: (MYH14) Human Protein Atlas (HPA)
59	ENSDARG00000074745	100333762	ZDB-GENE-130530-763	zmp:0000000760	Human	1307	2193	COL16A1	ENSG00000084636	2	1.97	moderate	Yes	No	OrthoDB, TreeFam		Add	G2F details (COL16A1) DRscDB Data: (COL16A1) Human Protein Atlas (HPA)
60	ENSDARG00000053370	406823	ZDB-GENE-040426-2900	eif3jb	Human	8669	3270	EIF3J	ENSG00000104131	11	11.22	moderate	Yes	No	Compara, eggNOG, Hieranoid, OMA, OrthoDB, OrthoFinder, orthoMCL, Panther, Phylome, TreeFam, ZFIN		Add	G2F details (EIF3J) DRscDB Data: (EIF3J) Human Protein Atlas (HPA)
61	ENSDARG00000045142	561790	ZDB-GENE-101028-1	hbae5	Human	3040	4824	HBA2	ENSG00000188536	7	6.83	moderate	No	Yes	eggNOG, Inparanoid, OMA, OrthoFinder, OrthoInspector, Phylome, TreeFam		Add	G2F details (HBA2) DRscDB Data: (HBA2) Human Protein Atlas (HPA)
61	ENSDARG00000045142	561790	ZDB-GENE-101028-1	hbae5	Human	3039	4823	HBA1	ENSG00000206172	5	4.88	moderate	No	No	eggNOG, OMA, OrthoDB, OrthoFinder, TreeFam		Add	G2F details (HBA1) DRscDB Data: (HBA1) Human Protein Atlas (HPA)
61	ENSDARG00000045142	561790	ZDB-GENE-101028-1	hbae5	Human	3049	4833	HBQ1	ENSG00000086506	5	4.71	moderate	No	Yes	Compara, eggNOG, OrthoDB, Phylome, TreeFam		Add	G2F details (HBQ1) DRscDB Data: (HBQ1) Human Protein Atlas (HPA)
61	ENSDARG00000045142	561790	ZDB-GENE-101028-1	hbae5	Human	3042	4826	HBM	ENSG00000206177	4	3.94	moderate	No	No	Compara, eggNOG, OrthoDB, Panther		Add	G2F details (HBM) DRscDB Data: (HBM) Human Protein Atlas (HPA)
65	ENSDARG00000077536	799690	ZDB-GENE-081105-64	snrnp200	Human	10973	18697	ASCC3	ENSG00000112249	4	3.81	moderate	No	No	eggNOG, OrthoDB, OrthoFinder, orthoMCL		Add	G2F details (ASCC3) DRscDB Data: (ASCC3) Human Protein Atlas (HPA)
67	ENSDARG00000024746	565155	ZDB-GENE-031001-3	hsp90aa1.2	Human	3326	5258	HSP90AB1	ENSG00000096384	5	4.84	moderate	No	No	eggNOG, OrthoDB, OrthoFinder, orthoMCL, RoundUp		Add	G2F details (HSP90AB1) DRscDB Data: (HSP90AB1) Human Protein Atlas (HPA)
67	ENSDARG00000024746	565155	ZDB-GENE-031001-3	hsp90aa1.2	Human	7184	12028	HSP90B1	ENSG00000166598	4	3.81	moderate	No	No	eggNOG, OrthoDB, OrthoFinder, orthoMCL		Add	G2F details (HSP90B1) DRscDB Data: (HSP90B1) Human Protein Atlas (HPA)
67	ENSDARG00000024746	565155	ZDB-GENE-031001-3	hsp90aa1.2	Human	3323	5255	HSP90AA4P		2	2.01	moderate	No	Yes	Panther, Phylome		Add	G2F details (HSP90AA4P) DRscDB Data: (HSP90AA4P) Human Protein Atlas (HPA)
67	ENSDARG00000024746	565155	ZDB-GENE-031001-3	hsp90aa1.2	Human	730211	32535	HSP90AA5P		2	2.01	moderate	No	Yes	Panther, Phylome		Add	G2F details (HSP90AA5P) DRscDB Data: (HSP90AA5P) Human Protein Atlas (HPA)
70	ENSDARG00000015947	497348	ZDB-GENE-050208-64	matn4	Human	4147	6908	MATN2	ENSG00000132561	9	8.99	moderate	No	Yes	eggNOG, Homologene, Inparanoid, OrthoDB, OrthoFinder, OrthoInspector, orthoMCL, Panther, RoundUp		Add	G2F details (MATN2) DRscDB Data: (MATN2) Human Protein Atlas (HPA)
71	ENSDARG00000045144	563335	ZDB-GENE-070410-131	zgc:163057	Human	3050	4835	HBZ	ENSG00000130656	5	5.02	moderate	Yes	No	eggNOG, OMA, OrthoDB, OrthoFinder, Panther		Add	G2F details (HBZ) DRscDB Data: (HBZ) Human Protein Atlas (HPA)
71	ENSDARG00000045144	563335	ZDB-GENE-070410-131	zgc:163057	Human	3039	4823	HBA1	ENSG00000206172	5	4.85	moderate	Yes	No	Compara, eggNOG, OMA, OrthoDB, OrthoFinder		Add	G2F details (HBA1) DRscDB Data: (HBA1) Human Protein Atlas (HPA)
71	ENSDARG00000045144	563335	ZDB-GENE-070410-131	zgc:163057	Human	3040	4824	HBA2	ENSG00000188536	4	3.84	moderate	No	No	Compara, eggNOG, OMA, OrthoFinder		Add	G2F details (HBA2) DRscDB Data: (HBA2) Human Protein Atlas (HPA)
74	ENSDARG00000099918	393834	ZDB-GENE-040426-1878	arl4aa	Human	10124	695	ARL4A	ENSG00000122644	11	11.27	moderate	Yes	No	Compara, eggNOG, Inparanoid, OMA, OrthoDB, OrthoFinder, orthoMCL, Panther, Phylome, TreeFam, ZFIN		Add	G2F details (ARL4A) DRscDB Data: (ARL4A) Human Protein Atlas (HPA)
74	ENSDARG00000099918	393834	ZDB-GENE-040426-1878	arl4aa	Human	10123	698	ARL4C	ENSG00000188042	4	3.81	moderate	No	No	eggNOG, OrthoDB, OrthoFinder, orthoMCL		Add	G2F details (ARL4C) DRscDB Data: (ARL4C) Human Protein Atlas (HPA)
75	ENSDARG00000103787	563236	ZDB-GENE-030131-7120	chd1	Human	1106	1917	CHD2	ENSG00000173575	5	4.84	moderate	No	No	eggNOG, OrthoDB, OrthoFinder, orthoMCL, RoundUp		Add	G2F details (CHD2) DRscDB Data: (CHD2) Human Protein Atlas (HPA)
77	ENSDARG00000003213	323672	ZDB-GENE-030131-2392	naa15a	Human	80155	30782	NAA15	ENSG00000164134	10	10.43	moderate	Yes	No	Compara, Homologene, Inparanoid, OrthoDB, OrthoFinder, orthoMCL, Panther, Phylome, RoundUp, ZFIN		Add	G2F details (NAA15) DRscDB Data: (NAA15) Human Protein Atlas (HPA)
77	ENSDARG00000003213	323672	ZDB-GENE-030131-2392	naa15a	Human	79612	26164	NAA16	ENSG00000172766	4	3.94	moderate	No	Yes	OrthoDB, OrthoFinder, orthoMCL, RoundUp		Add	G2F details (NAA16) DRscDB Data: (NAA16) Human Protein Atlas (HPA)
78	ENSDARG00000103472	436830	ZDB-GENE-040718-295	nedd8l	Human	4738	7732	NEDD8	ENSG00000129559	6	6.05	moderate	Yes	No	Compara, Homologene, OMA, OrthoDB, OrthoFinder, Panther		Add	G2F details (NEDD8) DRscDB Data: (NEDD8) Human Protein Atlas (HPA)
79	ENSDARG00000019702	369193	ZDB-GENE-030821-1	aldocb	Human	226	414	ALDOA	ENSG00000149925	4	3.83	moderate	No	No	eggNOG, OrthoFinder, orthoMCL, RoundUp		Add	G2F details (ALDOA) DRscDB Data: (ALDOA) Human Protein Atlas (HPA)
79	ENSDARG00000019702	369193	ZDB-GENE-030821-1	aldocb	Human	229	417	ALDOB	ENSG00000136872	4	3.81	moderate	No	No	eggNOG, OrthoDB, OrthoFinder, orthoMCL		Add	G2F details (ALDOB) DRscDB Data: (ALDOB) Human Protein Atlas (HPA)
80	ENSDARG00000090337	100002463	ZDB-GENE-030131-9858	pprc1	Human	10891	9237	PPARGC1A	ENSG00000109819	4	3.94	moderate	No	No	eggNOG, OrthoDB, OrthoFinder, RoundUp		Add	G2F details (PPARGC1A) DRscDB Data: (PPARGC1A) Human Protein Atlas (HPA)
83	ENSDARG00000043663	550564	ZDB-GENE-050417-416	faub	Human	101927789		LOC101927789		3	2.92	moderate	No	Yes	OrthoDB, OrthoInspector, Phylome		Add	G2F details (LOC101927789) DRscDB Data: (LOC101927789) Human Protein Atlas (HPA)
84	ENSDARG00000041878	406798	ZDB-GENE-040426-2860	rab11ba	Human	9230	9761	RAB11B	ENSG00000185236	10	10.22	moderate	Yes	No	Compara, eggNOG, OMA, OrthoDB, OrthoFinder, orthoMCL, Panther, Phylome, TreeFam, ZFIN		Add	G2F details (RAB11B) DRscDB Data: (RAB11B) Human Protein Atlas (HPA)
84	ENSDARG00000041878	406798	ZDB-GENE-040426-2860	rab11ba	Human	8766	9760	RAB11A	ENSG00000103769	5	4.82	moderate	No	No	eggNOG, OMA, OrthoDB, OrthoFinder, orthoMCL		Add	G2F details (RAB11A) DRscDB Data: (RAB11A) Human Protein Atlas (HPA)
85	ENSDARG00000102995	405801	ZDB-GENE-040628-1	rbm24a	Human	55544	15818	RBM38	ENSG00000132819	5	4.91	moderate	No	No	eggNOG, OrthoDB, OrthoFinder, orthoMCL, Panther		Add	G2F details (RBM38) DRscDB Data: (RBM38) Human Protein Atlas (HPA)
89	ENSDARG00000024295	678623	ZDB-GENE-021115-1	slc11a2	Human	6556	10907	SLC11A1	ENSG00000018280	5	4.91	moderate	No	Yes	eggNOG, OrthoDB, OrthoFinder, orthoMCL, Panther		Add	G2F details (SLC11A1) DRscDB Data: (SLC11A1) Human Protein Atlas (HPA)
92	ENSDARG00000005840	335974	ZDB-GENE-030131-7917	got2b	Human	2806	4433	GOT2	ENSG00000125166	11	11.22	moderate	Yes	No	Compara, eggNOG, Homologene, OMA, OrthoDB, OrthoFinder, orthoMCL, Panther, Phylome, TreeFam, ZFIN		Add	G2F details (GOT2) DRscDB Data: (GOT2) Human Protein Atlas (HPA)
92	ENSDARG00000005840	335974	ZDB-GENE-030131-7917	got2b	Human	2805	4432	GOT1	ENSG00000120053	4	3.81	moderate	No	No	eggNOG, OrthoDB, OrthoFinder, orthoMCL		Add	G2F details (GOT1) DRscDB Data: (GOT1) Human Protein Atlas (HPA)
94	ENSDARG00000021702	406261	ZDB-GENE-040426-1920	pdcd4a	Human	27250	8763	PDCD4	ENSG00000150593	7	7.3	moderate	Yes	No	eggNOG, OrthoDB, OrthoFinder, orthoMCL, RoundUp, TreeFam, ZFIN		Add	G2F details (PDCD4) DRscDB Data: (PDCD4) Human Protein Atlas (HPA)
95	ENSDARG00000018958	353225	ZDB-GENE-030515-7	nrarpb	Human	441478	33843	NRARP	ENSG00000198435	8	8.33	moderate	Yes	No	eggNOG, OMA, OrthoDB, OrthoFinder, orthoMCL, Panther, Phylome, ZFIN		Add	G2F details (NRARP) DRscDB Data: (NRARP) Human Protein Atlas (HPA)
97	ENSDARG00000057571	572733	ZDB-GENE-040116-6	pgam2	Human	5223	8888	PGAM1	ENSG00000171314	5	4.84	moderate	No	No	eggNOG, OrthoDB, OrthoFinder, orthoMCL, RoundUp		Add	G2F details (PGAM1) DRscDB Data: (PGAM1) Human Protein Atlas (HPA)
97	ENSDARG00000057571	572733	ZDB-GENE-040116-6	pgam2	Human	669	1093	BPGM	ENSG00000172331	4	3.81	moderate	No	No	eggNOG, OrthoDB, OrthoFinder, orthoMCL		Add	G2F details (BPGM) DRscDB Data: (BPGM) Human Protein Atlas (HPA)
99	ENSDARG00000059259	321035	ZDB-GENE-030131-9663	pabpc4	Human	140886	13629	PABPC5	ENSG00000174740	5	4.92	moderate	No	Yes	eggNOG, OrthoDB, OrthoFinder, Panther, Phylome		Add	G2F details (PABPC5) DRscDB Data: (PABPC5) Human Protein Atlas (HPA)
99	ENSDARG00000059259	321035	ZDB-GENE-030131-9663	pabpc4	Human	132430	31955	PABPC4L	ENSG00000254535	5	4.92	moderate	No	Yes	eggNOG, OrthoDB, OrthoFinder, Panther, Phylome		Add	G2F details (PABPC4L) DRscDB Data: (PABPC4L) Human Protein Atlas (HPA)
99	ENSDARG00000059259	321035	ZDB-GENE-030131-9663	pabpc4	Human	5042	8556	PABPC3	ENSG00000151846	4	3.81	moderate	No	No	eggNOG, OrthoDB, OrthoFinder, orthoMCL		Add	G2F details (PABPC3) DRscDB Data: (PABPC3) Human Protein Atlas (HPA)
99	ENSDARG00000059259	321035	ZDB-GENE-030131-9663	pabpc4	Human	80336	15797	PABPC1L	ENSG00000101104	4	3.81	moderate	No	No	eggNOG, OrthoDB, OrthoFinder, orthoMCL		Add	G2F details (PABPC1L) DRscDB Data: (PABPC1L) Human Protein Atlas (HPA)
99	ENSDARG00000059259	321035	ZDB-GENE-030131-9663	pabpc4	Human	26986	8554	PABPC1	ENSG00000070756	4	3.81	moderate	No	No	eggNOG, OrthoDB, OrthoFinder, orthoMCL		Add	G2F details (PABPC1) DRscDB Data: (PABPC1) Human Protein Atlas (HPA)
100	ENSDARG00000002970	326668	ZDB-GENE-030131-4867	ss18	Human	51188	15593	SS18L2	ENSG00000008324	5	5.04	moderate	No	No	eggNOG, OrthoDB, OrthoFinder, Panther, RoundUp		Add	G2F details (SS18L2) DRscDB Data: (SS18L2) Human Protein Atlas (HPA)
100	ENSDARG00000002970	326668	ZDB-GENE-030131-4867	ss18	Human	26039	15592	SS18L1	ENSG00000184402	4	3.82	moderate	No	Yes	eggNOG, OrthoDB, OrthoFinder, Phylome		Add	G2F details (SS18L1) DRscDB Data: (SS18L1) Human Protein Atlas (HPA)
101	ENSDARG00000009315	556495	ZDB-GENE-060929-708	clgn	Human	821	1473	CANX	ENSG00000127022	4	3.81	moderate	No	No	eggNOG, OrthoDB, OrthoFinder, orthoMCL		Add	G2F details (CANX) DRscDB Data: (CANX) Human Protein Atlas (HPA)
105	ENSDARG00000054929	541538	ZDB-GENE-050327-77	zgc:110540	Human	1633	2704	DCK	ENSG00000156136	5	4.77	moderate	Yes	No	eggNOG, OrthoDB, OrthoFinder, orthoMCL, TreeFam		Add	G2F details (DCK) DRscDB Data: (DCK) Human Protein Atlas (HPA)
106	ENSDARG00000117089	415200	ZDB-GENE-040625-102	zgc:86839	Human	1164	2000	CKS2	ENSG00000123975	4	3.85	moderate	Yes	No	Compara, OrthoDB, OrthoFinder, Phylome		Add	G2F details (CKS2) DRscDB Data: (CKS2) Human Protein Atlas (HPA)
107	ENSDARG00000037109	266990	ZDB-GENE-021031-3	pwp2h	Human	102724159		LOC102724159	ENSG00000275464	7	6.86	moderate	No	Yes	Compara, eggNOG, OMA, OrthoDB, OrthoFinder, Panther, Phylome		Add	G2F details (LOC102724159) DRscDB Data: (LOC102724159) Human Protein Atlas (HPA)
110	ENSDARG00000060687	569795	ZDB-GENE-050419-256	chd2	Human	1105	1915	CHD1	ENSG00000153922	4	3.94	moderate	No	No	eggNOG, OrthoDB, OrthoFinder, RoundUp		Add	G2F details (CHD1) DRscDB Data: (CHD1) Human Protein Atlas (HPA)
110	ENSDARG00000060687	569795	ZDB-GENE-050419-256	chd2	Human	100507217	48626	LINC01578		2	1.94	moderate	No	Yes	Compara, OMA		(1) Show Add	G2F details (LINC01578) DRscDB Data: (LINC01578) Human Protein Atlas (HPA)
111	ENSDARG00000042045	553572	ZDB-GENE-030131-4258	hmg20b	Human	10363	5001	HMG20A	ENSG00000140382	4	3.94	moderate	No	No	eggNOG, OrthoDB, OrthoFinder, RoundUp		Add	G2F details (HMG20A) DRscDB Data: (HMG20A) Human Protein Atlas (HPA)
116	ENSDARG00000010717	393757	ZDB-GENE-040426-1753	chchd10	Human	51142	21645	CHCHD2	ENSG00000106153	5	4.84	moderate	No	No	eggNOG, OrthoDB, OrthoFinder, orthoMCL, RoundUp		Add	G2F details (CHCHD2) DRscDB Data: (CHCHD2) Human Protein Atlas (HPA)
117	ENSDARG00000012892	393553	ZDB-GENE-040426-1533	ammecr1	Human	83607	28658	AMMECR1L	ENSG00000144233	7	6.9	moderate	No	Yes	eggNOG, OrthoDB, OrthoFinder, orthoMCL, Panther, RoundUp, TreeFam		Add	G2F details (AMMECR1L) DRscDB Data: (AMMECR1L) Human Protein Atlas (HPA)
120	ENSDARG00000099339	393964	ZDB-GENE-040426-984	pacsin3	Human	11252	8571	PACSIN2	ENSG00000100266	4	3.94	moderate	No	No	eggNOG, OrthoDB, OrthoFinder, RoundUp		Add	G2F details (PACSIN2) DRscDB Data: (PACSIN2) Human Protein Atlas (HPA)
120	ENSDARG00000099339	393964	ZDB-GENE-040426-984	pacsin3	Human	29993	8570	PACSIN1	ENSG00000124507	4	3.94	moderate	No	No	eggNOG, OrthoDB, OrthoFinder, RoundUp		Add	G2F details (PACSIN1) DRscDB Data: (PACSIN1) Human Protein Atlas (HPA)
124	ENSDARG00000069817	436854	ZDB-GENE-040718-321	crygm2d8	Human	1420	2410	CRYGC	ENSG00000163254	2	2.03	moderate	Yes	No	Compara, Panther		Add	G2F details (CRYGC) DRscDB Data: (CRYGC) Human Protein Atlas (HPA)
124	ENSDARG00000069817	436854	ZDB-GENE-040718-321	crygm2d8	Human	1418	2408	CRYGA	ENSG00000168582	2	2.03	moderate	Yes	No	Compara, Panther		Add	G2F details (CRYGA) DRscDB Data: (CRYGA) Human Protein Atlas (HPA)
124	ENSDARG00000069817	436854	ZDB-GENE-040718-321	crygm2d8	Human	1419	2409	CRYGB	ENSG00000182187	2	2.03	moderate	Yes	No	Compara, Panther		Add	G2F details (CRYGB) DRscDB Data: (CRYGB) Human Protein Atlas (HPA)
124	ENSDARG00000069817	436854	ZDB-GENE-040718-321	crygm2d8	Human	1421	2411	CRYGD	ENSG00000118231	2	2.03	moderate	Yes	No	Compara, Panther		Add	G2F details (CRYGD) DRscDB Data: (CRYGD) Human Protein Atlas (HPA)
125	ENSDARG00000103409	406350	ZDB-GENE-040426-2039	uhrf1	Human	115426	12557	UHRF2	ENSG00000147854	3	2.82	moderate	No	Yes	OrthoDB, orthoMCL, Phylome		Add	G2F details (UHRF2) DRscDB Data: (UHRF2) Human Protein Atlas (HPA)
132	ENSDARG00000008840	394129	ZDB-GENE-040426-1375	hmbsa	Human	3145	4982	HMBS	ENSG00000256269	12	12.21	moderate	Yes	No	Compara, eggNOG, Hieranoid, Homologene, OrthoDB, OrthoFinder, OrthoInspector, orthoMCL, Panther, Phylome, TreeFam, ZFIN		Add	G2F details (HMBS) DRscDB Data: (HMBS) Human Protein Atlas (HPA)
134	ENSDARG00000036721	405895	ZDB-GENE-040426-2319	tomm40l	Human	10452	18001	TOMM40	ENSG00000130204	13	12.8	moderate	Yes	No	Compara, eggNOG, Hieranoid, Inparanoid, OMA, OrthoDB, OrthoFinder, OrthoInspector, orthoMCL, Panther, Phylome, RoundUp, TreeFam		Add	G2F details (TOMM40) DRscDB Data: (TOMM40) Human Protein Atlas (HPA)
134	ENSDARG00000036721	405895	ZDB-GENE-040426-2319	tomm40l	Human	84134	25756	TOMM40L	ENSG00000158882	4	3.81	moderate	No	Yes	eggNOG, OrthoDB, OrthoFinder, orthoMCL		Add	G2F details (TOMM40L) DRscDB Data: (TOMM40L) Human Protein Atlas (HPA)
138	ENSDARG00000033614	327572	ZDB-GENE-030131-5783	rasgef1ba	Human	255426	27400	RASGEF1C	ENSG00000146090	4	3.81	moderate	No	Yes	eggNOG, OrthoDB, OrthoFinder, orthoMCL		Add	G2F details (RASGEF1C) DRscDB Data: (RASGEF1C) Human Protein Atlas (HPA)
138	ENSDARG00000033614	327572	ZDB-GENE-030131-5783	rasgef1ba	Human	221002	24246	RASGEF1A	ENSG00000198915	3	2.91	moderate	No	Yes	eggNOG, OrthoDB, OrthoFinder		Add	G2F details (RASGEF1A) DRscDB Data: (RASGEF1A) Human Protein Atlas (HPA)
140	ENSDARG00000042934	321449	ZDB-GENE-030131-102	ccn2a	Human	4856	7885	CCN3	ENSG00000136999	4	3.94	moderate	No	Yes	eggNOG, OrthoDB, OrthoFinder, RoundUp		Add	G2F details (CCN3) DRscDB Data: (CCN3) Human Protein Atlas (HPA)
143	ENSDARG00000038473	321832	ZDB-GENE-030131-551	ube2d3	Human	7322	12475	UBE2D2	ENSG00000131508	6	6	moderate	No	No	eggNOG, OrthoDB, OrthoFinder, Panther, RoundUp, TreeFam		Add	G2F details (UBE2D2) DRscDB Data: (UBE2D2) Human Protein Atlas (HPA)
143	ENSDARG00000038473	321832	ZDB-GENE-030131-551	ube2d3	Human	51619	21647	UBE2D4	ENSG00000078967	4	3.94	moderate	No	No	eggNOG, OrthoDB, OrthoFinder, RoundUp		Add	G2F details (UBE2D4) DRscDB Data: (UBE2D4) Human Protein Atlas (HPA)
143	ENSDARG00000038473	321832	ZDB-GENE-030131-551	ube2d3	Human	7321	12474	UBE2D1	ENSG00000072401	4	3.94	moderate	No	No	eggNOG, OrthoDB, OrthoFinder, RoundUp		Add	G2F details (UBE2D1) DRscDB Data: (UBE2D1) Human Protein Atlas (HPA)
147	ENSDARG00000061735	555643	ZDB-GENE-030131-6898	hnrnpm	Human	50804	17940	MYEF2	ENSG00000104177	4	3.94	moderate	No	No	eggNOG, OrthoDB, OrthoFinder, RoundUp		Add	G2F details (MYEF2) DRscDB Data: (MYEF2) Human Protein Atlas (HPA)
148	ENSDARG00000019765	100038767	ZDB-GENE-070424-15	zgc:158803	Human	55692	6723	LUC7L	ENSG00000007392	6	5.84	moderate	No	No	eggNOG, OrthoDB, OrthoFinder, OrthoInspector, orthoMCL, RoundUp		Add	G2F details (LUC7L) DRscDB Data: (LUC7L) Human Protein Atlas (HPA)
148	ENSDARG00000019765	100038767	ZDB-GENE-070424-15	zgc:158803	Human	51747	24309	LUC7L3	ENSG00000108848	4	3.84	moderate	No	No	eggNOG, OrthoDB, orthoMCL, RoundUp		Add	G2F details (LUC7L3) DRscDB Data: (LUC7L3) Human Protein Atlas (HPA)
148	ENSDARG00000019765	100038767	ZDB-GENE-070424-15	zgc:158803	Human	100996928	44671	FMC1-LUC7L2	ENSG00000269955	4	3.84	moderate	No	No	Compara, eggNOG, OrthoDB, OrthoFinder		Add	G2F details (FMC1-LUC7L2) DRscDB Data: (FMC1-LUC7L2) Human Protein Atlas (HPA)
152	ENSDARG00000070560	337155	ZDB-GENE-030131-9099	nap1l4a	Human	4676	7640	NAP1L4	ENSG00000205531	9	9.29	moderate	Yes	No	eggNOG, OMA, OrthoDB, OrthoFinder, orthoMCL, Panther, Phylome, TreeFam, ZFIN		Add	G2F details (NAP1L4) DRscDB Data: (NAP1L4) Human Protein Atlas (HPA)
152	ENSDARG00000070560	337155	ZDB-GENE-030131-9099	nap1l4a	Human	4674	7638	NAP1L2	ENSG00000186462	4	3.84	moderate	No	No	Compara, eggNOG, OrthoDB, OrthoFinder		Add	G2F details (NAP1L2) DRscDB Data: (NAP1L2) Human Protein Atlas (HPA)
152	ENSDARG00000070560	337155	ZDB-GENE-030131-9099	nap1l4a	Human	4673	7637	NAP1L1	ENSG00000187109	4	3.81	moderate	No	No	eggNOG, OrthoDB, OrthoFinder, orthoMCL		Add	G2F details (NAP1L1) DRscDB Data: (NAP1L1) Human Protein Atlas (HPA)
152	ENSDARG00000070560	337155	ZDB-GENE-030131-9099	nap1l4a	Human	266812	19968	NAP1L5	ENSG00000177432	3	2.93	moderate	No	Yes	Compara, eggNOG, Panther		Add	G2F details (NAP1L5) DRscDB Data: (NAP1L5) Human Protein Atlas (HPA)
155	ENSDARG00000112087	415162	ZDB-GENE-030131-2977	ube2l3a	Human	7332	12488	UBE2L3	ENSG00000185651	10	10.22	moderate	Yes	No	Compara, eggNOG, OMA, OrthoDB, OrthoFinder, orthoMCL, Panther, Phylome, TreeFam, ZFIN		Add	G2F details (UBE2L3) DRscDB Data: (UBE2L3) Human Protein Atlas (HPA)
155	ENSDARG00000112087	415162	ZDB-GENE-030131-2977	ube2l3a	Human	171222	13477	UBE2L5	ENSG00000236444	5	5.05	moderate	No	No	Compara, OMA, OrthoDB, OrthoFinder, Panther		Add	G2F details (UBE2L5) DRscDB Data: (UBE2L5) Human Protein Atlas (HPA)
155	ENSDARG00000112087	415162	ZDB-GENE-030131-2977	ube2l3a	Human	9246	12490	UBE2L6	ENSG00000156587	3	3.01	moderate	No	Yes	eggNOG, OrthoDB, Panther		Add	G2F details (UBE2L6) DRscDB Data: (UBE2L6) Human Protein Atlas (HPA)
166	ENSDARG00000038737	445482	ZDB-GENE-040822-33	phf20b	Human	51105	24280	PHF20L1	ENSG00000129292	5	4.85	moderate	No	No	eggNOG, OrthoDB, OrthoFinder, Phylome, RoundUp		Add	G2F details (PHF20L1) DRscDB Data: (PHF20L1) Human Protein Atlas (HPA)
171	ENSDARG00000037402	436860	ZDB-GENE-040718-327	lim2.3	Human	3982	6610	LIM2	ENSG00000105370	6	6.47	moderate	Yes	No	eggNOG, OrthoDB, OrthoFinder, Panther, TreeFam, ZFIN		Add	G2F details (LIM2) DRscDB Data: (LIM2) Human Protein Atlas (HPA)
171	ENSDARG00000037402	436860	ZDB-GENE-040718-327	lim2.3	Human	125875	28511	CLDND2	ENSG00000160318	2	2.1	moderate	No	Yes	OrthoFinder, Panther		Add	G2F details (CLDND2) DRscDB Data: (CLDND2) Human Protein Atlas (HPA)
174	ENSDARG00000016363	323656	ZDB-GENE-030131-2376	her8a	Human	55502	18254	HES6	ENSG00000144485	2	1.91	moderate	Yes	No	eggNOG, OrthoDB		Add	G2F details (HES6) DRscDB Data: (HES6) Human Protein Atlas (HPA)
174	ENSDARG00000016363	323656	ZDB-GENE-030131-2376	her8a	Human	57801	24149	HES4	ENSG00000188290	2	1.9	moderate	Yes	No	eggNOG, OrthoFinder		Add	G2F details (HES4) DRscDB Data: (HES4) Human Protein Atlas (HPA)
174	ENSDARG00000016363	323656	ZDB-GENE-030131-2376	her8a	Human	3280	5192	HES1	ENSG00000114315	2	1.9	moderate	Yes	No	eggNOG, OrthoFinder		Add	G2F details (HES1) DRscDB Data: (HES1) Human Protein Atlas (HPA)
174	ENSDARG00000016363	323656	ZDB-GENE-030131-2376	her8a	Human	54626	16005	HES2	ENSG00000069812	2	1.9	moderate	Yes	No	eggNOG, OrthoFinder		Add	G2F details (HES2) DRscDB Data: (HES2) Human Protein Atlas (HPA)
175	ENSDARG00000068567	30269	ZDB-GENE-980526-166	shha	Human	50846	2865	DHH	ENSG00000139549	5	4.91	moderate	No	No	eggNOG, OrthoDB, OrthoFinder, orthoMCL, Panther		Add	G2F details (DHH) DRscDB Data: (DHH) Human Protein Atlas (HPA)
175	ENSDARG00000068567	30269	ZDB-GENE-980526-166	shha	Human	3549	5956	IHH	ENSG00000163501	5	4.91	moderate	No	No	eggNOG, OrthoDB, OrthoFinder, orthoMCL, Panther		Add	G2F details (IHH) DRscDB Data: (IHH) Human Protein Atlas (HPA)
178	ENSDARG00000091655	541329	ZDB-GENE-050320-18	gcsha	Human	2653	4208	GCSH	ENSG00000140905	10	10.29	moderate	Yes	No	eggNOG, Homologene, OMA, OrthoDB, OrthoFinder, orthoMCL, Panther, Phylome, TreeFam, ZFIN		Add	G2F details (GCSH) DRscDB Data: (GCSH) Human Protein Atlas (HPA)
181	ENSDARG00000068177	266749	ZDB-GENE-021011-2	pak2a	Human	5058	8590	PAK1	ENSG00000149269	5	4.84	moderate	No	No	eggNOG, OrthoDB, OrthoFinder, orthoMCL, RoundUp		Add	G2F details (PAK1) DRscDB Data: (PAK1) Human Protein Atlas (HPA)
181	ENSDARG00000068177	266749	ZDB-GENE-021011-2	pak2a	Human	5063	8592	PAK3	ENSG00000077264	5	4.84	moderate	No	Yes	eggNOG, OrthoDB, OrthoFinder, orthoMCL, RoundUp		Add	G2F details (PAK3) DRscDB Data: (PAK3) Human Protein Atlas (HPA)
183	ENSDARG00000031560	791187	ZDB-GENE-070112-2292	srpk1b	Human	26576	11402	SRPK3	ENSG00000184343	4	3.81	moderate	No	No	eggNOG, OrthoDB, OrthoFinder, orthoMCL		Add	G2F details (SRPK3) DRscDB Data: (SRPK3) Human Protein Atlas (HPA)
183	ENSDARG00000031560	791187	ZDB-GENE-070112-2292	srpk1b	Human	6733	11306	SRPK2	ENSG00000135250	4	3.81	moderate	No	No	eggNOG, OrthoDB, OrthoFinder, orthoMCL		Add	G2F details (SRPK2) DRscDB Data: (SRPK2) Human Protein Atlas (HPA)
185	ENSDARG00000006003	405873	ZDB-GENE-040426-2439	mycla	Human	4610	7555	MYCL	ENSG00000116990	10	10.32	moderate	Yes	No	Compara, eggNOG, Hieranoid, OMA, OrthoDB, OrthoInspector, Panther, Phylome, TreeFam, ZFIN		Add	G2F details (MYCL) DRscDB Data: (MYCL) Human Protein Atlas (HPA)
186	ENSDARG00000013150	336645	ZDB-GENE-030131-8589	dhx16	Human	1659	2749	DHX8	ENSG00000067596	4	3.81	moderate	No	No	eggNOG, OrthoDB, OrthoFinder, orthoMCL		Add	G2F details (DHX8) DRscDB Data: (DHX8) Human Protein Atlas (HPA)
186	ENSDARG00000013150	336645	ZDB-GENE-030131-8589	dhx16	Human	1665	2738	DHX15	ENSG00000109606	4	3.81	moderate	No	No	eggNOG, OrthoDB, OrthoFinder, orthoMCL		Add	G2F details (DHX15) DRscDB Data: (DHX15) Human Protein Atlas (HPA)
186	ENSDARG00000013150	336645	ZDB-GENE-030131-8589	dhx16	Human	9785	17211	DHX38	ENSG00000140829	4	3.81	moderate	No	No	eggNOG, OrthoDB, OrthoFinder, orthoMCL		Add	G2F details (DHX38) DRscDB Data: (DHX38) Human Protein Atlas (HPA)
186	ENSDARG00000013150	336645	ZDB-GENE-030131-8589	dhx16	Human	165545	20410	DQX1	ENSG00000144045	3	2.91	moderate	No	Yes	eggNOG, OrthoDB, OrthoFinder		Add	G2F details (DQX1) DRscDB Data: (DQX1) Human Protein Atlas (HPA)
187	ENSDARG00000061547	767650	ZDB-GENE-060929-224	zgc:153409	Human	8366	4789	HIST1H4B	ENSG00000278705	4	3.84	moderate	No	Yes	Compara, OMA, OrthoFinder, orthoMCL		Add	G2F details (HIST1H4B) DRscDB Data: (HIST1H4B) Human Protein Atlas (HPA)
187	ENSDARG00000061547	767650	ZDB-GENE-060929-224	zgc:153409	Human	8369	4792	HIST1H4G	ENSG00000275663	4	3.82	moderate	No	Yes	eggNOG, OMA, OrthoFinder, Phylome		Add	G2F details (HIST1H4G) DRscDB Data: (HIST1H4G) Human Protein Atlas (HPA)
187	ENSDARG00000061547	767650	ZDB-GENE-060929-224	zgc:153409	Human	8370	4794	HIST2H4A	ENSG00000270882	4	3.81	moderate	No	Yes	eggNOG, OMA, OrthoFinder, orthoMCL		Add	G2F details (HIST2H4A) DRscDB Data: (HIST2H4A) Human Protein Atlas (HPA)
187	ENSDARG00000061547	767650	ZDB-GENE-060929-224	zgc:153409	Human	8367	4790	HIST1H4E	ENSG00000276966	4	3.81	moderate	No	Yes	eggNOG, OMA, OrthoFinder, orthoMCL		Add	G2F details (HIST1H4E) DRscDB Data: (HIST1H4E) Human Protein Atlas (HPA)
187	ENSDARG00000061547	767650	ZDB-GENE-060929-224	zgc:153409	Human	8359	4781	HIST1H4A	ENSG00000278637	4	3.81	moderate	No	Yes	eggNOG, OMA, OrthoFinder, orthoMCL		Add	G2F details (HIST1H4A) DRscDB Data: (HIST1H4A) Human Protein Atlas (HPA)
187	ENSDARG00000061547	767650	ZDB-GENE-060929-224	zgc:153409	Human	8363	4785	HIST1H4J	ENSG00000197238	4	3.81	moderate	No	Yes	eggNOG, OMA, OrthoFinder, orthoMCL		Add	G2F details (HIST1H4J) DRscDB Data: (HIST1H4J) Human Protein Atlas (HPA)
187	ENSDARG00000061547	767650	ZDB-GENE-060929-224	zgc:153409	Human	8368	4791	HIST1H4L	ENSG00000275126	4	3.81	moderate	No	Yes	eggNOG, OMA, OrthoFinder, orthoMCL		Add	G2F details (HIST1H4L) DRscDB Data: (HIST1H4L) Human Protein Atlas (HPA)
187	ENSDARG00000061547	767650	ZDB-GENE-060929-224	zgc:153409	Human	8360	4782	HIST1H4D	ENSG00000277157	4	3.81	moderate	No	No	eggNOG, OMA, OrthoFinder, orthoMCL		Add	G2F details (HIST1H4D) DRscDB Data: (HIST1H4D) Human Protein Atlas (HPA)
187	ENSDARG00000061547	767650	ZDB-GENE-060929-224	zgc:153409	Human	8365	4788	HIST1H4H	ENSG00000158406	4	3.81	moderate	No	Yes	eggNOG, OMA, OrthoFinder, orthoMCL		Add	G2F details (HIST1H4H) DRscDB Data: (HIST1H4H) Human Protein Atlas (HPA)
187	ENSDARG00000061547	767650	ZDB-GENE-060929-224	zgc:153409	Human	121504	20510	HIST4H4	ENSG00000197837	4	3.81	moderate	No	No	eggNOG, OMA, OrthoFinder, orthoMCL		Add	G2F details (HIST4H4) DRscDB Data: (HIST4H4) Human Protein Atlas (HPA)
187	ENSDARG00000061547	767650	ZDB-GENE-060929-224	zgc:153409	Human	8294	4793	HIST1H4I	ENSG00000276180	4	3.81	moderate	No	No	eggNOG, OMA, OrthoFinder, orthoMCL		Add	G2F details (HIST1H4I) DRscDB Data: (HIST1H4I) Human Protein Atlas (HPA)
187	ENSDARG00000061547	767650	ZDB-GENE-060929-224	zgc:153409	Human	8361	4783	HIST1H4F	ENSG00000274618	4	3.81	moderate	No	Yes	eggNOG, OMA, OrthoFinder, orthoMCL		Add	G2F details (HIST1H4F) DRscDB Data: (HIST1H4F) Human Protein Atlas (HPA)
187	ENSDARG00000061547	767650	ZDB-GENE-060929-224	zgc:153409	Human	8362	4784	HIST1H4K	ENSG00000273542	4	3.81	moderate	No	Yes	eggNOG, OMA, OrthoFinder, orthoMCL		Add	G2F details (HIST1H4K) DRscDB Data: (HIST1H4K) Human Protein Atlas (HPA)
187	ENSDARG00000061547	767650	ZDB-GENE-060929-224	zgc:153409	Human	8364	4787	HIST1H4C	ENSG00000197061	4	3.81	moderate	No	Yes	eggNOG, OMA, OrthoFinder, orthoMCL		Add	G2F details (HIST1H4C) DRscDB Data: (HIST1H4C) Human Protein Atlas (HPA)
188	ENSDARG00000059483	100006454	ZDB-GENE-091013-5	tead1b	Human	8463	11715	TEAD2	ENSG00000074219	6	5.94	moderate	No	Yes	eggNOG, OrthoDB, OrthoFinder, orthoMCL, Panther, RoundUp		Add	G2F details (TEAD2) DRscDB Data: (TEAD2) Human Protein Atlas (HPA)
188	ENSDARG00000059483	100006454	ZDB-GENE-091013-5	tead1b	Human	7005	11716	TEAD3	ENSG00000007866	5	4.84	moderate	No	No	eggNOG, OrthoDB, OrthoFinder, orthoMCL, RoundUp		Add	G2F details (TEAD3) DRscDB Data: (TEAD3) Human Protein Atlas (HPA)
188	ENSDARG00000059483	100006454	ZDB-GENE-091013-5	tead1b	Human	7004	11717	TEAD4	ENSG00000197905	5	4.84	moderate	No	Yes	eggNOG, OrthoDB, OrthoFinder, orthoMCL, RoundUp		Add	G2F details (TEAD4) DRscDB Data: (TEAD4) Human Protein Atlas (HPA)
191	ENSDARG00000001890	323918	ZDB-GENE-030131-2638	stt3b	Human	3703	6172	STT3A	ENSG00000134910	4	3.94	moderate	No	No	eggNOG, OrthoDB, OrthoFinder, RoundUp		Add	G2F details (STT3A) DRscDB Data: (STT3A) Human Protein Atlas (HPA)
194	ENSDARG00000051748	799608	ZDB-GENE-070424-30	ccnd2a	Human	896	1585	CCND3	ENSG00000112576	5	4.91	moderate	No	No	eggNOG, OrthoDB, OrthoFinder, orthoMCL, Panther		Add	G2F details (CCND3) DRscDB Data: (CCND3) Human Protein Atlas (HPA)
195	ENSDARG00000008370	322106	ZDB-GENE-030131-825	csnk1da	Human	1453	2452	CSNK1D	ENSG00000141551	9	9.28	moderate	Yes	No	Compara, eggNOG, OrthoDB, OrthoFinder, orthoMCL, Panther, Phylome, RoundUp, ZFIN		Add	G2F details (CSNK1D) DRscDB Data: (CSNK1D) Human Protein Atlas (HPA)
195	ENSDARG00000008370	322106	ZDB-GENE-030131-825	csnk1da	Human	1452	2451	CSNK1A1	ENSG00000113712	5	4.84	moderate	No	No	eggNOG, OrthoDB, OrthoFinder, orthoMCL, RoundUp		Add	G2F details (CSNK1A1) DRscDB Data: (CSNK1A1) Human Protein Atlas (HPA)
195	ENSDARG00000008370	322106	ZDB-GENE-030131-825	csnk1da	Human	102800317	53829	TPTEP2-CSNK1E	ENSG00000283900	4	4.05	moderate	No	No	OMA, OrthoDB, OrthoFinder, RoundUp		Add	G2F details (TPTEP2-CSNK1E) DRscDB Data: (TPTEP2-CSNK1E) Human Protein Atlas (HPA)
195	ENSDARG00000008370	322106	ZDB-GENE-030131-825	csnk1da	Human	1454	2453	CSNK1E	ENSG00000213923	4	3.81	moderate	No	No	eggNOG, OMA, OrthoFinder, orthoMCL		Add	G2F details (CSNK1E) DRscDB Data: (CSNK1E) Human Protein Atlas (HPA)
196	ENSDARG00000012341	445107	ZDB-GENE-010724-2	capn9	Human	825	1480	CAPN3	ENSG00000092529	4	3.81	moderate	No	No	eggNOG, OrthoDB, OrthoFinder, orthoMCL		Add	G2F details (CAPN3) DRscDB Data: (CAPN3) Human Protein Atlas (HPA)
196	ENSDARG00000012341	445107	ZDB-GENE-010724-2	capn9	Human	824	1479	CAPN2	ENSG00000162909	4	3.81	moderate	No	No	eggNOG, OrthoDB, OrthoFinder, orthoMCL		Add	G2F details (CAPN2) DRscDB Data: (CAPN2) Human Protein Atlas (HPA)
196	ENSDARG00000012341	445107	ZDB-GENE-010724-2	capn9	Human	11131	1478	CAPN11	ENSG00000137225	4	3.81	moderate	No	No	eggNOG, OrthoDB, OrthoFinder, orthoMCL		Add	G2F details (CAPN11) DRscDB Data: (CAPN11) Human Protein Atlas (HPA)
196	ENSDARG00000012341	445107	ZDB-GENE-010724-2	capn9	Human	823	1476	CAPN1	ENSG00000014216	4	3.81	moderate	No	No	eggNOG, OrthoDB, OrthoFinder, orthoMCL		Add	G2F details (CAPN1) DRscDB Data: (CAPN1) Human Protein Atlas (HPA)
198	ENSDARG00000003098	415256	ZDB-GENE-030424-1	kdm5bb	Human	5927	9886	KDM5A	ENSG00000073614	5	4.84	moderate	No	No	eggNOG, OrthoDB, OrthoFinder, orthoMCL, RoundUp		Add	G2F details (KDM5A) DRscDB Data: (KDM5A) Human Protein Atlas (HPA)
198	ENSDARG00000003098	415256	ZDB-GENE-030424-1	kdm5bb	Human	8242	11114	KDM5C	ENSG00000126012	5	4.84	moderate	No	No	eggNOG, OrthoDB, OrthoFinder, orthoMCL, RoundUp		Add	G2F details (KDM5C) DRscDB Data: (KDM5C) Human Protein Atlas (HPA)
200	ENSDARG00000058206	321177	ZDB-GENE-030131-9744	si:ch211-153b23.5	Human	8209	1273	GATD3A	ENSG00000160221	3	2.81	moderate	Yes	No	eggNOG, OrthoDB, orthoMCL		Add	G2F details (GATD3A) DRscDB Data: (GATD3A) Human Protein Atlas (HPA)
201	ENSDARG00000044153	100003223	ZDB-GENE-030616-609	ppp1cb	Human	5499	9281	PPP1CA	ENSG00000172531	4	3.81	moderate	No	No	eggNOG, OrthoDB, OrthoFinder, orthoMCL		Add	G2F details (PPP1CA) DRscDB Data: (PPP1CA) Human Protein Atlas (HPA)
201	ENSDARG00000044153	100003223	ZDB-GENE-030616-609	ppp1cb	Human	5501	9283	PPP1CC	ENSG00000186298	4	3.81	moderate	No	No	eggNOG, OrthoDB, OrthoFinder, orthoMCL		Add	G2F details (PPP1CC) DRscDB Data: (PPP1CC) Human Protein Atlas (HPA)
207	ENSDARG00000071445	436720	ZDB-GENE-040718-146	myoz1b	Human	58529	13752	MYOZ1	ENSG00000177791	11	11.46	moderate	Yes	No	Compara, eggNOG, Homologene, Inparanoid, OMA, OrthoDB, OrthoFinder, OrthoInspector, Panther, TreeFam, ZFIN		Add	G2F details (MYOZ1) DRscDB Data: (MYOZ1) Human Protein Atlas (HPA)
211	ENSDARG00000017841	406806	ZDB-GENE-040426-2872	cand1	Human	23066	30689	CAND2	ENSG00000144712	5	4.84	moderate	No	No	eggNOG, OrthoDB, OrthoFinder, orthoMCL, RoundUp		Add	G2F details (CAND2) DRscDB Data: (CAND2) Human Protein Atlas (HPA)
212	ENSDARG00000010316	394188	ZDB-GENE-040426-1011	qars	Human	102465536	49990	MIR6890	ENSG00000284488	2	1.94	moderate	No	Yes	Compara, OMA		(1) Show Add	G2F details (MIR6890) DRscDB Data: (MIR6890) Human Protein Atlas (HPA)
219	ENSDARG00000011000	323974	ZDB-GENE-030131-2694	gtf2a1	Human	11036	30727	GTF2A1L	ENSG00000242441	4	3.94	moderate	No	No	eggNOG, OrthoDB, OrthoFinder, RoundUp		Add	G2F details (GTF2A1L) DRscDB Data: (GTF2A1L) Human Protein Atlas (HPA)
222	ENSDARG00000003081	321053	ZDB-GENE-030131-9794	mybphb	Human	4608	7552	MYBPH	ENSG00000133055	9	9.22	moderate	Yes	No	Compara, eggNOG, Homologene, OMA, OrthoDB, OrthoFinder, Phylome, TreeFam, ZFIN		Add	G2F details (MYBPH) DRscDB Data: (MYBPH) Human Protein Atlas (HPA)
222	ENSDARG00000003081	321053	ZDB-GENE-030131-9794	mybphb	Human	343263	30434	MYBPHL	ENSG00000221986	7	6.89	moderate	No	Yes	eggNOG, OMA, OrthoDB, OrthoFinder, Panther, Phylome, TreeFam		Add	G2F details (MYBPHL) DRscDB Data: (MYBPHL) Human Protein Atlas (HPA)
224	ENSDARG00000013734	449786	ZDB-GENE-041010-32	polr3glb	Human	10622	30075	POLR3G	ENSG00000113356	4	3.81	moderate	No	No	eggNOG, OrthoDB, OrthoFinder, orthoMCL		Add	G2F details (POLR3G) DRscDB Data: (POLR3G) Human Protein Atlas (HPA)
226	ENSDARG00000052893	30474	ZDB-GENE-990415-238	rx3	Human	84839	18286	RAX2	ENSG00000173976	2	2.11	moderate	No	Yes	OrthoDB, Panther		Add	G2F details (RAX2) DRscDB Data: (RAX2) Human Protein Atlas (HPA)
230	ENSDARG00000058115	352940	ZDB-GENE-030323-1	fgfr2	Human	2264	3691	FGFR4	ENSG00000160867	4	3.94	moderate	No	No	OrthoDB, OrthoFinder, orthoMCL, RoundUp		Add	G2F details (FGFR4) DRscDB Data: (FGFR4) Human Protein Atlas (HPA)
230	ENSDARG00000058115	352940	ZDB-GENE-030323-1	fgfr2	Human	2261	3690	FGFR3	ENSG00000068078	4	3.94	moderate	No	No	OrthoDB, OrthoFinder, orthoMCL, RoundUp		Add	G2F details (FGFR3) DRscDB Data: (FGFR3) Human Protein Atlas (HPA)
230	ENSDARG00000058115	352940	ZDB-GENE-030323-1	fgfr2	Human	2260	3688	FGFR1	ENSG00000077782	4	3.94	moderate	No	No	OrthoDB, OrthoFinder, orthoMCL, RoundUp		Add	G2F details (FGFR1) DRscDB Data: (FGFR1) Human Protein Atlas (HPA)
231	ENSDARG00000014517	406618	ZDB-GENE-040426-2584	usp5	Human	8975	12611	USP13	ENSG00000058056	5	4.84	moderate	No	No	eggNOG, OrthoDB, OrthoFinder, orthoMCL, RoundUp		Add	G2F details (USP13) DRscDB Data: (USP13) Human Protein Atlas (HPA)
234	ENSDARG00000044751	415237	ZDB-GENE-040625-160	ddt	Human	100037417	33446	DDTL	ENSG00000099974	8	7.82	moderate	No	Yes	Compara, eggNOG, OMA, OrthoDB, OrthoFinder, Panther, Phylome, TreeFam		Add	G2F details (DDTL) DRscDB Data: (DDTL) Human Protein Atlas (HPA)
234	ENSDARG00000044751	415237	ZDB-GENE-040625-160	ddt	Human	391322		LOC391322		2	2.01	moderate	No	Yes	OrthoDB, OrthoFinder		Add	G2F details (LOC391322) DRscDB Data: (LOC391322) Human Protein Atlas (HPA)
236	ENSDARG00000022232	317739	ZDB-GENE-030114-4	ppan	Human	692312	33526	PPAN-P2RY11	ENSG00000243207	6	5.88	moderate	No	Yes	eggNOG, OMA, OrthoFinder, Panther, Phylome, TreeFam		Add	G2F details (PPAN-P2RY11) DRscDB Data: (PPAN-P2RY11) Human Protein Atlas (HPA)
239	ENSDARG00000020890	30441	ZDB-GENE-991019-9	tmod4	Human	7111	11871	TMOD1	ENSG00000136842	4	3.94	moderate	No	No	eggNOG, OrthoDB, OrthoFinder, RoundUp		Add	G2F details (TMOD1) DRscDB Data: (TMOD1) Human Protein Atlas (HPA)
239	ENSDARG00000020890	30441	ZDB-GENE-991019-9	tmod4	Human	29767	11872	TMOD2	ENSG00000128872	4	3.94	moderate	No	No	eggNOG, OrthoDB, OrthoFinder, RoundUp		Add	G2F details (TMOD2) DRscDB Data: (TMOD2) Human Protein Atlas (HPA)
239	ENSDARG00000020890	30441	ZDB-GENE-991019-9	tmod4	Human	29766	11873	TMOD3	ENSG00000138594	4	3.94	moderate	No	No	eggNOG, OrthoDB, OrthoFinder, RoundUp		Add	G2F details (TMOD3) DRscDB Data: (TMOD3) Human Protein Atlas (HPA)
240	ENSDARG00000003469	266958	ZDB-GENE-030730-1	neurod4	Human	63974	13804	NEUROD6	ENSG00000164600	4	3.94	moderate	No	No	eggNOG, OrthoDB, OrthoFinder, RoundUp		Add	G2F details (NEUROD6) DRscDB Data: (NEUROD6) Human Protein Atlas (HPA)
240	ENSDARG00000003469	266958	ZDB-GENE-030730-1	neurod4	Human	4760	7762	NEUROD1	ENSG00000162992	4	3.94	moderate	No	No	eggNOG, OrthoDB, OrthoFinder, RoundUp		Add	G2F details (NEUROD1) DRscDB Data: (NEUROD1) Human Protein Atlas (HPA)
241	ENSDARG00000044760	323509	ZDB-GENE-030131-2229	gnaia	Human	2770	4384	GNAI1	ENSG00000127955	6	5.77	moderate	Yes	No	eggNOG, OrthoFinder, orthoMCL, Panther, Phylome, TreeFam		Add	G2F details (GNAI1) DRscDB Data: (GNAI1) Human Protein Atlas (HPA)
241	ENSDARG00000044760	323509	ZDB-GENE-030131-2229	gnaia	Human	2773	4387	GNAI3	ENSG00000065135	5	4.91	moderate	No	No	eggNOG, OrthoDB, OrthoFinder, orthoMCL, Panther		Add	G2F details (GNAI3) DRscDB Data: (GNAI3) Human Protein Atlas (HPA)
241	ENSDARG00000044760	323509	ZDB-GENE-030131-2229	gnaia	Human	2780	4394	GNAT2	ENSG00000134183	4	3.81	moderate	No	No	eggNOG, OrthoDB, OrthoFinder, orthoMCL		Add	G2F details (GNAT2) DRscDB Data: (GNAT2) Human Protein Atlas (HPA)
241	ENSDARG00000044760	323509	ZDB-GENE-030131-2229	gnaia	Human	2775	4389	GNAO1	ENSG00000087258	4	3.81	moderate	No	No	eggNOG, OrthoDB, OrthoFinder, orthoMCL		Add	G2F details (GNAO1) DRscDB Data: (GNAO1) Human Protein Atlas (HPA)
241	ENSDARG00000044760	323509	ZDB-GENE-030131-2229	gnaia	Human	346562	22800	GNAT3	ENSG00000214415	4	3.81	moderate	No	No	eggNOG, OrthoDB, OrthoFinder, orthoMCL		Add	G2F details (GNAT3) DRscDB Data: (GNAT3) Human Protein Atlas (HPA)
241	ENSDARG00000044760	323509	ZDB-GENE-030131-2229	gnaia	Human	2771	4385	GNAI2	ENSG00000114353	4	3.81	moderate	No	No	eggNOG, OrthoDB, OrthoFinder, orthoMCL		Add	G2F details (GNAI2) DRscDB Data: (GNAI2) Human Protein Atlas (HPA)
247	ENSDARG00000075625	560325	ZDB-GENE-031113-23	lrig1	Human	121227	30991	LRIG3	ENSG00000139263	5	4.84	moderate	No	No	eggNOG, OrthoDB, OrthoFinder, orthoMCL, RoundUp		Add	G2F details (LRIG3) DRscDB Data: (LRIG3) Human Protein Atlas (HPA)
247	ENSDARG00000075625	560325	ZDB-GENE-031113-23	lrig1	Human	9860	20889	LRIG2	ENSG00000198799	5	4.84	moderate	No	No	eggNOG, OrthoDB, OrthoFinder, orthoMCL, RoundUp		Add	G2F details (LRIG2) DRscDB Data: (LRIG2) Human Protein Atlas (HPA)
252	ENSDARG00000093052	798694		LOC798694	Human	729	1339	C6	ENSG00000039537	6	5.71	moderate	Yes	No	Compara, eggNOG, OMA, OrthoFinder, Phylome, TreeFam		Add	G2F details (C6) DRscDB Data: (C6) Human Protein Atlas (HPA)
256	ENSDARG00000005254	373129	ZDB-GENE-030826-32	kdelr2a	Human	10945	6304	KDELR1	ENSG00000105438	6	5.94	moderate	No	Yes	eggNOG, OrthoDB, OrthoFinder, orthoMCL, Panther, RoundUp		Add	G2F details (KDELR1) DRscDB Data: (KDELR1) Human Protein Atlas (HPA)
257	ENSDARG00000035324	394074	ZDB-GENE-040426-710	hnrnpl	Human	92906	25127	HNRNPLL	ENSG00000143889	4	4.01	moderate	No	Yes	eggNOG, OrthoDB, OrthoFinder, Panther		Add	G2F details (HNRNPLL) DRscDB Data: (HNRNPLL) Human Protein Atlas (HPA)
258	ENSDARG00000076572	566558	ZDB-GENE-060918-5	crygm2d7	Human	1418	2408	CRYGA	ENSG00000168582	3	2.94	moderate	Yes	No	Compara, Panther, Phylome		Add	G2F details (CRYGA) DRscDB Data: (CRYGA) Human Protein Atlas (HPA)
258	ENSDARG00000076572	566558	ZDB-GENE-060918-5	crygm2d7	Human	1419	2409	CRYGB	ENSG00000182187	3	2.94	moderate	Yes	No	Compara, Panther, Phylome		Add	G2F details (CRYGB) DRscDB Data: (CRYGB) Human Protein Atlas (HPA)
258	ENSDARG00000076572	566558	ZDB-GENE-060918-5	crygm2d7	Human	1421	2411	CRYGD	ENSG00000118231	3	2.94	moderate	Yes	No	Compara, Panther, Phylome		Add	G2F details (CRYGD) DRscDB Data: (CRYGD) Human Protein Atlas (HPA)
258	ENSDARG00000076572	566558	ZDB-GENE-060918-5	crygm2d7	Human	1420	2410	CRYGC	ENSG00000163254	3	2.94	moderate	Yes	No	Compara, Panther, Phylome		Add	G2F details (CRYGC) DRscDB Data: (CRYGC) Human Protein Atlas (HPA)
259	ENSDARG00000102056	562786	ZDB-GENE-081104-483	svild	Human	6840	11480	SVIL	ENSG00000197321	6	6.47	moderate	Yes	No	eggNOG, OrthoDB, OrthoFinder, Panther, TreeFam, ZFIN		Add	G2F details (SVIL) DRscDB Data: (SVIL) Human Protein Atlas (HPA)
260	ENSDARG00000053862	335789	ZDB-GENE-030131-7732	crygmx	Human	1420	2410	CRYGC	ENSG00000163254	5	4.94	moderate	Yes	No	Compara, eggNOG, OrthoDB, OrthoFinder, Panther		Add	G2F details (CRYGC) DRscDB Data: (CRYGC) Human Protein Atlas (HPA)
260	ENSDARG00000053862	335789	ZDB-GENE-030131-7732	crygmx	Human	1419	2409	CRYGB	ENSG00000182187	5	4.94	moderate	Yes	No	Compara, eggNOG, OrthoDB, OrthoFinder, Panther		Add	G2F details (CRYGB) DRscDB Data: (CRYGB) Human Protein Atlas (HPA)
260	ENSDARG00000053862	335789	ZDB-GENE-030131-7732	crygmx	Human	1421	2411	CRYGD	ENSG00000118231	5	4.94	moderate	Yes	No	Compara, eggNOG, OrthoDB, OrthoFinder, Panther		Add	G2F details (CRYGD) DRscDB Data: (CRYGD) Human Protein Atlas (HPA)
260	ENSDARG00000053862	335789	ZDB-GENE-030131-7732	crygmx	Human	1418	2408	CRYGA	ENSG00000168582	4	4.01	moderate	No	No	eggNOG, Homologene, OrthoDB, Panther		Add	G2F details (CRYGA) DRscDB Data: (CRYGA) Human Protein Atlas (HPA)
265	ENSDARG00000006251	322997	ZDB-GENE-030131-1717	ell2	Human	8178	23114	ELL	ENSG00000105656	4	3.94	moderate	No	No	eggNOG, OrthoDB, OrthoFinder, RoundUp		Add	G2F details (ELL) DRscDB Data: (ELL) Human Protein Atlas (HPA)
271	ENSDARG00000031216	393701	ZDB-GENE-040426-1689	ssu72	Human	136157	43627	SSU72P8	ENSG00000230268	2	2.01	moderate	No	Yes	Panther, Phylome		Add	G2F details (SSU72P8) DRscDB Data: (SSU72P8) Human Protein Atlas (HPA)
271	ENSDARG00000031216	393701	ZDB-GENE-040426-1689	ssu72	Human	390031	43621	SSU72P2	ENSG00000284306	2	2.01	moderate	No	Yes	Panther, Phylome		Add	G2F details (SSU72P2) DRscDB Data: (SSU72P2) Human Protein Atlas (HPA)
271	ENSDARG00000031216	393701	ZDB-GENE-040426-1689	ssu72	Human	143506	43622	SSU72P3	ENSG00000284546	2	2.01	moderate	No	Yes	Panther, Phylome		Add	G2F details (SSU72P3) DRscDB Data: (SSU72P3) Human Protein Atlas (HPA)
273	ENSDARG00000024829	30234	ZDB-GENE-990415-262	tnn	Human	7143	11953	TNR	ENSG00000116147	4	3.91	moderate	No	No	eggNOG, OrthoDB, orthoMCL, Panther		Add	G2F details (TNR) DRscDB Data: (TNR) Human Protein Atlas (HPA)
280	ENSDARG00000042796	322397	ZDB-GENE-030131-1117	yy1a	Human	404281	31684	YY2	ENSG00000230797	6	5.87	moderate	No	Yes	eggNOG, OrthoDB, OrthoFinder, orthoMCL, Panther, TreeFam		Add	G2F details (YY2) DRscDB Data: (YY2) Human Protein Atlas (HPA)
280	ENSDARG00000042796	322397	ZDB-GENE-030131-1117	yy1a	Human	132625	30949	ZFP42	ENSG00000179059	3	3.07	moderate	No	Yes	OrthoDB, Panther, TreeFam		Add	G2F details (ZFP42) DRscDB Data: (ZFP42) Human Protein Atlas (HPA)
283	ENSDARG00000007387	325410	ZDB-GENE-030131-4135	irf2a	Human	3660	6117	IRF2	ENSG00000168310	6	6.4	moderate	Yes	No	Compara, eggNOG, OrthoDB, Panther, TreeFam, ZFIN		Add	G2F details (IRF2) DRscDB Data: (IRF2) Human Protein Atlas (HPA)
284	ENSDARG00000008131	562710	ZDB-GENE-060322-5	sox1b	Human	6656	11189	SOX1	ENSG00000182968	13	13.34	moderate	Yes	No	eggNOG, Hieranoid, Homologene, Inparanoid, OMA, OrthoDB, OrthoFinder, OrthoInspector, orthoMCL, Panther, Phylome, TreeFam, ZFIN		Add	G2F details (SOX1) DRscDB Data: (SOX1) Human Protein Atlas (HPA)
284	ENSDARG00000008131	562710	ZDB-GENE-060322-5	sox1b	Human	6657	11195	SOX2	ENSG00000181449	4	3.81	moderate	No	No	eggNOG, OrthoDB, OrthoFinder, orthoMCL		Add	G2F details (SOX2) DRscDB Data: (SOX2) Human Protein Atlas (HPA)
286	ENSDARG00000052816	394021	ZDB-GENE-040426-1558	shmt1	Human	6472	10852	SHMT2	ENSG00000182199	5	4.84	moderate	No	No	eggNOG, OrthoDB, OrthoFinder, orthoMCL, RoundUp		Add	G2F details (SHMT2) DRscDB Data: (SHMT2) Human Protein Atlas (HPA)
286	ENSDARG00000052816	394021	ZDB-GENE-040426-1558	shmt1	Human	102466733	50183	MIR6778	ENSG00000283772	2	1.94	moderate	No	Yes	Compara, OMA		(1) Show Add	G2F details (MIR6778) DRscDB Data: (MIR6778) Human Protein Atlas (HPA)
289	ENSDARG00000101277	100001293	ZDB-GENE-030131-7377	znf207b	Human	693217	32888	MIR632	ENSG00000283774	2	1.94	moderate	No	Yes	Compara, OMA		(1) Show Add	G2F details (MIR632) DRscDB Data: (MIR632) Human Protein Atlas (HPA)
291	ENSDARG00000019223	406834	ZDB-GENE-040426-2914	arglu1a	Human	55082	25482	ARGLU1	ENSG00000134884	9	9.32	moderate	Yes	No	Compara, eggNOG, OrthoFinder, OrthoInspector, orthoMCL, Panther, RoundUp, TreeFam, ZFIN		Add	G2F details (ARGLU1) DRscDB Data: (ARGLU1) Human Protein Atlas (HPA)
293	ENSDARG00000018146	352926	ZDB-GENE-030410-1	gpx1a	Human	2877	4554	GPX2	ENSG00000176153	6	5.68	moderate	No	Yes	eggNOG, OrthoDB, OrthoFinder, orthoMCL, Phylome, TreeFam		Add	G2F details (GPX2) DRscDB Data: (GPX2) Human Protein Atlas (HPA)
295	ENSDARG00000010745	324164	ZDB-GENE-030131-2884	dnaja2b	Human	10294	14884	DNAJA2	ENSG00000069345	9	9.21	moderate	Yes	No	Compara, eggNOG, OrthoDB, OrthoFinder, orthoMCL, Panther, Phylome, TreeFam, ZFIN		Add	G2F details (DNAJA2) DRscDB Data: (DNAJA2) Human Protein Atlas (HPA)
295	ENSDARG00000010745	324164	ZDB-GENE-030131-2884	dnaja2b	Human	55466	14885	DNAJA4	ENSG00000140403	4	3.81	moderate	No	No	eggNOG, OrthoDB, OrthoFinder, orthoMCL		Add	G2F details (DNAJA4) DRscDB Data: (DNAJA4) Human Protein Atlas (HPA)
295	ENSDARG00000010745	324164	ZDB-GENE-030131-2884	dnaja2b	Human	3301	5229	DNAJA1	ENSG00000086061	4	3.81	moderate	No	No	eggNOG, OrthoDB, OrthoFinder, orthoMCL		Add	G2F details (DNAJA1) DRscDB Data: (DNAJA1) Human Protein Atlas (HPA)
299	ENSDARG00000069118	373878	ZDB-GENE-030904-6	ppp2r5eb	Human	5527	9311	PPP2R5C	ENSG00000078304	5	4.84	moderate	No	No	eggNOG, OrthoDB, OrthoFinder, orthoMCL, RoundUp		Add	G2F details (PPP2R5C) DRscDB Data: (PPP2R5C) Human Protein Atlas (HPA)
299	ENSDARG00000069118	373878	ZDB-GENE-030904-6	ppp2r5eb	Human	5526	9310	PPP2R5B	ENSG00000068971	5	4.84	moderate	No	No	eggNOG, OrthoDB, OrthoFinder, orthoMCL, RoundUp		Add	G2F details (PPP2R5B) DRscDB Data: (PPP2R5B) Human Protein Atlas (HPA)
299	ENSDARG00000069118	373878	ZDB-GENE-030904-6	ppp2r5eb	Human	5525	9309	PPP2R5A	ENSG00000066027	5	4.84	moderate	No	No	eggNOG, OrthoDB, OrthoFinder, orthoMCL, RoundUp		Add	G2F details (PPP2R5A) DRscDB Data: (PPP2R5A) Human Protein Atlas (HPA)
299	ENSDARG00000069118	373878	ZDB-GENE-030904-6	ppp2r5eb	Human	5528	9312	PPP2R5D	ENSG00000112640	4	3.81	moderate	No	No	eggNOG, OrthoDB, OrthoFinder, orthoMCL		Add	G2F details (PPP2R5D) DRscDB Data: (PPP2R5D) Human Protein Atlas (HPA)
306	ENSDARG00000006621	692285	ZDB-GENE-030131-9530	pspc1	Human	4841	7871	NONO	ENSG00000147140	4	3.94	moderate	No	No	eggNOG, OrthoDB, OrthoFinder, RoundUp		Add	G2F details (NONO) DRscDB Data: (NONO) Human Protein Atlas (HPA)
306	ENSDARG00000006621	692285	ZDB-GENE-030131-9530	pspc1	Human	6421	10774	SFPQ	ENSG00000116560	4	3.94	moderate	No	No	eggNOG, OrthoDB, OrthoFinder, RoundUp		Add	G2F details (SFPQ) DRscDB Data: (SFPQ) Human Protein Atlas (HPA)
308	ENSDARG00000017014	503763	ZDB-GENE-050306-44	ywhae2	Human	7531	12851	YWHAE	ENSG00000108953	12	12.24	moderate	Yes	No	Compara, eggNOG, Hieranoid, Homologene, OrthoDB, OrthoFinder, orthoMCL, Panther, Phylome, RoundUp, TreeFam, ZFIN		Add	G2F details (YWHAE) DRscDB Data: (YWHAE) Human Protein Atlas (HPA)
308	ENSDARG00000017014	503763	ZDB-GENE-050306-44	ywhae2	Human	7534	12855	YWHAZ	ENSG00000164924	5	4.84	moderate	No	No	eggNOG, OrthoDB, OrthoFinder, orthoMCL, RoundUp		Add	G2F details (YWHAZ) DRscDB Data: (YWHAZ) Human Protein Atlas (HPA)
308	ENSDARG00000017014	503763	ZDB-GENE-050306-44	ywhae2	Human	7529	12849	YWHAB	ENSG00000166913	5	4.84	moderate	No	No	eggNOG, OrthoDB, OrthoFinder, orthoMCL, RoundUp		Add	G2F details (YWHAB) DRscDB Data: (YWHAB) Human Protein Atlas (HPA)
310	ENSDARG00000055635	445234	ZDB-GENE-040801-148	crk	Human	1399	2363	CRKL	ENSG00000099942	5	4.84	moderate	No	No	eggNOG, OrthoDB, OrthoFinder, orthoMCL, RoundUp		Add	G2F details (CRKL) DRscDB Data: (CRKL) Human Protein Atlas (HPA)
313	ENSDARG00000058725	550435	ZDB-GENE-050417-254	rfesd	Human	317671	29587	RFESD	ENSG00000175449	7	7.2	moderate	Yes	No	Compara, eggNOG, orthoMCL, Panther, Phylome, TreeFam, ZFIN		Add	G2F details (RFESD) DRscDB Data: (RFESD) Human Protein Atlas (HPA)
315	ENSDARG00000014522	541393	ZDB-GENE-050320-92	cdh6	Human	1007	1768	CDH9	ENSG00000113100	9	8.83	moderate	No	Yes	eggNOG, Inparanoid, OrthoDB, OrthoFinder, OrthoInspector, orthoMCL, Panther, Phylome, TreeFam		Add	G2F details (CDH9) DRscDB Data: (CDH9) Human Protein Atlas (HPA)
315	ENSDARG00000014522	541393	ZDB-GENE-050320-92	cdh6	Human	1008	1749	CDH10	ENSG00000040731	8	7.78	moderate	No	No	eggNOG, OrthoDB, OrthoFinder, OrthoInspector, orthoMCL, Panther, Phylome, TreeFam		Add	G2F details (CDH10) DRscDB Data: (CDH10) Human Protein Atlas (HPA)
317	ENSDARG00000099371	246090	ZDB-GENE-020513-1	cygb1	Human	114757	16505	CYGB	ENSG00000161544	7	7.39	moderate	Yes	No	Compara, eggNOG, Hieranoid, OrthoFinder, Panther, TreeFam, ZFIN		Add	G2F details (CYGB) DRscDB Data: (CYGB) Human Protein Atlas (HPA)
319	ENSDARG00000012684	378746	ZDB-GENE-030925-29	atp2b1a	Human	492	816	ATP2B3	ENSG00000067842	5	4.84	moderate	No	No	eggNOG, OrthoDB, OrthoFinder, orthoMCL, RoundUp		Add	G2F details (ATP2B3) DRscDB Data: (ATP2B3) Human Protein Atlas (HPA)
319	ENSDARG00000012684	378746	ZDB-GENE-030925-29	atp2b1a	Human	491	815	ATP2B2	ENSG00000157087	5	4.84	moderate	No	No	eggNOG, OrthoDB, OrthoFinder, orthoMCL, RoundUp		Add	G2F details (ATP2B2) DRscDB Data: (ATP2B2) Human Protein Atlas (HPA)
319	ENSDARG00000012684	378746	ZDB-GENE-030925-29	atp2b1a	Human	493	817	ATP2B4	ENSG00000058668	5	4.84	moderate	No	Yes	eggNOG, OrthoDB, OrthoFinder, orthoMCL, RoundUp		Add	G2F details (ATP2B4) DRscDB Data: (ATP2B4) Human Protein Atlas (HPA)
321	ENSDARG00000005315	58137	ZDB-GENE-000501-1	celf1	Human	10659	2550	CELF2	ENSG00000048740	6	5.94	moderate	No	No	eggNOG, OrthoDB, OrthoFinder, orthoMCL, Panther, RoundUp		Add	G2F details (CELF2) DRscDB Data: (CELF2) Human Protein Atlas (HPA)
321	ENSDARG00000005315	58137	ZDB-GENE-000501-1	celf1	Human	60677	14059	CELF6	ENSG00000140488	4	3.84	moderate	No	Yes	eggNOG, OrthoDB, orthoMCL, RoundUp		Add	G2F details (CELF6) DRscDB Data: (CELF6) Human Protein Atlas (HPA)
327	ENSDARG00000103893	323700	ZDB-GENE-030131-2420	srsf2b	Human	6427	10783	SRSF2	ENSG00000161547	11	11.32	moderate	Yes	No	eggNOG, OMA, OrthoDB, OrthoFinder, OrthoInspector, orthoMCL, Panther, Phylome, RoundUp, TreeFam, ZFIN		Add	G2F details (SRSF2) DRscDB Data: (SRSF2) Human Protein Atlas (HPA)
327	ENSDARG00000103893	323700	ZDB-GENE-030131-2420	srsf2b	Human	10929	16988	SRSF8	ENSG00000263465	6	5.84	moderate	No	Yes	Compara, eggNOG, OrthoDB, OrthoFinder, orthoMCL, Panther		Add	G2F details (SRSF8) DRscDB Data: (SRSF8) Human Protein Atlas (HPA)
327	ENSDARG00000103893	323700	ZDB-GENE-030131-2420	srsf2b	Human	693221	32892	MIR636	ENSG00000283805	2	1.94	moderate	No	Yes	Compara, OMA		(1) Show Add	G2F details (MIR636) DRscDB Data: (MIR636) Human Protein Atlas (HPA)
328	ENSDARG00000015966	692296	ZDB-GENE-041210-115	yaf2	Human	23429	10480	RYBP	ENSG00000163602	4	3.94	moderate	No	No	eggNOG, OrthoDB, OrthoFinder, RoundUp		Add	G2F details (RYBP) DRscDB Data: (RYBP) Human Protein Atlas (HPA)
329	ENSDARG00000012519	565206	ZDB-GENE-030131-2411	hcfc1b	Human	29915	24972	HCFC2	ENSG00000111727	6	5.75	moderate	No	No	eggNOG, OrthoDB, OrthoFinder, orthoMCL, Phylome, RoundUp		Add	G2F details (HCFC2) DRscDB Data: (HCFC2) Human Protein Atlas (HPA)
332	ENSDARG00000076780	110437777	ZDB-GENE-070410-109	acadsb	Human	36	91	ACADSB	ENSG00000196177	5	5.62	moderate	Yes	No	OMA, OrthoDB, OrthoFinder, Panther, ZFIN		Add	G2F details (ACADSB) DRscDB Data: (ACADSB) Human Protein Atlas (HPA)
333	ENSDARG00000007257	393945	ZDB-GENE-040122-3	rab5ab	Human	5869	9784	RAB5B	ENSG00000111540	5	4.84	moderate	No	No	eggNOG, OrthoDB, OrthoFinder, orthoMCL, RoundUp		Add	G2F details (RAB5B) DRscDB Data: (RAB5B) Human Protein Atlas (HPA)
333	ENSDARG00000007257	393945	ZDB-GENE-040122-3	rab5ab	Human	5878	9785	RAB5C	ENSG00000108774	5	4.84	moderate	No	No	eggNOG, OrthoDB, OrthoFinder, orthoMCL, RoundUp		Add	G2F details (RAB5C) DRscDB Data: (RAB5C) Human Protein Atlas (HPA)
333	ENSDARG00000007257	393945	ZDB-GENE-040122-3	rab5ab	Human	57403	9764	RAB22A	ENSG00000124209	4	3.81	moderate	No	No	eggNOG, OrthoDB, OrthoFinder, orthoMCL		Add	G2F details (RAB22A) DRscDB Data: (RAB22A) Human Protein Atlas (HPA)
333	ENSDARG00000007257	393945	ZDB-GENE-040122-3	rab5ab	Human	64284	16523	RAB17	ENSG00000124839	3	2.91	moderate	No	Yes	eggNOG, OrthoDB, OrthoFinder		Add	G2F details (RAB17) DRscDB Data: (RAB17) Human Protein Atlas (HPA)
334	ENSDARG00000051986	406413	ZDB-GENE-040426-2153	ndufs8a	Human	102465669	49947	MIR7113	ENSG00000284293	2	1.94	moderate	No	Yes	Compara, OMA		(1) Show Add	G2F details (MIR7113) DRscDB Data: (MIR7113) Human Protein Atlas (HPA)
335	ENSDARG00000097615	793004	ZDB-GENE-131127-97	si:ch211-108d22.2	Human	197358	29889	NLRC3	ENSG00000167984	2	2	moderate	Yes	No	eggNOG, Panther		Add	G2F details (NLRC3) DRscDB Data: (NLRC3) Human Protein Atlas (HPA)
336	ENSDARG00000022165	431762	ZDB-GENE-040704-59	mgst1.2	Human	4257	7061	MGST1	ENSG00000008394	14	14.27	moderate	Yes	No	Compara, eggNOG, Hieranoid, Homologene, Inparanoid, OMA, OrthoDB, OrthoFinder, OrthoInspector, orthoMCL, Panther, Phylome, TreeFam, ZFIN		Add	G2F details (MGST1) DRscDB Data: (MGST1) Human Protein Atlas (HPA)
339	ENSDARG00000014333	368632	ZDB-GENE-030616-529	ormdl1	Human	29095	16037	ORMDL2	ENSG00000123353	5	4.84	moderate	No	No	eggNOG, OrthoDB, OrthoFinder, orthoMCL, RoundUp		Add	G2F details (ORMDL2) DRscDB Data: (ORMDL2) Human Protein Atlas (HPA)
339	ENSDARG00000014333	368632	ZDB-GENE-030616-529	ormdl1	Human	94103	16038	ORMDL3	ENSG00000172057	5	4.84	moderate	No	No	eggNOG, OrthoDB, OrthoFinder, orthoMCL, RoundUp		Add	G2F details (ORMDL3) DRscDB Data: (ORMDL3) Human Protein Atlas (HPA)
344	ENSDARG00000017843	393565	ZDB-GENE-040426-1467	srsf1b	Human	8683	10791	SRSF9	ENSG00000111786	4	3.94	moderate	No	No	eggNOG, OrthoDB, OrthoFinder, RoundUp		Add	G2F details (SRSF9) DRscDB Data: (SRSF9) Human Protein Atlas (HPA)
345	ENSDARG00000045297	324421	ZDB-GENE-030131-3141	phb2a	Human	11331	30306	PHB2	ENSG00000215021	12	12.47	moderate	Yes	No	Compara, Hieranoid, Homologene, Inparanoid, OMA, OrthoDB, OrthoFinder, OrthoInspector, Panther, Phylome, TreeFam, ZFIN		Add	G2F details (PHB2) DRscDB Data: (PHB2) Human Protein Atlas (HPA)
348	ENSDARG00000022399	405834	ZDB-GENE-040426-2055	ntmt1	Human	149281	31932	METTL11B	ENSG00000203740	4	3.81	moderate	No	No	eggNOG, OrthoDB, OrthoFinder, orthoMCL		Add	G2F details (METTL11B) DRscDB Data: (METTL11B) Human Protein Atlas (HPA)
350	ENSDARG00000010137	30579	ZDB-GENE-990415-138	ldb1a	Human	9079	6533	LDB2	ENSG00000169744	5	4.84	moderate	No	No	eggNOG, OrthoDB, OrthoFinder, orthoMCL, RoundUp		Add	G2F details (LDB2) DRscDB Data: (LDB2) Human Protein Atlas (HPA)
351	ENSDARG00000002194	554272	ZDB-GENE-051213-1	rhd	Human	6006	10008	RHCE	ENSG00000188672	7	6.81	moderate	No	Yes	Compara, eggNOG, OrthoDB, OrthoFinder, Panther, Phylome, TreeFam		Add	G2F details (RHCE) DRscDB Data: (RHCE) Human Protein Atlas (HPA)
351	ENSDARG00000002194	554272	ZDB-GENE-051213-1	rhd	Human	57127	14572	RHBG	ENSG00000132677	4	4.01	moderate	No	No	eggNOG, OrthoDB, OrthoFinder, Panther		Add	G2F details (RHBG) DRscDB Data: (RHBG) Human Protein Atlas (HPA)
354	ENSDARG00000071018	794088	ZDB-GENE-030131-3776	ptena	Human	5728	9588	PTEN	ENSG00000171862	8	8.46	moderate	Yes	No	OMA, OrthoDB, OrthoFinder, orthoMCL, Panther, Phylome, RoundUp, ZFIN		Add	G2F details (PTEN) DRscDB Data: (PTEN) Human Protein Atlas (HPA)
356	ENSDARG00000017105	550487	ZDB-GENE-030131-7118	vaspb	Human	51466	20234	EVL	ENSG00000196405	4	3.94	moderate	No	No	eggNOG, OrthoDB, OrthoFinder, RoundUp		Add	G2F details (EVL) DRscDB Data: (EVL) Human Protein Atlas (HPA)
357	ENSDARG00000069980	559775	ZDB-GENE-060201-4	lman1	Human	79748	6632	LMAN1L	ENSG00000140506	4	3.97	moderate	No	Yes	eggNOG, OrthoDB, Panther, TreeFam		Add	G2F details (LMAN1L) DRscDB Data: (LMAN1L) Human Protein Atlas (HPA)
358	ENSDARG00000069527	100000479	ZDB-GENE-040426-2939	ube2g1b	Human	7326	12482	UBE2G1	ENSG00000132388	8	8.4	moderate	Yes	No	eggNOG, OrthoDB, OrthoFinder, orthoMCL, Panther, RoundUp, TreeFam, ZFIN		Add	G2F details (UBE2G1) DRscDB Data: (UBE2G1) Human Protein Atlas (HPA)
361	ENSDARG00000098312	192340	ZDB-GENE-020419-29	scarb2a	Human	948	1663	CD36	ENSG00000135218	4	3.94	moderate	No	No	eggNOG, OrthoDB, OrthoFinder, RoundUp		Add	G2F details (CD36) DRscDB Data: (CD36) Human Protein Atlas (HPA)
367	ENSDARG00000006235	792017	ZDB-GENE-050913-49	brms1la	Human	25855	17262	BRMS1	ENSG00000174744	5	5.04	moderate	No	No	eggNOG, OrthoDB, OrthoFinder, Panther, RoundUp		Add	G2F details (BRMS1) DRscDB Data: (BRMS1) Human Protein Atlas (HPA)
368	ENSDARG00000000503	58038	ZDB-GENE-000330-4	stx1b	Human	6804	11433	STX1A	ENSG00000106089	5	4.84	moderate	No	No	eggNOG, OrthoDB, OrthoFinder, orthoMCL, RoundUp		Add	G2F details (STX1A) DRscDB Data: (STX1A) Human Protein Atlas (HPA)
368	ENSDARG00000000503	58038	ZDB-GENE-000330-4	stx1b	Human	6810	11439	STX4	ENSG00000103496	4	3.94	moderate	No	No	eggNOG, OrthoDB, OrthoFinder, RoundUp		Add	G2F details (STX4) DRscDB Data: (STX4) Human Protein Atlas (HPA)
368	ENSDARG00000000503	58038	ZDB-GENE-000330-4	stx1b	Human	2054	3403	STX2	ENSG00000111450	4	3.81	moderate	No	No	eggNOG, OrthoDB, OrthoFinder, orthoMCL		Add	G2F details (STX2) DRscDB Data: (STX2) Human Protein Atlas (HPA)
368	ENSDARG00000000503	58038	ZDB-GENE-000330-4	stx1b	Human	6809	11438	STX3	ENSG00000166900	4	3.81	moderate	No	No	eggNOG, OrthoDB, OrthoFinder, orthoMCL		Add	G2F details (STX3) DRscDB Data: (STX3) Human Protein Atlas (HPA)
378	ENSDARG00000033184	556042	ZDB-GENE-030131-1007	prkar2aa	Human	5575	9390	PRKAR1B	ENSG00000188191	5	4.84	moderate	No	No	eggNOG, OrthoDB, OrthoFinder, orthoMCL, RoundUp		Add	G2F details (PRKAR1B) DRscDB Data: (PRKAR1B) Human Protein Atlas (HPA)
378	ENSDARG00000033184	556042	ZDB-GENE-030131-1007	prkar2aa	Human	5577	9392	PRKAR2B	ENSG00000005249	5	4.84	moderate	No	No	eggNOG, OrthoDB, OrthoFinder, orthoMCL, RoundUp		Add	G2F details (PRKAR2B) DRscDB Data: (PRKAR2B) Human Protein Atlas (HPA)
378	ENSDARG00000033184	556042	ZDB-GENE-030131-1007	prkar2aa	Human	5573	9388	PRKAR1A	ENSG00000108946	5	4.84	moderate	No	No	eggNOG, OrthoDB, OrthoFinder, orthoMCL, RoundUp		Add	G2F details (PRKAR1A) DRscDB Data: (PRKAR1A) Human Protein Atlas (HPA)
382	ENSDARG00000074390	100331729	ZDB-GENE-030131-3532	tmem176l.4	Human	28959	29596	TMEM176B	ENSG00000106565	4	3.96	moderate	No	No	eggNOG, Hieranoid, Inparanoid, OMA		Add	G2F details (TMEM176B) DRscDB Data: (TMEM176B) Human Protein Atlas (HPA)
385	ENSDARG00000101251	30496	ZDB-GENE-991026-5	ldha	Human	160287	28335	LDHAL6A	ENSG00000166800	8	7.81	moderate	No	Yes	eggNOG, OrthoDB, OrthoFinder, orthoMCL, Panther, Phylome, RoundUp, TreeFam		Add	G2F details (LDHAL6A) DRscDB Data: (LDHAL6A) Human Protein Atlas (HPA)
385	ENSDARG00000101251	30496	ZDB-GENE-991026-5	ldha	Human	3948	6544	LDHC	ENSG00000166796	7	6.78	moderate	No	Yes	eggNOG, OrthoDB, OrthoFinder, orthoMCL, Panther, Phylome, TreeFam		Add	G2F details (LDHC) DRscDB Data: (LDHC) Human Protein Atlas (HPA)
385	ENSDARG00000101251	30496	ZDB-GENE-991026-5	ldha	Human	92483	21481	LDHAL6B	ENSG00000171989	6	5.88	moderate	No	Yes	eggNOG, OrthoDB, OrthoFinder, Panther, Phylome, TreeFam		Add	G2F details (LDHAL6B) DRscDB Data: (LDHAL6B) Human Protein Atlas (HPA)
385	ENSDARG00000101251	30496	ZDB-GENE-991026-5	ldha	Human	3945	6541	LDHB	ENSG00000111716	5	4.84	moderate	No	No	eggNOG, OrthoDB, OrthoFinder, orthoMCL, RoundUp		Add	G2F details (LDHB) DRscDB Data: (LDHB) Human Protein Atlas (HPA)
389	ENSDARG00000012485	445246	ZDB-GENE-040801-161	aurka	Human	6795	11391	AURKC	ENSG00000105146	4	3.81	moderate	No	No	eggNOG, OrthoDB, OrthoFinder, orthoMCL		Add	G2F details (AURKC) DRscDB Data: (AURKC) Human Protein Atlas (HPA)
389	ENSDARG00000012485	445246	ZDB-GENE-040801-161	aurka	Human	9212	11390	AURKB	ENSG00000178999	4	3.81	moderate	No	No	eggNOG, OrthoDB, OrthoFinder, orthoMCL		Add	G2F details (AURKB) DRscDB Data: (AURKB) Human Protein Atlas (HPA)
393	ENSDARG00000031907	321220	ZDB-GENE-030131-9796	ptbp1b	Human	5725	9583	PTBP1	ENSG00000011304	12	12.33	moderate	Yes	No	eggNOG, Hieranoid, Homologene, Inparanoid, OrthoDB, OrthoFinder, OrthoInspector, orthoMCL, Panther, Phylome, TreeFam, ZFIN		Add	G2F details (PTBP1) DRscDB Data: (PTBP1) Human Protein Atlas (HPA)
393	ENSDARG00000031907	321220	ZDB-GENE-030131-9796	ptbp1b	Human	9991	10253	PTBP3	ENSG00000119314	4	3.81	moderate	No	No	eggNOG, OrthoDB, OrthoFinder, orthoMCL		Add	G2F details (PTBP3) DRscDB Data: (PTBP3) Human Protein Atlas (HPA)
393	ENSDARG00000031907	321220	ZDB-GENE-030131-9796	ptbp1b	Human	58155	17662	PTBP2	ENSG00000117569	4	3.81	moderate	No	No	eggNOG, OrthoDB, OrthoFinder, orthoMCL		Add	G2F details (PTBP2) DRscDB Data: (PTBP2) Human Protein Atlas (HPA)
393	ENSDARG00000031907	321220	ZDB-GENE-030131-9796	ptbp1b	Human	100616459	41868	MIR4745	ENSG00000284361	2	1.94	moderate	No	Yes	Compara, OMA		(1) Show Add	G2F details (MIR4745) DRscDB Data: (MIR4745) Human Protein Atlas (HPA)
404	ENSDARG00000008255	324048	ZDB-GENE-030131-2768	cnot6a	Human	246175	18042	CNOT6L	ENSG00000138767	5	4.84	moderate	No	No	eggNOG, OrthoDB, OrthoFinder, orthoMCL, RoundUp		Add	G2F details (CNOT6L) DRscDB Data: (CNOT6L) Human Protein Atlas (HPA)
405	ENSDARG00000071555	768179	ZDB-GENE-061013-567	zgc:153675	Human	90488	28281	TMEM263	ENSG00000151135	5	4.87	moderate	Yes	No	eggNOG, OrthoDB, orthoMCL, Panther, TreeFam		Add	G2F details (TMEM263) DRscDB Data: (TMEM263) Human Protein Atlas (HPA)
408	ENSDARG00000045696	415142	ZDB-GENE-040625-12	mrpl23	Human	107987373		LOC107987373	ENSG00000276345	5	4.85	moderate	No	Yes	Compara, eggNOG, OMA, OrthoDB, OrthoFinder		Add	G2F details (LOC107987373) DRscDB Data: (LOC107987373) Human Protein Atlas (HPA)
410	ENSDARG00000060309	561567	ZDB-GENE-060524-4	srgap3	Human	23380	19751	SRGAP2	ENSG00000266028	4	3.81	moderate	No	No	eggNOG, OrthoDB, OrthoFinder, orthoMCL		Add	G2F details (SRGAP2) DRscDB Data: (SRGAP2) Human Protein Atlas (HPA)
410	ENSDARG00000060309	561567	ZDB-GENE-060524-4	srgap3	Human	57522	17382	SRGAP1	ENSG00000196935	4	3.81	moderate	No	No	eggNOG, OrthoDB, OrthoFinder, orthoMCL		Add	G2F details (SRGAP1) DRscDB Data: (SRGAP1) Human Protein Atlas (HPA)
411	ENSDARG00000005251	334897	ZDB-GENE-030131-6837	rpe	Human	729020	45241	RPEL1	ENSG00000235376	8	7.95	moderate	No	Yes	Compara, eggNOG, Hieranoid, OMA, OrthoDB, OrthoFinder, OrthoInspector, Panther		Add	G2F details (RPEL1) DRscDB Data: (RPEL1) Human Protein Atlas (HPA)
415	ENSDARG00000007081	406712	ZDB-GENE-040426-2734	pias4a	Human	10401	16861	PIAS3	ENSG00000131788	4	3.94	moderate	No	No	eggNOG, OrthoDB, OrthoFinder, RoundUp		Add	G2F details (PIAS3) DRscDB Data: (PIAS3) Human Protein Atlas (HPA)
415	ENSDARG00000007081	406712	ZDB-GENE-040426-2734	pias4a	Human	8554	2752	PIAS1	ENSG00000033800	4	3.94	moderate	No	No	eggNOG, OrthoDB, OrthoFinder, RoundUp		Add	G2F details (PIAS1) DRscDB Data: (PIAS1) Human Protein Atlas (HPA)
415	ENSDARG00000007081	406712	ZDB-GENE-040426-2734	pias4a	Human	9063	17311	PIAS2	ENSG00000078043	4	3.94	moderate	No	No	eggNOG, OrthoDB, OrthoFinder, RoundUp		Add	G2F details (PIAS2) DRscDB Data: (PIAS2) Human Protein Atlas (HPA)
417	ENSDARG00000016304	393749	ZDB-GENE-040426-1746	tfdp1b	Human	7027	11749	TFDP1	ENSG00000198176	9	9.21	moderate	Yes	No	Compara, eggNOG, OrthoDB, OrthoFinder, orthoMCL, Panther, Phylome, TreeFam, ZFIN		Add	G2F details (TFDP1) DRscDB Data: (TFDP1) Human Protein Atlas (HPA)
417	ENSDARG00000016304	393749	ZDB-GENE-040426-1746	tfdp1b	Human	51270	24603	TFDP3	ENSG00000183434	7	6.89	moderate	No	Yes	eggNOG, OMA, OrthoDB, OrthoFinder, Panther, Phylome, TreeFam		Add	G2F details (TFDP3) DRscDB Data: (TFDP3) Human Protein Atlas (HPA)
417	ENSDARG00000016304	393749	ZDB-GENE-040426-1746	tfdp1b	Human	7029	11751	TFDP2	ENSG00000114126	4	3.81	moderate	No	No	eggNOG, OrthoDB, OrthoFinder, orthoMCL		Add	G2F details (TFDP2) DRscDB Data: (TFDP2) Human Protein Atlas (HPA)
419	ENSDARG00000008310	322041	ZDB-GENE-030131-760	ip6k2a	Human	9807	18360	IP6K1	ENSG00000176095	4	3.94	moderate	No	No	eggNOG, OrthoDB, OrthoFinder, RoundUp		Add	G2F details (IP6K1) DRscDB Data: (IP6K1) Human Protein Atlas (HPA)
419	ENSDARG00000008310	322041	ZDB-GENE-030131-760	ip6k2a	Human	117283	17269	IP6K3	ENSG00000161896	4	3.94	moderate	No	No	eggNOG, OrthoDB, OrthoFinder, RoundUp		Add	G2F details (IP6K3) DRscDB Data: (IP6K3) Human Protein Atlas (HPA)
421	ENSDARG00000056803	393279	ZDB-GENE-040426-1119	ap1s1	Human	130340	18971	AP1S3	ENSG00000152056	5	4.91	moderate	No	No	eggNOG, OrthoDB, OrthoFinder, orthoMCL, Panther		Add	G2F details (AP1S3) DRscDB Data: (AP1S3) Human Protein Atlas (HPA)
421	ENSDARG00000056803	393279	ZDB-GENE-040426-1119	ap1s1	Human	8905	560	AP1S2	ENSG00000182287	5	4.84	moderate	No	No	eggNOG, OrthoDB, OrthoFinder, orthoMCL, RoundUp		Add	G2F details (AP1S2) DRscDB Data: (AP1S2) Human Protein Atlas (HPA)
423	ENSDARG00000004870	30221	ZDB-GENE-991119-4	psen1	Human	5664	9509	PSEN2	ENSG00000143801	6	5.84	moderate	No	No	eggNOG, Hieranoid, OrthoDB, OrthoFinder, orthoMCL, RoundUp		Add	G2F details (PSEN2) DRscDB Data: (PSEN2) Human Protein Atlas (HPA)
426	ENSDARG00000005122	568265	ZDB-GENE-030131-867	atp2a2b	Human	489	813	ATP2A3	ENSG00000074370	4	3.81	moderate	No	No	eggNOG, OrthoDB, OrthoFinder, orthoMCL		Add	G2F details (ATP2A3) DRscDB Data: (ATP2A3) Human Protein Atlas (HPA)
426	ENSDARG00000005122	568265	ZDB-GENE-030131-867	atp2a2b	Human	487	811	ATP2A1	ENSG00000196296	4	3.81	moderate	No	No	eggNOG, OrthoDB, OrthoFinder, orthoMCL		Add	G2F details (ATP2A1) DRscDB Data: (ATP2A1) Human Protein Atlas (HPA)
428	ENSDARG00000045695	30686	ZDB-GENE-990415-162	myca	Human	4609	7553	MYC	ENSG00000136997	13	13.27	moderate	Yes	No	Compara, eggNOG, Hieranoid, Homologene, Inparanoid, OMA, OrthoDB, OrthoInspector, orthoMCL, Panther, Phylome, TreeFam, ZFIN		Add	G2F details (MYC) DRscDB Data: (MYC) Human Protein Atlas (HPA)
429	ENSDARG00000056743	494036	ZDB-GENE-041212-87	cavin4b	Human	347273	33742	CAVIN4	ENSG00000170681	11	11.22	moderate	Yes	No	Compara, eggNOG, Homologene, OMA, OrthoDB, OrthoFinder, orthoMCL, Panther, Phylome, TreeFam, ZFIN		Add	G2F details (CAVIN4) DRscDB Data: (CAVIN4) Human Protein Atlas (HPA)
430	ENSDARG00000051798	100009661	ZDB-GENE-070209-98	brd1b	Human	23774	1102	BRD1	ENSG00000100425	10	10.22	moderate	Yes	No	Compara, eggNOG, OMA, OrthoDB, OrthoFinder, orthoMCL, Panther, Phylome, TreeFam, ZFIN		Add	G2F details (BRD1) DRscDB Data: (BRD1) Human Protein Atlas (HPA)
430	ENSDARG00000051798	100009661	ZDB-GENE-070209-98	brd1b	Human	7862	14255	BRPF1	ENSG00000156983	4	3.81	moderate	No	No	eggNOG, OrthoDB, OrthoFinder, orthoMCL		Add	G2F details (BRPF1) DRscDB Data: (BRPF1) Human Protein Atlas (HPA)
430	ENSDARG00000051798	100009661	ZDB-GENE-070209-98	brd1b	Human	27154	14256	BRPF3	ENSG00000096070	4	3.81	moderate	No	No	eggNOG, OrthoDB, OrthoFinder, orthoMCL		Add	G2F details (BRPF3) DRscDB Data: (BRPF3) Human Protein Atlas (HPA)
431	ENSDARG00000002311	553579	ZDB-GENE-050522-391	fabp11b	Human	2171	3560	FABP5	ENSG00000164687	7	6.81	moderate	No	No	Compara, eggNOG, OrthoDB, OrthoFinder, Panther, Phylome, TreeFam		Add	G2F details (FABP5) DRscDB Data: (FABP5) Human Protein Atlas (HPA)
431	ENSDARG00000002311	553579	ZDB-GENE-050522-391	fabp11b	Human	646486	34524	FABP12	ENSG00000197416	7	6.81	moderate	No	Yes	Compara, eggNOG, OrthoDB, OrthoFinder, Panther, Phylome, TreeFam		Add	G2F details (FABP12) DRscDB Data: (FABP12) Human Protein Atlas (HPA)
431	ENSDARG00000002311	553579	ZDB-GENE-050522-391	fabp11b	Human	2167	3559	FABP4	ENSG00000170323	6	5.88	moderate	No	Yes	eggNOG, OrthoDB, OrthoFinder, Panther, Phylome, TreeFam		Add	G2F details (FABP4) DRscDB Data: (FABP4) Human Protein Atlas (HPA)
431	ENSDARG00000002311	553579	ZDB-GENE-050522-391	fabp11b	Human	2170	3557	FABP3	ENSG00000121769	4	4.01	moderate	No	No	eggNOG, OrthoDB, OrthoFinder, Panther		Add	G2F details (FABP3) DRscDB Data: (FABP3) Human Protein Atlas (HPA)
435	ENSDARG00000029057	791179	ZDB-GENE-060503-338	tm6sf2	Human	53346	11860	TM6SF1	ENSG00000136404	4	3.82	moderate	No	Yes	eggNOG, OrthoDB, OrthoInspector, Phylome		Add	G2F details (TM6SF1) DRscDB Data: (TM6SF1) Human Protein Atlas (HPA)
437	ENSDARG00000008306	556528	ZDB-GENE-050208-411	rdh5	Human	8608	29674	RDH16	ENSG00000139547	5	5.01	moderate	No	No	eggNOG, OrthoDB, OrthoFinder, OrthoInspector, Panther		Add	G2F details (RDH16) DRscDB Data: (RDH16) Human Protein Atlas (HPA)
437	ENSDARG00000008306	556528	ZDB-GENE-050208-411	rdh5	Human	8630	23316	HSD17B6	ENSG00000025423	5	5.01	moderate	No	Yes	eggNOG, OrthoDB, OrthoFinder, OrthoInspector, Panther		Add	G2F details (HSD17B6) DRscDB Data: (HSD17B6) Human Protein Atlas (HPA)
437	ENSDARG00000008306	556528	ZDB-GENE-050208-411	rdh5	Human	10170	16888	DHRS9	ENSG00000073737	4	4.01	moderate	No	No	eggNOG, OrthoDB, OrthoFinder, Panther		Add	G2F details (DHRS9) DRscDB Data: (DHRS9) Human Protein Atlas (HPA)
437	ENSDARG00000008306	556528	ZDB-GENE-050208-411	rdh5	Human	121214	29958	SDR9C7	ENSG00000170426	4	4.01	moderate	No	No	eggNOG, OrthoDB, OrthoFinder, Panther		Add	G2F details (SDR9C7) DRscDB Data: (SDR9C7) Human Protein Atlas (HPA)
438	ENSDARG00000043701	550404	ZDB-GENE-050417-209	gpd1a	Human	23171	28956	GPD1L	ENSG00000152642	5	4.84	moderate	No	No	eggNOG, OrthoDB, OrthoFinder, orthoMCL, RoundUp		Add	G2F details (GPD1L) DRscDB Data: (GPD1L) Human Protein Atlas (HPA)
441	ENSDARG00000010946	266987	ZDB-GENE-021030-3	cbsb	Human	875	1550	CBS	ENSG00000160200	9	9.21	moderate	Yes	No	Compara, eggNOG, Homologene, OMA, OrthoDB, OrthoFinder, orthoMCL, TreeFam, ZFIN		Add	G2F details (CBS) DRscDB Data: (CBS) Human Protein Atlas (HPA)
441	ENSDARG00000010946	266987	ZDB-GENE-021030-3	cbsb	Human	102724560	51829	CBSL	ENSG00000274276	4	3.94	moderate	No	No	Compara, Homologene, OMA, OrthoFinder		Add	G2F details (CBSL) DRscDB Data: (CBSL) Human Protein Atlas (HPA)
442	ENSDARG00000069823	100149324	ZDB-GENE-110418-1	proca1	Human	50487	17934	PLA2G3	ENSG00000100078	4	3.97	moderate	Yes	No	eggNOG, OrthoDB, Panther, TreeFam		Add	G2F details (PLA2G3) DRscDB Data: (PLA2G3) Human Protein Atlas (HPA)
443	ENSDARG00000028740	553434	ZDB-GENE-030717-7	msnb	Human	4478	7373	MSN	ENSG00000147065	7	7.45	moderate	Yes	No	Compara, OrthoDB, OrthoFinder, OrthoInspector, Panther, Phylome, ZFIN		Add	G2F details (MSN) DRscDB Data: (MSN) Human Protein Atlas (HPA)
446	ENSDARG00000077652	556575	ZDB-GENE-081022-106	lratb.2	Human	9227	6685	LRAT	ENSG00000121207	5	4.98	moderate	Yes	No	OrthoDB, OrthoFinder, Panther, Phylome, TreeFam		Add	G2F details (LRAT) DRscDB Data: (LRAT) Human Protein Atlas (HPA)
447	ENSDARG00000012504	393678	ZDB-GENE-040426-1662	rlbp1a	Human	6017	10024	RLBP1	ENSG00000140522	8	8.36	moderate	Yes	No	Compara, eggNOG, OMA, OrthoDB, OrthoFinder, Panther, Phylome, ZFIN		Add	G2F details (RLBP1) DRscDB Data: (RLBP1) Human Protein Atlas (HPA)
449	ENSDARG00000010052	327395	ZDB-GENE-030131-5606	ndrg3b	Human	10397	7679	NDRG1	ENSG00000104419	4	3.94	moderate	No	No	OrthoDB, OrthoFinder, orthoMCL, RoundUp		Add	G2F details (NDRG1) DRscDB Data: (NDRG1) Human Protein Atlas (HPA)
450	ENSDARG00000010785	561901	ZDB-GENE-020708-1	thbs1b	Human	7058	11786	THBS2	ENSG00000186340	4	3.81	moderate	No	No	eggNOG, OrthoDB, OrthoFinder, orthoMCL		Add	G2F details (THBS2) DRscDB Data: (THBS2) Human Protein Atlas (HPA)
451	ENSDARG00000071235	100150452	ZDB-GENE-110408-2	si:ch211-117c9.5	Human	6535	11055	SLC6A8	ENSG00000130821	3	2.87	moderate	Yes	No	eggNOG, OrthoDB, TreeFam		Add	G2F details (SLC6A8) DRscDB Data: (SLC6A8) Human Protein Atlas (HPA)
451	ENSDARG00000071235	100150452	ZDB-GENE-110408-2	si:ch211-117c9.5	Human	28968	13622	SLC6A16	ENSG00000063127	3	2.84	moderate	Yes	No	Compara, eggNOG, OrthoDB		Add	G2F details (SLC6A16) DRscDB Data: (SLC6A16) Human Protein Atlas (HPA)
451	ENSDARG00000071235	100150452	ZDB-GENE-110408-2	si:ch211-117c9.5	Human	6538	11044	SLC6A11	ENSG00000132164	3	2.81	moderate	Yes	No	eggNOG, OrthoDB, orthoMCL		Add	G2F details (SLC6A11) DRscDB Data: (SLC6A11) Human Protein Atlas (HPA)
451	ENSDARG00000071235	100150452	ZDB-GENE-110408-2	si:ch211-117c9.5	Human	6540	11046	SLC6A13	ENSG00000010379	3	2.81	moderate	Yes	No	eggNOG, OrthoDB, orthoMCL		Add	G2F details (SLC6A13) DRscDB Data: (SLC6A13) Human Protein Atlas (HPA)
451	ENSDARG00000071235	100150452	ZDB-GENE-110408-2	si:ch211-117c9.5	Human	6539	11045	SLC6A12	ENSG00000111181	3	2.81	moderate	Yes	No	eggNOG, OrthoDB, orthoMCL		Add	G2F details (SLC6A12) DRscDB Data: (SLC6A12) Human Protein Atlas (HPA)
451	ENSDARG00000071235	100150452	ZDB-GENE-110408-2	si:ch211-117c9.5	Human	6533	11052	SLC6A6	ENSG00000131389	3	2.81	moderate	Yes	No	eggNOG, OrthoDB, orthoMCL		Add	G2F details (SLC6A6) DRscDB Data: (SLC6A6) Human Protein Atlas (HPA)
451	ENSDARG00000071235	100150452	ZDB-GENE-110408-2	si:ch211-117c9.5	Human	6529	11042	SLC6A1	ENSG00000157103	3	2.81	moderate	Yes	No	eggNOG, OrthoDB, orthoMCL		Add	G2F details (SLC6A1) DRscDB Data: (SLC6A1) Human Protein Atlas (HPA)
453	ENSDARG00000039997	406460	ZDB-GENE-040426-2220	ptp4a3a	Human	7803	9634	PTP4A1	ENSG00000112245	4	3.81	moderate	No	No	eggNOG, OrthoDB, OrthoFinder, orthoMCL		Add	G2F details (PTP4A1) DRscDB Data: (PTP4A1) Human Protein Atlas (HPA)
453	ENSDARG00000039997	406460	ZDB-GENE-040426-2220	ptp4a3a	Human	8073	9635	PTP4A2	ENSG00000184007	4	3.81	moderate	No	No	eggNOG, OrthoDB, OrthoFinder, orthoMCL		Add	G2F details (PTP4A2) DRscDB Data: (PTP4A2) Human Protein Atlas (HPA)
454	ENSDARG00000038867	30444	ZDB-GENE-980526-41	shhb	Human	6469	10848	SHH	ENSG00000164690	14	14.27	moderate	Yes	No	Compara, eggNOG, Hieranoid, Homologene, Inparanoid, OMA, OrthoDB, OrthoFinder, OrthoInspector, orthoMCL, Panther, Phylome, TreeFam, ZFIN		Add	G2F details (SHH) DRscDB Data: (SHH) Human Protein Atlas (HPA)
454	ENSDARG00000038867	30444	ZDB-GENE-980526-41	shhb	Human	50846	2865	DHH	ENSG00000139549	5	4.91	moderate	No	No	eggNOG, OrthoDB, OrthoFinder, orthoMCL, Panther		Add	G2F details (DHH) DRscDB Data: (DHH) Human Protein Atlas (HPA)
454	ENSDARG00000038867	30444	ZDB-GENE-980526-41	shhb	Human	3549	5956	IHH	ENSG00000163501	5	4.91	moderate	No	No	eggNOG, OrthoDB, OrthoFinder, orthoMCL, Panther		Add	G2F details (IHH) DRscDB Data: (IHH) Human Protein Atlas (HPA)
455	ENSDARG00000043322	561076	ZDB-GENE-041001-114	gsx2	Human	219409	20374	GSX1	ENSG00000169840	4	3.94	moderate	No	No	eggNOG, OrthoDB, OrthoFinder, RoundUp		Add	G2F details (GSX1) DRscDB Data: (GSX1) Human Protein Atlas (HPA)
456	ENSDARG00000027065	100073328	ZDB-GENE-070615-25	slc38a3a	Human	10991	18044	SLC38A3	ENSG00000188338	6	6.46	moderate	Yes	No	Compara, OMA, OrthoDB, Panther, Phylome, ZFIN		Add	G2F details (SLC38A3) DRscDB Data: (SLC38A3) Human Protein Atlas (HPA)
464	ENSDARG00000021059	64608	ZDB-GENE-001229-2	alas1	Human	212	397	ALAS2	ENSG00000158578	4	3.81	moderate	No	No	eggNOG, OrthoDB, OrthoFinder, orthoMCL		Add	G2F details (ALAS2) DRscDB Data: (ALAS2) Human Protein Atlas (HPA)
466	ENSDARG00000029660	445159	ZDB-GENE-040801-71	commd5	Human	101928879		LOC101928879	ENSG00000173966	2	2.01	moderate	No	Yes	OrthoDB, OrthoFinder		Add	G2F details (LOC101928879) DRscDB Data: (LOC101928879) Human Protein Atlas (HPA)
469	ENSDARG00000043180	325181	ZDB-GENE-030131-3906	gpd1b	Human	2819	4455	GPD1	ENSG00000167588	12	12.25	moderate	Yes	No	Compara, eggNOG, Homologene, OMA, OrthoDB, OrthoFinder, orthoMCL, Panther, Phylome, RoundUp, TreeFam, ZFIN		Add	G2F details (GPD1) DRscDB Data: (GPD1) Human Protein Atlas (HPA)
469	ENSDARG00000043180	325181	ZDB-GENE-030131-3906	gpd1b	Human	23171	28956	GPD1L	ENSG00000152642	5	4.84	moderate	No	No	eggNOG, OrthoDB, OrthoFinder, orthoMCL, RoundUp		Add	G2F details (GPD1L) DRscDB Data: (GPD1L) Human Protein Atlas (HPA)
470	ENSDARG00000056331	798918	ZDB-GENE-021206-7	ahcyl1	Human	23382	22204	AHCYL2	ENSG00000158467	5	4.84	moderate	No	No	eggNOG, OrthoDB, OrthoFinder, orthoMCL, RoundUp		Add	G2F details (AHCYL2) DRscDB Data: (AHCYL2) Human Protein Atlas (HPA)
471	ENSDARG00000035890	335494	ZDB-GENE-030131-7434	fuca1.1	Human	2519	4008	FUCA2	ENSG00000001036	5	4.84	moderate	No	No	eggNOG, OrthoDB, OrthoFinder, orthoMCL, RoundUp		Add	G2F details (FUCA2) DRscDB Data: (FUCA2) Human Protein Atlas (HPA)
472	ENSDARG00000013961	403028	ZDB-GENE-040415-3	slc31a1	Human	1318	11017	SLC31A2	ENSG00000136867	4	3.94	moderate	No	No	eggNOG, OrthoDB, OrthoFinder, RoundUp		Add	G2F details (SLC31A2) DRscDB Data: (SLC31A2) Human Protein Atlas (HPA)
474	ENSDARG00000016687	573723	ZDB-GENE-030131-899	acadvl	Human	28976	21497	ACAD9	ENSG00000177646	4	3.81	moderate	No	No	eggNOG, OrthoDB, OrthoFinder, orthoMCL		Add	G2F details (ACAD9) DRscDB Data: (ACAD9) Human Protein Atlas (HPA)
476	ENSDARG00000062442	101882335	ZDB-GENE-120104-8	meiob	Human	64735	14160	LINC00254	ENSG00000281219	2	1.94	moderate	No	Yes	Compara, OMA		(1) Show Add	G2F details (LINC00254) DRscDB Data: (LINC00254) Human Protein Atlas (HPA)
478	ENSDARG00000019998	327439	ZDB-GENE-030131-5650	slc30a7	Human	64924	19089	SLC30A5	ENSG00000145740	5	4.84	moderate	No	No	eggNOG, OrthoDB, OrthoFinder, orthoMCL, RoundUp		Add	G2F details (SLC30A5) DRscDB Data: (SLC30A5) Human Protein Atlas (HPA)
479	ENSDARG00000014106	403001	ZDB-GENE-040426-1815	cfl2	Human	11034	15750	DSTN	ENSG00000125868	5	5.04	moderate	No	No	eggNOG, OrthoDB, OrthoFinder, Panther, RoundUp		Add	G2F details (DSTN) DRscDB Data: (DSTN) Human Protein Atlas (HPA)
479	ENSDARG00000014106	403001	ZDB-GENE-040426-1815	cfl2	Human	1072	1874	CFL1	ENSG00000172757	5	5.04	moderate	No	No	OrthoDB, OrthoFinder, orthoMCL, Panther, RoundUp		Add	G2F details (CFL1) DRscDB Data: (CFL1) Human Protein Atlas (HPA)
481	ENSDARG00000043483	353179	ZDB-GENE-030508-1	otx5	Human	503582	30146	ARGFX	ENSG00000186103	3	2.77	moderate	No	Yes	eggNOG, Phylome, TreeFam		Add	G2F details (ARGFX) DRscDB Data: (ARGFX) Human Protein Atlas (HPA)
482	ENSDARG00000013430	322228	ZDB-GENE-030131-947	bhmt	Human	23743	1048	BHMT2	ENSG00000132840	7	6.81	moderate	No	Yes	Compara, eggNOG, OrthoDB, OrthoFinder, Panther, Phylome, TreeFam		Add	G2F details (BHMT2) DRscDB Data: (BHMT2) Human Protein Atlas (HPA)
485	ENSDARG00000030703	30462	ZDB-GENE-980526-27	otx2a	Human	5013	8521	OTX1	ENSG00000115507	6	5.78	moderate	Yes	No	eggNOG, OrthoDB, orthoMCL, Panther, Phylome, TreeFam		Add	G2F details (OTX1) DRscDB Data: (OTX1) Human Protein Atlas (HPA)
486	ENSDARG00000020847	324307	ZDB-GENE-030131-3027	atp6v0a1a	Human	23545	18481	ATP6V0A2	ENSG00000185344	4	3.81	moderate	No	No	eggNOG, OrthoDB, OrthoFinder, orthoMCL		Add	G2F details (ATP6V0A2) DRscDB Data: (ATP6V0A2) Human Protein Atlas (HPA)
486	ENSDARG00000020847	324307	ZDB-GENE-030131-3027	atp6v0a1a	Human	50617	866	ATP6V0A4	ENSG00000105929	4	3.81	moderate	No	No	eggNOG, OrthoDB, OrthoFinder, orthoMCL		Add	G2F details (ATP6V0A4) DRscDB Data: (ATP6V0A4) Human Protein Atlas (HPA)
488	ENSDARG00000015575	324340	ZDB-GENE-030131-3060	cyp3c1	Human	64816	17450	CYP3A43	ENSG00000021461	7	6.71	moderate	No	No	Compara, eggNOG, OrthoDB, orthoMCL, Panther, Phylome, TreeFam		Add	G2F details (CYP3A43) DRscDB Data: (CYP3A43) Human Protein Atlas (HPA)
488	ENSDARG00000015575	324340	ZDB-GENE-030131-3060	cyp3c1	Human	1577	2638	CYP3A5	ENSG00000106258	7	6.71	moderate	No	No	Compara, eggNOG, OrthoDB, orthoMCL, Panther, Phylome, TreeFam		Add	G2F details (CYP3A5) DRscDB Data: (CYP3A5) Human Protein Atlas (HPA)
488	ENSDARG00000015575	324340	ZDB-GENE-030131-3060	cyp3c1	Human	100861540	51504	CYP3A7-CYP3A51P	ENSG00000282301	5	4.85	moderate	No	No	Compara, eggNOG, OrthoDB, Panther, Phylome		Add	G2F details (CYP3A7-CYP3A51P) DRscDB Data: (CYP3A7-CYP3A51P) Human Protein Atlas (HPA)
488	ENSDARG00000015575	324340	ZDB-GENE-030131-3060	cyp3c1	Human	1551	2640	CYP3A7	ENSG00000160870	4	3.89	moderate	No	Yes	Compara, orthoMCL, Panther, TreeFam		Add	G2F details (CYP3A7) DRscDB Data: (CYP3A7) Human Protein Atlas (HPA)
489	ENSDARG00000007682	338304	ZDB-GENE-030219-204	ppdpfa	Human	79144	16142	PPDPF	ENSG00000125534	12	12.36	moderate	Yes	No	Compara, eggNOG, Hieranoid, Homologene, Inparanoid, OrthoDB, OrthoFinder, OrthoInspector, Panther, Phylome, TreeFam, ZFIN		Add	G2F details (PPDPF) DRscDB Data: (PPDPF) Human Protein Atlas (HPA)
489	ENSDARG00000007682	338304	ZDB-GENE-030219-204	ppdpfa	Human	492307	31745	PPDPFL	ENSG00000168333	2	2.03	moderate	No	Yes	Compara, Panther		Add	G2F details (PPDPFL) DRscDB Data: (PPDPFL) Human Protein Atlas (HPA)
497	ENSDARG00000034473	556314	ZDB-GENE-120508-1	ttyh3a	Human	80727	22222	TTYH3	ENSG00000136295	11	11.22	moderate	Yes	No	Compara, eggNOG, Homologene, OMA, OrthoDB, OrthoFinder, orthoMCL, Panther, Phylome, TreeFam, ZFIN		Add	G2F details (TTYH3) DRscDB Data: (TTYH3) Human Protein Atlas (HPA)
498	ENSDARG00000028087	368239	ZDB-GENE-030326-5	aldh2.2	Human	217	404	ALDH2	ENSG00000111275	9	9.39	moderate	Yes	No	eggNOG, Homologene, OMA, OrthoDB, OrthoFinder, Panther, Phylome, TreeFam, ZFIN		Add	G2F details (ALDH2) DRscDB Data: (ALDH2) Human Protein Atlas (HPA)
498	ENSDARG00000028087	393462	ZDB-GENE-040426-1262	aldh2.1	Human	219	407	ALDH1B1	ENSG00000137124	4	3.9	moderate	No	Yes	eggNOG, OrthoFinder, orthoMCL, Panther		Add	G2F details (ALDH1B1) DRscDB Data: (ALDH1B1) Human Protein Atlas (HPA)
498	ENSDARG00000028087	393462	ZDB-GENE-040426-1262	aldh2.1	Human	8854	15472	ALDH1A2	ENSG00000128918	4	3.81	moderate	No	No	eggNOG, OrthoDB, OrthoFinder, orthoMCL		Add	G2F details (ALDH1A2) DRscDB Data: (ALDH1A2) Human Protein Atlas (HPA)
498	ENSDARG00000028087	393462	ZDB-GENE-040426-1262	aldh2.1	Human	220	409	ALDH1A3	ENSG00000184254	4	3.81	moderate	No	No	eggNOG, OrthoDB, OrthoFinder, orthoMCL		Add	G2F details (ALDH1A3) DRscDB Data: (ALDH1A3) Human Protein Atlas (HPA)
498	ENSDARG00000028087	393462	ZDB-GENE-040426-1262	aldh2.1	Human	216	402	ALDH1A1	ENSG00000165092	4	3.81	moderate	No	Yes	eggNOG, OrthoDB, OrthoFinder, orthoMCL		Add	G2F details (ALDH1A1) DRscDB Data: (ALDH1A1) Human Protein Atlas (HPA)
500	ENSDARG00000034187	368217	ZDB-GENE-030804-2	calm1b	Human	801	1442	CALM1	ENSG00000198668	5	5.31	moderate	Yes	No	eggNOG, OMA, OrthoFinder, orthoMCL, ZFIN		Add	G2F details (CALM1) DRscDB Data: (CALM1) Human Protein Atlas (HPA)
500	ENSDARG00000034187	368217	ZDB-GENE-030804-2	calm1b	Human	808	1449	CALM3	ENSG00000160014	5	4.74	moderate	Yes	No	Compara, eggNOG, OMA, OrthoFinder, orthoMCL		Add	G2F details (CALM3) DRscDB Data: (CALM3) Human Protein Atlas (HPA)
504	ENSDARG00000003395	553354	ZDB-GENE-070802-4	col4a3	Human	1285	2204	COL4A3	ENSG00000169031	2	2.51	moderate	Yes	No	OrthoDB, ZFIN		Add	G2F details (COL4A3) DRscDB Data: (COL4A3) Human Protein Atlas (HPA)
505	ENSDARG00000007959	394135	ZDB-GENE-040426-1582	hibadhb	Human	11112	4907	HIBADH	ENSG00000106049	11	11.22	moderate	Yes	No	Compara, eggNOG, Homologene, OMA, OrthoDB, OrthoFinder, orthoMCL, Panther, Phylome, TreeFam, ZFIN		Add	G2F details (HIBADH) DRscDB Data: (HIBADH) Human Protein Atlas (HPA)
508	ENSDARG00000001975	334098	ZDB-GENE-030131-6030	hsd11b2	Human	121214	29958	SDR9C7	ENSG00000170426	4	3.94	moderate	No	No	eggNOG, OrthoDB, OrthoFinder, RoundUp		Add	G2F details (SDR9C7) DRscDB Data: (SDR9C7) Human Protein Atlas (HPA)
508	ENSDARG00000001975	334098	ZDB-GENE-030131-6030	hsd11b2	Human	8630	23316	HSD17B6	ENSG00000025423	4	3.94	moderate	No	No	eggNOG, OrthoDB, OrthoFinder, RoundUp		Add	G2F details (HSD17B6) DRscDB Data: (HSD17B6) Human Protein Atlas (HPA)
510	ENSDARG00000027595	352921	ZDB-GENE-030411-1	selenot1b	Human	51714	18136	SELENOT	ENSG00000198843	9	8.72	moderate	Yes	No	Compara, eggNOG, OMA, OrthoDB, OrthoFinder, orthoMCL, Panther, Phylome, TreeFam		Add	G2F details (SELENOT) DRscDB Data: (SELENOT) Human Protein Atlas (HPA)
511	ENSDARG00000044362	678653	ZDB-GENE-050201-2	unc119b	Human	84747	16488	UNC119B	ENSG00000175970	6	5.84	moderate	No	No	eggNOG, Hieranoid, OrthoDB, OrthoFinder, orthoMCL, RoundUp		Add	G2F details (UNC119B) DRscDB Data: (UNC119B) Human Protein Atlas (HPA)
514	ENSDARG00000015349	541486	ZDB-GENE-050327-9	mfge8a	Human	4240	7036	MFGE8	ENSG00000140545	11	11.22	moderate	Yes	No	Compara, eggNOG, Homologene, OMA, OrthoDB, OrthoFinder, orthoMCL, Panther, Phylome, TreeFam, ZFIN		Add	G2F details (MFGE8) DRscDB Data: (MFGE8) Human Protein Atlas (HPA)
515	ENSDARG00000099351	317638	ZDB-GENE-021231-1	igfbp1a	Human	3487	5473	IGFBP4	ENSG00000141753	3	2.94	moderate	No	Yes	eggNOG, OrthoDB, RoundUp		Add	G2F details (IGFBP4) DRscDB Data: (IGFBP4) Human Protein Atlas (HPA)
516	ENSDARG00000045153	322973	ZDB-GENE-030131-1693	pdap1a	Human	11333	14634	PDAP1	ENSG00000106244	9	9.4	moderate	Yes	No	eggNOG, Hieranoid, OrthoDB, OrthoFinder, orthoMCL, Panther, RoundUp, TreeFam, ZFIN		Add	G2F details (PDAP1) DRscDB Data: (PDAP1) Human Protein Atlas (HPA)
518	ENSDARG00000098224	449652	ZDB-GENE-041010-90	tlcd4b	Human	148534	26477	TLCD4	ENSG00000152078	6	6.27	moderate	Yes	No	eggNOG, OrthoDB, OrthoFinder, orthoMCL, TreeFam, ZFIN		Add	G2F details (TLCD4) DRscDB Data: (TLCD4) Human Protein Atlas (HPA)
519	ENSDARG00000054864	796801	ZDB-GENE-061009-28	aplp2	Human	351	620	APP	ENSG00000142192	5	4.84	moderate	No	No	eggNOG, OrthoDB, OrthoFinder, orthoMCL, RoundUp		Add	G2F details (APP) DRscDB Data: (APP) Human Protein Atlas (HPA)
519	ENSDARG00000054864	796801	ZDB-GENE-061009-28	aplp2	Human	333	597	APLP1	ENSG00000105290	4	3.94	moderate	No	No	eggNOG, OrthoDB, OrthoFinder, RoundUp		Add	G2F details (APLP1) DRscDB Data: (APLP1) Human Protein Atlas (HPA)
520	ENSDARG00000038694	541409	ZDB-GENE-050320-111	zgc:101744	Human	92840	30078	REEP6	ENSG00000115255	6	5.97	moderate	Yes	No	eggNOG, OrthoDB, OrthoFinder, OrthoInspector, Panther, TreeFam		Add	G2F details (REEP6) DRscDB Data: (REEP6) Human Protein Atlas (HPA)
520	ENSDARG00000038694	541409	ZDB-GENE-050320-111	zgc:101744	Human	7905	30077	REEP5	ENSG00000129625	4	3.81	moderate	No	No	eggNOG, OrthoDB, OrthoFinder, orthoMCL		Add	G2F details (REEP5) DRscDB Data: (REEP5) Human Protein Atlas (HPA)
521	ENSDARG00000016963	100534752	ZDB-GENE-110408-16	slc16a1a	Human	6566	10922	SLC16A1	ENSG00000155380	12	12.46	moderate	Yes	No	Compara, eggNOG, Hieranoid, Homologene, Inparanoid, OMA, OrthoDB, OrthoFinder, OrthoInspector, Panther, TreeFam, ZFIN		Add	G2F details (SLC16A1) DRscDB Data: (SLC16A1) Human Protein Atlas (HPA)
522	ENSDARG00000027088	336492	ZDB-GENE-030131-8436	ptgdsb.1	Human	389812	33777	LCN15	ENSG00000177984	6	5.9	moderate	No	No	Compara, OrthoFinder, OrthoInspector, Panther, Phylome, TreeFam		Add	G2F details (LCN15) DRscDB Data: (LCN15) Human Protein Atlas (HPA)
522	ENSDARG00000027088	336492	ZDB-GENE-030131-8436	ptgdsb.1	Human	3934	6526	LCN2	ENSG00000148346	5	4.91	moderate	No	Yes	Compara, OrthoDB, Panther, Phylome, TreeFam		Add	G2F details (LCN2) DRscDB Data: (LCN2) Human Protein Atlas (HPA)
522	ENSDARG00000027088	336492	ZDB-GENE-030131-8436	ptgdsb.1	Human	414332	20892	LCN10	ENSG00000187922	5	4.91	moderate	No	Yes	Compara, OrthoDB, Panther, Phylome, TreeFam		Add	G2F details (LCN10) DRscDB Data: (LCN10) Human Protein Atlas (HPA)
522	ENSDARG00000027088	336492	ZDB-GENE-030131-8436	ptgdsb.1	Human	286256	28733	LCN12	ENSG00000184925	4	3.9	moderate	No	Yes	Compara, Panther, Phylome, TreeFam		Add	G2F details (LCN12) DRscDB Data: (LCN12) Human Protein Atlas (HPA)
522	ENSDARG00000027088	336492	ZDB-GENE-030131-8436	ptgdsb.1	Human	401562	34436	LCNL1	ENSG00000214402	4	3.84	moderate	No	Yes	Compara, eggNOG, Panther, Phylome		Add	G2F details (LCNL1) DRscDB Data: (LCNL1) Human Protein Atlas (HPA)
522	ENSDARG00000027088	336492	ZDB-GENE-030131-8436	ptgdsb.1	Human	5047	8573	PAEP	ENSG00000122133	3	3.02	moderate	No	Yes	OrthoDB, Panther, Phylome		Add	G2F details (PAEP) DRscDB Data: (PAEP) Human Protein Atlas (HPA)
522	ENSDARG00000027088	336492	ZDB-GENE-030131-8436	ptgdsb.1	Human	138307	27038	LCN8	ENSG00000204001	3	2.94	moderate	No	Yes	Compara, Panther, Phylome		Add	G2F details (LCN8) DRscDB Data: (LCN8) Human Protein Atlas (HPA)
522	ENSDARG00000027088	336492	ZDB-GENE-030131-8436	ptgdsb.1	Human	158062	17337	LCN6	ENSG00000267206	3	2.94	moderate	No	Yes	Compara, Panther, Phylome		Add	G2F details (LCN6) DRscDB Data: (LCN6) Human Protein Atlas (HPA)
522	ENSDARG00000027088	336492	ZDB-GENE-030131-8436	ptgdsb.1	Human	29989	23381	OBP2B	ENSG00000171102	2	2.01	moderate	No	Yes	Panther, Phylome		Add	G2F details (OBP2B) DRscDB Data: (OBP2B) Human Protein Atlas (HPA)
522	ENSDARG00000027088	336492	ZDB-GENE-030131-8436	ptgdsb.1	Human	392399	17442	LCN9		2	2.01	moderate	No	Yes	Panther, Phylome		Add	G2F details (LCN9) DRscDB Data: (LCN9) Human Protein Atlas (HPA)
522	ENSDARG00000027088	336492	ZDB-GENE-030131-8436	ptgdsb.1	Human	29991	23380	OBP2A	ENSG00000122136	2	2.01	moderate	No	Yes	Panther, Phylome		Add	G2F details (OBP2A) DRscDB Data: (OBP2A) Human Protein Atlas (HPA)
522	ENSDARG00000027088	336492	ZDB-GENE-030131-8436	ptgdsb.1	Human	3933	6525	LCN1	ENSG00000160349	2	2.01	moderate	No	Yes	Panther, Phylome		Add	G2F details (LCN1) DRscDB Data: (LCN1) Human Protein Atlas (HPA)
523	ENSDARG00000018077	791484	ZDB-GENE-050421-2	rbp1.1	Human	5947	9919	RBP1	ENSG00000114115	10	10.34	moderate	Yes	No	Compara, eggNOG, OMA, OrthoDB, OrthoFinder, orthoMCL, Panther, RoundUp, TreeFam, ZFIN		Add	G2F details (RBP1) DRscDB Data: (RBP1) Human Protein Atlas (HPA)
523	ENSDARG00000018077	791484	ZDB-GENE-050421-2	rbp1.1	Human	83758	15847	RBP5	ENSG00000139194	4	3.97	moderate	No	No	eggNOG, OrthoDB, Panther, TreeFam		Add	G2F details (RBP5) DRscDB Data: (RBP5) Human Protein Atlas (HPA)
524	ENSDARG00000039490	393909	ZDB-GENE-040426-744	pitpnaa	Human	5306	9001	PITPNA	ENSG00000174238	9	9.21	moderate	Yes	No	Compara, eggNOG, OrthoDB, OrthoFinder, orthoMCL, Panther, Phylome, TreeFam, ZFIN		Add	G2F details (PITPNA) DRscDB Data: (PITPNA) Human Protein Atlas (HPA)
524	ENSDARG00000039490	393909	ZDB-GENE-040426-744	pitpnaa	Human	23760	9002	PITPNB	ENSG00000180957	4	3.81	moderate	No	No	eggNOG, OrthoDB, OrthoFinder, orthoMCL		Add	G2F details (PITPNB) DRscDB Data: (PITPNB) Human Protein Atlas (HPA)
526	ENSDARG00000061120	494042	ZDB-GENE-041212-6	slc43a2b	Human	8501	9225	SLC43A1	ENSG00000149150	4	3.91	moderate	No	No	Hieranoid, OrthoDB, OrthoFinder, orthoMCL		Add	G2F details (SLC43A1) DRscDB Data: (SLC43A1) Human Protein Atlas (HPA)
527	ENSDARG00000062059	797251	ZDB-GENE-081104-189	si:ch211-236l14.4	Human	57462	19918	MYORG	ENSG00000164976	2	1.91	moderate	Yes	No	eggNOG, OrthoDB		Add	G2F details (MYORG) DRscDB Data: (MYORG) Human Protein Atlas (HPA)
527	ENSDARG00000062059	797251	ZDB-GENE-081104-189	si:ch211-236l14.4	Human	8972	7043	MGAM	ENSG00000257335	2	1.83	moderate	Yes	No	Compara, eggNOG		Add	G2F details (MGAM) DRscDB Data: (MGAM) Human Protein Atlas (HPA)
527	ENSDARG00000062059	797251	ZDB-GENE-081104-189	si:ch211-236l14.4	Human	6476	10856	SI	ENSG00000090402	2	1.83	moderate	Yes	No	Compara, eggNOG		Add	G2F details (SI) DRscDB Data: (SI) Human Protein Atlas (HPA)
528	ENSDARG00000044295	449831	ZDB-GENE-041010-81	pip5k1ba	Human	8395	8995	PIP5K1B	ENSG00000107242	9	9.21	moderate	Yes	No	Compara, eggNOG, OrthoDB, OrthoFinder, orthoMCL, Panther, Phylome, TreeFam, ZFIN		Add	G2F details (PIP5K1B) DRscDB Data: (PIP5K1B) Human Protein Atlas (HPA)
528	ENSDARG00000044295	449831	ZDB-GENE-041010-81	pip5k1ba	Human	8394	8994	PIP5K1A	ENSG00000143398	4	3.81	moderate	No	No	eggNOG, OrthoDB, OrthoFinder, orthoMCL		Add	G2F details (PIP5K1A) DRscDB Data: (PIP5K1A) Human Protein Atlas (HPA)
528	ENSDARG00000044295	449831	ZDB-GENE-041010-81	pip5k1ba	Human	23396	8996	PIP5K1C	ENSG00000186111	4	3.81	moderate	No	No	eggNOG, OrthoDB, OrthoFinder, orthoMCL		Add	G2F details (PIP5K1C) DRscDB Data: (PIP5K1C) Human Protein Atlas (HPA)
529	ENSDARG00000104387	100006379	ZDB-GENE-091112-19	slc4a5	Human	57282	13811	SLC4A10	ENSG00000144290	4	3.81	moderate	No	No	eggNOG, OrthoDB, OrthoFinder, orthoMCL		Add	G2F details (SLC4A10) DRscDB Data: (SLC4A10) Human Protein Atlas (HPA)
529	ENSDARG00000104387	100006379	ZDB-GENE-091112-19	slc4a5	Human	9498	11034	SLC4A8	ENSG00000050438	4	3.81	moderate	No	No	eggNOG, OrthoDB, OrthoFinder, orthoMCL		Add	G2F details (SLC4A8) DRscDB Data: (SLC4A8) Human Protein Atlas (HPA)
529	ENSDARG00000104387	100006379	ZDB-GENE-091112-19	slc4a5	Human	8671	11030	SLC4A4	ENSG00000080493	4	3.81	moderate	No	No	eggNOG, OrthoDB, OrthoFinder, orthoMCL		Add	G2F details (SLC4A4) DRscDB Data: (SLC4A4) Human Protein Atlas (HPA)
529	ENSDARG00000104387	100006379	ZDB-GENE-091112-19	slc4a5	Human	83697	11035	SLC4A9	ENSG00000113073	4	3.81	moderate	No	No	eggNOG, OrthoDB, OrthoFinder, orthoMCL		Add	G2F details (SLC4A9) DRscDB Data: (SLC4A9) Human Protein Atlas (HPA)
529	ENSDARG00000104387	100006379	ZDB-GENE-091112-19	slc4a5	Human	6508	11029	SLC4A3	ENSG00000114923	4	3.81	moderate	No	No	eggNOG, OrthoDB, OrthoFinder, orthoMCL		Add	G2F details (SLC4A3) DRscDB Data: (SLC4A3) Human Protein Atlas (HPA)
529	ENSDARG00000104387	100006379	ZDB-GENE-091112-19	slc4a5	Human	6521	11027	SLC4A1	ENSG00000004939	4	3.81	moderate	No	No	eggNOG, OrthoDB, OrthoFinder, orthoMCL		Add	G2F details (SLC4A1) DRscDB Data: (SLC4A1) Human Protein Atlas (HPA)
529	ENSDARG00000104387	100006379	ZDB-GENE-091112-19	slc4a5	Human	9497	11033	SLC4A7	ENSG00000033867	4	3.81	moderate	No	No	eggNOG, OrthoDB, OrthoFinder, orthoMCL		Add	G2F details (SLC4A7) DRscDB Data: (SLC4A7) Human Protein Atlas (HPA)
529	ENSDARG00000104387	100006379	ZDB-GENE-091112-19	slc4a5	Human	6522	11028	SLC4A2	ENSG00000164889	4	3.81	moderate	No	No	eggNOG, OrthoDB, OrthoFinder, orthoMCL		Add	G2F details (SLC4A2) DRscDB Data: (SLC4A2) Human Protein Atlas (HPA)
530	ENSDARG00000028862	555864	ZDB-GENE-131127-122	rdh20	Human	157506	19975	RDH10	ENSG00000121039	5	4.97	moderate	Yes	No	eggNOG, OrthoDB, OrthoFinder, Panther, TreeFam		Add	G2F details (RDH10) DRscDB Data: (RDH10) Human Protein Atlas (HPA)
530	ENSDARG00000028862	555864	ZDB-GENE-131127-122	rdh20	Human	195814	30311	SDR16C5	ENSG00000170786	4	3.81	moderate	No	No	eggNOG, OrthoDB, OrthoFinder, orthoMCL		Add	G2F details (SDR16C5) DRscDB Data: (SDR16C5) Human Protein Atlas (HPA)
530	ENSDARG00000028862	555864	ZDB-GENE-131127-122	rdh20	Human	345275	18685	HSD17B13	ENSG00000170509	3	2.91	moderate	No	Yes	eggNOG, OrthoDB, OrthoFinder		Add	G2F details (HSD17B13) DRscDB Data: (HSD17B13) Human Protein Atlas (HPA)
532	ENSDARG00000087059	767744	ZDB-GENE-060929-88	selenou1b	Human	84293	28651	PRXL2A	ENSG00000122378	5	4.97	moderate	Yes	No	eggNOG, OrthoDB, OrthoFinder, Panther, TreeFam		Add	G2F details (PRXL2A) DRscDB Data: (PRXL2A) Human Protein Atlas (HPA)
533	ENSDARG00000097827	563149	ZDB-GENE-030131-7889	lrp1aa	Human	4035	6692	LRP1	ENSG00000123384	6	6.55	moderate	Yes	No	Compara, OMA, OrthoDB, OrthoFinder, Panther, ZFIN		Add	G2F details (LRP1) DRscDB Data: (LRP1) Human Protein Atlas (HPA)
535	ENSDARG00000055510	368214	ZDB-GENE-030516-4	ypel3	Human	219539	18328	YPEL4	ENSG00000166793	7	6.94	moderate	No	Yes	eggNOG, Homologene, OrthoDB, OrthoFinder, orthoMCL, Panther, RoundUp		Add	G2F details (YPEL4) DRscDB Data: (YPEL4) Human Protein Atlas (HPA)
535	ENSDARG00000055510	368214	ZDB-GENE-030516-4	ypel3	Human	388403	18326	YPEL2	ENSG00000175155	7	6.71	moderate	No	No	eggNOG, OrthoDB, OrthoFinder, orthoMCL, Phylome, RoundUp, TreeFam		Add	G2F details (YPEL2) DRscDB Data: (YPEL2) Human Protein Atlas (HPA)
535	ENSDARG00000055510	368214	ZDB-GENE-030516-4	ypel3	Human	29799	12845	YPEL1	ENSG00000100027	6	5.8	moderate	No	No	eggNOG, OrthoDB, OrthoFinder, orthoMCL, RoundUp, TreeFam		Add	G2F details (YPEL1) DRscDB Data: (YPEL1) Human Protein Atlas (HPA)
535	ENSDARG00000055510	368214	ZDB-GENE-030516-4	ypel3	Human	51646	18329	YPEL5	ENSG00000119801	5	4.84	moderate	No	No	eggNOG, OrthoDB, OrthoFinder, orthoMCL, RoundUp		Add	G2F details (YPEL5) DRscDB Data: (YPEL5) Human Protein Atlas (HPA)
537	ENSDARG00000102229	100537717	ZDB-GENE-101025-1	mapk8ip1a	Human	9479	6882	MAPK8IP1	ENSG00000121653	7	7.4	moderate	Yes	No	Compara, eggNOG, OrthoDB, OrthoFinder, Panther, TreeFam, ZFIN		Add	G2F details (MAPK8IP1) DRscDB Data: (MAPK8IP1) Human Protein Atlas (HPA)
538	ENSDARG00000070972	560648	ZDB-GENE-060503-138	si:ch211-81a5.8	Human	594855	27652	CPLX3	ENSG00000213578	2	2.06	moderate	Yes	No	Panther, TreeFam		Add	G2F details (CPLX3) DRscDB Data: (CPLX3) Human Protein Atlas (HPA)
539	ENSDARG00000094730	619256	ZDB-GENE-050913-108	acbd7	Human	1622	2690	DBI	ENSG00000155368	4	3.94	moderate	No	No	eggNOG, OrthoDB, OrthoFinder, RoundUp		Add	G2F details (DBI) DRscDB Data: (DBI) Human Protein Atlas (HPA)
540	ENSDARG00000037097	494041	ZDB-GENE-041212-5	slc7a2	Human	6541	11057	SLC7A1	ENSG00000139514	4	3.94	moderate	No	No	OrthoDB, OrthoFinder, orthoMCL, RoundUp		Add	G2F details (SLC7A1) DRscDB Data: (SLC7A1) Human Protein Atlas (HPA)
540	ENSDARG00000037097	494041	ZDB-GENE-041212-5	slc7a2	Human	84889	11061	SLC7A3	ENSG00000165349	4	3.94	moderate	No	No	OrthoDB, OrthoFinder, orthoMCL, RoundUp		Add	G2F details (SLC7A3) DRscDB Data: (SLC7A3) Human Protein Atlas (HPA)
541	ENSDARG00000056410	100126232	ZDB-GENE-071015-2	fdx1	Human	112812	30546	FDX2	ENSG00000267673	4	3.95	moderate	No	No	eggNOG, OMA, OrthoDB, RoundUp		Add	G2F details (FDX2) DRscDB Data: (FDX2) Human Protein Atlas (HPA)
542	ENSDARG00000052690	566685	ZDB-GENE-030131-2913	arrdc3a	Human	27106	25225	ARRDC2	ENSG00000105643	4	3.94	moderate	No	No	eggNOG, OrthoDB, OrthoFinder, RoundUp		Add	G2F details (ARRDC2) DRscDB Data: (ARRDC2) Human Protein Atlas (HPA)
542	ENSDARG00000052690	566685	ZDB-GENE-030131-2913	arrdc3a	Human	10628	16952	TXNIP	ENSG00000265972	4	3.94	moderate	No	No	eggNOG, OrthoDB, OrthoFinder, RoundUp		Add	G2F details (TXNIP) DRscDB Data: (TXNIP) Human Protein Atlas (HPA)
542	ENSDARG00000052690	566685	ZDB-GENE-030131-2913	arrdc3a	Human	91947	28087	ARRDC4	ENSG00000140450	3	2.91	moderate	No	Yes	eggNOG, OrthoDB, OrthoFinder		Add	G2F details (ARRDC4) DRscDB Data: (ARRDC4) Human Protein Atlas (HPA)
543	ENSDARG00000043342	798788	ZDB-GENE-070222-3	gpx3	Human	2880	4557	GPX5	ENSG00000224586	7	6.81	moderate	No	Yes	Compara, eggNOG, OrthoDB, OrthoFinder, Panther, Phylome, TreeFam		Add	G2F details (GPX5) DRscDB Data: (GPX5) Human Protein Atlas (HPA)
543	ENSDARG00000043342	798788	ZDB-GENE-070222-3	gpx3	Human	257202	4558	GPX6	ENSG00000198704	7	6.81	moderate	No	Yes	Compara, eggNOG, OrthoDB, OrthoFinder, Panther, Phylome, TreeFam		Add	G2F details (GPX6) DRscDB Data: (GPX6) Human Protein Atlas (HPA)
544	ENSDARG00000006220	406731	ZDB-GENE-040426-2762	ugt1ab	Human	54658	12530	UGT1A1	ENSG00000241635	8	7.92	moderate	Yes	No	eggNOG, Hieranoid, Homologene, Inparanoid, OrthoInspector, Panther, Phylome, TreeFam		Add	G2F details (UGT1A1) DRscDB Data: (UGT1A1) Human Protein Atlas (HPA)
544	ENSDARG00000006220	406731	ZDB-GENE-040426-2762	ugt1ab	Human	54659	12535	UGT1A3	ENSG00000288702	7	6.92	moderate	No	No	eggNOG, Hieranoid, Inparanoid, OrthoInspector, Panther, Phylome, TreeFam		Add	G2F details (UGT1A3) DRscDB Data: (UGT1A3) Human Protein Atlas (HPA)
544	ENSDARG00000006220	406731	ZDB-GENE-040426-2762	ugt1ab	Human	54657	12536	UGT1A4	ENSG00000244474	5	5.06	moderate	No	No	Hieranoid, Inparanoid, OrthoInspector, Panther, Phylome		Add	G2F details (UGT1A4) DRscDB Data: (UGT1A4) Human Protein Atlas (HPA)
544	ENSDARG00000006220	406731	ZDB-GENE-040426-2762	ugt1ab	Human	54575	12531	UGT1A10	ENSG00000242515	5	5.06	moderate	No	No	Hieranoid, Inparanoid, OrthoInspector, Panther, Phylome		Add	G2F details (UGT1A10) DRscDB Data: (UGT1A10) Human Protein Atlas (HPA)
544	ENSDARG00000006220	406731	ZDB-GENE-040426-2762	ugt1ab	Human	54577	12539	UGT1A7	ENSG00000244122	5	5.06	moderate	No	No	Hieranoid, Inparanoid, OrthoInspector, Panther, Phylome		Add	G2F details (UGT1A7) DRscDB Data: (UGT1A7) Human Protein Atlas (HPA)
544	ENSDARG00000006220	406731	ZDB-GENE-040426-2762	ugt1ab	Human	54579	12537	UGT1A5	ENSG00000288705	5	5.06	moderate	No	No	Hieranoid, Inparanoid, OrthoInspector, Panther, Phylome		Add	G2F details (UGT1A5) DRscDB Data: (UGT1A5) Human Protein Atlas (HPA)
544	ENSDARG00000006220	406731	ZDB-GENE-040426-2762	ugt1ab	Human	54600	12541	UGT1A9	ENSG00000241119	5	5.06	moderate	No	No	Hieranoid, Inparanoid, OrthoInspector, Panther, Phylome		Add	G2F details (UGT1A9) DRscDB Data: (UGT1A9) Human Protein Atlas (HPA)
544	ENSDARG00000006220	406731	ZDB-GENE-040426-2762	ugt1ab	Human	54578	12538	UGT1A6	ENSG00000167165	5	5.06	moderate	No	No	Hieranoid, Inparanoid, OrthoInspector, Panther, Phylome		Add	G2F details (UGT1A6) DRscDB Data: (UGT1A6) Human Protein Atlas (HPA)
544	ENSDARG00000006220	406731	ZDB-GENE-040426-2762	ugt1ab	Human	54576	12540	UGT1A8	ENSG00000242366	5	5.06	moderate	No	No	Hieranoid, Inparanoid, OrthoInspector, Panther, Phylome		Add	G2F details (UGT1A8) DRscDB Data: (UGT1A8) Human Protein Atlas (HPA)
544	ENSDARG00000006220	641488		ugt1a1	Human	54658	12530	UGT1A1	ENSG00000241635	3	2.93	moderate	Yes	No	Homologene, orthoMCL, RoundUp		Add	G2F details (UGT1A1) DRscDB Data: (UGT1A1) Human Protein Atlas (HPA)
544	ENSDARG00000006220	100384901	ZDB-GENE-080227-3	ugt1a4	Human	54658	12530	UGT1A1	ENSG00000241635	2	2.01	moderate	Yes	No	Homologene, OMA		Add	G2F details (UGT1A1) DRscDB Data: (UGT1A1) Human Protein Atlas (HPA)
544	ENSDARG00000006220	100384896	ZDB-GENE-080227-5	ugt1a6	Human	54658	12530	UGT1A1	ENSG00000241635	2	2.01	moderate	Yes	No	Homologene, OMA		Add	G2F details (UGT1A1) DRscDB Data: (UGT1A1) Human Protein Atlas (HPA)
545	ENSDARG00000071626	751701	ZDB-GENE-030911-3	ptgdsb.2	Human	5730	9592	PTGDS	ENSG00000107317	8	8.41	moderate	Yes	No	Compara, OMA, OrthoDB, OrthoFinder, orthoMCL, Panther, TreeFam, ZFIN		Add	G2F details (PTGDS) DRscDB Data: (PTGDS) Human Protein Atlas (HPA)
545	ENSDARG00000071626	751701	ZDB-GENE-030911-3	ptgdsb.2	Human	3934	6526	LCN2	ENSG00000148346	4	4	moderate	No	No	Compara, OrthoDB, Panther, TreeFam		Add	G2F details (LCN2) DRscDB Data: (LCN2) Human Protein Atlas (HPA)
545	ENSDARG00000071626	751701	ZDB-GENE-030911-3	ptgdsb.2	Human	414332	20892	LCN10	ENSG00000187922	4	4	moderate	No	No	Compara, OrthoDB, Panther, TreeFam		Add	G2F details (LCN10) DRscDB Data: (LCN10) Human Protein Atlas (HPA)
545	ENSDARG00000071626	751701	ZDB-GENE-030911-3	ptgdsb.2	Human	389812	33777	LCN15	ENSG00000177984	4	3.99	moderate	No	No	Compara, OrthoFinder, Panther, TreeFam		Add	G2F details (LCN15) DRscDB Data: (LCN15) Human Protein Atlas (HPA)
546	ENSDARG00000018809	447830	ZDB-GENE-040912-90	abhd3	Human	84696	17553	ABHD1	ENSG00000143994	4	3.81	moderate	No	Yes	eggNOG, OrthoDB, OrthoFinder, orthoMCL		Add	G2F details (ABHD1) DRscDB Data: (ABHD1) Human Protein Atlas (HPA)
547	ENSDARG00000046012	541497	ZDB-GENE-050327-20	slc47a1	Human	55244	25588	SLC47A1	ENSG00000142494	8	8.3	moderate	Yes	No	Compara, eggNOG, OrthoDB, OrthoFinder, orthoMCL, Panther, TreeFam, ZFIN		Add	G2F details (SLC47A1) DRscDB Data: (SLC47A1) Human Protein Atlas (HPA)
547	ENSDARG00000046012	541497	ZDB-GENE-050327-20	slc47a1	Human	146802	26439	SLC47A2	ENSG00000180638	7	6.8	moderate	No	No	Compara, eggNOG, OrthoDB, OrthoFinder, orthoMCL, Panther, TreeFam		Add	G2F details (SLC47A2) DRscDB Data: (SLC47A2) Human Protein Atlas (HPA)
549	ENSDARG00000011259	791196	ZDB-GENE-070112-1372	trpm1a	Human	54822	17994	TRPM7	ENSG00000092439	4	3.81	moderate	No	No	eggNOG, OrthoDB, OrthoFinder, orthoMCL		Add	G2F details (TRPM7) DRscDB Data: (TRPM7) Human Protein Atlas (HPA)
549	ENSDARG00000011259	791196	ZDB-GENE-070112-1372	trpm1a	Human	80036	17992	TRPM3	ENSG00000083067	4	3.81	moderate	No	No	eggNOG, OrthoDB, OrthoFinder, orthoMCL		Add	G2F details (TRPM3) DRscDB Data: (TRPM3) Human Protein Atlas (HPA)
549	ENSDARG00000011259	791196	ZDB-GENE-070112-1372	trpm1a	Human	140803	17995	TRPM6	ENSG00000119121	4	3.81	moderate	No	No	eggNOG, OrthoDB, OrthoFinder, orthoMCL		Add	G2F details (TRPM6) DRscDB Data: (TRPM6) Human Protein Atlas (HPA)
551	ENSDARG00000031720	777737	ZDB-GENE-040426-1064	clstn1	Human	64084	17448	CLSTN2	ENSG00000158258	5	4.84	moderate	No	No	eggNOG, OrthoDB, OrthoFinder, orthoMCL, RoundUp		Add	G2F details (CLSTN2) DRscDB Data: (CLSTN2) Human Protein Atlas (HPA)
551	ENSDARG00000031720	777737	ZDB-GENE-040426-1064	clstn1	Human	9746	18371	CLSTN3	ENSG00000139182	4	3.81	moderate	No	No	eggNOG, OrthoDB, OrthoFinder, orthoMCL		Add	G2F details (CLSTN3) DRscDB Data: (CLSTN3) Human Protein Atlas (HPA)
553	ENSDARG00000040280	550535	ZDB-GENE-050417-381	zgc:110182	Human	157638	24166	LRATD2	ENSG00000168672	6	6.05	moderate	Yes	No	Compara, Inparanoid, OrthoDB, OrthoInspector, Panther, TreeFam		Add	G2F details (LRATD2) DRscDB Data: (LRATD2) Human Protein Atlas (HPA)
554	ENSDARG00000016598	321892	ZDB-GENE-030131-611	ckmt1	Human	1159	1995	CKMT1B	ENSG00000237289	7	6.79	moderate	No	Yes	Compara, eggNOG, Homologene, OrthoFinder, orthoMCL, Panther, TreeFam		Add	G2F details (CKMT1B) DRscDB Data: (CKMT1B) Human Protein Atlas (HPA)
554	ENSDARG00000016598	321892	ZDB-GENE-030131-611	ckmt1	Human	1160	1996	CKMT2	ENSG00000131730	5	4.84	moderate	No	No	eggNOG, OrthoDB, OrthoFinder, orthoMCL, RoundUp		Add	G2F details (CKMT2) DRscDB Data: (CKMT2) Human Protein Atlas (HPA)
554	ENSDARG00000016598	321892	ZDB-GENE-030131-611	ckmt1	Human	1152	1991	CKB	ENSG00000166165	4	3.94	moderate	No	No	eggNOG, OrthoDB, OrthoFinder, RoundUp		Add	G2F details (CKB) DRscDB Data: (CKB) Human Protein Atlas (HPA)
554	ENSDARG00000016598	321892	ZDB-GENE-030131-611	ckmt1	Human	1158	1994	CKM	ENSG00000104879	4	3.94	moderate	No	No	eggNOG, OrthoDB, OrthoFinder, RoundUp		Add	G2F details (CKM) DRscDB Data: (CKM) Human Protein Atlas (HPA)
555	ENSDARG00000089507	795261	ZDB-GENE-080227-15	ugt1b7	Human	54657	12536	UGT1A4	ENSG00000244474	6	6.08	moderate	No	Yes	Inparanoid, OMA, OrthoDB, OrthoInspector, Panther, Phylome		Add	G2F details (UGT1A4) DRscDB Data: (UGT1A4) Human Protein Atlas (HPA)
555	ENSDARG00000089507	795261	ZDB-GENE-080227-15	ugt1b7	Human	54575	12531	UGT1A10	ENSG00000242515	6	6.08	moderate	No	Yes	Inparanoid, OMA, OrthoDB, OrthoInspector, Panther, Phylome		Add	G2F details (UGT1A10) DRscDB Data: (UGT1A10) Human Protein Atlas (HPA)
555	ENSDARG00000089507	795261	ZDB-GENE-080227-15	ugt1b7	Human	54577	12539	UGT1A7	ENSG00000244122	6	6.08	moderate	No	Yes	Inparanoid, OMA, OrthoDB, OrthoInspector, Panther, Phylome		Add	G2F details (UGT1A7) DRscDB Data: (UGT1A7) Human Protein Atlas (HPA)
555	ENSDARG00000089507	795261	ZDB-GENE-080227-15	ugt1b7	Human	54579	12537	UGT1A5	ENSG00000288705	6	6.08	moderate	No	Yes	Inparanoid, OMA, OrthoDB, OrthoInspector, Panther, Phylome		Add	G2F details (UGT1A5) DRscDB Data: (UGT1A5) Human Protein Atlas (HPA)
555	ENSDARG00000089507	795261	ZDB-GENE-080227-15	ugt1b7	Human	54600	12541	UGT1A9	ENSG00000241119	6	6.08	moderate	No	Yes	Inparanoid, OMA, OrthoDB, OrthoInspector, Panther, Phylome		Add	G2F details (UGT1A9) DRscDB Data: (UGT1A9) Human Protein Atlas (HPA)
555	ENSDARG00000089507	795261	ZDB-GENE-080227-15	ugt1b7	Human	54578	12538	UGT1A6	ENSG00000167165	6	6.08	moderate	No	Yes	Inparanoid, OMA, OrthoDB, OrthoInspector, Panther, Phylome		Add	G2F details (UGT1A6) DRscDB Data: (UGT1A6) Human Protein Atlas (HPA)
555	ENSDARG00000089507	795261	ZDB-GENE-080227-15	ugt1b7	Human	54576	12540	UGT1A8	ENSG00000242366	6	6.08	moderate	No	Yes	Inparanoid, OMA, OrthoDB, OrthoInspector, Panther, Phylome		Add	G2F details (UGT1A8) DRscDB Data: (UGT1A8) Human Protein Atlas (HPA)
555	ENSDARG00000089507	795050	ZDB-GENE-080227-13	ugt1b4	Human	54658	12530	UGT1A1	ENSG00000241635	5	5.02	moderate	Yes	No	eggNOG, Homologene, OMA, OrthoDB, Panther		Add	G2F details (UGT1A1) DRscDB Data: (UGT1A1) Human Protein Atlas (HPA)
555	ENSDARG00000089507	795050	ZDB-GENE-080227-13	ugt1b4	Human	54659	12535	UGT1A3	ENSG00000288702	5	4.95	moderate	Yes	No	Compara, eggNOG, OMA, OrthoDB, Panther		Add	G2F details (UGT1A3) DRscDB Data: (UGT1A3) Human Protein Atlas (HPA)
555	ENSDARG00000089507	100384893	ZDB-GENE-080227-11	ugt1b2	Human	54658	12530	UGT1A1	ENSG00000241635	5	5.02	moderate	Yes	No	eggNOG, Homologene, OMA, OrthoDB, Panther		Add	G2F details (UGT1A1) DRscDB Data: (UGT1A1) Human Protein Atlas (HPA)
555	ENSDARG00000089507	100384893	ZDB-GENE-080227-11	ugt1b2	Human	54659	12535	UGT1A3	ENSG00000288702	5	4.95	moderate	Yes	No	Compara, eggNOG, OMA, OrthoDB, Panther		Add	G2F details (UGT1A3) DRscDB Data: (UGT1A3) Human Protein Atlas (HPA)
555	ENSDARG00000089507	100384903	ZDB-GENE-080227-12	ugt1b3	Human	54658	12530	UGT1A1	ENSG00000241635	5	5.02	moderate	Yes	No	eggNOG, Homologene, OMA, OrthoDB, Panther		Add	G2F details (UGT1A1) DRscDB Data: (UGT1A1) Human Protein Atlas (HPA)
555	ENSDARG00000089507	100384903	ZDB-GENE-080227-12	ugt1b3	Human	54659	12535	UGT1A3	ENSG00000288702	5	4.95	moderate	Yes	No	Compara, eggNOG, OMA, OrthoDB, Panther		Add	G2F details (UGT1A3) DRscDB Data: (UGT1A3) Human Protein Atlas (HPA)
555	ENSDARG00000089507	558508	ZDB-GENE-080227-10	ugt1b1	Human	54658	12530	UGT1A1	ENSG00000241635	5	5.02	moderate	Yes	No	eggNOG, Homologene, OMA, OrthoDB, Panther		Add	G2F details (UGT1A1) DRscDB Data: (UGT1A1) Human Protein Atlas (HPA)
555	ENSDARG00000089507	558508	ZDB-GENE-080227-10	ugt1b1	Human	54659	12535	UGT1A3	ENSG00000288702	4	4.02	moderate	No	No	eggNOG, OMA, OrthoDB, Panther		Add	G2F details (UGT1A3) DRscDB Data: (UGT1A3) Human Protein Atlas (HPA)
555	ENSDARG00000089507	100384899	ZDB-GENE-080227-14	ugt1b5	Human	54658	12530	UGT1A1	ENSG00000241635	4	4.12	moderate	Yes	No	Homologene, OMA, OrthoDB, Panther		Add	G2F details (UGT1A1) DRscDB Data: (UGT1A1) Human Protein Atlas (HPA)
556	ENSDARG00000036967	387290	ZDB-GENE-031201-3	smox	Human	196743	20837	PAOX	ENSG00000148832	5	4.84	moderate	No	No	eggNOG, OrthoDB, OrthoFinder, orthoMCL, RoundUp		Add	G2F details (PAOX) DRscDB Data: (PAOX) Human Protein Atlas (HPA)
559	ENSDARG00000021309	394125	ZDB-GENE-040426-1337	rhoca	Human	387	667	RHOA	ENSG00000067560	5	4.91	moderate	No	No	eggNOG, OrthoDB, OrthoFinder, orthoMCL, Panther		Add	G2F details (RHOA) DRscDB Data: (RHOA) Human Protein Atlas (HPA)
559	ENSDARG00000021309	394125	ZDB-GENE-040426-1337	rhoca	Human	388	668	RHOB	ENSG00000143878	3	2.8	moderate	No	Yes	eggNOG, OrthoFinder, orthoMCL		Add	G2F details (RHOB) DRscDB Data: (RHOB) Human Protein Atlas (HPA)
560	ENSDARG00000039381	336673	ZDB-GENE-030131-8617	ch25hl1.1	Human	9023	1907	CH25H	ENSG00000138135	5	4.97	moderate	Yes	No	eggNOG, OrthoDB, OrthoFinder, Panther, TreeFam		Add	G2F details (CH25H) DRscDB Data: (CH25H) Human Protein Atlas (HPA)
562	ENSDARG00000019541	403086	ZDB-GENE-050302-11	gpt2l	Human	84706	18062	GPT2	ENSG00000166123	5	5.31	moderate	No	No	eggNOG, OrthoDB, OrthoFinder, orthoMCL, ZFIN		Add	G2F details (GPT2) DRscDB Data: (GPT2) Human Protein Atlas (HPA)
563	ENSDARG00000091418	568263	ZDB-GENE-030131-9475	snx17	Human	169166	28605	SNX31	ENSG00000174226	4	3.94	moderate	No	Yes	eggNOG, OrthoDB, OrthoFinder, RoundUp		Add	G2F details (SNX31) DRscDB Data: (SNX31) Human Protein Atlas (HPA)
565	ENSDARG00000054858	568138	ZDB-GENE-050208-453	tp53bp2b	Human	7159	12000	TP53BP2	ENSG00000143514	11	11.25	moderate	Yes	No	Compara, eggNOG, OMA, OrthoDB, OrthoFinder, orthoMCL, Panther, Phylome, RoundUp, TreeFam, ZFIN		Add	G2F details (TP53BP2) DRscDB Data: (TP53BP2) Human Protein Atlas (HPA)
565	ENSDARG00000054858	568138	ZDB-GENE-050208-453	tp53bp2b	Human	23368	14950	PPP1R13B	ENSG00000088808	5	4.84	moderate	No	No	eggNOG, OrthoDB, OrthoFinder, orthoMCL, RoundUp		Add	G2F details (PPP1R13B) DRscDB Data: (PPP1R13B) Human Protein Atlas (HPA)
566	ENSDARG00000055339	557349	ZDB-GENE-050506-64	si:ch73-1a9.4	Human	4285	7104	MIPEP	ENSG00000027001	9	8.94	moderate	Yes	No	Compara, eggNOG, Hieranoid, OMA, OrthoDB, OrthoFinder, Panther, RoundUp, TreeFam		Add	G2F details (MIPEP) DRscDB Data: (MIPEP) Human Protein Atlas (HPA)
567	ENSDARG00000010434	393775	ZDB-GENE-040426-1774	clu	Human	102465508	50240	MIR6843	ENSG00000284280	2	1.94	moderate	No	Yes	Compara, OMA		(1) Show Add	G2F details (MIR6843) DRscDB Data: (MIR6843) Human Protein Atlas (HPA)
571	ENSDARG00000075706	561671	ZDB-GENE-070705-17	si:ch211-106h4.9	Human	25924	19156	MYRIP	ENSG00000170011	5	5	moderate	Yes	No	Compara, OrthoDB, OrthoFinder, Panther, TreeFam		Add	G2F details (MYRIP) DRscDB Data: (MYRIP) Human Protein Atlas (HPA)
571	ENSDARG00000075706	561671	ZDB-GENE-070705-17	si:ch211-106h4.9	Human	4336	7189	MOBP	ENSG00000168314	3	3.04	moderate	No	Yes	Compara, OrthoDB, Panther		Add	G2F details (MOBP) DRscDB Data: (MOBP) Human Protein Atlas (HPA)
572	ENSDARG00000096594	553501	ZDB-GENE-060810-31	lratb.1	Human	9227	6685	LRAT	ENSG00000121207	8	8.37	moderate	Yes	No	Compara, eggNOG, Homologene, OMA, orthoMCL, Panther, RoundUp, ZFIN		Add	G2F details (LRAT) DRscDB Data: (LRAT) Human Protein Atlas (HPA)
573	ENSDARG00000034718	359833	ZDB-GENE-030711-1	tfpia	Human	100526773	38825	EPPIN-WFDC6	ENSG00000249139	2	1.9	moderate	No	Yes	eggNOG, OrthoFinder		Add	G2F details (EPPIN-WFDC6) DRscDB Data: (EPPIN-WFDC6) Human Protein Atlas (HPA)
573	ENSDARG00000034718	359833	ZDB-GENE-030711-1	tfpia	Human	57119	15932	EPPIN	ENSG00000101448	2	1.9	moderate	No	Yes	eggNOG, OrthoFinder		Add	G2F details (EPPIN) DRscDB Data: (EPPIN) Human Protein Atlas (HPA)
573	ENSDARG00000034718	359833	ZDB-GENE-030711-1	tfpia	Human	140870	16164	WFDC6	ENSG00000243543	2	1.9	moderate	No	Yes	eggNOG, OrthoFinder		Add	G2F details (WFDC6) DRscDB Data: (WFDC6) Human Protein Atlas (HPA)
574	ENSDARG00000077709	797187	ZDB-GENE-081105-73	iqsec2b	Human	9922	29112	IQSEC1	ENSG00000144711	5	4.84	moderate	No	No	eggNOG, OrthoDB, OrthoFinder, orthoMCL, RoundUp		Add	G2F details (IQSEC1) DRscDB Data: (IQSEC1) Human Protein Atlas (HPA)
576	ENSDARG00000005343	447831	ZDB-GENE-040912-92	ccdc85al	Human	114800	29400	CCDC85A	ENSG00000055813	10	9.86	moderate	Yes	No	Compara, eggNOG, Hieranoid, Inparanoid, OMA, OrthoFinder, OrthoInspector, Panther, Phylome, TreeFam		Add	G2F details (CCDC85A) DRscDB Data: (CCDC85A) Human Protein Atlas (HPA)
577	ENSDARG00000032705	405850	ZDB-GENE-040426-2437	foxg1b	Human	2290	3811	FOXG1	ENSG00000176165	5	4.86	moderate	Yes	No	eggNOG, OrthoFinder, orthoMCL, Panther, TreeFam		Add	G2F details (FOXG1) DRscDB Data: (FOXG1) Human Protein Atlas (HPA)
578	ENSDARG00000093303	100003209	ZDB-GENE-060526-259	ifitm1	Human	10410	5414	IFITM3	ENSG00000142089	6	6.08	moderate	No	Yes	eggNOG, Inparanoid, OrthoFinder, OrthoInspector, Panther, RoundUp		Add	G2F details (IFITM3) DRscDB Data: (IFITM3) Human Protein Atlas (HPA)
578	ENSDARG00000093303	100003209	ZDB-GENE-060526-259	ifitm1	Human	10581	5413	IFITM2	ENSG00000185201	4	4.15	moderate	No	Yes	Inparanoid, OrthoFinder, OrthoInspector, Panther		Add	G2F details (IFITM2) DRscDB Data: (IFITM2) Human Protein Atlas (HPA)
578	ENSDARG00000093303	100003209	ZDB-GENE-060526-259	ifitm1	Human	402778	40022	IFITM10	ENSG00000244242	4	3.87	moderate	No	Yes	eggNOG, Panther, Phylome, TreeFam		Add	G2F details (IFITM10) DRscDB Data: (IFITM10) Human Protein Atlas (HPA)
580	ENSDARG00000058381	562552	ZDB-GENE-030131-4309	zgc:171775	Human	5603	6875	MAPK13	ENSG00000156711	4	3.87	moderate	Yes	No	eggNOG, OrthoDB, OrthoFinder, TreeFam		Add	G2F details (MAPK13) DRscDB Data: (MAPK13) Human Protein Atlas (HPA)
580	ENSDARG00000058381	562552	ZDB-GENE-030131-4309	zgc:171775	Human	6300	6874	MAPK12	ENSG00000188130	4	3.87	moderate	Yes	No	eggNOG, OrthoDB, OrthoFinder, TreeFam		Add	G2F details (MAPK12) DRscDB Data: (MAPK12) Human Protein Atlas (HPA)
582	ENSDARG00000074635	558924	ZDB-GENE-031006-12	abca1a	Human	10347	37	ABCA7	ENSG00000064687	5	4.91	moderate	No	Yes	eggNOG, OrthoDB, OrthoFinder, orthoMCL, Panther		Add	G2F details (ABCA7) DRscDB Data: (ABCA7) Human Protein Atlas (HPA)
582	ENSDARG00000074635	558924	ZDB-GENE-031006-12	abca1a	Human	24	34	ABCA4	ENSG00000198691	4	3.83	moderate	No	No	eggNOG, OrthoFinder, orthoMCL, RoundUp		Add	G2F details (ABCA4) DRscDB Data: (ABCA4) Human Protein Atlas (HPA)
583	ENSDARG00000037941	436686	ZDB-GENE-040718-110	syt5a	Human	127833	11510	SYT2	ENSG00000143858	6	5.88	moderate	Yes	No	eggNOG, OrthoDB, OrthoFinder, Panther, Phylome, TreeFam		Add	G2F details (SYT2) DRscDB Data: (SYT2) Human Protein Atlas (HPA)
583	ENSDARG00000037941	436686	ZDB-GENE-040718-110	syt5a	Human	6861	11513	SYT5	ENSG00000129990	4	4.41	moderate	No	Yes	eggNOG, OrthoDB, OrthoFinder, ZFIN		Add	G2F details (SYT5) DRscDB Data: (SYT5) Human Protein Atlas (HPA)
584	ENSDARG00000052994	100535877	ZDB-GENE-040426-2125	slc25a28	Human	51312	29786	SLC25A37	ENSG00000147454	5	4.84	moderate	No	No	eggNOG, OrthoDB, OrthoFinder, orthoMCL, RoundUp		Add	G2F details (SLC25A37) DRscDB Data: (SLC25A37) Human Protein Atlas (HPA)
585	ENSDARG00000102612	393932	ZDB-GENE-040426-1047	slc15a4	Human	51296	18068	SLC15A3	ENSG00000110446	4	4.01	moderate	No	Yes	eggNOG, OrthoDB, OrthoFinder, Panther		Add	G2F details (SLC15A3) DRscDB Data: (SLC15A3) Human Protein Atlas (HPA)
589	ENSDARG00000101293	567134	ZDB-GENE-061013-393	zgc:153916	Human	5586	9406	PKN2	ENSG00000065243	9	9.03	moderate	Yes	No	Compara, Hieranoid, Inparanoid, OrthoDB, OrthoFinder, OrthoInspector, Panther, Phylome, RoundUp		Add	G2F details (PKN2) DRscDB Data: (PKN2) Human Protein Atlas (HPA)
589	ENSDARG00000101293	567134	ZDB-GENE-061013-393	zgc:153916	Human	29941	17999	PKN3	ENSG00000160447	4	4.14	moderate	No	No	OrthoDB, OrthoFinder, Panther, RoundUp		Add	G2F details (PKN3) DRscDB Data: (PKN3) Human Protein Atlas (HPA)
589	ENSDARG00000101293	567134	ZDB-GENE-061013-393	zgc:153916	Human	5585	9405	PKN1	ENSG00000123143	4	4.14	moderate	No	No	OrthoDB, OrthoFinder, Panther, RoundUp		Add	G2F details (PKN1) DRscDB Data: (PKN1) Human Protein Atlas (HPA)
590	ENSDARG00000012625	570761	ZDB-GENE-060929-160	prkag2a	Human	5571	9385	PRKAG1	ENSG00000181929	5	4.84	moderate	No	No	eggNOG, OrthoDB, OrthoFinder, orthoMCL, RoundUp		Add	G2F details (PRKAG1) DRscDB Data: (PRKAG1) Human Protein Atlas (HPA)
591	ENSDARG00000020876	794083	ZDB-GENE-120910-1	pdk2a	Human	5165	8811	PDK3	ENSG00000067992	5	4.84	moderate	No	No	eggNOG, OrthoDB, OrthoFinder, orthoMCL, RoundUp		Add	G2F details (PDK3) DRscDB Data: (PDK3) Human Protein Atlas (HPA)
591	ENSDARG00000020876	794083	ZDB-GENE-120910-1	pdk2a	Human	5163	8809	PDK1	ENSG00000152256	5	4.84	moderate	No	No	eggNOG, OrthoDB, OrthoFinder, orthoMCL, RoundUp		Add	G2F details (PDK1) DRscDB Data: (PDK1) Human Protein Atlas (HPA)
591	ENSDARG00000020876	794083	ZDB-GENE-120910-1	pdk2a	Human	5166	8812	PDK4	ENSG00000004799	5	4.84	moderate	No	No	eggNOG, OrthoDB, OrthoFinder, orthoMCL, RoundUp		Add	G2F details (PDK4) DRscDB Data: (PDK4) Human Protein Atlas (HPA)
592	ENSDARG00000001879	557290	ZDB-GENE-061207-13	nav2b	Human	89797	15997	NAV2	ENSG00000166833	7	7.4	moderate	Yes	No	Compara, eggNOG, OrthoDB, OrthoFinder, Panther, TreeFam, ZFIN		Add	G2F details (NAV2) DRscDB Data: (NAV2) Human Protein Atlas (HPA)
593	ENSDARG00000009499	569553	ZDB-GENE-030131-4172	syne1a	Human	23224	17084	SYNE2	ENSG00000054654	4	3.91	moderate	No	No	eggNOG, OrthoDB, orthoMCL, Panther		Add	G2F details (SYNE2) DRscDB Data: (SYNE2) Human Protein Atlas (HPA)
594	ENSDARG00000052497	503757	ZDB-GENE-050306-38	zgc:110789	Human	9963	10974	SLC23A1	ENSG00000170482	5	4.84	moderate	Yes	No	eggNOG, OrthoDB, OrthoFinder, orthoMCL, RoundUp		Add	G2F details (SLC23A1) DRscDB Data: (SLC23A1) Human Protein Atlas (HPA)
594	ENSDARG00000052497	503757	ZDB-GENE-050306-38	zgc:110789	Human	9962	10973	SLC23A2	ENSG00000089057	5	4.84	moderate	Yes	No	eggNOG, OrthoDB, OrthoFinder, orthoMCL, RoundUp		Add	G2F details (SLC23A2) DRscDB Data: (SLC23A2) Human Protein Atlas (HPA)
595	ENSDARG00000073699	100170785	ZDB-GENE-080721-25	col9a1a	Human	1297	2217	COL9A1	ENSG00000112280	6	6.24	moderate	Yes	No	Compara, Homologene, OrthoFinder, orthoMCL, Phylome, ZFIN		Add	G2F details (COL9A1) DRscDB Data: (COL9A1) Human Protein Atlas (HPA)
596	ENSDARG00000078567	567909		LOC567909	Human	91694	26302	LONRF1	ENSG00000154359	4	3.85	moderate	Yes	No	Compara, OMA, OrthoDB, orthoMCL		Add	G2F details (LONRF1) DRscDB Data: (LONRF1) Human Protein Atlas (HPA)
598	ENSDARG00000003998	790943	ZDB-GENE-061215-64	phyhipla	Human	84457	29378	PHYHIPL	ENSG00000165443	8	8.25	moderate	Yes	No	Compara, eggNOG, OrthoDB, OrthoFinder, orthoMCL, Panther, Phylome, ZFIN		Add	G2F details (PHYHIPL) DRscDB Data: (PHYHIPL) Human Protein Atlas (HPA)
598	ENSDARG00000003998	790943	ZDB-GENE-061215-64	phyhipla	Human	9796	16865	PHYHIP	ENSG00000168490	5	4.88	moderate	No	No	eggNOG, OMA, OrthoDB, OrthoFinder, TreeFam		Add	G2F details (PHYHIP) DRscDB Data: (PHYHIP) Human Protein Atlas (HPA)
599	ENSDARG00000020645	492363	ZDB-GENE-041114-206	slc7a3a	Human	84889	11061	SLC7A3	ENSG00000165349	14	14.4	moderate	Yes	No	Compara, eggNOG, Hieranoid, Homologene, Inparanoid, OMA, OrthoDB, OrthoFinder, OrthoInspector, Panther, Phylome, RoundUp, TreeFam, ZFIN		Add	G2F details (SLC7A3) DRscDB Data: (SLC7A3) Human Protein Atlas (HPA)
599	ENSDARG00000020645	492363	ZDB-GENE-041114-206	slc7a3a	Human	6542	11060	SLC7A2	ENSG00000003989	4	3.94	moderate	No	No	eggNOG, OrthoDB, OrthoFinder, RoundUp		Add	G2F details (SLC7A2) DRscDB Data: (SLC7A2) Human Protein Atlas (HPA)
599	ENSDARG00000020645	492363	ZDB-GENE-041114-206	slc7a3a	Human	6541	11057	SLC7A1	ENSG00000139514	4	3.94	moderate	No	No	eggNOG, OrthoDB, OrthoFinder, RoundUp		Add	G2F details (SLC7A1) DRscDB Data: (SLC7A1) Human Protein Atlas (HPA)
601	ENSDARG00000067520	100009650	ZDB-GENE-070209-32	zgc:158482	Human	11001	10996	SLC27A2	ENSG00000140284	8	7.78	moderate	Yes	No	eggNOG, Hieranoid, OrthoDB, OrthoFinder, orthoMCL, Panther, Phylome, TreeFam		Add	G2F details (SLC27A2) DRscDB Data: (SLC27A2) Human Protein Atlas (HPA)
601	ENSDARG00000067520	100009650	ZDB-GENE-070209-32	zgc:158482	Human	10998	10999	SLC27A5	ENSG00000083807	7	6.81	moderate	No	Yes	Compara, eggNOG, OrthoDB, OrthoFinder, Panther, Phylome, TreeFam		Add	G2F details (SLC27A5) DRscDB Data: (SLC27A5) Human Protein Atlas (HPA)
601	ENSDARG00000067520	100009650	ZDB-GENE-070209-32	zgc:158482	Human	11000	10997	SLC27A3	ENSG00000143554	4	4.01	moderate	No	No	eggNOG, OrthoDB, OrthoFinder, Panther		Add	G2F details (SLC27A3) DRscDB Data: (SLC27A3) Human Protein Atlas (HPA)
601	ENSDARG00000067520	100009650	ZDB-GENE-070209-32	zgc:158482	Human	10999	10998	SLC27A4	ENSG00000167114	4	3.81	moderate	No	No	eggNOG, OrthoDB, OrthoFinder, orthoMCL		Add	G2F details (SLC27A4) DRscDB Data: (SLC27A4) Human Protein Atlas (HPA)
601	ENSDARG00000067520	100009650	ZDB-GENE-070209-32	zgc:158482	Human	28965	11000	SLC27A6	ENSG00000113396	4	3.81	moderate	No	No	eggNOG, OrthoDB, OrthoFinder, orthoMCL		Add	G2F details (SLC27A6) DRscDB Data: (SLC27A6) Human Protein Atlas (HPA)
[truncated: 1,325 more rows]

## Sheet: Table S4. IPA funtion anno
© 2000-2022 QIAGEN. All rights reserved.
ID	Flags	Symbol	Entrez Gene Name	Location	Type(s)	Drug(s)
[truncated: 478 more rows]
